# Supplementary material for: Computerized Cognitive Training by Healthy Older and Younger Adults: Age Comparisons of Overall Efficacy and Selective Effects on Cognition
Source: Front Neurol. 2021 Jan 8;11:564317. doi: 10.3389/fneur.2020.564317 (PMC7832391; doi:10.3389/fneur.2020.564317)
Supplement: Supplementary file 4 [file Data_Sheet_4.CSV]

participant_id	gender	education	age_round	age_bucket	three_age_bins	group	four_groups	active_days	est_hours	AR_raw_pre	AR_norm_pre	TTS_raw_pre	TTS_norm_pre	GNG_raw_pre	GNG_norm_pre	GR_raw_pre	GR_norm_pre	MS_raw_pre	MS_norm_pre	PM_raw_pre	PM_norm_pre	RMS_raw_pre	RMS_norm_pre	GI_pre	AR_raw_post	AR_norm_post	TTS_raw_post	TTS_norm_post	GNG_raw_post	GNG_norm_post	GR_raw_post	GR_norm_post	MS_raw_post	MS_norm_post	PM_raw_post	PM_norm_post	RMS_raw_post	RMS_norm_post	GI_post	AR_d	TTS_d	GNG_d	GR_d	MS_d	PM_d	RMS_d	GI_d	lost_track_details_pre	misplaced_items_pre
1	f	bachelors degree	51	o	M	crosswords	crosswords.o	56	29.26789472	14	97.84621295	-526.797	85.02558854	-595	71.57329045	3	83.61639412	6	102.2366507	15	120.1949445	5	97.01798159	89.55509299	12	91.65967918	-501.478	86.73210877	-662	65.84716509	6	93.70903787	6	102.2366507	13	107.6954863	4	84.66554136	83.50770514	-6.18653377	1.706520233	-5.726125365	10.09264375	0	-12.49945815	-12.35244023	-6.047387849	1	1
2	m	NA	24	y	Y	lumosity	lumosity.y	54	11.35943167	17	106.9689563	-527.63	84.95180732	-340	124.913806	13	116.0032086	6	102.2366507	15	120.1949445	5	97.01798159	112.5237107	19	112.8487574	-260.226	105.4580238	-312	134.6168278	9	103.2905327	6	102.2366507	16	127.595966	5	97.01798159	120.1305667	5.879801159	20.50621648	9.703021804	-12.7126759	0	7.40102151	0	7.606855989	3	5
3	m	hs grad or less	19	y	Y	crosswords	crosswords.y	6	0.574864722	18	109.8684494	-116.13	121.7917755	-336	126.0996401	8	100.0782549	8	127.5555825	15	120.1949445	6	109.1710722	128.1185036	21	118.4923683	-427.918	91.82445315	-439	96.43789596	14	119.1220614	6	102.2366507	17	137.1423714	5	97.01798159	114.9193124	8.6239189	-29.96732234	-29.66174416	19.0438065	-25.31893183	16.94742694	-12.15309064	-13.19919123	1	1
4	f	bachelors degree	21	y	Y	crosswords	crosswords.y	21	7.613530555	20	115.7229157	-290.774	102.6369078	-340	124.913806	18	131.5085227	6	102.2366507	15	120.1949445	7	121.0680766	129.0818081	15	100.8687377	-352.808	97.65024282	-322	130.8000955	17	128.2711147	7	114.8036483	14	113.8168191	5	97.01798159	120.1673085	-14.854178	-4.98666502	5.886289521	-3.237407947	12.56699756	-6.378125399	-24.05009504	-8.914499582	3	2
5	m	bachelors degree	31	y	Y	lumosity	lumosity.y	43	8.665998889	22	121.4547391	-383.797	95.23706856	-370	115.2217812	9	103.2905327	7	114.8036483	11	97.4198399	6	109.1710722	113.5344889	20	115.7229157	-391.296	94.52604736	-394	107.9902732	13	116.0032086	8	127.5555825	13	107.6954863	5	97.01798159	115.9834721	-5.731823328	-0.711021198	-7.231508049	12.7126759	12.75193428	10.27564642	-12.15309064	2.448983174	2	3
6	f	NA	25	y	Y	crosswords	crosswords.y	15	3.408564722	17	106.9689563	-209.268	109.5605231	-450	93.96044048	4	87.02169153	6	102.2366507	13	107.6954863	5	97.01798159	100.8799359	14	97.84621295	-157.142	115.5944001	-483	87.46044138	5	90.43034386	6	102.2366507	5	78.88184489	5	97.01798159	92.34274355	-9.122743327	6.033877051	-6.499999102	3.408652324	0	-28.81364142	0	-8.537192402	2	5
7	f	advanced degree	45	y	M	lumosity	lumosity.y	0	0	20	115.7229157	-66.897	131.4411616	-415	102.1086165	14	119.1220614	5	90.01558593	13	107.6954863	3	72.32266178	109.4875853	23	124.4099523	-103.832	123.2148701	-358	118.9387339	9	103.2905327	5	90.01558593	7	84.57097827	6	109.1710722	112.7308387	8.687036577	-8.226291501	16.83011739	-15.83152864	0	-23.12450804	36.84841046	3.243253344	3	2
8	m	advanced degree	27	y	Y	crosswords	crosswords.y	40	5.968255278	9	82.29468311	-473.296	89.04078774	-380	112.1319449	10	106.4827223	5	90.01558593	14	113.8168191	6	109.1710722	100.5590901	14	97.84621295	-547.385	83.79788129	-295	141.9590755	8	100.0782549	8	127.5555825	14	113.8168191	7	121.0680766	120.7918807	15.55152985	-5.242906454	29.82713061	-6.404467432	37.5399966	0	11.89700439	20.23279053	4	4
9	f	hs grad or less	40	y	M	crosswords	crosswords.y	39	9.5456375	16	103.9697618	-227.897	107.3910175	-393	108.3012051	9	103.2905327	5	90.01558593	14	113.8168191	4	84.66554136	102.7126304	12	91.65967918	-264.024	104.8570837	-369	115.5624496	9	103.2905327	5	90.01558593	11	97.4198399	4	84.66554136	96.76670079	-12.31008259	-2.533933808	7.261244536	0	0	-16.39697917	0	-5.945929584	4	4
10	f	advanced degree	50	o	M	lumosity	lumosity.o	69	28.23780681	11	88.54321663	-334.177	99.1163312	-456	92.66782893	3	83.61639412	6	102.2366507	16	127.595966	5	97.01798159	97.55210923	22	121.4547391	-320.396	100.3987723	-310	135.3517215	5	90.43034386	7	114.8036483	15	120.1949445	6	109.1710722	122.2964448	32.91152243	1.282441076	42.6838926	6.813949733	12.56699756	-7.40102151	12.15309064	24.74433561	5	4
11	f	hs grad or less	46	y	M	lumosity	lumosity.y	64	13.14956625	9	82.29468311	-703.425	74.66186505	-546	77.61316791	10	106.4827223	5	90.01558593	3	70.96685372	4	84.66554136	73.12082012	12	91.65967918	-331.264	99.38870045	-479	88.32752517	9	103.2905327	5	90.01558593	10	93.4066386	4	84.66554136	87.7227764	9.364996075	24.7268354	10.71435726	-3.19218958	0	22.43978488	0	14.60195629	1	1
12	f	NA	52	o	M	lumosity	lumosity.o	32	7.725893611	11	88.54321663	-581.489	81.89966869	-352	120.8211365	7	96.91529003	6	102.2366507	10	93.4066386	3	72.32266178	89.08453823	11	88.54321663	-521.282	85.34120769	-367	116.2690585	8	100.0782549	5	90.01558593	7	84.57097827	5	97.01798159	90.52606548	0	3.441539002	-4.552077996	3.162964829	-12.22106476	-8.835660325	24.69531981	1.441527253	3	3
13	f	NA	21	y	Y	lumosity	lumosity.y	21	7.671435139	9	82.29468311	-358.931	96.91148389	-553	76.77277934	2	80.40665395	5	90.01558593	11	97.4198399	5	97.01798159	80.55437769	9	82.29468311	-545.051	83.95723497	-463	91.33146433	7	96.91529003	4	78.64839376	14	113.8168191	6	109.1710722	89.07968165	0	-12.95424891	14.55868499	16.50863608	-11.36719217	16.39697917	12.15309064	8.525303961	3	4
14	m	hs grad or less	45	y	M	lumosity	lumosity.y	46	12.84557431	20	115.7229157	-361.798	96.72855041	-396	107.3069857	8	100.0782549	6	102.2366507	7	84.57097827	4	84.66554136	97.71058249	12	91.65967918	-357.241	97.17365544	-359	118.7337831	7	96.91529003	6	102.2366507	10	93.4066386	6	109.1710722	102.0597034	-24.06323654	0.445105032	11.42679738	-3.162964829	0	8.835660325	24.50553087	4.349120891	4	4
15	m	hs grad or less	31	y	Y	lumosity	lumosity.y	34	8.672374028	10	85.57372703	-47.359	136.9072026	-406	104.6415947	4	87.02169153	4	78.64839376	11	97.4198399	5	97.01798159	96.70183256	7	75.29108861	-453.189	89.78654273	-416	101.8154552	9	103.2905327	6	102.2366507	2	66.18670658	5	97.01798159	84.27708427	-10.28263842	-47.12065984	-2.82613946	16.26884117	23.58825693	-31.23313332	0	-12.42474829	2	3
16	m	some college	32	y	Y	crosswords	crosswords.y	38	9.848784444	22	121.4547391	-341.62	98.70159152	-385	110.621335	8	100.0782549	6	102.2366507	5	78.88184489	6	109.1710722	104.9789814	21	118.4923683	-369.063	96.21903	-380	112.1319449	15	122.4665932	6	102.2366507	10	93.4066386	4	84.66554136	107.1354314	-2.962370769	-2.482561523	1.510609905	22.38833832	0	14.52479371	-24.50553087	2.156450025	1	2
17	f	advanced degree	43	y	M	lumosity	lumosity.y	50	14.89680542	24	127.258891	-15.849	147.9585436	-438	96.65600612	10	106.4827223	7	114.8036483	15	120.1949445	6	109.1710722	130.2962514	21	118.4923683	-164.087	114.426273	-434	97.43874756	13	116.0032086	7	114.8036483	16	127.595966	6	109.1710722	123.9056508	-8.766522723	-33.53227066	0.78274144	9.520486319	0	7.40102151	0	-6.390600579	4	3
18	m	hs grad or less	71	o	O	crosswords	crosswords.o	63	15.34536111	11	88.54321663	-628.255	79.00164119	-446	94.76830456	6	93.70903787	5	90.01558593	1	58.40134056	4	84.66554136	73.72935182	11	88.54321663	-533.173	84.62148798	-414	102.4290109	4	87.02169153	3	69.29136417	10	93.4066386	3	72.32266178	75.8796134	0	5.619846783	7.660706355	-6.687346339	-20.72422176	35.00529803	-12.34287958	2.150261582	4	4
19	f	bachelors degree	26	y	Y	crosswords	crosswords.y	55	15.71786722	20	115.7229157	-357.241	97.17365544	-403	105.3347821	15	122.4665932	7	114.8036483	13	107.6954863	6	109.1710722	117.3004549	17	106.9689563	-673.242	76.25224339	-400	106.1123696	15	122.4665932	7	114.8036483	16	127.595966	6	109.1710722	115.2280186	-8.753959446	-20.92141204	0.777587529	0	0	19.90047966	0	-2.072436377	1	4
20	f	hs grad or less	66	o	O	lumosity	lumosity.o	35	18.34493653	16	103.9697618	-184.97	112.6083954	-428	98.81002988	2	80.40665395	5	90.01558593	11	97.4198399	5	97.01798159	95.0839741	13	94.8395275	-221.795	108.6465268	-419	100.9770084	2	80.40665395	6	102.2366507	9	90.06668352	4	84.66554136	90.52606548	-9.130234283	-3.961868534	2.16697854	0	12.22106476	-7.353156381	-12.35244023	-4.55790862	3	3
21	f	some college	54	o	M	lumosity	lumosity.o	3	1.856341806	8	78.75052699	-294.287	102.330897	-412	103.0124308	7	96.91529003	6	102.2366507	14	113.8168191	4	84.66554136	95.4209116	10	85.57372703	-408.93	93.36557027	-382	111.5668384	7	96.91529003	6	102.2366507	12	102.1387281	4	84.66554136	94.1900796	6.823200042	-8.965326729	8.554407603	0	0	-11.678091	0	-1.230831993	3	3
22	f	advanced degree	63	o	M	lumosity	lumosity.o	46	13.89990375	13	94.8395275	-171.726	113.7429451	-540	78.4620184	4	87.02169153	3	69.29136417	12	102.1387281	4	84.66554136	83.00042612	13	94.8395275	-493.569	87.53427915	-491	86.02866905	1	77.29023023	5	90.01558593	12	102.1387281	4	84.66554136	80.96995768	0	-26.20866596	7.566650653	-9.731461301	20.72422176	0	0	-2.030468434	2	4
23	f	bachelors degree	63	o	M	lumosity	lumosity.o	65	27.92344028	15	100.8687377	-261.277	105.2079414	-604	70.54309358	10	106.4827223	5	90.01558593	13	107.6954863	5	97.01798159	94.56187862	17	106.9689563	-490.352	87.73839693	-448	94.35441755	6	93.70903787	5	90.01558593	14	113.8168191	5	97.01798159	95.86791579	6.100218555	-17.4695445	23.81132397	-12.77368442	0	6.121332753	0	1.306037177	4	2
24	m	advanced degree	41	y	M	lumosity	lumosity.y	62	26.00824139	19	112.8487574	-268.303	104.4698927	-417	101.5417153	9	103.2905327	6	102.2366507	16	127.595966	5	97.01798159	111.7482852	16	103.9697618	-264.024	104.8570837	-502	84.21887411	7	96.91529003	5	90.01558593	9	90.06668352	6	109.1710722	94.87509528	-8.878995662	0.387190953	-17.32284119	-6.375242681	-12.22106476	-37.52928246	12.15309064	-16.87318987	4	5
25	f	hs grad or less	63	o	M	lumosity	lumosity.o	56	11.46599444	11	88.54321663	-601.241	80.54574021	-456	92.66782893	2	80.40665395	6	102.2366507	4	75.15990345	4	84.66554136	77.13664955	12	91.65967918	-547.385	83.79788129	-464	91.15914822	0	70.89374579	6	102.2366507	12	102.1387281	5	97.01798159	84.89623158	3.116462554	3.252141077	-1.508680709	-9.512908155	0	26.97882461	12.35244023	7.759582031	4	4
26	m	bachelors degree	74	o	O	crosswords	crosswords.o	54	13.02597639	11	88.54321663	-352.224	97.77088515	-495	85.37121426	4	87.02169153	0	61.31611067	8	87.11355617	4	84.66554136	74.29748555	15	100.8687377	-633.53	78.12222473	-481	87.8628862	5	90.43034386	4	78.64839376	5	78.88184489	4	84.66554136	76.22611021	12.3255211	-19.64866042	2.491671934	3.408652324	17.33228309	-8.231711283	0	1.928624666	4	3
27	m	some college	21	y	Y	lumosity	lumosity.y	69	19.79037542	15	100.8687377	-172.743	113.3507497	-412	103.0124308	12	112.8487574	5	90.01558593	14	113.8168191	7	121.0680766	113.0488876	15	100.8687377	-402.742	93.77814388	-361	118.2244304	6	93.70903787	8	127.5555825	13	107.6954863	7	121.0680766	115.1161468	0	-19.57260585	15.21199964	-19.13971957	37.5399966	-6.121332753	0	2.06725912	2	3
28	m	bachelors degree	27	y	Y	crosswords	crosswords.y	26	8.109206667	22	121.4547391	-194.564	111.2483709	-303	137.5558559	10	106.4827223	7	114.8036483	8	87.11355617	7	121.0680766	124.4380087	18	109.8684494	-120.462	120.6949278	-381	111.8447446	15	122.4665932	5	90.01558593	13	107.6954863	5	97.01798159	114.3436457	-11.58628967	9.446556929	-25.71111129	15.98387089	-24.78806232	20.58193014	-24.05009504	-10.09436291	4	4
29	m	hs grad or less	63	o	M	crosswords	crosswords.o	0	0	13	94.8395275	-483.891	88.17560324	-421	100.3950446	10	106.4827223	3	69.29136417	11	97.4198399	5	97.01798159	88.38293042	15	100.8687377	-214.467	109.3921935	-432	97.8951468	4	87.02169153	7	114.8036483	9	90.06668352	6	109.1710722	102.0371355	6.02921023	21.21659028	-2.49989777	-19.46103075	45.51228408	-7.353156381	12.15309064	13.65420508	2	4
30	m	advanced degree	64	o	M	lumosity	lumosity.o	20	4.40109625	13	94.8395275	-398.503	94.03714158	-389	109.3559537	5	90.43034386	0	61.31611067	3	70.96685372	3	72.32266178	74.80046366	17	106.9689563	-357.848	96.99137146	-391	108.8231249	2	80.40665395	5	90.01558593	5	78.88184489	3	72.32266178	83.96383546	12.12942879	2.954229887	-0.532828735	-10.02368991	28.69947526	7.914991175	0	9.163371793	4	4
31	f	hs grad or less	39	y	Y	lumosity	lumosity.y	43	7.602538472	12	91.65967918	-436.278	91.13253476	-573	74.3619491	12	112.8487574	6	102.2366507	13	107.6954863	5	97.01798159	94.35441755	13	94.8395275	-409.642	93.2956396	-391	108.8231249	13	116.0032086	6	102.2366507	6	81.96893327	3	72.32266178	92.34274355	3.179848312	2.163104841	34.46117583	3.154451166	0	-25.72655305	-24.69531981	-2.011674008	3	3
32	m	bachelors degree	20	y	Y	crosswords	crosswords.y	5	1.514797222	12	91.65967918	-193.626	111.4019867	-378	112.741526	9	103.2905327	6	102.2366507	8	87.11355617	5	97.01798159	101.1264321	15	100.8687377	-98.626	124.3124216	-409	103.8964838	10	106.4827223	5	90.01558593	10	93.4066386	5	97.01798159	103.7232975	9.209058542	12.9104349	-8.845042236	3.19218958	-12.22106476	6.293082423	0	2.596865445	3	4
33	NA	NA	33	y	Y	crosswords	crosswords.y	50	19.35982444	19	112.8487574	-61.281	132.9285386	-568	74.96699241	11	109.6062241	7	114.8036483	15	120.1949445	7	121.0680766	120.9587229	14	97.84621295	-285.119	103.0732927	-511	82.72850025	10	106.4827223	7	114.8036483	16	127.595966	6	109.1710722	110.1384081	-15.00254449	-29.85524584	7.761507837	-3.123501776	0	7.40102151	-11.89700439	-10.82031477	3	2
34	m	some college	23	y	Y	crosswords	crosswords.y	0	0.033331389	9	82.29468311	-379.127	95.38185455	-336	126.0996401	4	87.02169153	7	114.8036483	16	127.595966	6	109.1710722	110.2652022	16	103.9697618	-290.774	102.6369078	-319	131.9626445	11	109.6062241	6	102.2366507	13	107.6954863	5	97.01798159	113.0870117	21.67507867	7.255053281	5.863004388	22.58453253	-12.56699756	-19.90047966	-12.15309064	2.82180955	4	4
35	f	bachelors degree	27	y	Y	lumosity	lumosity.y	59	20.87083944	21	118.4923683	-261.247	105.3347821	-399	106.4132415	6	93.70903787	7	114.8036483	8	87.11355617	6	109.1710722	108.5674485	19	112.8487574	-414.952	93.01028162	-420	100.6933581	13	116.0032086	6	102.2366507	14	113.8168191	7	121.0680766	114.379004	-5.643610847	-12.3245005	-5.719883392	22.29417074	-12.56699756	26.70326289	11.89700439	5.811555502	2	3
36	NA	NA	19	y	Y	lumosity	lumosity.y	17	4.414152778	21	118.4923683	-446.616	90.32505665	-432	97.8951468	5	90.43034386	5	90.01558593	12	102.1387281	5	97.01798159	96.50302312	15	100.8687377	-433.99	91.42377682	-439	96.43789596	8	100.0782549	6	102.2366507	13	107.6954863	7	121.0680766	104.645504	-17.62363056	1.098720167	-1.457250841	9.647910998	12.22106476	5.556758251	24.05009504	8.142480884	3	2
38	m	advanced degree	39	y	Y	lumosity	lumosity.y	11	2.867482778	12	91.65967918	-353.143	97.57853995	-463	91.33146433	12	112.8487574	6	102.2366507	13	107.6954863	6	109.1710722	102.9858193	20	115.7229157	-479.557	88.6129315	-543	78.02460735	7	96.91529003	7	114.8036483	14	113.8168191	6	109.1710722	103.954327	24.06323654	-8.965608449	-13.30685698	-15.93346741	12.56699756	6.121332753	0	0.968507736	4	4
39	f	hs grad or less	21	y	Y	crosswords	crosswords.y	62	14.54821333	15	100.8687377	-186.398	112.2616031	-334	126.7685565	13	116.0032086	7	114.8036483	14	113.8168191	6	109.1710722	122.5585335	17	106.9689563	-334.177	99.1163312	-355	119.7341376	15	122.4665932	7	114.8036483	17	137.1423714	7	121.0680766	130.0427682	6.100218555	-13.14527186	-7.034418884	6.463384573	0	23.32555234	11.89700439	7.484234696	4	5
40	m	advanced degree	51	o	M	lumosity	lumosity.o	35	12.49284181	13	94.8395275	-574.953	82.2722271	-377	113.0162768	9	103.2905327	6	102.2366507	12	102.1387281	6	109.1710722	101.4780446	17	106.9689563	-408.93	93.36557027	-330	128.4943399	6	93.70903787	6	102.2366507	15	120.1949445	5	97.01798159	110.2040622	12.12942879	11.09334317	15.4780631	-9.581494836	0	18.0562164	-12.15309064	8.726017535	3	4
41	f	some college	55	o	M	lumosity	lumosity.o	44	22.29835931	15	100.8687377	-315.17	100.585194	-313	134.1032486	10	106.4827223	4	78.64839376	13	107.6954863	5	97.01798159	106.1609898	10	85.57372703	-98.626	124.3124216	-401	105.8259904	14	119.1220614	5	90.01558593	15	120.1949445	8	133.0119868	118.7989858	-15.2950107	23.7272276	-28.2772581	12.63933906	11.36719217	12.49945815	35.99400524	12.63799607	1	1
42	f	bachelors degree	30	y	Y	lumosity	lumosity.y	51	11.16916111	23	124.4099523	-85.302	126.860641	-333	127.1431437	14	119.1220614	7	114.8036483	12	102.1387281	8	133.0119868	136.5343323	18	109.8684494	-92.704	124.8254264	-359	118.7337831	10	106.4827223	8	127.5555825	12	102.1387281	6	109.1710722	124.1203866	-14.54150292	-2.035214568	-8.409360564	-12.63933906	12.75193428	0	-23.8409146	-12.41394572	4	5
43	f	bachelors degree	21	y	Y	crosswords	crosswords.y	66	24.19263	10	85.57372703	-711.982	74.10119177	-360	118.4923683	12	112.8487574	6	102.2366507	11	97.4198399	5	97.01798159	96.83150861	10	85.57372703	-192.333	111.5969615	-388	109.6336875	13	116.0032086	7	114.8036483	13	107.6954863	7	121.0680766	115.9834721	0	37.49576972	-8.858680781	3.154451166	12.56699756	10.27564642	24.05009504	19.15196346	3	2
44	m	bachelors degree	29	y	Y	lumosity	lumosity.y	35	7.011512917	16	103.9697618	-533.173	84.62148798	-400	106.1123696	8	100.0782549	5	90.01558593	14	113.8168191	7	121.0680766	104.6025189	18	109.8684494	-172.714	113.5568984	-378	112.741526	4	87.02169153	7	114.8036483	13	107.6954863	6	109.1710722	113.0108477	5.898687608	28.93541041	6.629156371	-13.05656332	24.78806232	-6.121332753	-11.89700439	8.408328789	4	4
45	f	advanced degree	29	y	Y	lumosity	lumosity.y	62	13.02216097	18	109.8684494	-691.102	75.30554858	-493	85.69750507	9	103.2905327	5	90.01558593	15	120.1949445	5	97.01798159	95.34276618	17	106.9689563	-838.98	67.55189703	-436	97.04838168	12	112.8487574	6	102.2366507	13	107.6954863	4	84.66554136	94.81975508	-2.899493105	-7.753651542	11.35087661	9.558224734	12.22106476	-12.49945815	-12.35244023	-0.523011093	3	4
46	f	advanced degree	37	y	Y	crosswords	crosswords.y	58	16.60765306	21	118.4923683	-232.182	106.9689563	-415	102.1086165	13	116.0032086	6	102.2366507	14	113.8168191	6	109.1710722	116.5812465	22	121.4547391	-146.632	117.2932101	-433	97.65778733	14	119.1220614	6	102.2366507	14	113.8168191	4	84.66554136	113.4062158	2.962370769	10.32425382	-4.450829207	3.118852745	0	0	-24.50553087	-3.175030696	2	1
47	f	hs grad or less	19	y	Y	crosswords	crosswords.y	32	9.117437222	24	127.258891	-202.24	110.0356278	-433	97.65778733	12	112.8487574	7	114.8036483	4	75.15990345	7	121.0680766	114.1855098	21	118.4923683	-110.016	122.7097698	-470	89.9830089	10	106.4827223	7	114.8036483	14	113.8168191	6	109.1710722	118.2244304	-8.766522723	12.67414199	-7.674778439	-6.366035154	0	38.65691561	-11.89700439	4.038920576	1	3
48	f	advanced degree	38	y	Y	crosswords	crosswords.y	39	15.53442361	7	75.29108861	-668.548	76.64839816	-403	105.3347821	5	90.43034386	7	114.8036483	11	97.4198399	5	97.01798159	89.42171441	5	67.59046395	-161.339	114.6587923	-479	88.32752517	6	93.70903787	5	90.01558593	6	81.96893327	5	97.01798159	83.62991985	-7.700624661	38.01039415	-17.00725695	3.278694015	-24.78806232	-15.45090663	0	-5.791794564	3	3
49	f	some college	42	y	M	crosswords	crosswords.y	51	13.53634444	21	118.4923683	-380.852	95.32321014	-429	98.58185637	6	93.70903787	6	102.2366507	12	102.1387281	5	97.01798159	101.6204058	23	124.4099523	-217.51	109.1665804	-505	83.69062158	13	116.0032086	7	114.8036483	10	93.4066386	5	97.01798159	109.5194679	5.917584017	13.84337026	-14.89123479	22.29417074	12.56699756	-8.732089463	0	7.899062086	1	1
50	m	bachelors degree	32	y	Y	crosswords	crosswords.y	2	0.2755875	19	112.8487574	-172.743	113.3507497	-412	103.0124308	5	90.43034386	8	127.5555825	13	107.6954863	6	109.1710722	115.4100601	15	100.8687377	-227.431	107.7337662	-413	102.7126304	9	103.2905327	8	127.5555825	11	97.4198399	5	97.01798159	108.9697436	-11.98001971	-5.616983508	-0.299800382	12.86018885	0	-10.27564642	-12.15309064	-6.440316496	3	4
51	f	hs grad or less	44	y	M	lumosity	lumosity.y	50	15.40902722	13	94.8395275	-280.738	103.3554553	-380	112.1319449	6	93.70903787	5	90.01558593	2	66.18670658	5	97.01798159	89.50755308	11	88.54321663	-271.677	104.1862985	-535	79.17886347	7	96.91529003	4	78.64839376	13	107.6954863	6	109.1710722	91.13697227	-6.296310865	0.830843104	-32.95308144	3.206252155	-11.36719217	41.50877973	12.15309064	1.629419197	2	2
52	f	advanced degree	59	o	M	lumosity	lumosity.o	65	12.77642	14	97.84621295	-535.334	84.45668681	-402	105.565664	2	80.40665395	6	102.2366507	11	97.4198399	5	97.01798159	91.27415376	17	106.9689563	-646.036	77.73724256	-468	90.38004825	5	90.43034386	5	90.01558593	14	113.8168191	5	97.01798159	91.59435989	9.122743327	-6.719444246	-15.1856158	10.02368991	-12.22106476	16.39697917	0	0.320206125	4	4
53	f	some college	22	y	Y	lumosity	lumosity.y	26	11.08452375	14	97.84621295	-562.9	82.95075509	-379	112.4394233	13	116.0032086	6	102.2366507	9	90.06668352	6	109.1710722	102.5158906	12	91.65967918	-282.182	103.2714496	-365	116.9642084	13	116.0032086	6	102.2366507	5	78.88184489	7	121.0680766	107.3027902	-6.18653377	20.3206945	4.524785051	0	0	-11.18483862	11.89700439	4.786899613	1	3
54	m	advanced degree	51	o	M	crosswords	crosswords.o	59	14.83565833	12	91.65967918	-408.93	93.36557027	-431	98.13198035	8	100.0782549	4	78.64839376	10	93.4066386	4	84.66554136	85.22059012	12	91.65967918	-285.672	102.9136352	-480	88.08386544	10	106.4827223	5	90.01558593	9	90.06668352	6	109.1710722	94.73264891	0	9.548064963	-10.0481149	6.404467432	11.36719217	-3.339955082	24.50553087	9.512058797	5	5
55	f	some college	43	y	M	crosswords	crosswords.y	68	24.86603917	12	91.65967918	-92.704	124.8254264	-477	88.67744719	7	96.91529003	6	102.2366507	11	97.4198399	6	109.1710722	102.5461292	15	100.8687377	-320.833	100.2608615	-414	102.4290109	8	100.0782549	5	90.01558593	11	97.4198399	5	97.01798159	96.91909597	9.209058542	-24.56456494	13.75156372	3.162964829	-12.22106476	0	-12.15309064	-5.627033267	4	2
56	f	advanced degree	39	y	Y	crosswords	crosswords.y	45	12.69732278	18	109.8684494	-198.579	110.7413789	-412	103.0124308	6	93.70903787	7	114.8036483	12	102.1387281	5	97.01798159	107.5597827	20	115.7229157	-201.849	110.3123492	-398	106.7043604	13	116.0032086	6	102.2366507	10	93.4066386	4	84.66554136	106.9772595	5.854466341	-0.429029692	3.691929644	22.29417074	-12.56699756	-8.732089463	-12.35244023	-0.582523208	4	4
57	f	advanced degree	33	y	Y	lumosity	lumosity.y	65	15.13181903	20	115.7229157	-361.856	96.66746564	-399	106.4132415	8	100.0782549	7	114.8036483	13	107.6954863	4	84.66554136	106.3642791	22	121.4547391	-306.514	101.3844593	-393	108.3012051	9	103.2905327	7	114.8036483	15	120.1949445	5	97.01798159	115.9834721	5.731823328	4.716993672	1.887963585	3.212277852	0	12.49945815	12.35244023	9.619193011	3	2
58	m	some college	20	y	Y	crosswords	crosswords.y	35	3.067761666	15	100.8687377	-394.809	94.23022562	-453	93.3614607	15	122.4665932	7	114.8036483	13	107.6954863	5	97.01798159	107.3994334	15	100.8687377	-303.001	101.5154947	-377	113.0162768	14	119.1220614	7	114.8036483	15	120.1949445	5	97.01798159	115.9834721	0	7.285269046	19.65481613	-3.344531828	0	12.49945815	0	8.58403869	1	2
59	m	advanced degree	42	y	M	crosswords	crosswords.y	50	3.360206389	17	106.9689563	-252.907	105.9185238	-427	99.01925723	6	93.70903787	4	78.64839376	4	75.15990345	5	97.01798159	89.24898791	17	106.9689563	-542.128	84.11479834	-423	99.9031128	8	100.0782549	5	90.01558593	11	97.4198399	5	97.01798159	93.89977533	0	-21.80372547	0.883855574	6.369216984	11.36719217	22.25993644	0	4.650787422	4	5
60	f	advanced degree	26	y	Y	lumosity	lumosity.y	39	10.04673292	13	94.8395275	-270.266	104.3415007	-444	95.25665989	6	93.70903787	7	114.8036483	4	75.15990345	5	97.01798159	93.78220481	11	88.54321663	-223.123	108.2751593	-473	89.38345258	5	90.43034386	7	114.8036483	14	113.8168191	6	109.1710722	103.4166165	-6.296310865	3.933658555	-5.873207303	-3.278694015	0	38.65691561	12.15309064	9.634411648	2	2
61	f	some college	59	o	M	lumosity	lumosity.o	55	11.34222875	14	97.84621295	-139.313	118.7094231	-365	116.9642084	3	83.61639412	4	78.64839376	5	78.88184489	4	84.66554136	89.95971063	13	94.8395275	-445.189	90.57605158	-493	85.69750507	4	87.02169153	4	78.64839376	4	75.15990345	5	97.01798159	78.18679174	-3.006685458	-28.13337156	-31.26670333	3.405297409	0	-3.721941439	12.35244023	-11.77291889	4	5
62	m	bachelors degree	32	y	Y	lumosity	lumosity.y	57	12.65012444	17	106.9689563	-375.285	95.69734278	-554	76.59819309	13	116.0032086	6	102.2366507	14	113.8168191	5	97.01798159	101.8529989	18	109.8684494	-219.511	108.8807824	-373	114.2907573	10	106.4827223	9	140.9426022	15	120.1949445	5	97.01798159	123.7477566	2.899493105	13.18343966	37.69256422	-9.520486319	38.70595156	6.378125399	0	21.89475767	3	4
63	m	bachelors degree	28	y	Y	lumosity	lumosity.y	58	12.61494694	25	129.8784281	-581.303	81.93050052	-364	117.264271	15	122.4665932	5	90.01558593	13	107.6954863	4	84.66554136	108.2794985	26	132.9285386	-264.024	104.8570837	-336	126.0996401	13	116.0032086	6	102.2366507	13	107.6954863	5	97.01798159	121.0880798	3.050110484	22.92658315	8.835369108	-6.463384573	12.22106476	0	12.35244023	12.80858129	4	3
64	m	bachelors degree	42	y	M	lumosity	lumosity.y	58	19.85334236	10	85.57372703	-313.294	100.8500751	-405	104.8688661	8	100.0782549	5	90.01558593	13	107.6954863	5	97.01798159	96.43406287	10	85.57372703	-231.779	107.1855449	-422	100.1304258	4	87.02169153	8	127.5555825	11	97.4198399	6	109.1710722	103.317258	0	6.335469823	-4.738440278	-13.05656332	37.5399966	-10.27564642	12.15309064	6.883195157	4	4
65	f	bachelors degree	26	y	Y	crosswords	crosswords.y	28	7.372464722	8	78.75052699	-435.444	91.20786746	-390	109.1082611	9	103.2905327	6	102.2366507	11	97.4198399	4	84.66554136	91.66837646	10	85.57372703	-583.752	81.64233283	-361	118.2244304	1	77.29023023	6	102.2366507	14	113.8168191	6	109.1710722	96.90387101	6.823200042	-9.565534628	9.116169259	-26.00030248	0	16.39697917	24.50553087	5.235494551	4	3
66	m	advanced degree	24	y	Y	crosswords	crosswords.y	31	8.055836667	14	97.84621295	-219.623	108.7832845	-385	110.621335	3	83.61639412	7	114.8036483	9	90.06668352	5	97.01798159	100.4770602	16	103.9697618	-346.854	98.34210698	-484	87.25312789	1	77.29023023	7	114.8036483	15	120.1949445	6	109.1710722	102.5801601	6.123548824	-10.44117749	-23.36820711	-6.326163892	0	30.12826095	12.15309064	2.103099882	2	4
67	m	some college	25	y	Y	crosswords	crosswords.y	70	30.02854639	7	75.29108861	-442.709	90.78396411	-399	106.4132415	0	70.89374579	6	102.2366507	9	90.06668352	5	97.01798159	83.52815022	9	82.29468311	-419.868	92.43598595	-360	118.4923683	0	70.89374579	6	102.2366507	8	87.11355617	5	97.01798159	87.64970375	7.0035945	1.652021844	12.07912678	0	0	-2.953127341	0	4.12155353	3	5
68	f	advanced degree	32	y	Y	lumosity	lumosity.y	49	9.045593611	7	75.29108861	-719.892	73.90035989	-399	106.4132415	3	83.61639412	5	90.01558593	12	102.1387281	4	84.66554136	79.58145657	11	88.54321663	-469.567	89.27787422	-466	90.74793348	4	87.02169153	6	102.2366507	14	113.8168191	5	97.01798159	92.06121305	13.25212802	15.37751433	-15.66530803	3.405297409	12.22106476	11.678091	12.35244023	12.47975648	2	4
69	m	some college	25	y	Y	crosswords	crosswords.y	3	0.340980833	17	106.9689563	-591.318	81.06126607	-439	96.43789596	12	112.8487574	5	90.01558593	6	81.96893327	6	109.1710722	94.74453743	15	100.8687377	-514.529	85.6150952	-506	83.49405805	12	112.8487574	6	102.2366507	10	93.4066386	4	84.66554136	90.86035335	-6.100218555	4.553829131	-12.94383791	0	12.22106476	11.43770533	-24.50553087	-3.884184079	2	2
70	m	some college	55	o	M	lumosity	lumosity.o	65	13.98269681	17	106.9689563	-164.087	114.426273	-472	89.57882363	10	106.4827223	6	102.2366507	12	102.1387281	6	109.1710722	107.4584102	16	103.9697618	-280.738	103.3554553	-419	100.9770084	13	116.0032086	6	102.2366507	14	113.8168191	0	59.35814637	99.80994827	-2.999194503	-11.07081762	11.39818479	9.520486319	0	11.678091	-49.81292586	-7.648461879	5	4
71	f	bachelors degree	25	y	Y	crosswords	crosswords.y	63	18.32595944	19	112.8487574	-335.954	98.93708578	-410	103.5889406	14	119.1220614	7	114.8036483	16	127.595966	6	109.1710722	120.7821463	20	115.7229157	-227.897	107.3910175	-425	99.46328321	18	131.5085227	7	114.8036483	16	127.595966	6	109.1710722	126.1847187	2.874158287	8.453931698	-4.125657359	12.3864613	0	0	0	5.402572472	2	4
72	f	hs grad or less	58	o	M	lumosity	lumosity.o	59	13.79122264	14	97.84621295	-335.954	98.93708578	-446	94.76830456	11	109.6062241	6	102.2366507	10	93.4066386	5	97.01798159	98.35710309	14	97.84621295	-560.068	83.20424892	-386	110.2934782	9	103.2905327	7	114.8036483	14	113.8168191	5	97.01798159	104.7629314	0	-15.73283686	15.52517363	-6.315691356	12.56699756	20.41018047	0	6.405828349	3	4
73	m	bachelors degree	30	y	Y	crosswords	crosswords.y	49	12.56498778	20	115.7229157	-173.992	113.1470924	-375	113.7372763	1	77.29023023	6	102.2366507	14	113.8168191	7	121.0680766	113.669403	20	115.7229157	-161.339	114.6587923	-385	110.621335	13	116.0032086	6	102.2366507	12	102.1387281	4	84.66554136	111.1057264	0	1.511699912	-3.115941295	38.71297837	0	-11.678091	-36.40253527	-2.563676614	3	3
74	m	advanced degree	35	y	Y	lumosity	lumosity.y	31	13.27121597	19	112.8487574	-227.133	108.0117536	-341	124.5226947	16	125.4160785	4	78.64839376	13	107.6954863	4	84.66554136	110.1712108	20	115.7229157	-50.811	134.2531421	-391	108.8231249	15	122.4665932	6	102.2366507	11	97.4198399	5	97.01798159	118.7500506	2.874158287	26.24138854	-15.69956982	-2.949485361	23.58825693	-10.27564642	12.35244023	8.578839819	1	4
75	f	advanced degree	30	y	Y	lumosity	lumosity.y	54	10.82303542	18	109.8684494	-596.74	80.72579064	-525	80.71727969	0	70.89374579	6	102.2366507	11	97.4198399	5	97.01798159	84.8776602	16	103.9697618	-346.854	98.34210698	-382	111.5668384	7	96.91529003	5	90.01558593	14	113.8168191	6	109.1710722	105.7697744	-5.898687608	17.61631634	30.84955867	26.02154423	-12.22106476	16.39697917	12.15309064	20.89211417	1	4
76	f	advanced degree	52	o	M	lumosity	lumosity.o	68	26.47550583	8	78.75052699	-199.77	110.4544066	-508	83.16233359	5	90.43034386	5	90.01558593	10	93.4066386	5	97.01798159	85.94218526	13	94.8395275	-300.223	101.9018231	-421	100.3950446	8	100.0782549	6	102.2366507	14	113.8168191	5	97.01798159	102.3912627	16.08900051	-8.552583442	17.23271098	9.647910998	12.22106476	20.41018047	0	16.44907746	3	5
77	m	some college	52	o	M	lumosity	lumosity.o	51	11.70704972	14	97.84621295	-598.185	80.62324663	-474	89.17176197	3	83.61639412	4	78.64839376	6	81.96893327	4	84.66554136	75.50562076	14	97.84621295	-320.713	100.3279497	-505	83.69062158	6	93.70903787	0	61.31611067	4	75.15990345	5	97.01798159	78.22961289	0	19.70470311	-5.481140391	10.09264375	-17.33228309	-6.809029814	12.35244023	2.723992135	1	2
78	f	hs grad or less	24	y	Y	lumosity	lumosity.y	67	13.14317431	4	63.24467989	-161.339	114.6587923	-590	72.05241857	6	93.70903787	3	69.29136417	1	58.40134056	3	72.32266178	64.88348279	4	63.24467989	-381.711	95.28015881	-446	94.76830456	3	83.61639412	4	78.64839376	2	66.18670658	3	72.32266178	66.28061181	0	-19.3786335	22.71588599	-10.09264375	9.357029587	7.785366016	0	1.397129025	2	2
79	m	hs grad or less	56	o	M	crosswords	crosswords.o	65	15.4081825	11	88.54321663	-46.462	140.085246	-406	104.6415947	3	83.61639412	6	102.2366507	11	97.4198399	5	97.01798159	103.2066064	10	85.57372703	-422.46	92.19805583	-519	81.68167022	10	106.4827223	6	102.2366507	10	93.4066386	6	109.1710722	92.71398631	-2.969489603	-47.88719015	-22.95992447	22.86632816	0	-4.013201299	12.15309064	-10.49262009	1	1
80	f	bachelors degree	36	y	Y	lumosity	lumosity.y	46	9.628537189	12	91.65967918	-398.125	94.08147619	-400	106.1123696	0	70.89374579	6	102.2366507	10	93.4066386	5	97.01798159	88.89917447	10	85.57372703	-161.339	114.6587923	-512	82.61229025	0	70.89374579	6	102.2366507	9	90.06668352	5	97.01798159	85.90166585	-6.085952157	20.57731612	-23.5000794	0	0	-3.339955082	0	-2.997508619	1	2
81	f	some college	19	y	Y	crosswords	crosswords.y	21	6.279955556	7	75.29108861	-271.795	104.0431346	-455	92.86039548	6	93.70903787	6	102.2366507	12	102.1387281	5	97.01798159	91.82445315	8	78.75052699	-138.833	118.9801506	-376	113.3618283	6	93.70903787	8	127.5555825	15	120.1949445	6	109.1710722	114.8218524	3.459438376	14.93701593	20.50143284	0	25.31893183	18.0562164	12.15309064	22.99739928	1	3
82	f	advanced degree	68	o	O	lumosity	lumosity.o	30	6.347647639	9	82.29468311	-638.911	77.90401886	-434	97.43874756	1	77.29023023	4	78.64839376	10	93.4066386	4	84.66554136	74.23254377	10	85.57372703	-184.226	112.7789827	-527	80.31004621	7	96.91529003	5	90.01558593	9	90.06668352	4	84.66554136	85.27498585	3.279043918	34.87496386	-17.12870135	19.62505979	11.36719217	-3.339955082	0	11.04244208	3	3
83	f	some college	20	y	Y	crosswords	crosswords.y	44	4.8635175	17	106.9689563	-188.541	111.9621709	-398	106.7043604	12	112.8487574	6	102.2366507	8	87.11355617	7	121.0680766	111.6977117	17	106.9689563	-184.97	112.6083954	-390	109.1082611	14	119.1220614	6	102.2366507	11	97.4198399	4	84.66554136	107.7848846	0	0.646224448	2.40390074	6.273303911	0	10.30628372	-36.40253527	-3.912827101	4	3
84	f	advanced degree	32	y	Y	crosswords	crosswords.y	46	13.56717444	6	71.50566007	-430.852	91.75519599	-400	106.1123696	0	70.89374579	6	102.2366507	4	75.15990345	4	84.66554136	76.59819309	11	88.54321663	-724.907	73.62508511	-436	97.04838168	0	70.89374579	5	90.01558593	12	102.1387281	5	97.01798159	80.24814082	17.03755656	-18.13011088	-9.063987967	0	-12.22106476	26.97882461	12.35244023	3.649947734	4	4
85	m	some college	40	y	M	lumosity	lumosity.y	50	10.2327275	14	97.84621295	-370.77	96.09195223	-385	110.621335	6	93.70903787	5	90.01558593	14	113.8168191	4	84.66554136	96.59485554	14	97.84621295	-172.743	113.3507497	-348	122.2515532	6	93.70903787	6	102.2366507	14	113.8168191	5	97.01798159	109.8684494	0	17.2587975	11.63021822	0	12.22106476	0	12.35244023	13.27359384	3	4
86	f	advanced degree	32	y	Y	lumosity	lumosity.y	48	70.07856931	12	91.65967918	-260.226	105.4580238	-354	120.0483363	4	87.02169153	6	102.2366507	14	113.8168191	5	97.01798159	103.9967827	15	100.8687377	-470.834	89.2248855	-360	118.4923683	4	87.02169153	6	102.2366507	13	107.6954863	7	121.0680766	106.5072781	9.209058542	-16.2331383	-1.555967981	0	0	-6.121332753	24.05009504	2.510495342	3	3
87	f	advanced degree	37	y	Y	crosswords	crosswords.y	64	16.08609222	21	118.4923683	-268.303	104.4698927	-357	119.1978885	12	112.8487574	7	114.8036483	15	120.1949445	5	97.01798159	121.0980955	18	109.8684494	-138.833	118.9801506	-346	122.8514513	16	125.4160785	7	114.8036483	16	127.595966	6	109.1710722	131.9988155	-8.6239189	14.51025785	3.653562827	12.5673211	0	7.40102151	12.15309064	10.90072005	4	5
88	m	bachelors degree	74	o	O	lumosity	lumosity.o	23	5.659975	7	75.29108861	-518.261	85.37121426	-539	78.62784794	0	70.89374579	5	90.01558593	10	93.4066386	3	72.32266178	68.65870631	6	71.50566007	-802.283	69.19990452	-719	61.5197789	0	70.89374579	5	90.01558593	6	81.96893327	4	84.66554136	61.31611067	-3.785428537	-16.17130974	-17.10806904	0	0	-11.43770533	12.34287958	-7.342595642	1	1
89	f	some college	29	y	Y	crosswords	crosswords.y	14	3.675311389	9	82.29468311	-471.676	89.17659699	-522	81.27434236	7	96.91529003	6	102.2366507	13	107.6954863	6	109.1710722	92.09120352	13	94.8395275	-227.897	107.3910175	-460	91.91078039	9	103.2905327	5	90.01558593	9	90.06668352	4	84.66554136	90.58059058	12.54484439	18.21442049	10.63643804	6.375242681	-12.22106476	-17.6288028	-24.50553087	-1.510612941	2	2
90	m	advanced degree	22	y	Y	lumosity	lumosity.y	57	27.33137611	14	97.84621295	-604.432	80.39790499	-452	93.53363859	5	90.43034386	5	90.01558593	13	107.6954863	5	97.01798159	89.40259212	12	91.65967918	-667.065	76.84664806	-441	95.98777089	6	93.70903787	5	90.01558593	11	97.4198399	5	97.01798159	85.84360186	-6.18653377	-3.551256931	2.454132294	3.278694015	0	-10.27564642	0	-3.558990259	5	5
92	f	hs grad or less	42	y	M	lumosity	lumosity.y	64	18.65774611	14	97.84621295	-235.35	106.7661851	-391	108.8231249	12	112.8487574	6	102.2366507	14	113.8168191	5	97.01798159	109.6703558	12	91.65967918	-302.914	101.6503948	-313	134.1032486	7	96.91529003	5	90.01558593	5	78.88184489	5	97.01798159	97.4198399	-6.18653377	-5.115790363	25.28012362	-15.93346741	-12.22106476	-34.93497417	0	-12.25051586	4	4
93	f	hs grad or less	47	y	M	lumosity	lumosity.y	46	17.70379	6	71.50566007	-616.617	79.50590633	-425	99.46328321	5	90.43034386	6	102.2366507	11	97.4198399	3	72.32266178	79.02147747	5	67.59046395	-509.644	85.93640305	-462	91.5288808	5	90.43034386	7	114.8036483	9	90.06668352	4	84.66554136	81.65021041	-3.915196125	6.430496722	-7.934402408	0	12.56699756	-7.353156381	12.34287958	2.628732933	1	4
94	m	hs grad or less	22	y	Y	crosswords	crosswords.y	0	0.24133	6	71.50566007	-352.224	97.77088515	-547	77.5219604	0	70.89374579	5	90.01558593	9	90.06668352	4	84.66554136	72.66303286	10	85.57372703	-628.847	78.75052699	-458	92.30876391	6	93.70903787	6	102.2366507	8	87.11355617	4	84.66554136	81.55534319	14.06806695	-19.02035816	14.78680352	22.81529208	12.22106476	-2.953127341	0	8.892310329	3	3
95	f	advanced degree	31	y	Y	lumosity	lumosity.y	46	9.540677361	7	75.29108861	-610.61	79.9243206	-414	102.4290109	7	96.91529003	5	90.01558593	14	113.8168191	5	97.01798159	88.90897258	10	85.57372703	-574.586	82.35437266	-404	105.1012089	7	96.91529003	5	90.01558593	15	120.1949445	6	109.1710722	97.18503406	10.28263842	2.430052061	2.672197955	0	0	6.378125399	12.15309064	8.27606148	2	1
96	f	NA	22	y	Y	crosswords	crosswords.y	57	8.802970555	9	82.29468311	-521.675	85.22059012	-452	93.53363859	6	93.70903787	4	78.64839376	8	87.11355617	4	84.66554136	77.37195089	9	82.29468311	-408.93	93.36557027	-471	89.77714362	4	87.02169153	6	102.2366507	11	97.4198399	5	97.01798159	87.25847398	0	8.144980151	-3.75649497	-6.687346339	23.58825693	10.30628372	12.35244023	9.886523092	2	4
97	f	advanced degree	33	y	Y	lumosity	lumosity.y	38	7.707390556	16	103.9697618	-615.08	79.61903821	-433	97.65778733	14	119.1220614	5	90.01558593	13	107.6954863	6	109.1710722	101.5154947	17	106.9689563	-193.626	111.4019867	-386	110.2934782	13	116.0032086	6	102.2366507	13	107.6954863	5	97.01798159	112.371228	2.999194503	31.78294845	12.63569085	-3.118852745	12.22106476	0	-12.15309064	10.85573335	4	4
98	f	advanced degree	65	o	O	lumosity	lumosity.o	25	5.814610139	16	103.9697618	-540.494	84.14740401	-509	83.02872605	3	83.61639412	5	90.01558593	11	97.4198399	4	84.66554136	82.18200311	11	88.54321663	-444.934	90.72087544	-670	65.27542145	0	70.89374579	5	90.01558593	10	93.4066386	3	72.32266178	70.22917154	-15.42654515	6.573471434	-17.7533046	-12.72264833	0	-4.013201299	-12.34287958	-11.95283156	3	2
99	m	NA	32	y	Y	lumosity	lumosity.y	59	22.8987633	23	124.4099523	-353.143	97.57853995	-291	144.5573655	4	87.02169153	7	114.8036483	12	102.1387281	5	97.01798159	116.3903737	23	124.4099523	-101.001	123.7738898	-326	129.5341804	8	100.0782549	7	114.8036483	14	113.8168191	5	97.01798159	125.4631761	0	26.19534984	-15.0231851	13.05656332	0	11.678091	0	9.072802368	4	4
100	m	hs grad or less	73	o	O	lumosity	lumosity.o	52	16.85626042	12	91.65967918	-681.868	75.81148404	-535	79.17886347	7	96.91529003	6	102.2366507	8	87.11355617	5	97.01798159	82.92941018	12	91.65967918	-188.541	111.9621709	-495	85.37121426	6	93.70903787	5	90.01558593	12	102.1387281	4	84.66554136	90.02023595	0	36.15068689	6.192350797	-3.206252155	-12.22106476	15.02517189	-12.35244023	7.090825769	4	4
101	m	bachelors degree	38	y	Y	lumosity	lumosity.y	14	2.486715417	17	106.9689563	-290.774	102.6369078	-528	80.07839292	3	83.61639412	6	102.2366507	6	81.96893327	5	97.01798159	88.71209978	22	121.4547391	-417.48	92.67622633	-416	101.8154552	3	83.61639412	6	102.2366507	9	90.06668352	5	97.01798159	97.07117379	14.48578277	-9.960681503	21.73706231	0	0	8.097750249	0	8.359074015	3	5
102	f	advanced degree	28	y	Y	lumosity	lumosity.y	9	2.62602125	16	103.9697618	-157.895	115.4290217	-389	109.3559537	10	106.4827223	6	102.2366507	14	113.8168191	5	97.01798159	111.5668384	12	91.65967918	-321.254	100.1527852	-458	92.30876391	11	109.6062241	6	102.2366507	9	90.06668352	7	121.0680766	101.4967685	-12.31008259	-15.27623649	-17.04718975	3.123501776	0	-23.75013555	24.05009504	-10.07006987	2	3
103	f	NA	51	o	M	crosswords	crosswords.o	54	15.38203222	7	75.29108861	-259.836	105.5696562	-369	115.5624496	0	70.89374579	6	102.2366507	14	113.8168191	6	109.1710722	98.07187858	8	78.75052699	-483.683	88.25677819	-347	122.5816515	2	80.40665395	6	102.2366507	15	120.1949445	7	121.0680766	103.1799237	3.459438376	-17.312878	7.019201905	9.512908155	0	6.378125399	11.89700439	5.108045152	2	2
104	m	bachelors degree	32	y	Y	lumosity	lumosity.y	60	12.50334042	15	100.8687377	-447.082	90.26073496	-376	113.3618283	9	103.2905327	5	90.01558593	13	107.6954863	5	97.01798159	100.4025	15	100.8687377	-442.184	90.83791061	-426	99.23202524	9	103.2905327	6	102.2366507	11	97.4198399	5	97.01798159	97.58609019	0	0.577175646	-14.12980308	0	12.22106476	-10.27564642	0	-2.816409817	5	5
105	m	some college	32	y	Y	lumosity	lumosity.y	29	10.83392444	7	75.29108861	-219.623	108.7832845	-370	115.2217812	5	90.43034386	6	102.2366507	4	75.15990345	6	109.1710722	94.16195262	11	88.54321663	-307.241	101.2049233	-517	82.00724801	10	106.4827223	6	102.2366507	9	90.06668352	5	97.01798159	91.86333375	13.25212802	-7.578361164	-33.21453324	16.05237843	0	14.90678006	-12.15309064	-2.298618872	4	3
106	f	advanced degree	52	o	M	crosswords	crosswords.o	60	15.10219944	19	112.8487574	-296.854	102.11238	-453	93.3614607	17	128.2711147	6	102.2366507	9	90.06668352	5	97.01798159	106.3072417	18	109.8684494	-381.711	95.28015881	-429	98.58185637	15	122.4665932	5	90.01558593	11	97.4198399	6	109.1710722	105.4421011	-2.980308053	-6.832221209	5.220395668	-5.80452153	-12.22106476	7.353156381	12.15309064	-0.865140635	3	4
107	f	advanced degree	35	y	Y	crosswords	crosswords.y	45	13.11773361	9	82.29468311	-227.897	107.3910175	-366	116.6156143	4	87.02169153	5	90.01558593	11	97.4198399	4	84.66554136	91.41499919	13	94.8395275	-161.339	114.6587923	-413	102.7126304	3	83.61639412	6	102.2366507	14	113.8168191	6	109.1710722	104.9356901	12.54484439	7.267774829	-13.90298394	-3.405297409	12.22106476	16.39697917	24.50553087	13.52069096	4	4
108	m	hs grad or less	50	o	M	crosswords	crosswords.o	46	13.77696222	24	127.258891	-207.255	109.8407057	-352	120.8211365	4	87.02169153	6	102.2366507	8	87.11355617	4	84.66554136	104.3920409	23	124.4099523	-22.387	143.4567396	-415	102.1086165	6	93.70903787	6	102.2366507	15	120.1949445	5	97.01798159	120.1305667	-2.848938706	33.61603394	-18.71251999	6.687346339	0	33.08138829	12.35244023	15.73852579	3	4
109	f	hs grad or less	25	y	Y	lumosity	lumosity.y	39	18.66976722	15	100.8687377	-320.833	100.2608615	-400	106.1123696	11	109.6062241	7	114.8036483	10	93.4066386	5	97.01798159	105.215858	24	127.258891	-427.878	91.89784845	-368	115.9178826	9	103.2905327	8	127.5555825	8	87.11355617	5	97.01798159	112.0288676	26.39015328	-8.363013037	9.80551291	-6.315691356	12.75193428	-6.293082423	0	6.813009588	4	3
110	m	advanced degree	40	y	M	lumosity	lumosity.y	48	9.206816667	4	63.24467989	-116.367	121.4754877	-474	89.17176197	4	87.02169153	6	102.2366507	12	102.1387281	5	97.01798159	90.61233946	11	88.54321663	-357.241	97.17365544	-501	84.4055999	8	100.0782549	5	90.01558593	9	90.06668352	4	84.66554136	84.12132548	25.29853674	-24.30183229	-4.766162074	13.05656332	-12.22106476	-12.07204455	-12.35244023	-6.491013981	1	4
111	m	some college	40	y	M	lumosity	lumosity.y	49	10.03876944	19	112.8487574	-274.828	103.7079275	-392	108.5586767	13	116.0032086	8	127.5555825	13	107.6954863	7	121.0680766	123.6568535	18	109.8684494	-202.24	110.0356278	-389	109.3559537	9	103.2905327	8	127.5555825	12	102.1387281	7	121.0680766	120.2041717	-2.980308053	6.327700271	0.797276942	-12.7126759	0	-5.556758251	0	-3.452681761	4	5
112	f	bachelors degree	24	y	Y	lumosity	lumosity.y	13	2.778091528	20	115.7229157	-353.143	97.57853995	-358	118.9387339	18	131.5085227	6	102.2366507	11	97.4198399	5	97.01798159	114.5033921	24	127.258891	-85.302	126.860641	-373	114.2907573	17	128.2711147	6	102.2366507	12	102.1387281	6	109.1710722	127.2783408	11.53597528	29.28210105	-4.647976616	-3.237407947	0	4.718888164	12.15309064	12.77494869	3	3
113	f	advanced degree	74	o	O	lumosity	lumosity.o	7	1.191550833	10	85.57372703	-583.752	81.64233283	-673	64.99792093	9	103.2905327	6	102.2366507	8	87.11355617	6	109.1710722	83.85120172	10	85.57372703	-334.177	99.1163312	-461	91.72050148	6	93.70903787	5	90.01558593	12	102.1387281	5	97.01798159	89.95504807	0	17.47399837	26.72258054	-9.581494836	-12.22106476	15.02517189	-12.15309064	6.10384635	2	2
114	f	some college	52	o	M	lumosity	lumosity.o	19	4.850394861	17	106.9689563	-523.727	85.14167358	-400	106.1123696	4	87.02169153	5	90.01558593	12	102.1387281	5	97.01798159	93.64387475	16	103.9697618	-331.264	99.38870045	-405	104.8688661	5	90.43034386	6	102.2366507	4	75.15990345	4	84.66554136	90.26073496	-2.999194503	14.24702687	-1.243503559	3.408652324	12.22106476	-26.97882461	-12.35244023	-3.383139787	4	1
115	m	bachelors degree	22	y	Y	lumosity	lumosity.y	67	14.59212167	20	115.7229157	-290.774	102.6369078	-410	103.5889406	4	87.02169153	5	90.01558593	17	137.1423714	5	97.01798159	108.0806016	21	118.4923683	-116.13	121.7917755	-377	113.0162768	6	93.70903787	7	114.8036483	14	113.8168191	6	109.1710722	120.5035741	2.76945256	19.15486765	9.427336262	6.687346339	24.78806232	-23.32555234	12.15309064	12.42297242	3	4
116	m	advanced degree	29	y	Y	crosswords	crosswords.y	62	3.462425834	15	100.8687377	-479.557	88.6129315	-533	79.43937075	4	87.02169153	4	78.64839376	11	97.4198399	5	97.01798159	82.67052526	11	88.54321663	-371.281	96.02637887	-391	108.8231249	6	93.70903787	5	90.01558593	9	90.06668352	5	97.01798159	91.08367074	-12.3255211	7.413447376	29.38375417	6.687346339	11.36719217	-7.353156381	0	8.413145478	4	4
117	f	advanced degree	26	y	Y	crosswords	crosswords.y	31	5.750036389	19	112.8487574	-159.167	115.2654979	-447	94.56585795	11	109.6062241	5	90.01558593	10	93.4066386	5	97.01798159	103.0162332	12	91.65967918	-146.726	117.0137466	-429	98.58185637	13	116.0032086	6	102.2366507	8	87.11355617	6	109.1710722	105.1565191	-21.18907826	1.748248691	4.015998423	6.396984543	12.22106476	-6.293082423	12.15309064	2.140285931	4	2
118	m	bachelors degree	32	y	Y	lumosity	lumosity.y	55	10.79507042	11	88.54321663	-384.842	94.98950798	-490	86.22868137	6	93.70903787	6	102.2366507	15	120.1949445	5	97.01798159	95.65461332	16	103.9697618	-378.987	95.4560364	-452	93.53363859	6	93.70903787	7	114.8036483	14	113.8168191	6	109.1710722	105.8983888	15.42654515	0.466528427	7.304957228	0	12.56699756	-6.378125399	12.15309064	10.2437755	3	4
119	f	bachelors degree	44	y	M	lumosity	lumosity.y	67	14.70645181	7	75.29108861	-256.134	105.6936104	-352	120.8211365	12	112.8487574	7	114.8036483	7	84.57097827	5	97.01798159	102.5839421	20	115.7229157	-482.726	88.35776591	-371	114.870504	14	119.1220614	7	114.8036483	6	81.96893327	7	121.0680766	113.306508	40.43182712	-17.33584447	-5.95063258	6.273303911	0	-2.602045007	24.05009504	10.72256587	3	2
120	m	some college	67	o	O	lumosity	lumosity.o	20	3.200538194	12	91.65967918	-479.557	88.6129315	-332	127.6365504	7	96.91529003	5	90.01558593	11	97.4198399	4	84.66554136	94.34641693	13	94.8395275	-472.08	89.08453823	-404	105.1012089	4	87.02169153	5	90.01558593	8	87.11355617	4	84.66554136	84.67182391	3.179848312	0.471606729	-22.53534156	-9.893598494	0	-10.30628372	0	-9.674593023	4	4
121	m	advanced degree	64	o	M	lumosity	lumosity.o	37	10.72249431	20	115.7229157	-701.489	74.76984978	-421	100.3950446	12	112.8487574	3	69.29136417	10	93.4066386	4	84.66554136	87.8007466	21	118.4923683	-189.556	111.7280398	-406	104.6415947	0	70.89374579	5	90.01558593	13	107.6954863	3	72.32266178	93.99679214	2.76945256	36.95819001	4.246550124	-41.95501165	20.72422176	14.28884771	-12.34287958	6.19604554	4	3
122	f	advanced degree	39	y	Y	lumosity	lumosity.y	43	11.41619014	12	91.65967918	-447.592	90.1823884	-544	77.83763691	5	90.43034386	5	90.01558593	13	107.6954863	4	84.66554136	83.5008833	15	100.8687377	-327.397	99.61613842	-405	104.8688661	8	100.0782549	5	90.01558593	12	102.1387281	5	97.01798159	98.59308526	9.209058542	9.433750011	27.03122918	9.647910998	0	-5.556758251	12.35244023	15.09220196	4	4
123	f	advanced degree	25	y	Y	lumosity	lumosity.y	25	4.914661944	15	100.8687377	-567.243	82.53178657	-390	109.1082611	7	96.91529003	5	90.01558593	12	102.1387281	4	84.66554136	91.57255138	19	112.8487574	-542.128	84.11479834	-424	99.68323205	5	90.43034386	5	90.01558593	13	107.6954863	5	97.01798159	95.42481559	11.98001971	1.58301177	-9.425029087	-6.484946169	0	5.556758251	12.35244023	3.852264211	2	5
124	m	bachelors degree	23	y	Y	lumosity	lumosity.y	32	7.296325972	18	109.8684494	-123.177	119.5322891	-336	126.0996401	15	122.4665932	6	102.2366507	13	107.6954863	6	109.1710722	123.5540168	22	121.4547391	-161.339	114.6587923	-359	118.7337831	5	90.43034386	7	114.8036483	14	113.8168191	6	109.1710722	120.1305667	11.58628967	-4.873496825	-7.365856991	-32.03624932	12.56699756	6.121332753	0	-3.423450139	2	3
125	f	some college	56	o	M	crosswords	crosswords.o	44	11.59241194	13	94.8395275	-581.303	81.93050052	-580	73.6425515	3	83.61639412	4	78.64839376	9	90.06668352	3	72.32266178	71.11103417	7	75.29108861	-361.676	96.78195507	-631	67.92827912	0	70.89374579	6	102.2366507	5	78.88184489	4	84.66554136	71.55081121	-19.54843889	14.85145456	-5.714272373	-12.72264833	23.58825693	-11.18483862	12.34287958	0.439777033	3	2
126	m	some college	24	y	Y	crosswords	crosswords.y	51	9.791939167	16	103.9697618	-116.367	121.4754877	-394	107.9902732	10	106.4827223	7	114.8036483	5	78.88184489	8	133.0119868	116.042765	13	94.8395275	-120.493	120.3248281	-447	94.56585795	16	125.4160785	8	127.5555825	15	120.1949445	6	109.1710722	122.3641591	-9.130234283	-1.15065967	-13.42441525	18.93335625	12.75193428	41.31309957	-23.8409146	6.321394058	2	3
127	f	bachelors degree	54	o	M	lumosity	lumosity.o	49	14.25612747	11	88.54321663	-196.785	110.9300349	-460	91.91078039	9	103.2905327	6	102.2366507	13	107.6954863	5	97.01798159	100.2012319	13	94.8395275	-457.358	89.59778938	-504	83.87778557	8	100.0782549	7	114.8036483	15	120.1949445	6	109.1710722	102.9896203	6.296310865	-21.33224555	-8.032994819	-3.212277852	12.56699756	12.49945815	12.15309064	2.788388449	3	2
128	m	bachelors degree	34	y	Y	lumosity	lumosity.y	9	1.369527629	9	82.29468311	-218.239	109.0009546	-372	114.5570077	5	90.43034386	6	102.2366507	12	102.1387281	5	97.01798159	99.32902345	11	88.54321663	-280.738	103.3554553	-363	117.5640076	7	96.91529003	6	102.2366507	9	90.06668352	6	109.1710722	101.7366502	6.248533522	-5.645499206	3.006999909	6.484946169	0	-12.07204455	12.15309064	2.407626729	3	2
129	m	advanced degree	38	y	Y	lumosity	lumosity.y	61	14.00267875	17	106.9689563	-224.829	108.1712241	-399	106.4132415	14	119.1220614	5	90.01558593	11	97.4198399	4	84.66554136	103.0238386	21	118.4923683	-84.028	128.9367294	-400	106.1123696	12	112.8487574	6	102.2366507	12	102.1387281	4	84.66554136	113.1964066	11.52341201	20.7655053	-0.300871862	-6.273303911	12.22106476	4.718888164	0	10.17256807	4	5
131	m	advanced degree	56	o	M	lumosity	lumosity.o	50	12.15513056	13	94.8395275	-282.182	103.2714496	-385	110.621335	8	100.0782549	5	90.01558593	12	102.1387281	5	97.01798159	99.41853526	13	94.8395275	-196.107	111.1253416	-502	84.21887411	16	125.4160785	6	102.2366507	13	107.6954863	6	109.1710722	108.4929814	0	7.853891983	-26.40246089	25.33782368	12.22106476	5.556758251	12.15309064	9.074446155	4	4
132	f	some college	19	y	Y	lumosity	lumosity.y	65	20.89523444	26	132.9285386	-261.247	105.3347821	-391	108.8231249	8	100.0782549	6	102.2366507	9	90.06668352	5	97.01798159	108.9563794	26	132.9285386	-489.944	87.893878	-396	107.3069857	13	116.0032086	7	114.8036483	12	102.1387281	5	97.01798159	113.9943478	0	-17.44090412	-1.516139188	15.92495375	12.56699756	12.07204455	0	5.037968414	2	2
133	m	advanced degree	61	o	M	lumosity	lumosity.o	70	14.50116056	17	106.9689563	-494.911	87.38099079	-479	88.32752517	10	106.4827223	4	78.64839376	12	102.1387281	3	72.32266178	85.67400352	16	103.9697618	-398.85	93.98871705	-454	93.12637837	5	90.43034386	5	90.01558593	8	87.11355617	3	72.32266178	83.19029172	-2.999194503	6.607726259	4.798853191	-16.05237843	11.36719217	-15.02517189	0	-2.483711796	4	1
135	m	bachelors degree	67	o	O	lumosity	lumosity.o	62	14.79960056	21	118.4923683	-192.333	111.5969615	-529	79.91519138	16	125.4160785	6	102.2366507	10	93.4066386	6	109.1710722	109.8730766	23	124.4099523	-227.133	108.0117536	-405	104.8688661	14	119.1220614	5	90.01558593	15	120.1949445	5	97.01798159	115.2905371	5.917584017	-3.585207902	24.9536747	-6.294017188	-12.22106476	26.78830587	-12.15309064	5.417460506	5	4
136	m	bachelors degree	21	y	Y	crosswords	crosswords.y	2	0.190304444	16	103.9697618	-221.969	108.4449083	-419	100.9770084	6	93.70903787	6	102.2366507	15	120.1949445	8	133.0119868	114.9989649	15	100.8687377	-346.854	98.34210698	-435	97.25327203	5	90.43034386	8	127.5555825	9	90.06668352	6	109.1710722	103.2332992	-3.101024052	-10.10280128	-3.72373639	-3.278694015	25.31893183	-30.12826095	-23.8409146	-11.76566567	1	4
137	f	some college	52	o	M	lumosity	lumosity.o	67	36.91627833	16	103.9697618	-607.204	80.22150667	-581	73.46625424	4	87.02169153	5	90.01558593	13	107.6954863	3	72.32266178	79.41073128	17	106.9689563	-361.676	96.78195507	-644	67.07146141	10	106.4827223	6	102.2366507	14	113.8168191	5	97.01798159	97.45009021	2.999194503	16.5604484	-6.394792824	19.46103075	12.22106476	6.121332753	24.69531981	18.03935893	4	4
138	m	bachelors degree	21	y	Y	crosswords	crosswords.y	30	5.708605833	21	118.4923683	-161.339	114.6587923	-400	106.1123696	7	96.91529003	5	90.01558593	2	66.18670658	6	109.1710722	100.1714184	12	91.65967918	-153.546	116.5401196	-443	95.50283079	12	112.8487574	7	114.8036483	9	90.06668352	4	84.66554136	101.2647482	-26.8326891	1.881327291	-10.60953886	15.93346741	24.78806232	23.87997694	-24.50553087	1.093329844	3	3
139	f	some college	22	y	Y	crosswords	crosswords.y	34	8.649408889	23	124.4099523	-331.313	99.35140352	-357	119.1978885	8	100.0782549	0	61.31611067	14	113.8168191	4	84.66554136	100.5218019	19	112.8487574	-271.844	103.8502509	-420	100.6933581	16	125.4160785	6	102.2366507	8	87.11355617	0	59.35814637	97.75204449	-11.56119486	4.498847405	-18.50453034	25.33782368	40.92054002	-26.70326289	-25.30739499	-2.769757404	1	3
140	m	bachelors degree	62	o	M	lumosity	lumosity.o	66	42.03550361	14	97.84621295	-474.432	88.90897258	-534	79.29541578	5	90.43034386	5	90.01558593	11	97.4198399	5	97.01798159	85.35321735	17	106.9689563	-479.649	88.50326827	-473	89.38345258	8	100.0782549	6	102.2366507	10	93.4066386	4	84.66554136	91.34907288	9.122743327	-0.405704315	10.08803681	9.647910998	12.22106476	-4.013201299	-12.35244023	5.99585553	4	4
141	f	some college	58	o	M	crosswords	crosswords.o	60	26.05373083	15	100.8687377	-184.97	112.6083954	-584	72.91412906	0	70.89374579	4	78.64839376	4	75.15990345	5	97.01798159	77.93704818	14	97.84621295	-392.261	94.40238768	-443	95.50283079	0	70.89374579	5	90.01558593	11	97.4198399	6	109.1710722	88.87465842	-3.022524772	-18.2060077	22.58870173	0	11.36719217	22.25993644	12.15309064	10.93761025	4	NA
142	m	bachelors degree	25	y	Y	crosswords	crosswords.y	50	11.51812583	16	103.9697618	-159.167	115.2654979	-344	123.4396335	14	119.1220614	6	102.2366507	5	78.88184489	5	97.01798159	109.8268464	16	103.9697618	-161.339	114.6587923	-373	114.2907573	14	119.1220614	4	78.64839376	12	102.1387281	5	97.01798159	107.2357387	0	-0.606705573	-9.148876163	0	-23.58825693	23.25688317	0	-2.591107701	4	4
143	f	bachelors degree	28	y	Y	crosswords	crosswords.y	50	10.50886056	15	100.8687377	-296.854	102.11238	-462	91.5288808	12	112.8487574	6	102.2366507	8	87.11355617	5	97.01798159	98.3271092	15	100.8687377	-154.501	116.3565677	-521	81.40360985	5	90.43034386	6	102.2366507	11	97.4198399	6	109.1710722	99.39242993	0	14.24418771	-10.12527095	-22.41841358	0	10.30628372	12.15309064	1.065320726	2	2
144	f	advanced degree	45	y	M	lumosity	lumosity.y	37	7.0355725	23	124.4099523	-164.372	114.2088377	-403	105.3347821	17	128.2711147	8	127.5555825	10	93.4066386	6	109.1710722	125.1995363	20	115.7229157	-307.241	101.2049233	-441	95.98777089	8	100.0782549	6	102.2366507	11	97.4198399	6	109.1710722	105.1644263	-8.687036577	-13.00391439	-9.347011232	-28.19285985	-25.31893183	4.013201299	0	-20.03511007	3	1
145	m	bachelors degree	50	o	M	lumosity	lumosity.o	47	11.26583444	7	75.29108861	-761.713	71.55081121	-458	92.30876391	2	80.40665395	6	102.2366507	7	84.57097827	5	97.01798159	76.82208758	9	82.29468311	-459.105	89.50279329	-418	101.2497901	6	93.70903787	6	102.2366507	13	107.6954863	5	97.01798159	93.47634169	7.0035945	17.95198209	8.941026209	13.30238392	0	23.12450804	0	16.65425411	2	NA
146	f	advanced degree	56	o	M	crosswords	crosswords.o	61	18.9380875	20	115.7229157	-199.77	110.4544066	-349	121.8885759	12	112.8487574	5	90.01558593	11	97.4198399	6	109.1710722	113.828214	18	109.8684494	-216.89	109.3062128	-425	99.46328321	10	106.4827223	6	102.2366507	14	113.8168191	6	109.1710722	112.0700301	-5.854466341	-1.148193766	-22.42529272	-6.366035154	12.22106476	16.39697917	0	-1.758183955	4	4
147	m	bachelors degree	65	o	O	crosswords	crosswords.o	52	18.88858333	11	88.54321663	-555.775	83.35682848	-457	92.49939293	6	93.70903787	5	90.01558593	4	75.15990345	5	97.01798159	80.4328609	12	91.65967918	-433.99	91.42377682	-399	106.4132415	10	106.4827223	5	90.01558593	4	75.15990345	4	84.66554136	86.56041646	3.116462554	8.066948345	13.91384858	12.77368442	0	0	-12.35244023	6.127555555	3	2
148	m	advanced degree	51	o	M	lumosity	lumosity.o	69	20.61791014	21	118.4923683	-331.313	99.35140352	-448	94.35441755	6	93.70903787	7	114.8036483	12	102.1387281	7	121.0680766	110.6548784	27	136.391296	-352.548	97.67664605	-419	100.9770084	11	109.6062241	7	114.8036483	16	127.595966	7	121.0680766	126.860641	17.89892769	-1.67475747	6.62259087	15.89718619	0	25.45723791	0	16.20576255	2	3
149	m	bachelors degree	26	y	Y	crosswords	crosswords.y	50	11.67696611	17	106.9689563	-170.2	113.9540899	-385	110.621335	11	109.6062241	6	102.2366507	16	127.595966	5	97.01798159	116.4718498	16	103.9697618	-155.402	115.9571997	-398	106.7043604	11	109.6062241	5	90.01558593	14	113.8168191	5	97.01798159	109.1306753	-2.999194503	2.00310978	-3.916974603	0	-12.22106476	-13.77914691	0	-7.341174494	3	4
150	f	some college	40	y	M	crosswords	crosswords.y	58	29.97296111	7	75.29108861	-469.567	89.27787422	-428	98.81002988	6	93.70903787	5	90.01558593	6	81.96893327	5	97.01798159	81.96893327	9	82.29468311	-415.692	92.91460252	-440	96.21518319	8	100.0782549	5	90.01558593	5	78.88184489	5	97.01798159	84.60887691	7.0035945	3.636728303	-2.594846694	6.369216984	0	-3.087088375	0	2.639943646	4	1
151	m	advanced degree	26	y	Y	crosswords	crosswords.y	16	3.0959275	8	78.75052699	-356.836	97.35552297	-375	113.7372763	5	90.43034386	6	102.2366507	5	78.88184489	5	97.01798159	89.80063388	7	75.29108861	-387.938	94.78810047	-393	108.3012051	7	96.91529003	5	90.01558593	12	102.1387281	6	109.1710722	94.24627245	-3.459438376	-2.567422491	-5.436071202	6.484946169	-12.22106476	23.25688317	12.15309064	4.445638567	2	4
152	f	some college	27	y	Y	lumosity	lumosity.y	19	4.127567822	18	109.8684494	-346.854	98.34210698	-423	99.9031128	14	119.1220614	6	102.2366507	9	90.06668352	4	84.66554136	100.8052901	21	118.4923683	-161.009	114.9928228	-383	111.3076943	16	125.4160785	5	90.01558593	8	87.11355617	4	84.66554136	107.7507957	8.6239189	16.65071578	11.40458151	6.294017188	-12.22106476	-2.953127341	0	6.945505588	2	2
153	m	some college	49	y	M	lumosity	lumosity.y	52	16.74608319	11	88.54321663	-142.668	117.9393078	-364	117.264271	5	90.43034386	6	102.2366507	7	84.57097827	6	109.1710722	102.364848	12	91.65967918	-82.213	129.8513839	-413	102.7126304	13	116.0032086	4	78.64839376	14	113.8168191	5	97.01798159	107.1688315	3.116462554	11.91207618	-14.55164063	25.57286475	-23.58825693	29.24584079	-12.15309064	4.803983532	3	2
154	m	NA	23	y	Y	lumosity	lumosity.y	36	23.6432525	19	112.8487574	-356.836	97.35552297	-302	138.1874229	8	100.0782549	8	127.5555825	16	127.595966	7	121.0680766	130.7694817	18	109.8684494	-142.668	117.9393078	-356	119.4715541	15	122.4665932	9	140.9426022	16	127.595966	9	144.874283	148.6215221	-2.980308053	20.58378479	-18.71586874	22.38833832	13.38701972	0	23.80620642	17.8520404	2	5
155	m	bachelors degree	38	y	Y	crosswords	crosswords.y	59	22.39833778	18	109.8684494	-76.11	130.6183038	-470	89.9830089	10	106.4827223	5	90.01558593	16	127.595966	4	84.66554136	109.6336875	17	106.9689563	-145.309	117.5197061	-368	115.9178826	10	106.4827223	5	90.01558593	16	127.595966	5	97.01798159	114.7491661	-2.899493105	-13.09859768	25.93487366	0	0	0	12.35244023	5.11547858	1	4
156	m	hs grad or less	43	y	M	lumosity	lumosity.y	62	21.87412667	12	91.65967918	-459.105	89.50279329	-430	98.36085186	7	96.91529003	5	90.01558593	11	97.4198399	5	97.01798159	90.2837275	17	106.9689563	-533.173	84.62148798	-365	116.9642084	7	96.91529003	6	102.2366507	11	97.4198399	6	109.1710722	103.3630974	15.3092771	-4.881305314	18.60335653	0	12.22106476	0	12.15309064	13.07936992	1	4
157	f	some college	23	y	Y	lumosity	lumosity.y	37	7.517645417	11	88.54321663	-521.675	85.22059012	-445	95.02101858	3	83.61639412	5	90.01558593	6	81.96893327	6	109.1710722	83.70407462	15	100.8687377	-98.626	124.3124216	-438	96.65600612	0	70.89374579	6	102.2366507	11	97.4198399	5	97.01798159	97.20778646	12.3255211	39.09183144	1.634987539	-12.72264833	12.22106476	15.45090663	-12.15309064	13.50371183	4	5
158	f	bachelors degree	43	y	M	crosswords	crosswords.y	55	14.14218083	16	103.9697618	-398.503	94.03714158	-564	75.50562076	8	100.0782549	5	90.01558593	11	97.4198399	5	97.01798159	89.6876508	16	103.9697618	-610.3	80.02425497	-416	101.8154552	7	96.91529003	6	102.2366507	8	87.11355617	5	97.01798159	92.17244756	0	-14.01288661	26.30983448	-3.162964829	12.22106476	-10.30628372	0	2.484796764	4	3
159	m	NA	48	y	M	lumosity	lumosity.y	52	29.26397153	6	71.50566007	-157.895	115.4290217	-344	123.4396335	0	70.89374579	5	90.01558593	12	102.1387281	5	97.01798159	92.63421629	6	71.50566007	-198.579	110.7413789	-317	132.7242654	6	93.70903787	7	114.8036483	13	107.6954863	7	121.0680766	112.5078768	0	-4.687642832	9.284631881	22.81529208	24.78806232	5.556758251	24.05009504	19.87366047	NA	NA
160	f	hs grad or less	55	o	M	lumosity	lumosity.o	58	13.68378292	16	103.9697618	-505.473	86.18887544	-681	64.08484795	12	112.8487574	5	90.01558593	11	97.4198399	5	97.01798159	87.88355314	21	118.4923683	-231.779	107.1855449	-502	84.21887411	11	109.6062241	5	90.01558593	12	102.1387281	4	84.66554136	98.92214216	14.52260651	20.99666948	20.13402616	-3.242533378	0	4.718888164	-12.35244023	11.03858902	4	2
161	f	bachelors degree	42	y	M	lumosity	lumosity.y	60	59.77057111	23	124.4099523	-327.397	99.61613842	-331	128.1185036	9	103.2905327	7	114.8036483	13	107.6954863	4	84.66554136	115.060525	17	106.9689563	-408.93	93.36557027	-315	133.5809616	17	128.2711147	6	102.2366507	12	102.1387281	5	97.01798159	115.2780122	-17.44099602	-6.250568148	5.462457932	24.980582	-12.56699756	-5.556758251	12.35244023	0.217487202	3	2
163	f	advanced degree	50	o	M	lumosity	lumosity.o	38	9.098714444	13	94.8395275	-493.865	87.42870347	-615	69.3517089	10	106.4827223	6	102.2366507	15	120.1949445	8	133.0119868	103.1913579	16	103.9697618	-227.431	107.7337662	-449	94.14184935	14	119.1220614	7	114.8036483	9	90.06668352	5	97.01798159	106.564643	9.130234283	20.30506276	24.79014045	12.63933906	12.56699756	-30.12826095	-35.99400524	3.373285046	NA	NA
164	f	bachelors degree	61	o	M	lumosity	lumosity.o	50	22.38689708	15	100.8687377	-488.734	87.99167976	-409	103.8964838	10	106.4827223	4	78.64839376	4	75.15990345	3	72.32266178	81.7052123	15	100.8687377	-546.207	83.84454783	-551	77.0409341	11	109.6062241	3	69.29136417	5	78.88184489	3	72.32266178	74.31364595	0	-4.147131925	-26.85554969	3.123501776	-9.357029587	3.721941439	0	-7.391566357	4	2
165	m	advanced degree	33	y	Y	crosswords	crosswords.y	59	28.11305333	15	100.8687377	-496.616	87.2370799	-487	86.71556951	8	100.0782549	6	102.2366507	13	107.6954863	6	109.1710722	98.41707129	18	109.8684494	-271.795	104.0431346	-425	99.46328321	9	103.2905327	6	102.2366507	13	107.6954863	7	121.0680766	111.4817416	8.99971166	16.80605474	12.7477137	3.212277852	0	0	11.89700439	13.06467026	4	3
166	m	advanced degree	47	y	M	crosswords	crosswords.y	44	11.69955361	19	112.8487574	-139.313	118.7094231	-364	117.264271	10	106.4827223	5	90.01558593	5	78.88184489	6	109.1710722	108.1496204	21	118.4923683	-264.848	104.645504	-371	114.870504	9	103.2905327	6	102.2366507	12	102.1387281	4	84.66554136	107.378398	5.643610847	-14.06391914	-2.393767053	-3.19218958	12.22106476	23.25688317	-24.50553087	-0.771222379	3	4
167	m	bachelors degree	29	y	Y	lumosity	lumosity.y	50	11.07202944	13	94.8395275	-313.414	100.7306642	-341	124.5226947	0	70.89374579	6	102.2366507	6	81.96893327	4	84.66554136	90.07132303	19	112.8487574	-282.364	103.172302	-339	125.2148302	3	83.61639412	8	127.5555825	8	87.11355617	6	109.1710722	111.6220999	18.00922994	2.441637786	0.692135405	12.72264833	25.31893183	5.144622908	24.50553087	21.55077683	3	4
168	m	bachelors degree	47	y	M	lumosity	lumosity.y	23	4.327052451	15	100.8687377	-393.459	94.31039417	-459	92.11688449	9	103.2905327	5	90.01558593	9	90.06668352	5	97.01798159	91.88491047	19	112.8487574	-474.432	88.90897258	-445	95.02101858	12	112.8487574	4	78.64839376	6	81.96893327	4	84.66554136	88.77629532	11.98001971	-5.401421592	2.904134091	9.558224734	-11.36719217	-8.097750249	-12.35244023	-3.108615153	2	3
169	f	some college	18	y	Y	crosswords	crosswords.y	7	1.508265	20	115.7229157	-139.313	118.7094231	-370	115.2217812	14	119.1220614	6	102.2366507	14	113.8168191	5	97.01798159	119.8498243	16	103.9697618	-277.7	103.5582712	-334	126.7685565	13	116.0032086	6	102.2366507	6	81.96893327	5	97.01798159	107.6402814	-11.75315395	-15.15115196	11.54677525	-3.118852745	0	-31.8478858	0	-12.20954297	NA	3
170	f	some college	20	y	Y	crosswords	crosswords.y	33	13.07609167	7	75.29108861	-118.693	121.0680766	-310	135.3517215	11	109.6062241	4	78.64839376	11	97.4198399	5	97.01798159	103.3974976	9	82.29468311	-198.579	110.7413789	-337	125.7674562	8	100.0782549	6	102.2366507	15	120.1949445	5	97.01798159	109.4557456	7.0035945	-10.32669773	-9.584265299	-9.527969208	23.58825693	22.77510457	0	6.058248053	4	3
171	f	advanced degree	28	y	Y	crosswords	crosswords.y	50	17.30987444	12	91.65967918	-486.828	88.02245857	-337	125.7674562	9	103.2905327	6	102.2366507	10	93.4066386	6	109.1710722	103.1989817	13	94.8395275	-351.792	97.90267308	-348	122.2515532	7	96.91529003	7	114.8036483	13	107.6954863	7	121.0680766	113.2183699	3.179848312	9.880214514	-3.51590301	-6.375242681	12.56699756	14.28884771	11.89700439	10.01938817	3	3
172	f	advanced degree	18	y	Y	crosswords	crosswords.y	0	0.215756944	13	94.8395275	-621.533	79.23729632	-469	90.19161952	2	80.40665395	4	78.64839376	14	113.8168191	5	97.01798159	83.93080193	16	103.9697618	-141.426	118.4287944	-397	107.0063377	2	80.40665395	7	114.8036483	15	120.1949445	5	97.01798159	110.1759008	9.130234283	39.19149807	16.81471818	0	36.15525449	6.378125399	0	26.24509892	1	4
173	f	advanced degree	54	o	M	crosswords	crosswords.o	14	3.35975	22	121.4547391	-307.241	101.2049233	-443	95.50283079	17	128.2711147	6	102.2366507	17	137.1423714	6	109.1710722	122.9110916	21	118.4923683	-151.86	116.747015	-443	95.50283079	15	122.4665932	5	90.01558593	14	113.8168191	5	97.01798159	112.9026201	-2.962370769	15.54209173	0	-5.80452153	-12.22106476	-23.32555234	-12.15309064	-10.00847151	1	2
174	m	some college	25	y	Y	crosswords	crosswords.y	24	5.518985555	27	136.391296	-320.396	100.3987723	-355	119.7341376	23	145.5755964	6	102.2366507	14	113.8168191	5	97.01798159	128.2931568	29	141.9590755	-202.24	110.0356278	-328	129.2296594	15	122.4665932	7	114.8036483	13	107.6954863	5	97.01798159	130.3827019	5.567779535	9.636855501	9.4955218	-23.10900321	12.56699756	-6.121332753	0	2.089545085	3	3
175	f	some college	58	o	M	lumosity	lumosity.o	67	36.78934514	8	78.75052699	-615.08	79.61903821	-367	116.2690585	4	87.02169153	6	102.2366507	13	107.6954863	5	97.01798159	92.05692611	10	85.57372703	-521.54	85.28704751	-408	104.1320842	6	93.70903787	5	90.01558593	14	113.8168191	4	84.66554136	89.50279329	6.823200042	5.668009308	-12.13697433	6.687346339	-12.22106476	6.121332753	-12.35244023	-2.554132816	2	1
176	m	some college	30	y	Y	lumosity	lumosity.y	54	10.97578208	21	118.4923683	-103.832	123.2148701	-353	120.446814	9	103.2905327	8	127.5555825	15	120.1949445	8	133.0119868	136.114772	20	115.7229157	-154.501	116.3565677	-353	120.446814	12	112.8487574	9	140.9426022	16	127.595966	7	121.0680766	137.7295667	-2.76945256	-6.85830234	0	9.558224734	13.38701972	7.40102151	-11.94391021	1.614794714	2	3
177	m	NA	38	y	Y	crosswords	crosswords.y	6	1.450598333	9	82.29468311	-447.082	90.26073496	-334	126.7685565	4	87.02169153	5	90.01558593	12	102.1387281	5	97.01798159	93.89572745	12	91.65967918	-369.022	96.31127953	-384	110.9835584	6	93.70903787	7	114.8036483	12	102.1387281	6	109.1710722	104.3570463	9.364996075	6.050544566	-15.78499809	6.687346339	24.78806232	0	12.15309064	10.46131883	2	4
178	m	advanced degree	70	o	O	lumosity	lumosity.o	61	26.41875764	10	85.57372703	-744.121	72.42425073	-706	62.61295961	3	83.61639412	3	69.29136417	3	70.96685372	0	59.35814637	54.78740586	10	85.57372703	-646.036	77.73724256	-599	71.13480652	5	90.43034386	3	69.29136417	4	75.15990345	3	72.32266178	64.21447742	0	5.312991827	8.52184691	6.813949733	0	4.193049736	12.96451541	9.427071567	3	2
179	f	advanced degree	29	y	Y	lumosity	lumosity.y	60	11.82345694	16	103.9697618	-252.907	105.9185238	-382	111.5668384	10	106.4827223	7	114.8036483	14	113.8168191	5	97.01798159	112.7254975	16	103.9697618	-221.969	108.4449083	-387	109.9797641	11	109.6062241	6	102.2366507	14	113.8168191	5	97.01798159	110.8814977	0	2.52638445	-1.587074306	3.123501776	-12.56699756	0	0	-1.843999735	2	2
180	m	advanced degree	47	y	M	lumosity	lumosity.y	57	19.44566708	17	106.9689563	-515.557	85.57964348	-449	94.14184935	8	100.0782549	6	102.2366507	11	97.4198399	5	97.01798159	95.83307002	19	112.8487574	-302.943	101.586676	-371	114.870504	3	83.61639412	6	102.2366507	15	120.1949445	6	109.1710722	110.8137363	5.879801159	16.00703249	20.7286546	-16.46186073	0	22.77510457	12.15309064	14.98066633	3	4
181	f	advanced degree	29	y	Y	lumosity	lumosity.y	31	15.214045	14	97.84621295	-271.677	104.1862985	-351	121.0980955	7	96.91529003	7	114.8036483	9	90.06668352	4	84.66554136	102.1613174	17	106.9689563	-92.704	124.8254264	-317	132.7242654	16	125.4160785	4	78.64839376	10	93.4066386	5	97.01798159	114.2263562	9.122743327	20.63912798	11.62616987	28.50078851	-36.15525449	3.339955082	12.35244023	12.06503882	3	5
182	f	some college	50	o	M	lumosity	lumosity.o	17	7.531124167	5	67.59046395	-47.359	136.9072026	-442	95.75943256	11	109.6062241	6	102.2366507	11	97.4198399	5	97.01798159	101.3657488	15	100.8687377	-92.704	124.8254264	-447	94.56585795	14	119.1220614	6	102.2366507	11	97.4198399	4	84.66554136	105.7376873	33.27827378	-12.08177615	-1.193574617	9.515837288	0	0	-12.35244023	4.371938473	2	1
183	m	bachelors degree	58	o	M	lumosity	lumosity.o	68	55.28593611	22	121.4547391	-186.398	112.2616031	-406	104.6415947	11	109.6062241	4	78.64839376	10	93.4066386	4	84.66554136	100.9247338	25	129.8784281	-113.985	122.0300291	-404	105.1012089	3	83.61639412	5	90.01558593	14	113.8168191	4	84.66554136	106.9855649	8.423689047	9.76842607	0.459614179	-25.98982994	11.36719217	20.41018047	0	6.060831082	2	2
184	m	hs grad or less	21	y	Y	lumosity	lumosity.y	19	4.24497875	16	103.9697618	-352.224	97.77088515	-390	109.1082611	8	100.0782549	5	90.01558593	11	97.4198399	4	84.66554136	95.7089902	21	118.4923683	-497.529	87.0811887	-398	106.7043604	4	87.02169153	6	102.2366507	6	81.96893327	5	97.01798159	95.11934849	14.52260651	-10.68969645	-2.40390074	-13.05656332	12.22106476	-15.45090663	12.35244023	-0.589641713	2	3
185	f	advanced degree	53	o	M	crosswords	crosswords.o	59	20.13681806	16	103.9697618	-628.847	78.75052699	-514	82.34692675	5	90.43034386	4	78.64839376	11	97.4198399	4	84.66554136	79.69382007	19	112.8487574	-369.022	96.31127953	-437	96.84674887	9	103.2905327	6	102.2366507	10	93.4066386	4	84.66554136	97.2835817	8.878995662	17.56075254	14.49982212	12.86018885	23.58825693	-4.013201299	0	17.58976163	3	3
186	m	hs grad or less	49	y	M	lumosity	lumosity.y	41	7.7833525	11	88.54321663	-367.027	96.37270158	-420	100.6933581	1	77.29023023	7	114.8036483	7	84.57097827	6	109.1710722	92.90210144	13	94.8395275	-217.51	109.1665804	-374	114.0404806	9	103.2905327	6	102.2366507	9	90.06668352	7	121.0680766	108.5017314	6.296310865	12.79387882	13.34712253	26.00030248	-12.56699756	5.495705243	11.89700439	15.59962992	3	3
187	f	bachelors degree	53	o	M	crosswords	crosswords.o	62	27.1785875	14	97.84621295	-261.277	105.2079414	-390	109.1082611	0	70.89374579	6	102.2366507	12	102.1387281	6	109.1710722	99.02299158	14	97.84621295	-440.892	90.88725766	-431	98.13198035	7	96.91529003	5	90.01558593	11	97.4198399	5	97.01798159	91.99254381	0	-14.32068377	-10.97628079	26.02154423	-12.22106476	-4.718888164	-12.15309064	-7.03044777	4	4
188	m	hs grad or less	52	o	M	lumosity	lumosity.o	66	34.43982667	24	127.258891	-142.668	117.9393078	-408	104.1320842	14	119.1220614	6	102.2366507	13	107.6954863	7	121.0680766	124.3262917	24	127.258891	-357.848	96.99137146	-427	99.01925723	10	106.4827223	8	127.5555825	11	97.4198399	4	84.66554136	109.6841212	0	-20.94793629	-5.11282698	-12.63933906	25.31893183	-10.27564642	-36.40253527	-14.64217041	3	3
189	f	bachelors degree	48	y	M	lumosity	lumosity.y	60	14.51755222	14	97.84621295	-406.995	93.5704225	-429	98.58185637	8	100.0782549	6	102.2366507	13	107.6954863	5	97.01798159	99.14246001	14	97.84621295	-652.882	77.31364775	-394	107.9902732	7	96.91529003	4	78.64839376	12	102.1387281	5	97.01798159	89.66403905	0	-16.25677476	9.40841683	-3.162964829	-23.58825693	-5.556758251	0	-9.478420965	2	2
190	m	advanced degree	33	y	Y	lumosity	lumosity.y	41	8.395325972	15	100.8687377	-355.019	97.50300339	-321	131.0180689	9	103.2905327	6	102.2366507	12	102.1387281	6	109.1710722	111.120436	12	91.65967918	-86.562	126.1676356	-397	107.0063377	7	96.91529003	5	90.01558593	10	93.4066386	5	97.01798159	100.3167679	-9.209058542	28.66463219	-24.01173117	-6.375242681	-12.22106476	-8.732089463	-12.15309064	-10.80366804	NA	3
191	f	bachelors degree	41	y	M	crosswords	crosswords.y	52	13.36897083	16	103.9697618	-505.473	86.18887544	-437	96.84674887	2	80.40665395	5	90.01558593	12	102.1387281	5	97.01798159	89.31632756	21	118.4923683	-255.02	105.7617501	-381	111.8447446	12	112.8487574	7	114.8036483	13	107.6954863	5	97.01798159	116.505942	14.52260651	19.5728747	14.99799576	32.44210349	24.78806232	5.556758251	0	27.18961439	4	4
192	f	advanced degree	43	y	M	lumosity	lumosity.y	20	3.332448301	16	103.9697618	-184.97	112.6083954	-464	91.15914822	9	103.2905327	7	114.8036483	8	87.11355617	5	97.01798159	102.2969579	18	109.8684494	-186.398	112.2616031	-380	112.1319449	15	122.4665932	6	102.2366507	2	66.18670658	6	109.1710722	108.4056401	5.898687608	-0.346792308	20.97279669	19.17606047	-12.56699756	-20.9268496	12.15309064	6.108682195	4	2
193	f	bachelors degree	35	y	Y	crosswords	crosswords.y	27	6.143540278	14	97.84621295	-371.281	96.02637887	-384	110.9835584	11	109.6062241	5	90.01558593	13	107.6954863	5	97.01798159	102.0333746	14	97.84621295	-392.261	94.40238768	-498	84.92095746	3	83.61639412	6	102.2366507	15	120.1949445	6	109.1710722	98.01550507	0	-1.623991196	-26.06260094	-25.98982994	12.22106476	12.49945815	12.15309064	-4.017869567	1	2
194	m	bachelors degree	40	y	M	lumosity	lumosity.y	63	20.73099042	21	118.4923683	-453.664	89.70180559	-384	110.9835584	18	131.5085227	6	102.2366507	16	127.595966	6	109.1710722	121.7383873	28	139.4590829	-574.677	82.33947649	-305	136.607115	13	116.0032086	5	90.01558593	14	113.8168191	5	97.01798159	118.1932888	20.96671461	-7.362329102	25.62355664	-15.50531405	-12.22106476	-13.77914691	-12.15309064	-3.545098475	4	3
195	m	some college	63	o	M	crosswords	crosswords.o	58	14.12551389	13	94.8395275	-256.134	105.6936104	-543	78.02460735	8	100.0782549	6	102.2366507	4	75.15990345	4	84.66554136	85.29307478	7	75.29108861	-335.872	98.98191037	-541	78.31472693	9	103.2905327	5	90.01558593	8	87.11355617	4	84.66554136	79.90605472	-19.54843889	-6.71170001	0.290119582	3.212277852	-12.22106476	11.95365272	0	-5.387020058	4	4
196	f	bachelors degree	48	y	M	lumosity	lumosity.y	61	14.28635079	11	88.54321663	-701.211	74.80046366	-407	104.3725965	7	96.91529003	6	102.2366507	11	97.4198399	5	97.01798159	90.39377594	10	85.57372703	-155.402	115.9571997	-417	101.5417153	8	100.0782549	7	114.8036483	14	113.8168191	5	97.01798159	106.9440594	-2.969489603	41.15673599	-2.830881206	3.162964829	12.56699756	16.39697917	0	16.55028344	3	4
197	m	bachelors degree	33	y	Y	lumosity	lumosity.y	55	12.15735448	22	121.4547391	-373.533	95.87952609	-405	104.8688661	18	131.5085227	5	90.01558593	13	107.6954863	5	97.01798159	111.5869153	20	115.7229157	-244.563	106.4459211	-341	124.5226947	12	112.8487574	6	102.2366507	13	107.6954863	5	97.01798159	115.9834721	-5.731823328	10.56639503	19.65382866	-18.65976522	12.22106476	0	0	4.396556818	3	4
198	f	advanced degree	29	y	Y	crosswords	crosswords.y	56	14.40906639	12	91.65967918	-732.077	73.17631417	-400	106.1123696	1	77.29023023	5	90.01558593	14	113.8168191	5	97.01798159	87.24243085	11	88.54321663	-155.402	115.9571997	-475	88.98718796	1	77.29023023	5	90.01558593	11	97.4198399	6	109.1710722	91.82877592	-3.116462554	42.78088548	-17.12518168	0	0	-16.39697917	12.15309064	4.58634507	3	4
199	m	bachelors degree	56	o	M	lumosity	lumosity.o	46	25.20347444	17	106.9689563	-232.029	107.0812315	-436	97.04838168	9	103.2905327	5	90.01558593	7	84.57097827	5	97.01798159	96.41105943	19	112.8487574	-535.45	84.39920131	-465	90.96779549	13	116.0032086	5	90.01558593	12	102.1387281	4	84.66554136	95.24490606	5.879801159	-22.68203024	-6.08058619	12.7126759	0	17.56774979	-12.35244023	-1.166153369	2	4
201	f	some college	19	y	Y	lumosity	lumosity.y	16	7.878495417	13	94.8395275	-101.001	123.7738898	-466	90.74793348	15	122.4665932	8	127.5555825	11	97.4198399	7	121.0680766	118.7256576	19	112.8487574	-227.431	107.7337662	-388	109.6336875	18	131.5085227	7	114.8036483	14	113.8168191	6	109.1710722	124.3680272	18.00922994	-16.04012356	18.88575403	9.041929477	-12.75193428	16.39697917	-11.89700439	5.642369585	3	1
202	f	bachelors degree	27	y	Y	lumosity	lumosity.y	54	15.96925597	3	57.8512193	-193.626	111.4019867	-442	95.75943256	10	106.4827223	5	90.01558593	10	93.4066386	5	97.01798159	88.01733227	10	85.57372703	-85.302	126.860641	-418	101.2497901	11	109.6062241	6	102.2366507	13	107.6954863	4	84.66554136	104.1475685	27.72250773	15.45865434	5.49035756	3.123501776	12.22106476	14.28884771	-12.35244023	16.13023618	4	5
203	m	NA	53	o	M	lumosity	lumosity.o	62	12.48395083	17	106.9689563	-345.455	98.54067692	-400	106.1123696	9	103.2905327	5	90.01558593	10	93.4066386	5	97.01798159	98.72403243	16	103.9697618	-432.278	91.64662801	-359	118.7337831	11	109.6062241	5	90.01558593	6	81.96893327	6	109.1710722	101.0180896	-2.999194503	-6.894048908	12.62141347	6.315691356	0	-11.43770533	12.15309064	2.294057206	2	4
204	f	bachelors degree	42	y	M	lumosity	lumosity.y	34	8.140519167	10	85.57372703	-349.128	98.1357357	-458	92.30876391	1	77.29023023	6	102.2366507	10	93.4066386	4	84.66554136	83.74435533	11	88.54321663	-92.704	124.8254264	-411	103.29435	14	119.1220614	4	78.64839376	8	87.11355617	5	97.01798159	99.55649322	2.969489603	26.68969073	10.98558605	41.83183112	-23.58825693	-6.293082423	12.35244023	15.81213789	3	3
205	f	bachelors degree	64	o	M	lumosity	lumosity.o	49	44.05352889	13	94.8395275	-360.225	96.82388725	-528	80.07839292	10	106.4827223	0	61.31611067	14	113.8168191	3	72.32266178	81.830016	15	100.8687377	-501.478	86.73210877	-448	94.35441755	0	70.89374579	5	90.01558593	12	102.1387281	4	84.66554136	82.85084809	6.02921023	-10.09177848	14.27602463	-35.58897649	28.69947526	-11.678091	12.34287958	1.020832087	3	2
206	m	some college	22	y	Y	lumosity	lumosity.y	36	11.11369348	18	109.8684494	-669.873	76.4203778	-386	110.2934782	10	106.4827223	6	102.2366507	11	97.4198399	5	97.01798159	99.82112833	17	106.9689563	-161.009	114.9928228	-369	115.5624496	8	100.0782549	6	102.2366507	12	102.1387281	5	97.01798159	109.60165	-2.899493105	38.57244496	5.268971444	-6.404467432	0	4.718888164	0	9.780521622	2	3
207	m	advanced degree	42	y	M	lumosity	lumosity.y	55	13.46500694	18	109.8684494	-101.001	123.7738898	-398	106.7043604	5	90.43034386	6	102.2366507	15	120.1949445	5	97.01798159	112.0545835	21	118.4923683	-313.294	100.8500751	-404	105.1012089	12	112.8487574	8	127.5555825	16	127.595966	5	97.01798159	121.7277426	8.6239189	-22.92381469	-1.603151528	22.41841358	25.31893183	7.40102151	0	9.673159134	2	2
208	f	advanced degree	32	y	Y	crosswords	crosswords.y	35	10.05582889	18	109.8684494	-202.24	110.0356278	-363	117.5640076	10	106.4827223	4	78.64839376	13	107.6954863	5	97.01798159	106.6590946	21	118.4923683	-430.852	91.75519599	-423	99.9031128	10	106.4827223	7	114.8036483	8	87.11355617	6	109.1710722	106.6878931	8.6239189	-18.28043179	-17.6608948	0	36.15525449	-20.58193014	12.15309064	0.028798462	3	4
209	m	bachelors degree	19	y	Y	lumosity	lumosity.y	26	5.694765833	17	106.9689563	-214.467	109.3921935	-442	95.75943256	11	109.6062241	6	102.2366507	13	107.6954863	7	121.0680766	112.5977878	17	106.9689563	-526.797	85.02558854	-460	91.91078039	17	128.2711147	5	90.01558593	13	107.6954863	6	109.1710722	104.4192755	0	-24.36660498	-3.848652169	18.66489065	-12.22106476	0	-11.89700439	-8.178512363	3	3
210	m	some college	30	y	Y	crosswords	crosswords.y	36	9.817667222	12	91.65967918	-327.298	99.76522691	-377	113.0162768	4	87.02169153	5	90.01558593	14	113.8168191	7	121.0680766	103.8040546	15	100.8687377	-327.966	99.4931125	-350	121.4651083	8	100.0782549	7	114.8036483	9	90.06668352	6	109.1710722	108.8186951	9.209058542	-0.272114418	8.448831429	13.05656332	24.78806232	-23.75013555	-11.89700439	5.014640535	2	1
211	f	advanced degree	63	o	M	crosswords	crosswords.o	51	22.55730611	9	82.29468311	-648.43	77.53340682	-445	95.02101858	8	100.0782549	5	90.01558593	12	102.1387281	5	97.01798159	86.16038298	11	88.54321663	-614.863	79.72173356	-418	101.2497901	11	109.6062241	5	90.01558593	5	78.88184489	4	84.66554136	83.5213386	6.248533522	2.188326741	6.22877154	9.527969208	0	-23.25688317	-12.35244023	-2.639044387	4	2
212	m	bachelors degree	24	y	Y	lumosity	lumosity.y	18	5.313398472	13	94.8395275	-116.13	121.7917755	-443	95.50283079	8	100.0782549	6	102.2366507	10	93.4066386	5	97.01798159	100.9695399	8	78.75052699	-218.239	109.0009546	-584	72.91412906	0	70.89374579	8	127.5555825	12	102.1387281	7	121.0680766	95.54958144	-16.08900051	-12.79082093	-22.58870173	-29.18450906	25.31893183	8.732089463	24.05009504	-5.419958466	2	3
213	m	bachelors degree	24	y	Y	crosswords	crosswords.y	60	18.53604194	28	139.4590829	-457.003	89.62147321	-450	93.96044048	16	125.4160785	7	114.8036483	16	127.595966	7	121.0680766	127.5757493	24	127.258891	-182.029	112.8972263	-415	102.1086165	19	134.6704795	5	90.01558593	16	127.595966	5	97.01798159	122.20686	-12.20019189	23.2757531	8.148176065	9.254400988	-24.78806232	0	-24.05009504	-5.36888925	4	5
215	m	advanced degree	43	y	M	lumosity	lumosity.y	40	9.689287361	5	67.59046395	-504.045	86.38131889	-517	82.00724801	3	83.61639412	4	78.64839376	7	84.57097827	6	109.1710722	74.32977658	8	78.75052699	-375.646	95.64295372	-340	124.913806	0	70.89374579	5	90.01558593	7	84.57097827	5	97.01798159	85.55003873	11.16006304	9.261634829	42.90655795	-12.72264833	11.36719217	0	-12.15309064	11.22026215	2	3
216	f	advanced degree	72	o	O	lumosity	lumosity.o	44	49.04276431	14	97.84621295	-378.392	95.53010728	-513	82.48766262	0	70.89374579	6	102.2366507	11	97.4198399	6	109.1710722	88.98718796	14	97.84621295	-235.35	106.7661851	-425	99.46328321	5	90.43034386	6	102.2366507	10	93.4066386	5	97.01798159	96.69037885	0	11.23607784	16.97562059	19.53659806	0	-4.013201299	-12.15309064	7.703190887	4	5
217	f	advanced degree	33	y	Y	crosswords	crosswords.y	8	2.524373333	10	85.57372703	-202.24	110.0356278	-358	118.9387339	4	87.02169153	6	102.2366507	9	90.06668352	5	97.01798159	97.57476459	13	94.8395275	-349.53	98.07563584	-384	110.9835584	4	87.02169153	7	114.8036483	13	107.6954863	6	109.1710722	105.3864198	9.265800469	-11.95999194	-7.955175521	0	12.56699756	17.6288028	12.15309064	7.811655203	1	4
218	m	advanced degree	27	y	Y	crosswords	crosswords.y	8	1.124549444	16	103.9697618	-134.107	119.206344	-395	107.6275565	8	100.0782549	7	114.8036483	6	81.96893327	4	84.66554136	102.9478192	19	112.8487574	-294.287	102.330897	-425	99.46328321	10	106.4827223	7	114.8036483	2	66.18670658	4	84.66554136	96.5986791	8.878995662	-16.87544703	-8.164273271	6.404467432	0	-15.78222669	0	-6.349140058	4	4
219	m	hs grad or less	29	y	Y	lumosity	lumosity.y	53	10.52620528	19	112.8487574	-217.51	109.1665804	-400	106.1123696	16	125.4160785	7	114.8036483	10	93.4066386	6	109.1710722	116.9995739	20	115.7229157	-16165.361	44.18081047	-1170	44.18081047	0	70.89374579	4	78.64839376	0	49.67089059	4	84.66554136	51.37847791	2.874158287	-64.98576994	-61.93155918	-54.52233275	-36.15525449	-43.73574801	-24.50553087	-65.62109598	1	4
220	f	bachelors degree	28	y	Y	lumosity	lumosity.y	59	29.68228611	17	106.9689563	-50.811	134.2531421	-367	116.2690585	9	103.2905327	6	102.2366507	16	127.595966	7	121.0680766	127.4953793	18	109.8684494	-417.48	92.67622633	-394	107.9902732	11	109.6062241	8	127.5555825	17	137.1423714	6	109.1710722	122.7097698	2.899493105	-41.57691579	-8.278785337	6.315691356	25.31893183	9.546405435	-11.89700439	-4.785609533	4	4
221	f	bachelors degree	32	y	Y	crosswords	crosswords.y	4	0.882869722	11	88.54321663	-294.287	102.330897	-402	105.565664	11	109.6062241	7	114.8036483	15	120.1949445	6	109.1710722	112.0442929	15	100.8687377	-500.792	86.80359336	-460	91.91078039	10	106.4827223	5	90.01558593	14	113.8168191	6	109.1710722	99.66832295	12.3255211	-15.52730364	-13.65488365	-3.123501776	-24.78806232	-6.378125399	0	-12.37596994	3	2
222	f	bachelors degree	48	y	M	crosswords	crosswords.y	29	6.496405	17	106.9689563	-121.573	119.930612	-519	81.68167022	8	100.0782549	7	114.8036483	7	84.57097827	6	109.1710722	103.9813406	16	103.9697618	-226.823	108.1064635	-430	98.36085186	16	125.4160785	7	114.8036483	9	90.06668352	6	109.1710722	111.998055	-2.999194503	-11.82414851	16.67918165	25.33782368	0	5.495705243	0	8.016714419	4	3
223	f	some college	21	y	Y	lumosity	lumosity.y	9	1.810381389	26	132.9285386	-207.255	109.8407057	-443	95.50283079	15	122.4665932	8	127.5555825	12	102.1387281	5	97.01798159	121.2393137	23	124.4099523	-610.3	80.02425497	-405	104.8688661	7	96.91529003	8	127.5555825	12	102.1387281	7	121.0680766	113.6412049	-8.518586283	-29.8164507	9.366035303	-25.55130315	0	0	24.05009504	-7.598108835	4	3
224	m	hs grad or less	21	y	Y	lumosity	lumosity.y	12	2.908449722	11	88.54321663	-264.848	104.645504	-454	93.12637837	13	116.0032086	7	114.8036483	15	120.1949445	5	97.01798159	108.4100004	8	78.75052699	-261.277	105.2079414	-482	87.6810564	9	103.2905327	7	114.8036483	13	107.6954863	6	109.1710722	101.3769749	-9.792689645	0.562437431	-5.44532197	-12.7126759	0	-12.49945815	12.15309064	-7.03302553	3	2
225	f	some college	51	o	M	crosswords	crosswords.o	0	0	4	63.24467989	-196.785	110.9300349	-503	84.04936081	3	83.61639412	4	78.64839376	13	107.6954863	4	84.66554136	79.00164119	5	67.59046395	-393.459	94.31039417	-424	99.68323205	2	80.40665395	4	78.64839376	14	113.8168191	5	97.01798159	83.28768848	4.345784058	-16.61964076	15.63387124	-3.209740174	0	6.121332753	12.35244023	4.286047285	4	5
226	f	hs grad or less	42	y	M	lumosity	lumosity.y	52	15.50754708	6	71.50566007	-753.127	72.17826899	-379	112.4394233	1	77.29023023	4	78.64839376	11	97.4198399	4	84.66554136	74.95198059	13	94.8395275	-327.397	99.61613842	-464	91.15914822	4	87.02169153	4	78.64839376	16	127.595966	5	97.01798159	94.02100699	23.33386742	27.43786943	-21.28027512	9.731461301	0	30.17612608	12.35244023	19.06902641	3	1
227	f	some college	53	o	M	crosswords	crosswords.o	60	17.20980167	14	97.84621295	-271.677	104.1862985	-482	87.6810564	5	90.43034386	5	90.01558593	11	97.4198399	6	109.1710722	94.30638962	18	109.8684494	-155.402	115.9571997	-492	85.84360186	11	109.6062241	5	90.01558593	13	107.6954863	6	109.1710722	106.8033351	12.02223643	11.7709012	-1.837454539	19.17588021	0	10.27564642	0	12.49694551	5	4
228	m	advanced degree	31	y	Y	lumosity	lumosity.y	39	15.96186917	14	97.84621295	-475.409	88.76149924	-388	109.6336875	2	80.40665395	4	78.64839376	15	120.1949445	5	97.01798159	93.18427226	18	109.8684494	-264.848	104.645504	-344	123.4396335	0	70.89374579	6	102.2366507	12	102.1387281	5	97.01798159	102.3761677	12.02223643	15.88400476	13.80594597	-9.512908155	23.58825693	-18.0562164	0	9.191895441	1	1
229	m	NA	22	y	Y	crosswords	crosswords.y	35	5.624673889	22	121.4547391	-515.557	85.57964348	-354	120.0483363	4	87.02169153	6	102.2366507	9	90.06668352	5	97.01798159	100.6411368	16	103.9697618	-860.426	66.50975838	-390	109.1082611	8	100.0782549	6	102.2366507	9	90.06668352	5	97.01798159	92.1553627	-17.48497728	-19.0698851	-10.94007513	13.05656332	0	0	0	-8.48577408	4	3
230	f	hs grad or less	23	y	Y	crosswords	crosswords.y	7	1.65624	7	75.29108861	-307.241	101.2049233	-445	95.02101858	11	109.6062241	5	90.01558593	9	90.06668352	5	97.01798159	89.75362827	6	71.50566007	-189.432	111.8294817	-394	107.9902732	7	96.91529003	6	102.2366507	12	102.1387281	5	97.01798159	97.29873237	-3.785428537	10.62455838	12.96925462	-12.69093404	12.22106476	12.07204455	0	7.545104101	4	2
231	m	NA	40	y	M	lumosity	lumosity.y	59	88.36551458	19	112.8487574	-50.811	134.2531421	-388	109.6336875	16	125.4160785	8	127.5555825	11	97.4198399	7	121.0680766	131.9626445	23	124.4099523	-159.167	115.2654979	-396	107.3069857	12	112.8487574	8	127.5555825	15	120.1949445	6	109.1710722	128.5397507	11.56119486	-18.98764424	-2.326701766	-12.5673211	0	22.77510457	-11.89700439	-3.422893783	5	5
232	f	some college	50	o	M	lumosity	lumosity.o	44	12.19006319	14	97.84621295	-402.742	93.77814388	-467	90.54425439	9	103.2905327	5	90.01558593	7	84.57097827	4	84.66554136	86.27405543	16	103.9697618	-277.016	103.6349728	-458	92.30876391	11	109.6062241	5	90.01558593	7	84.57097827	5	97.01798159	95.26057718	6.123548824	9.856828954	1.764509526	6.315691356	0	0	12.35244023	8.986521744	3	1
233	m	advanced degree	45	y	M	lumosity	lumosity.y	32	7.421796389	11	88.54321663	-391.296	94.52604736	-408	104.1320842	4	87.02169153	4	78.64839376	15	120.1949445	5	97.01798159	92.5162788	9	82.29468311	-383.99	95.05644178	-391	108.8231249	7	96.91529003	6	102.2366507	14	113.8168191	4	84.66554136	95.92207611	-6.248533522	0.530394421	4.691040721	9.893598494	23.58825693	-6.378125399	-12.35244023	3.405797308	3	5
234	m	advanced degree	26	y	Y	lumosity	lumosity.y	59	33.73733014	27	136.391296	-98.626	124.3124216	-448	94.35441755	9	103.2905327	5	90.01558593	16	127.595966	6	109.1710722	120.5701674	32	147.9585436	-280.738	103.3554553	-408	104.1320842	12	112.8487574	6	102.2366507	16	127.595966	5	97.01798159	123.0435906	11.56724766	-20.95696621	9.777666653	9.558224734	12.22106476	0	-12.15309064	2.473423177	4	5
235	f	some college	61	o	M	crosswords	crosswords.o	16	3.181196111	6	71.50566007	-1343.225	55.44263447	-493	85.69750507	1	77.29023023	4	78.64839376	9	90.06668352	4	84.66554136	64.76696344	11	88.54321663	-945.01	62.27043326	-456	92.66782893	3	83.61639412	6	102.2366507	5	78.88184489	5	97.01798159	77.38357058	17.03755656	6.827798785	6.97032386	6.326163892	23.58825693	-11.18483862	12.35244023	12.61660714	1	5
236	f	some college	43	y	M	crosswords	crosswords.y	6	1.3251	12	91.65967918	-292.569	102.4894401	-512	82.61229025	2	80.40665395	5	90.01558593	11	97.4198399	6	109.1710722	88.42312579	11	88.54321663	-561.077	83.09921295	-457	92.49939293	10	106.4827223	6	102.2366507	9	90.06668352	6	109.1710722	93.08081841	-3.116462554	-19.39022719	9.887102686	26.07606834	12.22106476	-7.353156381	0	4.657692622	2	3
237	m	advanced degree	32	y	Y	lumosity	lumosity.y	51	14.59926403	10	85.57372703	-419.318	92.50361529	-509	83.02872605	5	90.43034386	6	102.2366507	4	75.15990345	7	121.0680766	87.53954171	10	85.57372703	-498.827	86.84743527	-399	106.4132415	2	80.40665395	5	90.01558593	11	97.4198399	6	109.1710722	89.00182001	0	-5.656180025	23.38451546	-10.02368991	-12.22106476	22.25993644	-11.89700439	1.462278294	4	4
238	f	bachelors degree	63	o	M	crosswords	crosswords.o	60	14.21744972	14	97.84621295	-563.027	82.79341523	-417	101.5417153	1	77.29023023	4	78.64839376	6	81.96893327	5	97.01798159	79.80505554	12	91.65967918	-307.241	101.2049233	-410	103.5889406	6	93.70903787	5	90.01558593	2	66.18670658	5	97.01798159	85.98260235	-6.18653377	18.41150808	2.047225264	16.41880764	11.36719217	-15.78222669	0	6.177546812	2	3
239	m	hs grad or less	58	o	M	lumosity	lumosity.o	41	27.81456764	11	88.54321663	-587.18	81.23365985	-466	90.74793348	6	93.70903787	4	78.64839376	11	97.4198399	5	97.01798159	82.33202186	12	91.65967918	-681.868	75.81148404	-355	119.7341376	8	100.0782549	5	90.01558593	12	102.1387281	5	97.01798159	94.1900796	3.116462554	-5.422175809	28.98620414	6.369216984	11.36719217	4.718888164	0	11.85805774	1	4
240	f	bachelors degree	41	y	M	crosswords	crosswords.y	62	15.35359222	16	103.9697618	-345.997	98.4582847	-404	105.1012089	2	80.40665395	4	78.64839376	4	75.15990345	5	97.01798159	84.8652664	14	97.84621295	-361.856	96.66746564	-495	85.37121426	9	103.2905327	5	90.01558593	9	90.06668352	5	97.01798159	90.14080227	-6.123548824	-1.790819054	-19.72999461	22.88387876	11.36719217	14.90678006	0	5.275535868	2	2
241	m	bachelors degree	29	y	Y	crosswords	crosswords.y	39	9.869753056	15	100.8687377	-164.087	114.426273	-379	112.4394233	6	93.70903787	6	102.2366507	2	66.18670658	6	109.1710722	99.66459562	14	97.84621295	-249.769	106.3398233	-481	87.8628862	11	109.6062241	6	102.2366507	9	90.06668352	6	109.1710722	100.5777355	-3.022524772	-8.086449702	-24.57653715	15.89718619	0	23.87997694	0	0.913139925	2	3
242	m	hs grad or less	18	y	Y	crosswords	crosswords.y	5	0.815497778	12	91.65967918	-82.213	129.8513839	-355	119.7341376	1	77.29023023	5	90.01558593	7	84.57097827	6	109.1710722	100.3577688	11	88.54321663	-65.63	132.1453918	-388	109.6336875	4	87.02169153	9	140.9426022	11	97.4198399	4	84.66554136	109.9054936	-3.116462554	2.29400788	-10.10045011	9.731461301	50.92701632	12.84886162	-24.50553087	9.547724845	2	4
243	m	some college	73	o	O	lumosity	lumosity.o	67	43.624895	10	85.57372703	-509.715	85.84360186	-525	80.71727969	6	93.70903787	5	90.01558593	3	70.96685372	4	84.66554136	74.13421603	12	91.65967918	-547.163	83.81790041	-371	114.870504	8	100.0782549	5	90.01558593	2	66.18670658	4	84.66554136	83.28768848	6.085952157	-2.025701444	34.15322426	6.369216984	0	-4.780147138	0	9.153472455	4	2
244	f	some college	22	y	Y	crosswords	crosswords.y	62	15.60471389	12	91.65967918	-485.737	88.06853248	-395	107.6275565	5	90.43034386	6	102.2366507	14	113.8168191	5	97.01798159	97.55966164	12	91.65967918	-440.892	90.88725766	-335	126.4275297	5	90.43034386	6	102.2366507	12	102.1387281	5	97.01798159	100.0558962	0	2.818725185	18.79997327	0	0	-11.678091	0	2.496234564	1	1
245	m	advanced degree	31	y	Y	crosswords	crosswords.y	39	10.0424025	14	97.84621295	-138.833	118.9801506	-342	124.1068203	16	125.4160785	6	102.2366507	16	127.595966	6	109.1710722	126.0321768	17	106.9689563	-151.86	116.747015	-358	118.9387339	16	125.4160785	8	127.5555825	14	113.8168191	6	109.1710722	129.1062542	9.122743327	-2.233135531	-5.168086351	0	25.31893183	-13.77914691	0	3.074077444	5	3
246	f	advanced degree	48	y	M	crosswords	crosswords.y	49	12.35597028	15	100.8687377	-120.462	120.6949278	-421	100.3950446	3	83.61639412	5	90.01558593	8	87.11355617	5	97.01798159	94.97374438	16	103.9697618	-413.265	93.15120252	-386	110.2934782	6	93.70903787	6	102.2366507	6	81.96893327	4	84.66554136	92.4613649	3.101024052	-27.5437253	9.898433619	10.09264375	12.22106476	-5.144622908	-12.35244023	-2.512379483	3	3
247	f	advanced degree	65	o	O	lumosity	lumosity.o	12	2.789959444	13	94.8395275	-361.798	96.72855041	-630	68.00118446	9	103.2905327	5	90.01558593	13	107.6954863	4	84.66554136	86.3981916	17	106.9689563	-497.987	86.96742546	-560	75.83879561	9	103.2905327	6	102.2366507	11	97.4198399	4	84.66554136	89.53133618	12.12942879	-9.761124943	7.837611155	0	12.22106476	-10.27564642	0	3.133144573	4	5
248	f	hs grad or less	61	o	M	crosswords	crosswords.o	68	17.12885639	18	109.8684494	-207.255	109.8407057	-483	87.46044138	0	70.89374579	4	78.64839376	8	87.11355617	4	84.66554136	82.52444308	16	103.9697618	-271.677	104.1862985	-639	67.51311442	6	93.70903787	4	78.64839376	8	87.11355617	6	109.1710722	86.22300075	-5.898687608	-5.654407218	-19.94732696	22.81529208	0	0	24.50553087	3.698557667	3	4
249	m	some college	43	y	M	crosswords	crosswords.y	57	14.41956861	7	75.29108861	-819.069	68.65870631	-414	102.4290109	6	93.70903787	6	102.2366507	4	75.15990345	5	97.01798159	79.35322606	10	85.57372703	-214.467	109.3921935	-381	111.8447446	3	83.61639412	5	90.01558593	10	93.4066386	6	109.1710722	95.70510802	10.28263842	40.73348721	9.415733716	-10.09264375	-12.22106476	18.24673514	12.15309064	16.35188196	2	4
250	f	hs grad or less	47	y	M	crosswords	crosswords.y	57	15.58693194	13	94.8395275	-264.024	104.8570837	-382	111.5668384	6	93.70903787	5	90.01558593	6	81.96893327	4	84.66554136	90.49420131	11	88.54321663	-352.224	97.77088515	-426	99.23202524	0	70.89374579	4	78.64839376	13	107.6954863	5	97.01798159	85.16599932	-6.296310865	-7.086198521	-12.33481312	-22.81529208	-11.36719217	25.72655305	12.35244023	-5.328201987	2	3
251	f	bachelors degree	50	o	M	lumosity	lumosity.o	46	10.90644097	17	106.9689563	-417.48	92.67622633	-536	79.08076726	11	109.6062241	5	90.01558593	11	97.4198399	5	97.01798159	93.25031267	21	118.4923683	-371.281	96.02637887	-452	93.53363859	13	116.0032086	5	90.01558593	9	90.06668352	4	84.66554136	97.07117379	11.52341201	3.350152542	14.45287133	6.396984543	0	-7.353156381	-12.35244023	3.820861121	4	3
252	f	some college	20	y	Y	lumosity	lumosity.y	17	3.341858333	15	100.8687377	-227.431	107.7337662	-385	110.621335	12	112.8487574	8	127.5555825	11	97.4198399	6	109.1710722	115.898265	17	106.9689563	-85.28	127.8634635	-337	125.7674562	12	112.8487574	8	127.5555825	11	97.4198399	7	121.0680766	129.3046629	6.100218555	20.12969727	15.14612123	0	0	0	11.89700439	13.40639796	3	4
253	m	some college	59	o	M	lumosity	lumosity.o	64	17.28234097	14	97.84621295	-547.163	83.81790041	-410	103.5889406	7	96.91529003	6	102.2366507	13	107.6954863	5	97.01798159	97.11294181	14	97.84621295	-533.173	84.62148798	-477	88.67744719	4	87.02169153	7	114.8036483	14	113.8168191	5	97.01798159	95.91434219	0	0.803587565	-14.91149338	-9.893598494	12.56699756	6.121332753	0	-1.198599613	2	4
254	f	bachelors degree	63	o	M	crosswords	crosswords.o	53	13.43311889	8	78.75052699	-271.844	103.8502509	-390	109.1082611	6	93.70903787	4	78.64839376	9	90.06668352	3	72.32266178	82.09112983	10	85.57372703	-271.844	103.8502509	-447	94.56585795	12	112.8487574	6	102.2366507	11	97.4198399	4	84.66554136	95.2684108	6.823200042	0	-14.54240319	19.13971957	23.58825693	7.353156381	12.34287958	13.17728097	5	1
255	m	bachelors degree	30	y	Y	lumosity	lumosity.y	62	12.99427819	18	109.8684494	-120.493	120.3248281	-338	125.4947145	12	112.8487574	7	114.8036483	12	102.1387281	5	97.01798159	120.0483363	20	115.7229157	-371.281	96.02637887	-357	119.1978885	7	96.91529003	7	114.8036483	14	113.8168191	6	109.1710722	115.7746464	5.854466341	-24.29844919	-6.296826031	-15.93346741	0	11.678091	12.15309064	-4.273689911	4	5
256	m	bachelors degree	27	y	Y	crosswords	crosswords.y	0	0	11	88.54321663	-232.182	106.9689563	-381	111.8447446	5	90.43034386	6	102.2366507	12	102.1387281	5	97.01798159	99.67950481	7	75.29108861	-610.61	79.9243206	-336	126.0996401	3	83.61639412	6	102.2366507	6	81.96893327	4	84.66554136	83.81790041	-13.25212802	-27.04463568	14.25489548	-6.813949733	0	-20.16979479	-12.35244023	-15.86160439	2	2
257	m	bachelors degree	39	y	Y	lumosity	lumosity.y	58	13.87255167	12	91.65967918	-369.063	96.21903	-521	81.40360985	3	83.61639412	7	114.8036483	13	107.6954863	4	84.66554136	90.10840504	10	85.57372703	-315.17	100.585194	-467	90.54425439	7	96.91529003	6	102.2366507	12	102.1387281	6	109.1710722	96.69037885	-6.085952157	4.366163959	9.140644539	13.2988959	-12.56699756	-5.556758251	24.50553087	6.581973816	4	4
258	m	advanced degree	28	y	Y	lumosity	lumosity.y	64	37.42816064	12	91.65967918	-628.847	78.75052699	-496	85.25687548	2	80.40665395	6	102.2366507	11	97.4198399	6	109.1710722	86.31930425	11	88.54321663	-252.416	106.2137347	-438	96.65600612	7	96.91529003	5	90.01558593	10	93.4066386	6	109.1710722	95.20570551	-3.116462554	27.46320772	11.39913064	16.50863608	-12.22106476	-4.013201299	0	8.886401257	2	4
259	f	advanced degree	48	y	M	crosswords	crosswords.y	53	4.847573334	14	97.84621295	-832.983	67.66696116	-388	109.6336875	2	80.40665395	6	102.2366507	12	102.1387281	7	121.0680766	95.2174691	14	97.84621295	-537.579	84.1929265	-417	101.5417153	5	90.43034386	6	102.2366507	13	107.6954863	5	97.01798159	95.21354823	0	16.52596534	-8.091972202	10.02368991	0	5.556758251	-24.05009504	-0.00392087	4	4
260	f	some college	32	y	Y	crosswords	crosswords.y	59	17.06817361	9	82.29468311	-141.426	118.4287944	-401	105.8259904	11	109.6062241	5	90.01558593	11	97.4198399	5	97.01798159	100.0223584	10	85.57372703	-244.563	106.4459211	-438	96.65600612	4	87.02169153	5	90.01558593	9	90.06668352	5	97.01798159	88.18576902	3.279043918	-11.98287327	-9.169984326	-22.58453253	0	-7.353156381	0	-11.83658942	4	2
261	m	hs grad or less	37	y	Y	crosswords	crosswords.y	54	14.65109806	24	127.258891	-445.551	90.38920093	-421	100.3950446	13	116.0032086	7	114.8036483	11	97.4198399	6	109.1710722	113.2128764	22	121.4547391	-387.362	94.90668691	-426	99.23202524	14	119.1220614	7	114.8036483	13	107.6954863	7	121.0680766	118.8317208	-5.804151954	4.51748598	-1.16301933	3.118852745	0	10.27564642	11.89700439	5.61884435	4	3
262	m	bachelors degree	25	y	Y	lumosity	lumosity.y	28	5.523011806	21	118.4923683	-134.107	119.206344	-359	118.7337831	15	122.4665932	7	114.8036483	11	97.4198399	6	109.1710722	124.6944514	27	136.391296	-38.146	141.5986594	-322	130.8000955	16	125.4160785	9	140.9426022	13	107.6954863	9	144.874283	155.8191895	17.89892769	22.39231541	12.06631236	2.949485361	26.138954	10.27564642	35.70321081	31.12473811	4	4
263	f	advanced degree	32	y	Y	crosswords	crosswords.y	47	13.88389	18	109.8684494	-357.848	96.99137146	-374	114.0404806	18	131.5085227	7	114.8036483	10	93.4066386	6	109.1710722	116.8166923	18	109.8684494	-235.35	106.7661851	-377	113.0162768	15	122.4665932	6	102.2366507	13	107.6954863	6	109.1710722	117.0492449	0	9.774813659	-1.024203819	-9.041929477	-12.56699756	14.28884771	0	0.232552575	2	2
264	f	hs grad or less	57	o	M	crosswords	crosswords.o	2	0.733265	11	88.54321663	-402.742	93.77814388	-486	86.90753509	8	100.0782549	5	90.01558593	0	49.67089059	6	109.1710722	80.04232984	10	85.57372703	-264.024	104.8570837	-489	86.37006083	8	100.0782549	6	102.2366507	13	107.6954863	6	109.1710722	98.81750604	-2.969489603	11.07893979	-0.537474256	0	12.22106476	58.02459573	0	18.77517619	NA	NA
265	f	some college	31	y	Y	lumosity	lumosity.y	20	6.554095218	6	71.50566007	-232.182	106.9689563	-468	90.38004825	7	96.91529003	4	78.64839376	15	120.1949445	4	84.66554136	87.3278265	13	94.8395275	-146.632	117.2932101	-436	97.04838168	6	93.70903787	5	90.01558593	11	97.4198399	5	97.01798159	96.73618217	23.33386742	10.32425382	6.668333436	-3.206252155	11.36719217	-22.77510457	12.35244023	9.40835567	1	2
266	f	bachelors degree	23	y	Y	lumosity	lumosity.y	46	10.9404025	11	88.54321663	-648.621	77.42991416	-456	92.66782893	9	103.2905327	6	102.2366507	14	113.8168191	5	97.01798159	93.75783235	10	85.57372703	-227.897	107.3910175	-368	115.9178826	12	112.8487574	5	90.01558593	10	93.4066386	7	121.0680766	106.3928322	-2.969489603	29.96110332	23.25005363	9.558224734	-12.22106476	-20.41018047	24.05009504	12.63499986	4	5
267	f	bachelors degree	22	y	Y	lumosity	lumosity.y	43	8.808877222	17	106.9689563	-495.998	87.3278265	-426	99.23202524	5	90.43034386	6	102.2366507	12	102.1387281	7	121.0680766	102.10109	14	97.84621295	-161.009	114.9928228	-387	109.9797641	16	125.4160785	6	102.2366507	11	97.4198399	7	121.0680766	116.6431715	-9.122743327	27.66499626	10.74773881	34.98573468	0	-4.718888164	0	14.54208153	1	2
268	f	advanced degree	37	y	Y	lumosity	lumosity.y	4	1.396190694	12	91.65967918	-323.844	99.83603492	-441	95.98777089	4	87.02169153	6	102.2366507	16	127.595966	5	97.01798159	100.1341524	10	85.57372703	-403.523	93.65202668	-385	110.621335	8	100.0782549	7	114.8036483	15	120.1949445	7	121.0680766	111.1057264	-6.085952157	-6.184008249	14.63356411	13.05656332	12.56699756	-7.40102151	24.05009504	10.97157401	3	4
269	f	advanced degree	45	y	M	crosswords	crosswords.y	3	1.000050278	11	88.54321663	-306.514	101.3844593	-463	91.33146433	15	122.4665932	6	102.2366507	6	81.96893327	5	97.01798159	96.18824853	9	82.29468311	-622.506	79.18862422	-569	74.80046366	4	87.02169153	6	102.2366507	13	107.6954863	5	97.01798159	83.00750677	-6.248533522	-22.19583509	-16.53100067	-35.44490165	0	25.72655305	0	-13.18074175	1	2
270	f	advanced degree	58	o	M	crosswords	crosswords.o	63	16.06526861	20	115.7229157	-271.677	104.1862985	-459	92.11688449	11	109.6062241	7	114.8036483	12	102.1387281	4	84.66554136	105.6056034	19	112.8487574	-333.921	99.1947099	-435	97.25327203	8	100.0782549	6	102.2366507	14	113.8168191	6	109.1710722	108.4580105	-2.874158287	-4.991588547	5.136387541	-9.527969208	-12.56699756	11.678091	24.50553087	2.852407146	2	4
271	f	bachelors degree	24	y	Y	crosswords	crosswords.y	47	11.63073639	19	112.8487574	-295.55	102.2215796	-443	95.50283079	19	134.6704795	6	102.2366507	9	90.06668352	5	97.01798159	108.4536424	21	118.4923683	-323.844	99.83603492	-441	95.98777089	19	134.6704795	6	102.2366507	6	81.96893327	4	84.66554136	104.1475685	5.643610847	-2.385544646	0.484940102	0	0	-8.097750249	-12.35244023	-4.306073918	1	2
272	f	bachelors degree	25	y	Y	lumosity	lumosity.y	68	13.13613639	19	112.8487574	-223.123	108.2751593	-365	116.9642084	6	93.70903787	8	127.5555825	14	113.8168191	8	133.0119868	126.3749149	24	127.258891	-142.668	117.9393078	-348	122.2515532	7	96.91529003	8	127.5555825	13	107.6954863	7	121.0680766	129.717598	14.41013357	9.664148466	5.287344824	3.206252155	0	-6.121332753	-11.94391021	3.342683144	4	3
273	f	bachelors degree	26	y	Y	lumosity	lumosity.y	3	0.516529583	14	97.84621295	-327.397	99.61613842	-495	85.37121426	8	100.0782549	5	90.01558593	10	93.4066386	5	97.01798159	90.89173886	14	97.84621295	-118.693	121.0680766	-439	96.43789596	9	103.2905327	5	90.01558593	7	84.57097827	6	109.1710722	100.3689513	0	21.45193821	11.06668169	3.212277852	0	-8.835660325	12.15309064	9.47721241	2	2
274	m	advanced degree	21	y	Y	lumosity	lumosity.y	51	12.31911861	17	106.9689563	-345.455	98.54067692	-364	117.264271	0	70.89374579	5	90.01558593	9	90.06668352	6	109.1710722	95.66238492	18	109.8684494	-263.294	105.0026123	-397	107.0063377	7	96.91529003	7	114.8036483	12	102.1387281	5	97.01798159	107.9988634	2.899493105	6.461935386	-10.25793331	26.02154423	24.78806232	12.07204455	-12.15309064	12.33647846	3	4
275	m	hs grad or less	29	y	Y	lumosity	lumosity.y	37	12.94280556	9	82.29468311	-103.832	123.2148701	-325	129.8784281	2	80.40665395	6	102.2366507	11	97.4198399	6	109.1710722	105.9265808	8	78.75052699	-277.016	103.6349728	-381	111.8447446	7	96.91529003	5	90.01558593	10	93.4066386	5	97.01798159	92.94791472	-3.544156124	-19.57989724	-18.03368347	16.50863608	-12.22106476	-4.013201299	-12.15309064	-12.97866608	1	3
276	m	bachelors degree	24	y	Y	lumosity	lumosity.y	64	20.64439965	23	124.4099523	-202.199	110.1759008	-316	133.1820152	14	119.1220614	8	127.5555825	14	113.8168191	7	121.0680766	136.68077	23	124.4099523	-76.11	130.6183038	-349	121.8885759	10	106.4827223	9	140.9426022	16	127.595966	7	121.0680766	144.2591705	0	20.44240294	-11.29343927	-12.63933906	13.38701972	13.77914691	0	7.578400509	4	5
277	f	advanced degree	41	y	M	lumosity	lumosity.y	42	12.16167972	18	109.8684494	-302.943	101.586676	-425	99.46328321	6	93.70903787	4	78.64839376	14	113.8168191	5	97.01798159	98.46952268	13	94.8395275	-356.547	97.45009021	-393	108.3012051	7	96.91529003	6	102.2366507	14	113.8168191	7	121.0680766	108.4667489	-15.02892189	-4.136585764	8.837921885	3.206252155	23.58825693	0	24.05009504	9.997226232	2	1
278	m	bachelors degree	25	y	Y	crosswords	crosswords.y	55	15.35493944	19	112.8487574	-118.693	121.0680766	-396	107.3069857	14	119.1220614	6	102.2366507	12	102.1387281	6	109.1710722	117.8179969	21	118.4923683	-296.854	102.11238	-364	117.264271	14	119.1220614	6	102.2366507	3	70.96685372	4	84.66554136	103.5008061	5.643610847	-18.95569661	9.957285266	0	0	-31.17187434	-24.50553087	-14.31719084	1	4
279	f	some college	21	y	Y	crosswords	crosswords.y	13	3.555493056	20	115.7229157	-227.133	108.0117536	-361	118.2244304	15	122.4665932	7	114.8036483	12	102.1387281	5	97.01798159	118.9222076	20	115.7229157	-189.432	111.8294817	-452	93.53363859	9	103.2905327	7	114.8036483	8	87.11355617	5	97.01798159	105.6255879	0	3.817728104	-24.6907918	-19.17606047	0	-15.02517189	0	-13.29661973	3	3
280	f	some college	19	y	Y	lumosity	lumosity.y	8	2.607974583	10	85.57372703	-155.402	115.9571997	-344	123.4396335	10	106.4827223	5	90.01558593	4	75.15990345	7	121.0680766	104.0817907	7	75.29108861	-186.398	112.2616031	-384	110.9835584	10	106.4827223	5	90.01558593	13	107.6954863	6	109.1710722	102.8604902	-10.28263842	-3.695596586	-12.45607507	0	0	32.53558286	-11.89700439	-1.221300494	4	3
281	f	bachelors degree	23	y	Y	crosswords	crosswords.y	31	5.834254445	16	103.9697618	-413.265	93.15120252	-336	126.0996401	9	103.2905327	8	127.5555825	11	97.4198399	8	133.0119868	120.3997366	18	109.8684494	-402.418	93.91596242	-419	100.9770084	2	80.40665395	7	114.8036483	10	93.4066386	6	109.1710722	100.4062278	5.898687608	0.764759899	-25.12263169	-22.88387876	-12.75193428	-4.013201299	-23.8409146	-19.99350884	2	2
282	m	bachelors degree	28	y	Y	lumosity	lumosity.y	51	14.06161778	9	82.29468311	-101.001	123.7738898	-480	88.08386544	8	100.0782549	8	127.5555825	16	127.595966	8	133.0119868	119.975745	14	97.84621295	-202.199	110.1759008	-431	98.13198035	11	109.6062241	9	140.9426022	17	137.1423714	9	144.874283	134.1032486	15.55152985	-13.59798894	10.0481149	9.527969208	13.38701972	9.546405435	11.86229621	14.12750352	4	4
283	f	advanced degree	27	y	Y	lumosity	lumosity.y	59	29.27957556	18	109.8684494	-351.792	97.90267308	-366	116.6156143	9	103.2905327	6	102.2366507	13	107.6954863	5	97.01798159	108.4623793	18	109.8684494	-413.265	93.15120252	-445	95.02101858	7	96.91529003	7	114.8036483	11	97.4198399	7	121.0680766	106.8446619	0	-4.751470559	-21.59459573	-6.375242681	12.56699756	-10.27564642	24.05009504	-1.617717405	4	4
284	m	bachelors degree	25	y	Y	lumosity	lumosity.y	55	32.91600903	20	115.7229157	-321.254	100.1527852	-346	122.8514513	2	80.40665395	6	102.2366507	14	113.8168191	5	97.01798159	107.7976783	25	129.8784281	-491.818	87.71235531	-353	120.446814	11	109.6062241	6	102.2366507	15	120.1949445	5	97.01798159	116.26235	14.15551238	-12.44042992	-2.404637287	29.19957011	0	6.378125399	0	8.464671637	4	4
285	m	advanced degree	26	y	Y	crosswords	crosswords.y	51	10.89306917	16	103.9697618	-261.247	105.3347821	-436	97.04838168	6	93.70903787	6	102.2366507	13	107.6954863	6	109.1710722	104.4621022	16	103.9697618	-432.278	91.64662801	-342	124.1068203	8	100.0782549	5	90.01558593	15	120.1949445	5	97.01798159	106.5892573	0	-13.68815411	27.0584386	6.369216984	-12.22106476	12.49945815	-12.15309064	2.127155141	4	4
286	m	advanced degree	25	y	Y	lumosity	lumosity.y	45	11.76109986	7	75.29108861	-294.287	102.330897	-385	110.621335	7	96.91529003	5	90.01558593	16	127.595966	5	97.01798159	99.84348816	16	103.9697618	-84.028	128.9367294	-425	99.46328321	10	106.4827223	5	90.01558593	15	120.1949445	5	97.01798159	111.1057264	28.67867317	26.60583238	-11.15805179	9.567432261	0	-7.40102151	0	11.26223821	4	5
287	m	bachelors degree	26	y	Y	lumosity	lumosity.y	22	4.408600278	16	103.9697618	-353.143	97.57853995	-446	94.76830456	19	134.6704795	7	114.8036483	13	107.6954863	7	121.0680766	118.0004055	17	106.9689563	-417.934	92.60056662	-578	73.83236442	17	128.2711147	8	127.5555825	17	137.1423714	6	109.1710722	118.2244304	2.999194503	-4.977973326	-20.93594014	-6.399364818	12.75193428	29.4468851	-11.89700439	0.224024853	3	3
288	f	some college	43	y	M	lumosity	lumosity.y	38	12.85707306	8	78.75052699	-732.007	73.2862136	-433	97.65778733	2	80.40665395	5	90.01558593	6	81.96893327	4	84.66554136	73.15785695	7	75.29108861	-516.214	85.4608848	-430	98.36085186	3	83.61639412	4	78.64839376	10	93.4066386	5	97.01798159	78.62784794	-3.459438376	12.1746712	0.70306453	3.209740174	-11.36719217	11.43770533	12.35244023	5.469990986	4	2
289	f	hs grad or less	29	y	Y	lumosity	lumosity.y	20	5.539030833	11	88.54321663	-391.296	94.52604736	-364	117.264271	7	96.91529003	7	114.8036483	12	102.1387281	5	97.01798159	102.6217714	12	91.65967918	-373.533	95.87952609	-419	100.9770084	5	90.43034386	7	114.8036483	10	93.4066386	6	109.1710722	98.9296141	3.116462554	1.353478726	-16.28726258	-6.484946169	0	-8.732089463	12.15309064	-3.692157346	1	4
290	f	bachelors degree	32	y	Y	lumosity	lumosity.y	40	10.54056097	17	106.9689563	-209.09	109.6978949	-417	101.5417153	12	112.8487574	6	102.2366507	12	102.1387281	5	97.01798159	107.8916733	14	97.84621295	-477.944	88.66753535	-449	94.14184935	10	106.4827223	6	102.2366507	16	127.595966	5	97.01798159	103.3019851	-9.122743327	-21.03035955	-7.399865951	-6.366035154	0	25.45723791	0	-4.58968813	3	2
291	f	bachelors degree	67	o	O	lumosity	lumosity.o	51	10.97624125	10	85.57372703	-387.938	94.78810047	-475	88.98718796	5	90.43034386	6	102.2366507	11	97.4198399	5	97.01798159	89.2586211	11	88.54321663	-601.241	80.54574021	-437	96.84674887	4	87.02169153	5	90.01558593	10	93.4066386	5	97.01798159	83.65693144	2.969489603	-14.24236027	7.859560908	-3.408652324	-12.22106476	-4.013201299	0	-5.601689667	4	3
292	m	advanced degree	26	y	Y	crosswords	crosswords.y	64	18.54167611	26	132.9285386	-76.11	130.6183038	-454	93.12637837	17	128.2711147	5	90.01558593	7	84.57097827	5	97.01798159	113.5121096	28	139.4590829	-270.266	104.3415007	-369	115.5624496	15	122.4665932	6	102.2366507	13	107.6954863	5	97.01798159	121.5171088	6.530544309	-26.27680305	22.43607127	-5.80452153	12.22106476	23.12450804	0	8.004999224	4	3
293	m	bachelors degree	43	y	M	crosswords	crosswords.y	59	15.72567167	17	106.9689563	-216.89	109.3062128	-402	105.565664	12	112.8487574	6	102.2366507	11	97.4198399	6	109.1710722	110.5591805	20	115.7229157	-161.339	114.6587923	-418	101.2497901	9	103.2905327	6	102.2366507	15	120.1949445	5	97.01798159	112.9458302	8.753959446	5.352579485	-4.315873922	-9.558224734	0	22.77510457	-12.15309064	2.386649748	4	3
294	f	NA	33	y	Y	crosswords	crosswords.y	59	15.5986225	14	97.84621295	-116.13	121.7917755	-483	87.46044138	10	106.4827223	6	102.2366507	13	107.6954863	6	109.1710722	107.9688092	16	103.9697618	-110.016	122.7097698	-437	96.84674887	13	116.0032086	6	102.2366507	14	113.8168191	5	97.01798159	112.560711	6.123548824	0.917994282	9.386307497	9.520486319	0	6.121332753	-12.15309064	4.591901793	3	3
295	m	some college	61	o	M	lumosity	lumosity.o	9	1.78207625	7	75.29108861	-369.063	96.21903	-471	89.77714362	4	87.02169153	4	78.64839376	9	90.06668352	5	97.01798159	79.23729632	11	88.54321663	-507.003	86.12612598	-566	75.29108861	3	83.61639412	0	61.31611067	4	75.15990345	3	72.32266178	64.46599262	13.25212802	-10.09290402	-14.48605501	-3.405297409	-17.33228309	-14.90678006	-24.69531981	-14.7713037	1	1
296	m	bachelors degree	30	y	Y	lumosity	lumosity.y	60	33.93065486	16	103.9697618	-340.249	98.82871971	-413	102.7126304	8	100.0782549	6	102.2366507	12	102.1387281	6	109.1710722	104.4387377	17	106.9689563	-261.277	105.2079414	-419	100.9770084	12	112.8487574	5	90.01558593	11	97.4198399	8	133.0119868	111.1548001	2.999194503	6.379221721	-1.735621949	12.77050259	-12.22106476	-4.718888164	23.8409146	6.716062455	3	3
297	m	advanced degree	60	o	M	crosswords	crosswords.o	46	23.50800083	11	88.54321663	-327.966	99.4931125	-686	63.7485059	5	90.43034386	7	114.8036483	7	84.57097827	4	84.66554136	82.06069224	7	75.29108861	-384.842	94.98950798	-595	71.57329045	6	93.70903787	6	102.2366507	12	102.1387281	4	84.66554136	81.55534319	-13.25212802	-4.50360452	7.824784554	3.278694015	-12.56699756	17.56774979	0	-0.505349056	2	2
298	f	advanced degree	22	y	Y	crosswords	crosswords.y	20	4.722971111	14	97.84621295	-92.704	124.8254264	-482	87.6810564	8	100.0782549	6	102.2366507	16	127.595966	4	84.66554136	106.0233989	17	106.9689563	-274.828	103.7079275	-516	82.12907341	8	100.0782549	4	78.64839376	14	113.8168191	5	97.01798159	95.56515537	9.122743327	-21.11749892	-5.551982982	0	-23.58825693	-13.77914691	12.35244023	-10.45824349	1	2
299	m	advanced degree	32	y	Y	lumosity	lumosity.y	47	14.78458556	24	127.258891	-199.77	110.4544066	-551	77.0409341	0	70.89374579	7	114.8036483	9	90.06668352	5	97.01798159	96.78576813	28	139.4590829	-120.493	120.3248281	-384	110.9835584	10	106.4827223	7	114.8036483	14	113.8168191	6	109.1710722	128.2711147	12.20019189	9.870421473	33.94262431	35.58897649	0	23.75013555	12.15309064	31.48534658	3	4
300	f	bachelors degree	32	y	Y	lumosity	lumosity.y	56	16.17794181	12	91.65967918	-98.626	124.3124216	-469	90.19161952	17	128.2711147	7	114.8036483	13	107.6954863	4	84.66554136	110.1150073	15	100.8687377	-173.992	113.1470924	-410	103.5889406	18	131.5085227	8	127.5555825	14	113.8168191	4	84.66554136	118.1777474	9.209058542	-11.16532916	13.39732105	3.237407947	12.75193428	6.121332753	0	8.062740116	3	3
301	m	advanced degree	36	y	Y	crosswords	crosswords.y	12	1.669768889	11	88.54321663	-86.562	126.1676356	-416	101.8154552	4	87.02169153	5	90.01558593	10	93.4066386	5	97.01798159	95.9954946	9	82.29468311	-321.254	100.1527852	-430	98.36085186	6	93.70903787	5	90.01558593	12	102.1387281	5	97.01798159	90.99458356	-6.248533522	-26.01485034	-3.454603367	6.687346339	0	8.732089463	0	-5.000911042	4	3
302	m	advanced degree	34	y	Y	crosswords	crosswords.y	49	13.14905028	18	109.8684494	-85.302	126.860641	-319	131.9626445	6	93.70903787	6	102.2366507	13	107.6954863	4	84.66554136	113.6468407	19	112.8487574	-188.541	111.9621709	-327	129.3804064	12	112.8487574	5	90.01558593	14	113.8168191	4	84.66554136	113.2183699	2.980308053	-14.89847007	-2.582238151	19.13971957	-12.22106476	6.121332753	0	-0.428470747	2	2
303	m	advanced degree	43	y	M	crosswords	crosswords.y	40	4.7358575	11	88.54321663	-314.989	100.6672464	-414	102.4290109	4	87.02169153	6	102.2366507	13	107.6954863	6	109.1710722	99.37378214	11	88.54321663	-425.646	92.1040469	-461	91.72050148	9	103.2905327	6	102.2366507	16	127.595966	6	109.1710722	103.4625245	0	-8.563199541	-10.70850944	16.26884117	0	19.90047966	0	4.088742404	5	5
304	m	hs grad or less	60	o	M	crosswords	crosswords.o	55	22.63453222	16	103.9697618	-186.398	112.2616031	-457	92.49939293	12	112.8487574	6	102.2366507	11	97.4198399	7	121.0680766	110.2369626	20	115.7229157	-503.418	86.54370761	-425	99.46328321	12	112.8487574	7	114.8036483	13	107.6954863	6	109.1710722	111.1253416	11.75315395	-25.71789546	6.963890277	0	12.56699756	10.27564642	-11.89700439	0.888379005	3	4
305	m	bachelors degree	31	y	Y	crosswords	crosswords.y	36	9.884340555	30	144.5573655	-164.372	114.2088377	-428	98.81002988	10	106.4827223	7	114.8036483	16	127.595966	7	121.0680766	131.5424429	28	139.4590829	-142.668	117.9393078	-405	104.8688661	18	131.5085227	7	114.8036483	17	137.1423714	8	133.0119868	148.6215221	-5.098282631	3.730470063	6.058836205	25.02580037	0	9.546405435	11.94391021	17.07907919	4	3
306	f	NA	54	o	M	lumosity	lumosity.o	42	13.68143125	9	82.29468311	-407.036	93.51727771	-428	98.81002988	5	90.43034386	5	90.01558593	5	78.88184489	3	72.32266178	77.53340682	12	91.65967918	-120.462	120.6949278	-445	95.02101858	8	100.0782549	5	90.01558593	3	70.96685372	5	97.01798159	91.41938837	9.364996075	27.17765011	-3.7890113	9.647910998	0	-7.914991175	24.69531981	13.88598155	4	4
307	m	advanced degree	67	o	O	lumosity	lumosity.o	66	12.67825222	14	97.84621295	-530.614	84.75325368	-398	106.7043604	10	106.4827223	6	102.2366507	3	70.96685372	5	97.01798159	91.5288808	14	97.84621295	-488.833	87.9608503	-396	107.3069857	12	112.8487574	4	78.64839376	13	107.6954863	4	84.66554136	94.35841726	0	3.207596625	0.602625341	6.366035154	-23.58825693	36.7286326	-12.35244023	2.829536462	4	4
308	m	advanced degree	27	y	Y	crosswords	crosswords.y	11	3.626168611	19	112.8487574	-506.549	86.13755301	-502	84.21887411	12	112.8487574	6	102.2366507	15	120.1949445	5	97.01798159	103.6272984	16	103.9697618	-232.029	107.0812315	-409	103.8964838	14	119.1220614	6	102.2366507	13	107.6954863	4	84.66554136	106.9108932	-8.878995662	20.94367853	19.67760967	6.273303911	0	-12.49945815	-12.35244023	3.283594802	3	4
309	m	some college	44	y	M	crosswords	crosswords.y	28	7.502067778	19	112.8487574	-193.626	111.4019867	-400	106.1123696	14	119.1220614	7	114.8036483	13	107.6954863	5	97.01798159	116.6638764	17	106.9689563	-46.462	140.085246	-356	119.4715541	14	119.1220614	7	114.8036483	11	97.4198399	6	109.1710722	126.6413091	-5.879801159	28.68325932	13.35918448	0	0	-10.27564642	12.15309064	9.977432778	4	5
310	m	advanced degree	28	y	Y	crosswords	crosswords.y	1	0.084206111	20	115.7229157	-113.985	122.0300291	-344	123.4396335	16	125.4160785	8	127.5555825	15	120.1949445	6	109.1710722	135.5959531	22	121.4547391	-176.823	113.0054202	-426	99.23202524	16	125.4160785	7	114.8036483	13	107.6954863	5	97.01798159	119.0467198	5.731823328	-9.024608911	-24.20760824	0	-12.75193428	-12.49945815	-12.15309064	-16.5492333	2	5
311	f	bachelors degree	64	o	M	crosswords	crosswords.o	56	13.61042417	18	109.8684494	-528.701	84.8900437	-445	95.02101858	7	96.91529003	5	90.01558593	10	93.4066386	4	84.66554136	88.74175411	16	103.9697618	-440.892	90.88725766	-443	95.50283079	6	93.70903787	4	78.64839376	11	97.4198399	5	97.01798159	89.50279329	-5.898687608	5.997213964	0.481812202	-3.206252155	-11.36719217	4.013201299	12.35244023	0.761039183	3	3
312	f	hs grad or less	42	y	M	crosswords	crosswords.y	42	6.720481666	16	103.9697618	-669.873	76.4203778	-384	110.9835584	8	100.0782549	6	102.2366507	7	84.57097827	5	97.01798159	93.81467592	17	106.9689563	-98.626	124.3124216	-451	93.74563994	12	112.8487574	5	90.01558593	10	93.4066386	6	109.1710722	107.4036422	2.999194503	47.89204376	-17.23791846	12.77050259	-12.22106476	8.835660325	12.15309064	13.58896628	4	3
313	m	hs grad or less	34	y	Y	lumosity	lumosity.y	59	11.50227472	25	129.8784281	-727.86	73.53721221	-380	112.1319449	16	125.4160785	7	114.8036483	11	97.4198399	6	109.1710722	114.9498981	27	136.391296	-252.055	106.2543601	-361	118.2244304	13	116.0032086	6	102.2366507	12	102.1387281	6	109.1710722	121.8777753	6.512867873	32.71714785	6.092485491	-9.412869933	-12.56699756	4.718888164	0	6.92787718	3	2
314	f	bachelors degree	49	y	M	crosswords	crosswords.y	61	15.91940889	19	112.8487574	-391.972	94.43832771	-410	103.5889406	9	103.2905327	7	114.8036483	10	93.4066386	6	109.1710722	107.6530118	15	100.8687377	-357.241	97.17365544	-411	103.29435	10	106.4827223	5	90.01558593	5	78.88184489	5	97.01798159	93.47634169	-11.98001971	2.735327728	-0.2945906	3.19218958	-24.78806232	-14.52479371	-12.15309064	-14.17667007	3	2
315	m	bachelors degree	27	y	Y	lumosity	lumosity.y	45	17.82515792	11	88.54321663	-305.02	101.4593231	-391	108.8231249	16	125.4160785	8	127.5555825	12	102.1387281	6	109.1710722	115.1595523	18	109.8684494	-172.714	113.5568984	-433	97.65778733	7	96.91529003	6	102.2366507	11	97.4198399	7	121.0680766	109.5559578	21.32523276	12.0975753	-11.16533759	-28.50078851	-25.31893183	-4.718888164	11.89700439	-5.603594431	2	5
316	m	some college	45	y	M	crosswords	crosswords.y	27	12.05310333	18	109.8684494	-146.632	117.2932101	-364	117.264271	15	122.4665932	6	102.2366507	15	120.1949445	6	109.1710722	124.0797466	3	57.8512193	-371.913	95.98004611	-442	95.75943256	16	125.4160785	6	102.2366507	13	107.6954863	6	109.1710722	98.46577678	-52.01723009	-21.31316399	-21.50483844	2.949485361	0	-12.49945815	0	-25.61396986	4	4
317	m	bachelors degree	43	y	M	lumosity	lumosity.y	38	8.783081806	23	124.4099523	-335.872	98.98191037	-367	116.2690585	14	119.1220614	8	127.5555825	6	81.96893327	6	109.1710722	118.6770197	20	115.7229157	-606.051	80.25700505	-367	116.2690585	18	131.5085227	7	114.8036483	2	66.18670658	5	97.01798159	105.1565191	-8.687036577	-18.72490532	0	12.3864613	-12.75193428	-15.78222669	-12.15309064	-13.52050063	5	3
319	m	some college	39	y	Y	crosswords	crosswords.y	11	2.982920278	22	121.4547391	-517.912	85.39517744	-384	110.9835584	12	112.8487574	6	102.2366507	11	97.4198399	7	121.0680766	112.3450671	23	124.4099523	-227.897	107.3910175	-369	115.5624496	7	96.91529003	5	90.01558593	12	102.1387281	6	109.1710722	111.0176917	2.955213248	21.99584004	4.578891223	-15.93346741	-12.22106476	4.718888164	-11.89700439	-1.327375351	4	5
320	m	advanced degree	67	o	O	lumosity	lumosity.o	63	28.80246806	15	100.8687377	-500.95	86.76513901	-397	107.0063377	4	87.02169153	6	102.2366507	12	102.1387281	5	97.01798159	95.72451607	12	91.65967918	-667.005	76.91995951	-467	90.54425439	8	100.0782549	4	78.64839376	9	90.06668352	5	97.01798159	81.65021041	-9.209058542	-9.845179498	-16.46208331	13.05656332	-23.58825693	-12.07204455	0	-14.07430567	2	3
321	f	NA	26	y	Y	lumosity	lumosity.y	46	8.740851667	16	103.9697618	-50.811	134.2531421	-421	100.3950446	12	112.8487574	6	102.2366507	14	113.8168191	5	97.01798159	115.5880044	17	106.9689563	-323.645	99.93665093	-386	110.2934782	14	119.1220614	5	90.01558593	15	120.1949445	5	97.01798159	110.5735077	2.999194503	-34.31649119	9.898433619	6.273303911	-12.22106476	6.378125399	0	-5.014496649	2	3
322	f	bachelors degree	24	y	Y	crosswords	crosswords.y	33	6.604842778	14	97.84621295	-680.954	75.93376081	-388	109.6336875	10	106.4827223	6	102.2366507	12	102.1387281	5	97.01798159	97.69550109	17	106.9689563	-271.844	103.8502509	-291	144.5573655	5	90.43034386	7	114.8036483	10	93.4066386	5	97.01798159	112.2563992	9.122743327	27.91649011	34.92367802	-16.05237843	12.56699756	-8.732089463	0	14.56089809	2	4
323	f	some college	42	y	M	crosswords	crosswords.y	62	26.51771556	19	112.8487574	-853.81	66.94590291	-323	130.5586937	4	87.02169153	5	90.01558593	9	90.06668352	4	84.66554136	90.55788695	17	106.9689563	-671.438	76.29130853	-348	122.2515532	7	96.91529003	6	102.2366507	10	93.4066386	4	84.66554136	95.61962661	-5.879801159	9.345405618	-8.307140462	9.893598494	12.22106476	3.339955082	0	5.061739662	3	5
324	m	bachelors degree	32	y	Y	lumosity	lumosity.y	42	19.42227619	17	106.9689563	-402.671	93.87953147	-425	99.46328321	10	106.4827223	5	90.01558593	12	102.1387281	5	97.01798159	98.8062917	19	112.8487574	-38.146	141.5986594	-423	99.9031128	8	100.0782549	7	114.8036483	15	120.1949445	5	97.01798159	120.9686181	5.879801159	47.71912797	0.439829592	-6.404467432	24.78806232	18.0562164	0	22.16232643	1	3
325	f	hs grad or less	63	o	M	lumosity	lumosity.o	48	13.62059264	9	82.29468311	-462.378	89.43126911	-400	106.1123696	8	100.0782549	5	90.01558593	12	102.1387281	3	72.32266178	85.70924269	5	67.59046395	-202.199	110.1759008	-428	98.81002988	11	109.6062241	6	102.2366507	2	66.18670658	4	84.66554136	84.94564244	-14.70421916	20.74463173	-7.302339764	9.527969208	12.22106476	-35.95202148	12.34287958	-0.763600247	5	1
326	f	hs grad or less	21	y	Y	lumosity	lumosity.y	31	17.42245931	8	78.75052699	-496.92	87.17811182	-404	105.1012089	4	87.02169153	5	90.01558593	7	84.57097827	5	97.01798159	82.84368273	9	82.29468311	-842.979	67.39544518	-406	104.6415947	0	70.89374579	6	102.2366507	13	107.6954863	5	97.01798159	83.41188693	3.544156124	-19.78266664	-0.459614179	-16.12794574	12.22106476	23.12450804	0	0.568204197	5	3
327	f	some college	60	o	M	crosswords	crosswords.o	57	13.74079417	6	71.50566007	-413.265	93.15120252	-435	97.25327203	3	83.61639412	4	78.64839376	9	90.06668352	4	84.66554136	76.13407106	11	88.54321663	-307.241	101.2049233	-404	105.1012089	5	90.43034386	5	90.01558593	5	78.88184489	5	97.01798159	87.8163011	17.03755656	8.053720785	7.847936837	6.813949733	11.36719217	-11.18483862	12.35244023	11.68223004	4	NA
328	m	bachelors degree	38	y	Y	crosswords	crosswords.y	53	12.44638972	16	103.9697618	-331.264	99.38870045	-454	93.12637837	8	100.0782549	5	90.01558593	16	127.595966	6	109.1710722	105.6375834	19	112.8487574	-263.294	105.0026123	-443	95.50283079	9	103.2905327	7	114.8036483	13	107.6954863	6	109.1710722	111.5718556	8.878995662	5.613911856	2.376452421	3.212277852	24.78806232	-19.90047966	0	5.93427221	1	3
329	f	NA	35	y	Y	crosswords	crosswords.y	65	20.73047556	7	75.29108861	-509.644	85.93640305	-542	78.17605863	9	103.2905327	5	90.01558593	4	75.15990345	5	97.01798159	77.3019459	7	75.29108861	-221.795	108.6465268	-510	82.87947047	4	87.02169153	5	90.01558593	11	97.4198399	4	84.66554136	81.89966869	0	22.71012379	4.703411839	-16.26884117	0	22.25993644	-12.35244023	4.597722787	1	NA
330	f	hs grad or less	29	y	Y	crosswords	crosswords.y	9	2.354075833	14	97.84621295	-320.396	100.3987723	-428	98.81002988	5	90.43034386	5	90.01558593	9	90.06668352	5	97.01798159	91.19458961	14	97.84621295	-295.55	102.2215796	-409	103.8964838	4	87.02169153	5	90.01558593	6	81.96893327	6	109.1710722	93.08910678	0	1.822807294	5.086453899	-3.408652324	0	-8.097750249	12.15309064	1.894517166	4	4
332	NA	NA	24	y	Y	lumosity	lumosity.y	47	10.91020069	13	94.8395275	-560.092	83.16932861	-567	75.14520953	4	87.02169153	6	102.2366507	8	87.11355617	5	97.01798159	82.13664842	17	106.9689563	-459.105	89.50279329	-470	89.9830089	4	87.02169153	5	90.01558593	12	102.1387281	5	97.01798159	90.71636283	12.12942879	6.333464686	14.83779936	0	-12.22106476	15.02517189	0	8.579714414	4	4
333	f	advanced degree	29	y	Y	crosswords	crosswords.y	32	7.936290834	15	100.8687377	-173.992	113.1470924	-353	120.446814	14	119.1220614	5	90.01558593	14	113.8168191	6	109.1710722	116.0163817	20	115.7229157	-379.127	95.38185455	-344	123.4396335	16	125.4160785	6	102.2366507	13	107.6954863	6	109.1710722	119.2148057	14.854178	-17.76523784	2.992819474	6.294017188	12.22106476	-6.121332753	0	3.19842399	4	1
334	m	advanced degree	58	o	M	lumosity	lumosity.o	59	12.02793476	12	91.65967918	-856.504	66.64358292	-465	90.96779549	0	70.89374579	4	78.64839376	9	90.06668352	3	72.32266178	67.35577233	12	91.65967918	-957.026	61.71659081	-336	126.0996401	2	80.40665395	5	90.01558593	7	84.57097827	5	97.01798159	83.28768848	0	-4.926992118	35.13184462	9.512908155	11.36719217	-5.495705243	24.69531981	15.93191615	2	2
335	f	advanced degree	58	o	M	lumosity	lumosity.o	63	25.79661472	10	85.57372703	-290.774	102.6369078	-472	89.57882363	4	87.02169153	4	78.64839376	13	107.6954863	6	109.1710722	90.16391501	11	88.54321663	-307.241	101.2049233	-480	88.08386544	6	93.70903787	6	102.2366507	16	127.595966	6	109.1710722	102.4743291	2.969489603	-1.431984529	-1.494958191	6.687346339	23.58825693	19.90047966	0	12.31041407	1	3
336	m	hs grad or less	30	y	Y	lumosity	lumosity.y	43	8.046161528	13	94.8395275	-280.5	103.454871	-389	109.3559537	14	119.1220614	6	102.2366507	14	113.8168191	5	97.01798159	109.7991531	12	91.65967918	-280.738	103.3554553	-401	105.8259904	7	96.91529003	7	114.8036483	5	78.88184489	6	109.1710722	100.0260848	-3.179848312	-0.09941561	-3.529963215	-22.20677133	12.56699756	-34.93497417	12.15309064	-9.773068235	3	4
337	m	advanced degree	28	y	Y	crosswords	crosswords.y	3	0.613040278	7	75.29108861	-446.616	90.32505665	-381	111.8447446	9	103.2905327	7	114.8036483	10	93.4066386	7	121.0680766	102.3195827	14	97.84621295	-427.867	92.01831437	-423	99.9031128	12	112.8487574	8	127.5555825	13	107.6954863	6	109.1710722	111.3027439	22.55512434	1.693257711	-11.94163183	9.558224734	12.75193428	14.28884771	-11.89700439	8.983161291	4	4
338	f	some college	20	y	Y	lumosity	lumosity.y	32	2.600442124	17	106.9689563	-110.016	122.7097698	-404	105.1012089	5	90.43034386	5	90.01558593	12	102.1387281	4	84.66554136	100.3055863	15	100.8687377	-139.313	118.7094231	-455	92.86039548	0	70.89374579	5	90.01558593	9	90.06668352	5	97.01798159	90.18700443	-6.100218555	-4.000346623	-12.24081339	-19.53659806	0	-12.07204455	12.35244023	-10.1185819	5	2
339	f	bachelors degree	47	y	M	lumosity	lumosity.y	23	12.7959825	15	100.8687377	-490.171	87.8163011	-485	87.0811887	12	112.8487574	6	102.2366507	8	87.11355617	6	109.1710722	96.67128505	11	88.54321663	-214.467	109.3921935	-330	128.4943399	9	103.2905327	6	102.2366507	7	84.57097827	8	133.0119868	111.9161346	-12.3255211	21.57589242	41.41315123	-9.558224734	0	-2.542577902	23.8409146	15.24484951	3	3
340	f	advanced degree	32	y	Y	lumosity	lumosity.y	35	8.787053194	21	118.4923683	-448.592	90.04811594	-421	100.3950446	11	109.6062241	6	102.2366507	11	97.4198399	5	97.01798159	103.5506062	21	118.4923683	-745.431	72.32266178	-439	96.43789596	8	100.0782549	7	114.8036483	13	107.6954863	7	121.0680766	107.4457626	0	-17.72545416	-3.957148611	-9.527969208	12.56699756	10.27564642	24.05009504	3.895156424	1	2
341	m	advanced degree	31	y	Y	lumosity	lumosity.y	63	16.49178042	17	106.9689563	-120.462	120.6949278	-328	129.2296594	13	116.0032086	6	102.2366507	13	107.6954863	6	109.1710722	122.3528417	21	118.4923683	-483.683	88.25677819	-332	127.6365504	17	128.2711147	6	102.2366507	13	107.6954863	6	109.1710722	119.8230227	11.52341201	-32.43814962	-1.593108979	12.2679061	0	0	0	-2.529819052	3	3
342	m	bachelors degree	44	y	M	crosswords	crosswords.y	42	12.23978833	16	103.9697618	-260.226	105.4580238	-442	95.75943256	0	70.89374579	6	102.2366507	10	93.4066386	4	84.66554136	89.21041069	18	109.8684494	-66.897	131.4411616	-444	95.25665989	9	103.2905327	6	102.2366507	8	87.11355617	4	84.66554136	103.2714496	5.898687608	25.98313778	-0.502772678	32.39678691	0	-6.293082423	0	14.0610389	3	5
343	f	hs grad or less	19	y	Y	lumosity	lumosity.y	44	9.028214672	5	67.59046395	-529.175	84.84044773	-411	103.29435	3	83.61639412	7	114.8036483	7	84.57097827	5	97.01798159	84.29643512	6	71.50566007	-555.775	83.35682848	-387	109.9797641	6	93.70903787	8	127.5555825	11	97.4198399	6	109.1710722	98.12822487	3.915196125	-1.48361926	6.685414084	10.09264375	12.75193428	12.84886162	12.15309064	13.83178976	1	1
344	m	bachelors degree	29	y	Y	lumosity	lumosity.y	43	8.438295572	18	109.8684494	-161.009	114.9928228	-502	84.21887411	14	119.1220614	8	127.5555825	5	78.88184489	7	121.0680766	113.2458639	14	97.84621295	-154.501	116.3565677	-370	115.2217812	13	116.0032086	8	127.5555825	12	102.1387281	7	121.0680766	123.2643672	-12.02223643	1.363744969	31.00290714	-3.118852745	0	23.25688317	0	10.01850329	4	3
345	NA	NA	25	y	Y	lumosity	lumosity.y	44	18.50577208	14	97.84621295	-84.028	128.9367294	-399	106.4132415	5	90.43034386	6	102.2366507	13	107.6954863	7	121.0680766	112.9728912	18	109.8684494	-601.241	80.54574021	-321	131.0180689	1	77.29023023	6	102.2366507	16	127.595966	5	97.01798159	106.2218561	12.02223643	-48.39098916	24.60482735	-13.14011363	0	19.90047966	-24.05009504	-6.751035081	2	4
346	NA	NA	18	y	Y	lumosity	lumosity.y	65	13.21581708	18	109.8684494	-236.579	106.6632072	-480	88.08386544	8	100.0782549	6	102.2366507	11	97.4198399	7	121.0680766	106.1772108	17	106.9689563	-110.016	122.7097698	-425	99.46328321	7	96.91529003	6	102.2366507	11	97.4198399	5	97.01798159	105.4421011	-2.899493105	16.0465626	11.37941777	-3.162964829	0	0	-24.05009504	-0.735109731	3	3
347	m	bachelors degree	53	o	M	lumosity	lumosity.o	55	10.39073685	10	85.57372703	-419.868	92.43598595	-435	97.25327203	9	103.2905327	6	102.2366507	15	120.1949445	4	84.66554136	96.33431999	13	94.8395275	-349.128	98.1357357	-500	84.58362209	9	103.2905327	6	102.2366507	12	102.1387281	3	72.32266178	89.56933451	9.265800469	5.699749751	-12.66964995	0	0	-18.0562164	-12.34287958	-6.76498548	4	4
348	f	some college	36	y	Y	lumosity	lumosity.y	64	19.15236764	11	88.54321663	-414.952	93.01028162	-416	101.8154552	7	96.91529003	4	78.64839376	13	107.6954863	4	84.66554136	87.82148302	10	85.57372703	-192.333	111.5969615	-443	95.50283079	6	93.70903787	6	102.2366507	11	97.4198399	5	97.01798159	95.73615747	-2.969489603	18.58667986	-6.312624446	-3.206252155	23.58825693	-10.27564642	12.35244023	7.91467445	2	3
349	m	bachelors degree	52	o	M	crosswords	crosswords.o	5	1.708785	6	71.50566007	-243.907	106.5400463	-436	97.04838168	0	70.89374579	5	90.01558593	5	78.88184489	5	97.01798159	78.63812586	11	88.54321663	-413.265	93.15120252	-385	110.621335	4	87.02169153	4	78.64839376	10	93.4066386	4	84.66554136	84.35433146	17.03755656	-13.38884379	13.57295332	16.12794574	-11.36719217	14.52479371	-12.35244023	5.716205599	3	4
350	f	bachelors degree	25	y	Y	lumosity	lumosity.y	19	3.731514167	18	109.8684494	-703.338	74.70830478	-397	107.0063377	0	70.89374579	8	127.5555825	9	90.06668352	8	133.0119868	103.0694874	12	91.65967918	-110.016	122.7097698	-380	112.1319449	8	100.0782549	7	114.8036483	10	93.4066386	7	121.0680766	113.2954656	-18.2087702	48.00146499	5.125607212	29.18450906	-12.75193428	3.339955082	-11.94391021	10.22597824	2	3
351	m	some college	33	y	Y	crosswords	crosswords.y	60	24.52406333	9	82.29468311	-151.86	116.747015	-445	95.02101858	7	96.91529003	6	102.2366507	15	120.1949445	6	109.1710722	105.3824454	12	91.65967918	-274.828	103.7079275	-422	100.1304258	7	96.91529003	7	114.8036483	14	113.8168191	7	121.0680766	110.2134573	9.364996075	-13.03908753	5.109407227	0	12.56699756	-6.378125399	11.89700439	4.831011859	4	4
352	f	bachelors degree	68	o	O	lumosity	lumosity.o	62	27.32159444	11	88.54321663	-415.047	92.98119217	-456	92.66782893	3	83.61639412	5	90.01558593	10	93.4066386	0	59.35814637	76.29130853	9	82.29468311	-196.785	110.9300349	-443	95.50283079	16	125.4160785	5	90.01558593	7	84.57097827	5	97.01798159	96.35351377	-6.248533522	17.94884277	2.835001858	41.79968442	0	-8.835660325	37.65983522	20.06220523	2	4
353	m	bachelors degree	27	y	Y	crosswords	crosswords.y	49	14.73646306	21	118.4923683	-155.402	115.9571997	-513	82.48766262	12	112.8487574	7	114.8036483	12	102.1387281	8	133.0119868	119.4629037	20	115.7229157	-224.829	108.1712241	-394	107.9902732	14	119.1220614	7	114.8036483	4	75.15990345	6	109.1710722	112.0288676	-2.76945256	-7.785975575	25.50261058	6.273303911	0	-26.97882461	-23.8409146	-7.434036159	2	4
354	m	bachelors degree	19	y	Y	lumosity	lumosity.y	5	1.052569167	18	109.8684494	-65.63	132.1453918	-439	96.43789596	8	100.0782549	5	90.01558593	11	97.4198399	5	97.01798159	105.4938724	16	103.9697618	-227.431	107.7337662	-404	105.1012089	3	83.61639412	7	114.8036483	13	107.6954863	6	109.1710722	107.7678351	-5.898687608	-24.41162559	8.663312913	-16.46186073	24.78806232	10.27564642	12.15309064	2.273962755	2	1
355	f	some college	57	o	M	lumosity	lumosity.o	45	9.986384583	8	78.75052699	-205.852	109.937957	-480	88.08386544	3	83.61639412	5	90.01558593	9	90.06668352	3	72.32266178	78.9618581	8	78.75052699	-482.726	88.35776591	-443	95.50283079	3	83.61639412	5	90.01558593	11	97.4198399	4	84.66554136	80.08739072	0	-21.58019104	7.418965345	0	0	7.353156381	12.34287958	1.125532622	5	1
357	m	some college	52	o	M	crosswords	crosswords.o	67	22.85842917	16	103.9697618	-500.792	86.80359336	-434	97.43874756	7	96.91529003	8	127.5555825	14	113.8168191	5	97.01798159	105.6856017	20	115.7229157	-346.854	98.34210698	-491	86.02866905	8	100.0782549	8	127.5555825	12	102.1387281	4	84.66554136	103.4472183	11.75315395	11.53851362	-11.41007851	3.162964829	0	-11.678091	-12.35244023	-2.238383412	3	3
358	m	some college	63	o	M	crosswords	crosswords.o	69	17.08841917	10	85.57372703	-194.564	111.2483709	-500	84.58362209	5	90.43034386	4	78.64839376	11	97.4198399	4	84.66554136	83.51452357	12	91.65967918	-547.472	83.78451915	-509	83.02872605	1	77.29023023	4	78.64839376	9	90.06668352	4	84.66554136	73.74660672	6.085952157	-27.46385174	-1.554896034	-13.14011363	0	-7.353156381	0	-9.767916846	NA	4
359	m	advanced degree	52	o	M	lumosity	lumosity.o	53	10.90294833	12	91.65967918	-146.632	117.2932101	-494	85.51443857	8	100.0782549	7	114.8036483	11	97.4198399	6	109.1710722	103.7194546	10	85.57372703	-202.199	110.1759008	-473	89.38345258	5	90.43034386	4	78.64839376	12	102.1387281	7	121.0680766	94.46226999	-6.085952157	-7.117309259	3.869014015	-9.647910998	-36.15525449	4.718888164	11.89700439	-9.257184649	3	4
360	m	some college	34	y	Y	crosswords	crosswords.y	58	15.9967075	12	91.65967918	-479.557	88.6129315	-380	112.1319449	6	93.70903787	6	102.2366507	8	87.11355617	5	97.01798159	93.17600793	15	100.8687377	-509.644	85.93640305	-338	125.4947145	5	90.43034386	6	102.2366507	12	102.1387281	5	97.01798159	100.7866318	9.209058542	-2.676528443	13.36276959	-3.278694015	0	15.02517189	0	7.610623885	4	2
361	m	bachelors degree	30	y	Y	lumosity	lumosity.y	46	13.84494944	14	97.84621295	-666.459	76.99272376	-446	94.76830456	6	93.70903787	6	102.2366507	12	102.1387281	5	97.01798159	91.21229188	10	85.57372703	-416.919	92.84369765	-435	97.25327203	1	77.29023023	6	102.2366507	9	90.06668352	5	97.01798159	85.6798822	-12.27248593	15.8509739	2.484967474	-16.41880764	0	-12.07204455	0	-5.532409673	3	4
362	m	some college	21	y	Y	crosswords	crosswords.y	59	14.80532194	15	100.8687377	-578.91	82.07592026	-516	82.12907341	8	100.0782549	6	102.2366507	11	97.4198399	4	84.66554136	87.38099079	7	75.29108861	-970.253	61.71659081	-450	93.96044048	9	103.2905327	5	90.01558593	11	97.4198399	5	97.01798159	80.17697733	-25.57764912	-20.35932946	11.83136706	3.212277852	-12.22106476	0	12.35244023	-7.204013453	3	2
363	m	advanced degree	54	o	M	crosswords	crosswords.o	27	7.226933611	9	82.29468311	-496.92	87.17811182	-449	94.14184935	6	93.70903787	5	90.01558593	9	90.06668352	4	84.66554136	80.84429814	10	85.57372703	-782.664	70.22917154	-417	101.5417153	2	80.40665395	0	61.31611067	4	75.15990345	5	97.01798159	70.22917154	3.279043918	-16.94894028	7.399865951	-13.30238392	-28.69947526	-14.90678006	12.35244023	-10.61512659	3	3
364	f	some college	25	y	Y	crosswords	crosswords.y	24	9.383764445	12	91.65967918	-47.359	136.9072026	-423	99.9031128	4	87.02169153	5	90.01558593	13	107.6954863	6	109.1710722	105.2871726	13	94.8395275	-146.632	117.2932101	-379	112.4394233	10	106.4827223	6	102.2366507	15	120.1949445	4	84.66554136	109.4284883	3.179848312	-19.61399247	12.53631054	19.46103075	12.22106476	12.49945815	-24.50553087	4.141315644	5	4
365	f	hs grad or less	44	y	M	crosswords	crosswords.y	38	9.091168055	6	71.50566007	-485.034	88.10939276	-597	71.32242434	3	83.61639412	5	90.01558593	9	90.06668352	5	97.01798159	74.26507496	8	78.75052699	-313.294	100.8500751	-406	104.6415947	6	93.70903787	6	102.2366507	13	107.6954863	5	97.01798159	96.16900196	7.244866913	12.74068234	33.31917035	10.09264375	12.22106476	17.6288028	0	21.903927	1	2
366	m	advanced degree	48	y	M	lumosity	lumosity.y	59	26.59646486	10	85.57372703	-331.264	99.38870045	-458	92.30876391	13	116.0032086	6	102.2366507	7	84.57097827	5	97.01798159	94.3784098	16	103.9697618	-367.027	96.37270158	-417	101.5417153	5	90.43034386	7	114.8036483	8	87.11355617	5	97.01798159	97.6841885	18.39603475	-3.015998872	9.23295139	-25.57286475	12.56699756	2.542577902	0	3.305778698	2	5
367	m	advanced degree	29	y	Y	lumosity	lumosity.y	43	12.14662056	14	97.84621295	-853.783	67.07146141	-453	93.3614607	3	83.61639412	5	90.01558593	12	102.1387281	6	109.1710722	85.93061876	13	94.8395275	-509.644	85.93640305	-448	94.35441755	10	106.4827223	6	102.2366507	14	113.8168191	5	97.01798159	98.60057075	-3.006685458	18.86494164	0.992956852	22.86632816	12.22106476	11.678091	-12.15309064	12.66995199	2	2
368	f	bachelors degree	58	o	M	lumosity	lumosity.o	14	2.692410556	5	67.59046395	-290.774	102.6369078	-575	74.08463245	7	96.91529003	4	78.64839376	8	87.11355617	3	72.32266178	72.13653651	9	82.29468311	-465.891	89.35950383	-522	81.27434236	7	96.91529003	4	78.64839376	12	102.1387281	3	72.32266178	76.76041299	14.70421916	-13.27740401	7.189709903	0	0	15.02517189	0	4.62387648	4	3
369	m	bachelors degree	22	y	Y	crosswords	crosswords.y	47	10.25170556	17	106.9689563	-363.265	96.62925964	-391	108.8231249	18	131.5085227	7	114.8036483	14	113.8168191	8	133.0119868	126.1335707	20	115.7229157	-134.107	119.206344	-401	105.8259904	15	122.4665932	7	114.8036483	13	107.6954863	7	121.0680766	126.4981927	8.753959446	22.57708438	-2.99713448	-9.041929477	0	-6.121332753	-11.94391021	0.364621936	3	2
370	m	hs grad or less	27	y	Y	lumosity	lumosity.y	12	2.357647361	9	82.29468311	-255.02	105.7617501	-468	90.38004825	5	90.43034386	5	90.01558593	5	78.88184489	3	72.32266178	78.43063078	7	75.29108861	-427.878	91.89784845	-431	98.13198035	10	106.4827223	4	78.64839376	4	75.15990345	5	97.01798159	81.0032422	-7.0035945	-13.86390169	7.7519321	16.05237843	-11.36719217	-3.721941439	24.69531981	2.572611419	2	2
371	f	some college	66	o	O	lumosity	lumosity.o	60	21.93097125	15	100.8687377	-595.806	80.83587294	-522	81.27434236	2	80.40665395	4	78.64839376	12	102.1387281	4	84.66554136	78.13301405	15	100.8687377	-619.236	79.42028611	-487	86.71556951	8	100.0782549	4	78.64839376	5	78.88184489	0	59.35814637	72.83767717	0	-1.415586836	5.441227153	19.67160091	0	-23.25688317	-25.30739499	-5.295336885	2	3
372	m	advanced degree	27	y	Y	crosswords	crosswords.y	57	8.745664167	14	97.84621295	-313.294	100.8500751	-333	127.1431437	4	87.02169153	8	127.5555825	15	120.1949445	6	109.1710722	116.8027279	15	100.8687377	-193.626	111.4019867	-368	115.9178826	15	122.4665932	6	102.2366507	12	102.1387281	6	109.1710722	115.4670191	3.022524772	10.55191156	-11.22526113	35.44490165	-25.31893183	-18.0562164	0	-1.335708747	5	5
373	f	NA	18	y	Y	lumosity	lumosity.y	36	7.491844861	21	118.4923683	-546.207	83.84454783	-390	109.1082611	9	103.2905327	5	90.01558593	12	102.1387281	5	97.01798159	100.7381259	19	112.8487574	-660.251	77.24322844	-408	104.1320842	11	109.6062241	6	102.2366507	13	107.6954863	4	84.66554136	99.52666805	-5.643610847	-6.601319391	-4.976176931	6.315691356	12.22106476	5.556758251	-12.35244023	-1.211457874	3	1
374	m	some college	54	o	M	crosswords	crosswords.o	56	31.43277694	7	75.29108861	-327.966	99.4931125	-488	86.53255909	8	100.0782549	5	90.01558593	11	97.4198399	6	109.1710722	89.67820917	9	82.29468311	-604.567	80.26586239	-451	93.74563994	4	87.02169153	4	78.64839376	11	97.4198399	7	121.0680766	85.28704751	7.0035945	-19.22725011	7.213080851	-13.05656332	-11.36719217	0	11.89700439	-4.391161652	1	4
375	f	advanced degree	42	y	M	lumosity	lumosity.y	69	75.30589514	6	71.50566007	-101.001	123.7738898	-420	100.6933581	7	96.91529003	5	90.01558593	13	107.6954863	6	109.1710722	99.83603492	11	88.54321663	-493.156	87.57633682	-537	78.95188917	3	83.61639412	6	102.2366507	8	87.11355617	5	97.01798159	81.65021041	17.03755656	-36.19755296	-21.74146895	-13.2988959	12.22106476	-20.58193014	-12.15309064	-18.18582452	2	4
376	NA	bachelors degree	48	y	M	crosswords	crosswords.y	50	18.14329917	19	112.8487574	-188.541	111.9621709	-472	89.57882363	13	116.0032086	6	102.2366507	13	107.6954863	5	97.01798159	109.2160359	17	106.9689563	-491.818	87.71235531	-414	102.4290109	15	122.4665932	5	90.01558593	10	93.4066386	5	97.01798159	99.89938632	-5.879801159	-24.24981561	12.85018728	6.463384573	-12.22106476	-14.28884771	0	-9.316649577	5	5
377	f	advanced degree	54	o	M	lumosity	lumosity.o	55	14.40804347	16	103.9697618	-491.818	87.71235531	-516	82.12907341	6	93.70903787	7	114.8036483	12	102.1387281	6	109.1710722	98.31210976	19	112.8487574	-408.93	93.36557027	-458	92.30876391	10	106.4827223	6	102.2366507	12	102.1387281	5	97.01798159	101.3245932	8.878995662	5.653214953	10.1796905	12.77368442	-12.56699756	0	-12.15309064	3.012483449	3	5
378	f	bachelors degree	21	y	Y	crosswords	crosswords.y	56	17.31910167	19	112.8487574	-202.199	110.1759008	-395	107.6275565	12	112.8487574	6	102.2366507	14	113.8168191	4	84.66554136	110.7317501	16	103.9697618	-111.781	122.2964448	-363	117.5640076	11	109.6062241	6	102.2366507	17	137.1423714	6	109.1710722	125.0630564	-8.878995662	12.120544	9.936451117	-3.242533378	0	23.32555234	24.50553087	14.33130623	4	4
379	m	some college	68	o	O	lumosity	lumosity.o	38	8.11306375	14	97.84621295	-931.262	63.60870402	-561	75.75661905	4	87.02169153	5	90.01558593	10	93.4066386	4	84.66554136	74.42594258	17	106.9689563	-805.818	69.01347299	-433	97.65778733	3	83.61639412	5	90.01558593	11	97.4198399	3	72.32266178	79.77735085	9.122743327	5.404768971	21.90116829	-3.405297409	0	4.013201299	-12.34287958	5.35140827	2	4
380	f	some college	18	y	Y	lumosity	lumosity.y	18	3.639022083	13	94.8395275	-216.89	109.3062128	-449	94.14184935	11	109.6062241	6	102.2366507	4	75.15990345	5	97.01798159	95.54568721	17	106.9689563	-65.63	132.1453918	-398	106.7043604	3	83.61639412	7	114.8036483	11	97.4198399	5	97.01798159	109.5468301	12.12942879	22.83917899	12.56251105	-25.98982994	12.56699756	22.25993644	0	14.00114284	3	2
381	m	some college	50	o	M	crosswords	crosswords.o	40	9.274233056	8	78.75052699	-711.982	74.10119177	-443	95.50283079	6	93.70903787	4	78.64839376	2	66.18670658	3	72.32266178	66.77480396	11	88.54321663	-624.908	79.09061717	-440	96.21518319	7	96.91529003	5	90.01558593	3	70.96685372	4	84.66554136	77.56766783	9.792689645	4.989425404	0.712352404	3.206252155	11.36719217	4.780147138	12.34287958	10.79286386	1	4
382	m	bachelors degree	51	o	M	crosswords	crosswords.o	61	15.55912139	22	121.4547391	-285.672	102.9136352	-384	110.9835584	11	109.6062241	6	102.2366507	9	90.06668352	5	97.01798159	108.3925635	22	121.4547391	-224.829	108.1712241	-430	98.36085186	12	112.8487574	5	90.01558593	13	107.6954863	5	97.01798159	108.7126094	0	5.257588848	-12.62270654	3.242533378	-12.22106476	17.6288028	0	0.320045907	2	4
383	f	advanced degree	44	y	M	crosswords	crosswords.y	67	19.37563139	16	103.9697618	-221.795	108.6465268	-517	82.00724801	12	112.8487574	7	114.8036483	13	107.6954863	6	109.1710722	109.6062241	13	94.8395275	-567.243	82.53178657	-448	94.35441755	10	106.4827223	7	114.8036483	12	102.1387281	6	109.1710722	100.8538075	-9.130234283	-26.11474027	12.34716955	-6.366035154	0	-5.556758251	0	-8.752416547	4	5
384	f	some college	28	y	Y	lumosity	lumosity.y	44	15.55505097	4	63.24467989	-393.459	94.31039417	-628	68.35481696	2	80.40665395	0	61.31611067	4	75.15990345	0	59.35814637	54.03257175	5	67.59046395	-465.891	89.35950383	-480	88.08386544	2	80.40665395	0	61.31611067	7	84.57097827	5	97.01798159	69.50043769	4.345784058	-4.950890345	19.72904848	0	0	9.41107482	37.65983522	15.46786594	3	4
385	f	advanced degree	31	y	Y	lumosity	lumosity.y	45	9.970742917	18	109.8684494	-172.714	113.5568984	-341	124.5226947	17	128.2711147	6	102.2366507	13	107.6954863	6	109.1710722	123.1044163	20	115.7229157	-334.251	99.02299158	-404	105.1012089	8	100.0782549	7	114.8036483	15	120.1949445	5	97.01798159	112.4341684	5.854466341	-14.53390681	-19.42148588	-28.19285985	12.56699756	12.49945815	-12.15309064	-10.67024792	4	4
386	m	advanced degree	68	o	O	lumosity	lumosity.o	7	3.258498611	5	67.59046395	-795.297	69.52982653	-412	103.0124308	5	90.43034386	5	90.01558593	3	70.96685372	3	72.32266178	68.25057042	3	57.8512193	-631.351	78.40965311	-425	99.46328321	3	83.61639412	4	78.64839376	6	81.96893327	5	97.01798159	71.59570603	-9.739244648	8.879826588	-3.549147545	-6.813949733	-11.36719217	11.00207955	24.69531981	3.345135611	4	1
387	f	bachelors degree	28	y	Y	crosswords	crosswords.y	54	15.68145	19	112.8487574	-218.239	109.0009546	-333	127.1431437	3	83.61639412	5	90.01558593	11	97.4198399	5	97.01798159	103.950469	11	88.54321663	-65.63	132.1453918	-366	116.6156143	0	70.89374579	5	90.01558593	13	107.6954863	6	109.1710722	103.5314477	-24.30554081	23.14443726	-10.52752937	-12.72264833	0	10.27564642	12.15309064	-0.419021303	2	3
388	f	bachelors degree	69	o	O	crosswords	crosswords.o	42	10.52184167	13	94.8395275	-832.726	67.89154047	-381	111.8447446	6	93.70903787	5	90.01558593	5	78.88184489	3	72.32266178	78.36757064	14	97.84621295	-638.747	77.95900843	-419	100.9770084	1	77.29023023	5	90.01558593	6	81.96893327	5	97.01798159	81.16827921	3.006685458	10.06746796	-10.86773621	-16.41880764	0	3.087088375	24.69531981	2.800708571	4	1
389	m	bachelors degree	32	y	Y	lumosity	lumosity.y	44	13.02415583	15	100.8687377	-264.024	104.8570837	-610	69.760828	6	93.70903787	6	102.2366507	10	93.4066386	6	109.1710722	93.53772761	14	97.84621295	-363.861	96.57190953	-483	87.46044138	8	100.0782549	9	140.9426022	13	107.6954863	8	133.0119868	115.2905371	-3.022524772	-8.285174135	17.69961337	6.369216984	38.70595156	14.28884771	23.8409146	21.75280952	3	4
390	m	bachelors degree	29	y	Y	lumosity	lumosity.y	25	5.210986111	17	106.9689563	-184.97	112.6083954	-458	92.30876391	12	112.8487574	7	114.8036483	11	97.4198399	4	84.66554136	105.1209545	18	109.8684494	-198.579	110.7413789	-405	104.8688661	9	103.2905327	7	114.8036483	15	120.1949445	6	109.1710722	117.4829046	2.899493105	-1.867016478	12.56010217	-9.558224734	0	22.77510457	24.50553087	12.36195008	4	3
391	m	bachelors degree	34	y	Y	lumosity	lumosity.y	62	16.12909861	21	118.4923683	-249.769	106.3398233	-404	105.1012089	6	93.70903787	6	102.2366507	16	127.595966	8	133.0119868	121.0182319	20	115.7229157	-116.13	121.7917755	-410	103.5889406	11	109.6062241	8	127.5555825	17	137.1423714	6	109.1710722	130.7389955	-2.76945256	15.45195222	-1.512268302	15.89718619	25.31893183	9.546405435	-23.8409146	9.720763666	2	1
392	f	some college	20	y	Y	crosswords	crosswords.y	49	11.53159222	24	127.258891	-66.897	131.4411616	-368	115.9178826	9	103.2905327	6	102.2366507	13	107.6954863	4	84.66554136	117.3585595	20	115.7229157	-223.123	108.2751593	-409	103.8964838	22	143.2148036	7	114.8036483	10	93.4066386	4	84.66554136	115.378512	-11.53597528	-23.16600228	-12.02139878	39.92427086	12.56699756	-14.28884771	0	-1.980047518	5	3
393	m	some college	40	y	M	crosswords	crosswords.y	41	10.467985	14	97.84621295	-334.177	99.1163312	-356	119.4715541	9	103.2905327	5	90.01558593	8	87.11355617	5	97.01798159	98.37959419	14	97.84621295	-477.944	88.66753535	-338	125.4947145	8	100.0782549	6	102.2366507	9	90.06668352	6	109.1710722	103.210419	0	-10.44879585	6.023160361	-3.212277852	12.22106476	2.953127341	12.15309064	4.83082484	1	3
394	m	advanced degree	40	y	M	crosswords	crosswords.y	66	19.58447222	18	109.8684494	-118.693	121.0680766	-567	75.14520953	8	100.0782549	6	102.2366507	14	113.8168191	6	109.1710722	107.5767116	19	112.8487574	-85.302	126.860641	-402	105.565664	10	106.4827223	6	102.2366507	15	120.1949445	6	109.1710722	120.2226491	2.980308053	5.79256437	30.42045451	6.404467432	0	6.378125399	0	12.6459375	4	4
395	f	advanced degree	26	y	Y	crosswords	crosswords.y	54	10.87379861	25	129.8784281	-120.493	120.3248281	-377	113.0162768	20	137.6420803	7	114.8036483	16	127.595966	6	109.1710722	137.4708549	28	139.4590829	-161.339	114.6587923	-390	109.1082611	19	134.6704795	5	90.01558593	12	102.1387281	7	121.0680766	127.3173786	9.580654793	-5.666035753	-3.908015692	-2.971600785	-24.78806232	-25.45723791	11.89700439	-10.15347626	1	4
396	f	NA	38	y	Y	lumosity	lumosity.y	62	10.33716485	15	100.8687377	-420.158	92.41058533	-418	101.2497901	2	80.40665395	5	90.01558593	7	84.57097827	5	97.01798159	86.73210877	9	82.29468311	-271.824	103.9736211	-348	122.2515532	2	80.40665395	5	90.01558593	8	87.11355617	6	109.1710722	93.81061862	-18.57405462	11.5630358	21.0017631	0	0	2.542577902	12.15309064	7.078509849	4	4
397	f	bachelors degree	40	y	M	crosswords	crosswords.y	64	21.87374	20	115.7229157	-631.421	78.35702337	-394	107.9902732	6	93.70903787	6	102.2366507	13	107.6954863	5	97.01798159	100.454691	25	129.8784281	-427.867	92.01831437	-412	103.0124308	12	112.8487574	6	102.2366507	15	120.1949445	5	97.01798159	113.7089616	14.15551238	13.66129099	-4.977842445	19.13971957	0	12.49945815	0	13.25427063	3	4
398	f	some college	48	y	M	lumosity	lumosity.y	51	11.34260528	14	97.84621295	-620.54	79.30507218	-498	84.92095746	7	96.91529003	4	78.64839376	8	87.11355617	4	84.66554136	78.28289108	17	106.9689563	-524.448	85.07457541	-517	82.00724801	2	80.40665395	4	78.64839376	6	81.96893327	5	97.01798159	78.68936565	9.122743327	5.769503225	-2.913709454	-16.50863608	0	-5.144622908	12.35244023	0.406474569	1	4
399	f	some college	58	o	M	lumosity	lumosity.o	42	12.42118681	11	88.54321663	-505.473	86.18887544	-457	92.49939293	10	106.4827223	5	90.01558593	4	75.15990345	3	72.32266178	78.61755998	15	100.8687377	-611.576	79.8326915	-486	86.90753509	9	103.2905327	5	90.01558593	9	90.06668352	3	72.32266178	81.18465789	12.3255211	-6.356183936	-5.591857845	-3.19218958	0	14.90678006	0	2.567097913	3	4
400	f	hs grad or less	66	o	O	lumosity	lumosity.o	49	35.94162444	5	67.59046395	-547.977	83.73765002	-382	111.5668384	0	70.89374579	5	90.01558593	13	107.6954863	4	84.66554136	79.63778114	11	88.54321663	-369.063	96.21903	-496	85.25687548	1	77.29023023	4	78.64839376	10	93.4066386	5	97.01798159	79.72173356	20.95275268	12.48137998	-26.30996288	6.396484438	-11.36719217	-14.28884771	12.35244023	0.083952418	2	3
401	f	bachelors degree	32	y	Y	crosswords	crosswords.y	50	14.47759389	14	97.84621295	-335.872	98.98191037	-323	130.5586937	14	119.1220614	7	114.8036483	14	113.8168191	7	121.0680766	123.2767812	16	103.9697618	-352.224	97.77088515	-349	121.8885759	14	119.1220614	7	114.8036483	10	93.4066386	6	109.1710722	114.4618189	6.123548824	-1.211025217	-8.670117751	0	0	-20.41018047	-11.89700439	-8.814962232	4	4
402	m	advanced degree	70	o	O	lumosity	lumosity.o	33	7.438688333	12	91.65967918	-878.09	65.32952047	-341	124.5226947	10	106.4827223	5	90.01558593	11	97.4198399	6	109.1710722	96.09580715	12	91.65967918	-505.473	86.18887544	-360	118.4923683	4	87.02169153	7	114.8036483	11	97.4198399	4	84.66554136	95.08790593	0	20.85935497	-6.03032646	-19.46103075	24.78806232	0	-24.50553087	-1.007901218	3	4
403	f	bachelors degree	45	y	M	crosswords	crosswords.y	54	12.47680111	12	91.65967918	-584.205	81.49168624	-330	128.4943399	10	106.4827223	8	127.5555825	12	102.1387281	5	97.01798159	108.5236189	18	109.8684494	-323.534	99.9962736	-476	88.83045447	3	83.61639412	6	102.2366507	6	81.96893327	5	97.01798159	90.94097858	18.2087702	18.50458735	-39.66388545	-22.86632816	-25.31893183	-20.16979479	0	-17.5826403	2	3
404	f	bachelors degree	58	o	M	lumosity	lumosity.o	57	35.16617236	4	63.24467989	-377.966	95.59628891	-673	64.99792093	3	83.61639412	5	90.01558593	4	75.15990345	4	84.66554136	66.50975838	6	71.50566007	-290.774	102.6369078	-457	92.49939293	4	87.02169153	6	102.2366507	6	81.96893327	4	84.66554136	80.96995768	8.260980183	7.040618925	27.501472	3.405297409	12.22106476	6.809029814	0	14.4601993	2	2
405	m	some college	66	o	O	crosswords	crosswords.o	39	10.45226083	9	82.29468311	-611.576	79.8326915	-446	94.76830456	3	83.61639412	5	90.01558593	7	84.57097827	5	97.01798159	78.76068626	9	82.29468311	-625.104	79.07090832	-475	88.98718796	5	90.43034386	5	90.01558593	7	84.57097827	3	72.32266178	73.43055144	0	-0.761783176	-5.781116597	6.813949733	0	0	-24.69531981	-5.330134818	1	5
406	m	hs grad or less	26	y	Y	crosswords	crosswords.y	56	10.43756222	14	97.84621295	-184.97	112.6083954	-320	131.4077174	5	90.43034386	7	114.8036483	16	127.595966	5	97.01798159	117.1133837	12	91.65967918	-121.573	119.930612	-349	121.8885759	3	83.61639412	6	102.2366507	17	137.1423714	4	84.66554136	110.05428	-6.18653377	7.322216676	-9.519141469	-6.813949733	-12.56699756	9.546405435	-12.35244023	-7.059103714	1	1
407	f	bachelors degree	33	y	Y	crosswords	crosswords.y	52	13.35370778	21	118.4923683	-217.51	109.1665804	-428	98.81002988	3	83.61639412	6	102.2366507	13	107.6954863	6	109.1710722	107.0146506	21	118.4923683	-154.501	116.3565677	-442	95.75943256	8	100.0782549	6	102.2366507	14	113.8168191	5	97.01798159	110.6404962	0	7.189987326	-3.05059732	16.46186073	0	6.121332753	-12.15309064	3.625845591	2	4
408	f	some college	44	y	M	crosswords	crosswords.y	42	15.38739472	14	97.84621295	-563.027	82.79341523	-518	81.86102104	8	100.0782549	5	90.01558593	12	102.1387281	4	84.66554136	84.97644144	11	88.54321663	-357.241	97.17365544	-476	88.83045447	7	96.91529003	4	78.64839376	11	97.4198399	5	97.01798159	86.24571139	-9.302996324	14.38024021	6.969433429	-3.162964829	-11.36719217	-4.718888164	12.35244023	1.269269945	2	4
409	m	bachelors degree	24	y	Y	crosswords	crosswords.y	50	14.05239306	21	118.4923683	-321.254	100.1527852	-471	89.77714362	12	112.8487574	7	114.8036483	7	84.57097827	6	109.1710722	107.2231827	17	106.9689563	-271.844	103.8502509	-455	92.86039548	14	119.1220614	6	102.2366507	13	107.6954863	6	109.1710722	110.2040622	-11.52341201	3.697465683	3.08325186	6.273303911	-12.56699756	23.12450804	0	2.980879465	1	4
410	f	advanced degree	36	y	Y	lumosity	lumosity.y	34	18.00657889	20	115.7229157	-146.632	117.2932101	-358	118.9387339	9	103.2905327	5	90.01558593	14	113.8168191	4	84.66554136	110.6357043	21	118.4923683	-352.808	97.65024282	-395	107.6275565	7	96.91529003	5	90.01558593	4	75.15990345	4	84.66554136	92.63841989	2.76945256	-19.64296729	-11.31117745	-6.375242681	0	-38.65691561	0	-17.99728436	4	4
411	m	bachelors degree	31	y	Y	crosswords	crosswords.y	22	6.132878056	21	118.4923683	-142.668	117.9393078	-413	102.7126304	11	109.6062241	6	102.2366507	4	75.15990345	5	97.01798159	105.581635	25	129.8784281	-310.226	100.9695399	-349	121.8885759	9	103.2905327	5	90.01558593	4	75.15990345	5	97.01798159	104.2095498	11.38605982	-16.96976785	19.17594556	-6.315691356	-12.22106476	0	0	-1.372085182	2	2
412	m	some college	19	y	Y	lumosity	lumosity.y	19	4.799500972	20	115.7229157	-219.623	108.7832845	-330	128.4943399	10	106.4827223	6	102.2366507	8	87.11355617	7	121.0680766	116.8446651	22	121.4547391	-189.432	111.8294817	-314	133.7661754	17	128.2711147	8	127.5555825	7	84.57097827	6	109.1710722	128.5397507	5.731823328	3.046197217	5.271835457	21.78839242	25.31893183	-2.542577902	-11.89700439	11.69508563	5	2
413	f	hs grad or less	36	y	Y	lumosity	lumosity.y	68	22.77215139	14	97.84621295	-232.7	106.8736216	-454	93.12637837	6	93.70903787	5	90.01558593	10	93.4066386	5	97.01798159	93.02689237	14	97.84621295	-121.573	119.930612	-498	84.92095746	10	106.4827223	5	90.01558593	15	120.1949445	6	109.1710722	106.9108932	0	13.05699041	-8.205420902	12.77368442	0	26.78830587	12.15309064	13.88400086	1	2
414	m	advanced degree	47	y	M	crosswords	crosswords.y	65	23.98139972	16	103.9697618	-415.692	92.91460252	-530	79.8326915	10	106.4827223	5	90.01558593	12	102.1387281	5	97.01798159	93.16774154	15	100.8687377	-457.442	89.57882363	-496	85.25687548	11	109.6062241	6	102.2366507	13	107.6954863	6	109.1710722	100.8612725	-3.101024052	-3.335778888	5.42418398	3.123501776	12.22106476	5.556758251	12.15309064	7.693530974	2	2
415	f	advanced degree	29	y	Y	crosswords	crosswords.y	61	17.09550778	11	88.54321663	-383.797	95.23706856	-442	95.75943256	12	112.8487574	7	114.8036483	13	107.6954863	4	84.66554136	99.72423051	13	94.8395275	-271.795	104.0431346	-431	98.13198035	16	125.4160785	5	90.01558593	9	90.06668352	6	109.1710722	102.746728	6.296310865	8.806066079	2.372547782	12.5673211	-24.78806232	-17.6288028	24.50553087	3.022497453	2	3
416	f	advanced degree	39	y	Y	lumosity	lumosity.y	21	4.439391426	18	109.8684494	-142.668	117.9393078	-353	120.446814	17	128.2711147	7	114.8036483	5	78.88184489	7	121.0680766	122.1070148	21	118.4923683	-216.89	109.3062128	-346	122.8514513	18	131.5085227	7	114.8036483	10	93.4066386	8	133.0119868	130.3827019	8.6239189	-8.633094934	2.404637287	3.237407947	0	14.52479371	11.94391021	8.275687109	3	1
417	f	bachelors degree	71	o	O	lumosity	lumosity.o	66	42.20449778	10	85.57372703	-632.24	78.18679174	-527	80.31004621	4	87.02169153	5	90.01558593	10	93.4066386	3	72.32266178	73.19473087	15	100.8687377	-282.364	103.172302	-612	69.61729813	3	83.61639412	6	102.2366507	12	102.1387281	5	97.01798159	89.84285346	15.2950107	24.98551023	-10.69274808	-3.405297409	12.22106476	8.732089463	24.69531981	16.64812259	2	3
418	m	advanced degree	23	y	Y	lumosity	lumosity.y	48	26.15775736	13	94.8395275	-164.087	114.426273	-369	115.5624496	9	103.2905327	6	102.2366507	13	107.6954863	6	109.1710722	111.3473417	22	121.4547391	-91.81	125.526366	-381	111.8447446	14	119.1220614	6	102.2366507	11	97.4198399	6	109.1710722	121.0880798	26.61521156	11.10009302	-3.717705	15.83152864	0	-10.27564642	0	9.740738128	3	4
419	m	bachelors degree	25	y	Y	crosswords	crosswords.y	53	15.596655	21	118.4923683	-91.81	125.526366	-351	121.0980955	14	119.1220614	6	102.2366507	15	120.1949445	7	121.0680766	131.6797621	22	121.4547391	-186.398	112.2616031	-296	141.2607694	16	125.4160785	8	127.5555825	15	120.1949445	6	109.1710722	138.6838893	2.962370769	-13.26476293	20.16267396	6.294017188	25.31893183	0	-11.89700439	7.004127239	3	3
420	f	bachelors degree	22	y	Y	crosswords	crosswords.y	43	8.45785	20	115.7229157	-302.907	101.7141433	-411	103.29435	7	96.91529003	6	102.2366507	15	120.1949445	5	97.01798159	109.1441336	23	124.4099523	-340.338	98.77638352	-392	108.5586767	10	106.4827223	7	114.8036483	14	113.8168191	6	109.1710722	118.3497896	8.687036577	-2.937759821	5.264326754	9.567432261	12.56699756	-6.378125399	12.15309064	9.205656032	4	3
421	f	bachelors degree	70	o	O	crosswords	crosswords.o	67	18.298475	15	100.8687377	-504.045	86.38131889	-423	99.9031128	9	103.2905327	4	78.64839376	4	75.15990345	4	84.66554136	82.61229025	14	97.84621295	-677.407	76.04112448	-434	97.43874756	8	100.0782549	4	78.64839376	3	70.96685372	3	72.32266178	74.81573132	-3.022524772	-10.3401944	-2.464365239	-3.212277852	0	-4.193049736	-12.34287958	-7.796558922	2	4
422	f	some college	57	o	M	lumosity	lumosity.o	51	11.22810569	16	103.9697618	-592.541	80.96995768	-454	93.12637837	6	93.70903787	5	90.01558593	11	97.4198399	5	97.01798159	89.13304123	13	94.8395275	-352.224	97.77088515	-451	93.74563994	0	70.89374579	5	90.01558593	11	97.4198399	5	97.01798159	85.51443857	-9.130234283	16.80092747	0.619261578	-22.81529208	0	0	0	-3.618602665	1	1
423	f	bachelors degree	53	o	M	lumosity	lumosity.o	52	11.53532667	15	100.8687377	-445.189	90.57605158	-419	100.9770084	10	106.4827223	6	102.2366507	14	113.8168191	4	84.66554136	99.75404626	16	103.9697618	-369.022	96.31127953	-567	75.14520953	10	106.4827223	4	78.64839376	10	93.4066386	5	97.01798159	87.77479324	3.101024052	5.735227946	-25.83179889	0	-23.58825693	-20.41018047	12.35244023	-11.97925302	4	4
425	f	hs grad or less	23	y	Y	lumosity	lumosity.y	14	2.982407778	19	112.8487574	-606.051	80.25700505	-410	103.5889406	7	96.91529003	6	102.2366507	7	84.57097827	5	97.01798159	94.466259	13	94.8395275	-307.241	101.2049233	-462	91.5288808	9	103.2905327	7	114.8036483	9	90.06668352	3	72.32266178	91.96674959	-18.00922994	20.94791826	-12.06005977	6.375242681	12.56699756	5.495705243	-24.69531981	-2.499509412	4	3
426	m	bachelors degree	48	y	M	lumosity	lumosity.y	42	33.85061347	16	103.9697618	-402.742	93.77814388	-483	87.46044138	8	100.0782549	5	90.01558593	13	107.6954863	5	97.01798159	95.013143	25	129.8784281	-447.082	90.26073496	-434	97.43874756	10	106.4827223	5	90.01558593	15	120.1949445	5	97.01798159	107.555552	25.90866632	-3.517408917	9.978306188	6.404467432	0	12.49945815	0	12.542409	4	4
427	m	advanced degree	24	y	Y	lumosity	lumosity.y	19	6.964290399	20	115.7229157	-61.281	132.9285386	-424	99.68323205	12	112.8487574	7	114.8036483	10	93.4066386	6	109.1710722	119.0050702	22	121.4547391	-375.646	95.64295372	-450	93.96044048	2	80.40665395	5	90.01558593	11	97.4198399	6	109.1710722	96.91909597	5.731823328	-37.28558487	-5.722791575	-32.44210349	-24.78806232	4.013201299	0	-22.08597419	3	4
429	m	advanced degree	19	y	Y	crosswords	crosswords.y	4	0.910901945	19	112.8487574	-234.552	106.828125	-381	111.8447446	5	90.43034386	6	102.2366507	6	81.96893327	6	109.1710722	103.5889406	17	106.9689563	-415.692	92.91460252	-314	133.7661754	14	119.1220614	6	102.2366507	9	90.06668352	4	84.66554136	107.1688315	-5.879801159	-13.91352248	21.92143075	28.69171749	0	8.097750249	-24.50553087	3.579890973	NA	NA
430	f	bachelors degree	19	y	Y	crosswords	crosswords.y	1	0.890038333	13	94.8395275	-232.182	106.9689563	-411	103.29435	0	70.89374579	5	90.01558593	10	93.4066386	5	97.01798159	89.23935028	15	100.8687377	-261.277	105.2079414	-419	100.9770084	6	93.70903787	7	114.8036483	13	107.6954863	5	97.01798159	104.7629314	6.02921023	-1.76101485	-2.317341544	22.81529208	24.78806232	14.28884771	0	15.52358116	2	2
431	f	hs grad or less	60	o	M	lumosity	lumosity.o	30	5.554768056	7	75.29108861	-391.284	94.64933613	-526	80.51978898	1	77.29023023	6	102.2366507	13	107.6954863	5	97.01798159	84.06247258	8	78.75052699	-759.351	71.75086648	-643	67.23536382	0	70.89374579	5	90.01558593	5	78.88184489	3	72.32266178	61.31611067	3.459438376	-22.89846964	-13.28442516	-6.396484438	-12.22106476	-28.81364142	-24.69531981	-22.74636191	1	4
432	m	bachelors degree	25	y	Y	crosswords	crosswords.y	51	9.737631666	16	103.9697618	-387.362	94.90668691	-340	124.913806	15	122.4665932	8	127.5555825	15	120.1949445	6	109.1710722	125.3226281	12	91.65967918	-155.402	115.9571997	-378	112.741526	12	112.8487574	7	114.8036483	12	102.1387281	8	133.0119868	120.1489225	-12.31008259	21.05051274	-12.17227994	-9.617835738	-12.75193428	-18.0562164	23.8409146	-5.173705574	2	4
433	f	some college	54	o	M	lumosity	lumosity.o	43	8.716055	4	63.24467989	-232.182	106.9689563	-452	93.53363859	12	112.8487574	5	90.01558593	16	127.595966	5	97.01798159	97.6728746	17	106.9689563	-493.725	87.48156883	-337	125.7674562	12	112.8487574	6	102.2366507	7	84.57097827	6	109.1710722	106.9772595	43.72427639	-19.48738746	32.23381764	0	12.22106476	-43.0249877	12.15309064	9.304384917	1	2
434	m	hs grad or less	61	o	M	lumosity	lumosity.o	69	13.40875056	18	109.8684494	-370.77	96.09195223	-553	76.77277934	8	100.0782549	7	114.8036483	12	102.1387281	7	121.0680766	104.8688661	21	118.4923683	-218.239	109.0009546	-367	116.2690585	11	109.6062241	4	78.64839376	11	97.4198399	6	109.1710722	109.5377058	8.6239189	12.90900232	39.49627919	9.527969208	-36.15525449	-4.718888164	-11.89700439	4.66883972	1	4
435	f	advanced degree	35	y	Y	crosswords	crosswords.y	70	17.3800825	18	109.8684494	-270.266	104.3415007	-531	79.72173356	5	90.43034386	6	102.2366507	14	113.8168191	5	97.01798159	99.26187407	20	115.7229157	-262.847	105.0814721	-428	98.81002988	8	100.0782549	7	114.8036483	4	75.15990345	6	109.1710722	104.3725965	5.854466341	0.739971319	19.08829632	9.647910998	12.56699756	-38.65691561	12.15309064	5.110722438	4	3
436	m	some college	31	y	Y	crosswords	crosswords.y	3	0.942772778	15	100.8687377	-320.396	100.3987723	-414	102.4290109	8	100.0782549	6	102.2366507	8	87.11355617	5	97.01798159	97.39336227	21	118.4923683	-545.514	83.87114436	-449	94.14184935	11	109.6062241	5	90.01558593	5	78.88184489	4	84.66554136	90.02023595	17.62363056	-16.52762792	-8.287161561	9.527969208	-12.22106476	-8.231711283	-12.35244023	-7.373126318	1	3
437	m	bachelors degree	25	y	Y	lumosity	lumosity.y	30	3.642059028	14	97.84621295	-224.829	108.1712241	-381	111.8447446	0	70.89374579	7	114.8036483	12	102.1387281	5	97.01798159	100.4397788	18	109.8684494	-252.907	105.9185238	-402	105.565664	4	87.02169153	6	102.2366507	12	102.1387281	7	121.0680766	108.2491384	12.02223643	-2.252700267	-6.279080585	16.12794574	-12.56699756	0	24.05009504	7.809359653	2	NA
438	f	NA	55	o	M	crosswords	crosswords.o	45	8.222378889	7	75.29108861	-795.297	69.52982653	-474	89.17176197	4	87.02169153	0	61.31611067	7	84.57097827	3	72.32266178	63.7485059	7	75.29108861	-264.024	104.8570837	-420	100.6933581	3	83.61639412	5	90.01558593	6	81.96893327	4	84.66554136	80.66608313	0	35.32725714	11.52159615	-3.405297409	28.69947526	-2.602045007	12.34287958	16.91757723	1	3
439	m	bachelors degree	31	y	Y	lumosity	lumosity.y	53	10.83372757	13	94.8395275	-327.397	99.61613842	-441	95.98777089	9	103.2905327	7	114.8036483	13	107.6954863	6	109.1710722	106.1690994	14	97.84621295	-264.024	104.8570837	-419	100.9770084	14	119.1220614	6	102.2366507	15	120.1949445	6	109.1710722	112.9458302	3.006685458	5.240945255	4.989237536	15.83152864	-12.56699756	12.49945815	0	6.776730825	4	4
440	f	some college	28	y	Y	lumosity	lumosity.y	56	14.01534778	23	124.4099523	-249.769	106.3398233	-381	111.8447446	17	128.2711147	5	90.01558593	14	113.8168191	6	109.1710722	120.3061799	25	129.8784281	-161.009	114.9928228	-372	114.5570077	15	122.4665932	5	90.01558593	15	120.1949445	8	133.0119868	130.8617108	5.468475799	8.652999488	2.712263058	-5.80452153	0	6.378125399	23.8409146	10.55553085	2	2
441	f	advanced degree	55	o	M	lumosity	lumosity.o	56	13.31722417	15	100.8687377	-391.284	94.64933613	-657	66.23382462	12	112.8487574	3	69.29136417	9	90.06668352	5	97.01798159	83.19727214	11	88.54321663	-547.385	83.79788129	-460	91.91078039	17	128.2711147	5	90.01558593	12	102.1387281	7	121.0680766	101.1974466	-12.3255211	-10.85145484	25.67695578	15.42235727	20.72422176	12.07204455	24.05009504	18.00017442	5	5
442	m	bachelors degree	25	y	Y	lumosity	lumosity.y	50	12.18359194	12	91.65967918	-530.104	84.79691492	-396	107.3069857	0	70.89374579	6	102.2366507	15	120.1949445	5	97.01798159	93.56225165	11	88.54321663	-445.189	90.57605158	-437	96.84674887	10	106.4827223	6	102.2366507	13	107.6954863	6	109.1710722	100.1676917	-3.116462554	5.77913666	-10.46023687	35.58897649	0	-12.49945815	12.15309064	6.605440059	4	5
443	f	bachelors degree	53	o	M	lumosity	lumosity.o	36	6.575194444	13	94.8395275	-285.672	102.9136352	-400	106.1123696	3	83.61639412	5	90.01558593	12	102.1387281	4	84.66554136	91.13253476	13	94.8395275	-534.493	84.48216277	-334	126.7685565	3	83.61639412	7	114.8036483	15	120.1949445	5	97.01798159	105.1407091	0	-18.43147246	20.65618685	0	24.78806232	18.0562164	12.35244023	14.00817429	3	4
446	f	bachelors degree	57	o	M	crosswords	crosswords.o	69	26.46581278	15	100.8687377	-387.938	94.78810047	-477	88.67744719	3	83.61639412	4	78.64839376	10	93.4066386	5	97.01798159	84.53932067	18	109.8684494	-448.592	90.04811594	-501	84.4055999	8	100.0782549	5	90.01558593	8	87.11355617	5	97.01798159	89.81471604	8.99971166	-4.739984534	-4.271847296	16.46186073	11.36719217	-6.293082423	0	5.275395367	4	4
447	f	advanced degree	23	y	Y	crosswords	crosswords.y	31	9.409953055	14	97.84621295	-184.226	112.7789827	-438	96.65600612	9	103.2905327	7	114.8036483	14	113.8168191	6	109.1710722	111.5768742	22	121.4547391	-92.704	124.8254264	-413	102.7126304	17	128.2711147	8	127.5555825	11	97.4198399	6	109.1710722	127.4356158	23.6085261	12.04644371	6.05662425	24.980582	12.75193428	-16.39697917	0	15.85874154	3	4
448	f	advanced degree	56	o	M	crosswords	crosswords.o	58	14.50850667	12	91.65967918	-503.015	86.68244243	-503	84.04936081	10	106.4827223	6	102.2366507	9	90.06668352	5	97.01798159	89.74421507	14	97.84621295	-260.226	105.4580238	-422	100.1304258	9	103.2905327	6	102.2366507	11	97.4198399	6	109.1710722	103.6464862	6.18653377	18.77558136	16.081065	-3.19218958	0	7.353156381	12.15309064	13.90227116	4	4
449	m	bachelors degree	49	y	M	lumosity	lumosity.y	41	10.37573958	17	106.9689563	-260.226	105.4580238	-378	112.741526	8	100.0782549	6	102.2366507	13	107.6954863	4	84.66554136	104.6650553	17	106.9689563	-579.81	82.02254108	-407	104.3725965	12	112.8487574	5	90.01558593	13	107.6954863	4	84.66554136	97.01037966	0	-23.43548271	-8.368929509	12.77050259	-12.22106476	0	0	-7.654675629	4	3
450	f	bachelors degree	40	y	M	lumosity	lumosity.y	66	31.34816722	11	88.54321663	-227.897	107.3910175	-410	103.5889406	0	70.89374579	5	90.01558593	7	84.57097827	5	97.01798159	85.6150952	10	85.57372703	-753.127	72.17826899	-411	103.29435	6	93.70903787	4	78.64839376	10	93.4066386	4	84.66554136	78.62784794	-2.969489603	-35.21274849	-0.2945906	22.81529208	-11.36719217	8.835660325	-12.35244023	-6.987247261	3	4
451	f	some college	47	y	M	lumosity	lumosity.y	59	15.36347583	23	124.4099523	-219.623	108.7832845	-453	93.3614607	13	116.0032086	5	90.01558593	10	93.4066386	4	84.66554136	102.4932183	25	129.8784281	-606.051	80.25700505	-451	93.74563994	17	128.2711147	6	102.2366507	13	107.6954863	4	84.66554136	106.5482432	5.468475799	-28.52627942	0.384179241	12.2679061	12.22106476	14.28884771	0	4.055024943	4	4
453	f	hs grad or less	18	y	Y	crosswords	crosswords.y	12	1.599357222	17	106.9689563	-92.704	124.8254264	-472	89.57882363	3	83.61639412	8	127.5555825	6	81.96893327	6	109.1710722	105.7176462	19	112.8487574	-85.28	127.8634635	-438	96.65600612	7	96.91529003	6	102.2366507	7	84.57097827	6	109.1710722	107.3279721	5.879801159	3.038037065	7.077182491	13.2988959	-25.31893183	2.602045007	0	1.610325864	3	4
454	f	bachelors degree	29	y	Y	crosswords	crosswords.y	48	12.18745972	12	91.65967918	-61.281	132.9285386	-569	74.80046366	8	100.0782549	7	114.8036483	11	97.4198399	3	72.32266178	96.01093885	11	88.54321663	-271.844	103.8502509	-426	99.23202524	16	125.4160785	7	114.8036483	9	90.06668352	6	109.1710722	107.4879418	-3.116462554	-29.07828767	24.43156158	25.33782368	0	-7.353156381	36.84841046	11.47700292	4	5
455	f	advanced degree	27	y	Y	crosswords	crosswords.y	31	7.032623056	15	100.8687377	-116.13	121.7917755	-510	82.87947047	10	106.4827223	5	90.01558593	11	97.4198399	6	109.1710722	101.8905542	14	97.84621295	-154.501	116.3565677	-482	87.6810564	11	109.6062241	6	102.2366507	12	102.1387281	6	109.1710722	106.0355187	-3.022524772	-5.435207759	4.801585927	3.123501776	12.22106476	4.718888164	0	4.144964452	4	4
456	f	some college	59	o	M	crosswords	crosswords.o	25	6.500259167	11	88.54321663	-629.932	78.493312	-499	84.72198782	3	83.61639412	5	90.01558593	6	81.96893327	5	97.01798159	77.16043351	13	94.8395275	-282.364	103.172302	-470	89.9830089	9	103.2905327	5	90.01558593	14	113.8168191	4	84.66554136	94.9855676	6.296310865	24.67898997	5.261021078	19.67413858	0	31.8478858	-12.35244023	17.82513409	1	2
457	f	advanced degree	30	y	Y	crosswords	crosswords.y	56	15.25331028	19	112.8487574	-164.087	114.426273	-412	103.0124308	5	90.43034386	7	114.8036483	11	97.4198399	7	121.0680766	112.875668	21	118.4923683	-271.844	103.8502509	-446	94.76830456	9	103.2905327	7	114.8036483	12	102.1387281	6	109.1710722	111.1843017	5.643610847	-10.57602205	-8.244126195	12.86018885	0	4.718888164	-11.89700439	-1.691366253	4	4
458	f	hs grad or less	40	y	M	crosswords	crosswords.y	58	13.0977375	24	127.258891	-495.998	87.3278265	-462	91.5288808	5	90.43034386	7	114.8036483	5	78.88184489	6	109.1710722	99.70932224	21	118.4923683	-296.854	102.11238	-382	111.5668384	7	96.91529003	5	90.01558593	14	113.8168191	5	97.01798159	107.2692463	-8.766522723	14.78455352	20.03795756	6.484946169	-24.78806232	34.93497417	-12.15309064	7.559924066	3	2
459	m	bachelors degree	51	o	M	crosswords	crosswords.o	65	29.98658889	7	75.29108861	-408.93	93.36557027	-451	93.74563994	0	70.89374579	5	90.01558593	12	102.1387281	3	72.32266178	75.89317972	10	85.57372703	-459.105	89.50279329	-410	103.5889406	3	83.61639412	6	102.2366507	11	97.4198399	5	97.01798159	89.88966993	10.28263842	-3.862776975	9.843300625	12.72264833	12.22106476	-4.718888164	24.69531981	13.99649021	2	3
460	f	some college	44	y	M	crosswords	crosswords.y	69	21.47830806	12	91.65967918	-413.265	93.15120252	-369	115.5624496	9	103.2905327	5	90.01558593	10	93.4066386	5	97.01798159	96.04181469	16	103.9697618	-280.738	103.3554553	-398	106.7043604	13	116.0032086	5	90.01558593	12	102.1387281	4	84.66554136	101.4518351	12.31008259	10.20425283	-8.858089232	12.7126759	0	8.732089463	-12.35244023	5.410020413	4	4
461	f	advanced degree	61	o	M	lumosity	lumosity.o	14	3.220155139	16	103.9697618	-419.318	92.50361529	-457	92.49939293	6	93.70903787	6	102.2366507	13	107.6954863	5	97.01798159	97.29494496	15	100.8687377	-475.341	88.82553694	-409	103.8964838	5	90.43034386	5	90.01558593	12	102.1387281	6	109.1710722	96.29207249	-3.101024052	-3.678078355	11.39709085	-3.278694015	-12.22106476	-5.556758251	12.15309064	-1.002872467	3	1
462	m	advanced degree	28	y	Y	lumosity	lumosity.y	57	11.58144403	16	103.9697618	-346.854	98.34210698	-431	98.13198035	14	119.1220614	4	78.64839376	14	113.8168191	6	109.1710722	104.994734	22	121.4547391	-120.462	120.6949278	-347	122.5816515	14	119.1220614	7	114.8036483	17	137.1423714	6	109.1710722	135.7855226	17.48497728	22.35282084	24.44967119	0	36.15525449	23.32555234	0	30.79078861	5	3
463	f	hs grad or less	25	y	Y	crosswords	crosswords.y	25	7.9524025	6	71.50566007	-306.514	101.3844593	-405	104.8688661	4	87.02169153	6	102.2366507	7	84.57097827	5	97.01798159	87.17811182	7	75.29108861	-636.913	77.98092154	-445	95.02101858	4	87.02169153	6	102.2366507	13	107.6954863	5	97.01798159	85.66812264	3.785428537	-23.40353777	-9.847847505	0	0	23.12450804	0	-1.509989187	1	4
464	m	hs grad or less	20	y	Y	lumosity	lumosity.y	54	11.94697278	34	150.3291094	-120.462	120.6949278	-393	108.3012051	9	103.2905327	7	114.8036483	16	127.595966	6	109.1710722	132.6442277	30	144.5573655	-271.824	103.9736211	-359	118.7337831	19	134.6704795	6	102.2366507	12	102.1387281	5	97.01798159	125.4317499	-5.771743885	-16.72130669	10.43257803	31.37994682	-12.56699756	-25.45723791	-12.15309064	-7.212477785	1	2
465	f	some college	21	y	Y	crosswords	crosswords.y	13	2.5095425	24	127.258891	-383.797	95.23706856	-388	109.6336875	7	96.91529003	6	102.2366507	12	102.1387281	5	97.01798159	107.3910175	31	146.860396	-524.448	85.07457541	-388	109.6336875	0	70.89374579	6	102.2366507	13	107.6954863	6	109.1710722	107.6657477	19.60150499	-10.16249315	0	-26.02154423	0	5.556758251	12.15309064	0.274730194	3	3
466	m	bachelors degree	23	y	Y	lumosity	lumosity.y	26	6.189393056	8	78.75052699	-285.672	102.9136352	-380	112.1319449	4	87.02169153	5	90.01558593	13	107.6954863	3	72.32266178	87.73839693	8	78.75052699	-261.247	105.3347821	-433	97.65778733	5	90.43034386	7	114.8036483	10	93.4066386	6	109.1710722	97.26842826	0	2.42114689	-14.47415757	3.408652324	24.78806232	-14.28884771	36.84841046	9.530031327	2	4
467	m	some college	24	y	Y	lumosity	lumosity.y	36	9.582133611	14	97.84621295	-303.001	101.5154947	-412	103.0124308	19	134.6704795	6	102.2366507	10	93.4066386	6	109.1710722	110.1805919	15	100.8687377	-353.143	97.57853995	-446	94.76830456	10	106.4827223	6	102.2366507	7	84.57097827	6	109.1710722	98.78012231	3.022524772	-3.936954723	-8.244126195	-28.18775724	0	-8.835660325	0	-11.4004696	4	4
468	m	NA	57	o	M	lumosity	lumosity.o	38	17.17301292	5	67.59046395	-581.489	81.89966869	-532	79.58145657	5	90.43034386	6	102.2366507	11	97.4198399	5	97.01798159	79.65649234	5	67.59046395	-533.173	84.62148798	-505	83.69062158	7	96.91529003	3	69.29136417	8	87.11355617	0	59.35814637	65.48916582	0	2.721819286	4.109165013	6.484946169	-32.94528652	-10.30628372	-37.65983522	-14.16732652	4	4
469	f	some college	45	y	M	crosswords	crosswords.y	2	0.808414167	14	97.84621295	-387.938	94.78810047	-399	106.4132415	7	96.91529003	7	114.8036483	14	113.8168191	5	97.01798159	105.1130552	19	112.8487574	-493.569	87.53427915	-372	114.5570077	7	96.91529003	4	78.64839376	14	113.8168191	5	97.01798159	100.1304258	15.00254449	-7.253821327	8.143766179	0	-36.15525449	0	0	-4.982629389	1	1
470	m	advanced degree	24	y	Y	lumosity	lumosity.y	59	11.60827597	15	100.8687377	-120.493	120.3248281	-376	113.3618283	7	96.91529003	6	102.2366507	12	102.1387281	7	121.0680766	113.6018084	16	103.9697618	-402.418	93.91596242	-424	99.68323205	9	103.2905327	6	102.2366507	16	127.595966	8	133.0119868	115.3281761	3.101024052	-26.40886564	-13.67859627	6.375242681	0	25.45723791	11.94391021	1.726367697	4	4
471	f	hs grad or less	56	o	M	crosswords	crosswords.o	69	17.33667778	19	112.8487574	-274.828	103.7079275	-533	79.43937075	13	116.0032086	5	90.01558593	9	90.06668352	5	97.01798159	97.09016205	15	100.8687377	-509.644	85.93640305	-368	115.9178826	5	90.43034386	6	102.2366507	8	87.11355617	6	109.1710722	97.80478951	-11.98001971	-17.77152445	36.4785118	-25.57286475	12.22106476	-2.953127341	12.15309064	0.714627457	5	4
472	f	bachelors degree	65	o	O	lumosity	lumosity.o	45	10.42175025	26	132.9285386	-290.774	102.6369078	-439	96.43789596	12	112.8487574	6	102.2366507	11	97.4198399	4	84.66554136	107.0063377	23	124.4099523	-413.529	93.07667344	-425	99.46328321	11	109.6062241	4	78.64839376	12	102.1387281	7	121.0680766	106.8943228	-8.518586283	-9.5602344	3.025387252	-3.242533378	-23.58825693	4.718888164	36.40253527	-0.112014876	5	4
473	m	bachelors degree	26	y	Y	crosswords	crosswords.y	65	21.38171	19	112.8487574	-212.542	109.469386	-399	106.4132415	8	100.0782549	7	114.8036483	13	107.6954863	7	121.0680766	117.3294747	19	112.8487574	-123.177	119.5322891	-373	114.2907573	7	96.91529003	5	90.01558593	15	120.1949445	7	121.0680766	118.1467229	0	10.06290314	7.877515804	-3.162964829	-24.78806232	12.49945815	0	0.817248212	1	3
474	f	some college	73	o	O	crosswords	crosswords.o	63	25.20984028	9	82.29468311	-417.256	92.78936827	-667	65.48916582	1	77.29023023	4	78.64839376	8	87.11355617	3	72.32266178	66.32707324	9	82.29468311	-482.726	88.35776591	-677	64.40404693	0	70.89374579	0	61.31611067	6	81.96893327	0	59.35814637	56.28946184	0	-4.431602357	-1.085118891	-6.396484438	-17.33228309	-5.144622908	-12.96451541	-10.0376114	3	3
475	m	bachelors degree	30	y	Y	lumosity	lumosity.y	59	17.27390617	21	118.4923683	-116.13	121.7917755	-360	118.4923683	7	96.91529003	6	102.2366507	9	90.06668352	5	97.01798159	110.8766503	26	132.9285386	-101.001	123.7738898	-389	109.3559537	4	87.02169153	6	102.2366507	14	113.8168191	4	84.66554136	112.7843402	14.4361703	1.9821143	-9.136414624	-9.893598494	0	23.75013555	-12.35244023	1.907689908	4	4
476	f	advanced degree	66	o	O	lumosity	lumosity.o	65	24.95100889	17	106.9689563	-157.142	115.5944001	-549	77.26675724	11	109.6062241	5	90.01558593	13	107.6954863	5	97.01798159	100.7978266	17	106.9689563	-155.402	115.9571997	-551	77.0409341	10	106.4827223	6	102.2366507	16	127.595966	4	84.66554136	104.9042314	0	0.362799549	-0.225823139	-3.123501776	12.22106476	19.90047966	-12.35244023	4.106404772	2	5
477	f	bachelors degree	36	y	Y	crosswords	crosswords.y	1	0.623331389	7	75.29108861	-398.85	93.98871705	-585	72.72165917	4	87.02169153	3	69.29136417	10	93.4066386	5	97.01798159	73.62508511	10	85.57372703	-413.265	93.15120252	-573	74.3619491	9	103.2905327	5	90.01558593	11	97.4198399	3	72.32266178	79.62841365	10.28263842	-0.837514524	1.640289929	16.26884117	20.72422176	4.013201299	-24.69531981	6.003328542	2	4
478	f	bachelors degree	22	y	Y	lumosity	lumosity.y	49	8.004981528	19	112.8487574	-84.028	128.9367294	-453	93.3614607	5	90.43034386	8	127.5555825	13	107.6954863	8	133.0119868	122.6513293	21	118.4923683	-110.016	122.7097698	-418	101.2497901	6	93.70903787	7	114.8036483	14	113.8168191	7	121.0680766	120.7529955	5.643610847	-6.226959606	7.888329422	3.278694015	-12.75193428	6.121332753	-11.94391021	-1.898333853	4	3
479	f	bachelors degree	46	y	M	crosswords	crosswords.y	62	16.83576889	22	121.4547391	-260.226	105.4580238	-471	89.77714362	14	119.1220614	5	90.01558593	16	127.595966	6	109.1710722	115.0481927	21	118.4923683	-218.239	109.0009546	-453	93.3614607	15	122.4665932	5	90.01558593	15	120.1949445	6	109.1710722	115.0914004	-2.962370769	3.54293076	3.584317078	3.344531828	0	-7.40102151	0	0.043207668	2	4
480	f	some college	39	y	Y	crosswords	crosswords.y	56	21.55380028	12	91.65967918	-313.294	100.8500751	-295	141.9590755	11	109.6062241	8	127.5555825	7	84.57097827	6	109.1710722	115.7552254	14	97.84621295	-360.225	96.82388725	-361	118.2244304	10	106.4827223	8	127.5555825	8	87.11355617	6	109.1710722	110.4591579	6.18653377	-4.026187843	-23.73464511	-3.123501776	0	2.542577902	0	-5.296067463	2	1
481	m	bachelors degree	24	y	Y	lumosity	lumosity.y	47	9.702820545	15	100.8687377	-164.372	114.2088377	-353	120.446814	16	125.4160785	7	114.8036483	12	102.1387281	6	109.1710722	121.1181551	15	100.8687377	-252.055	106.2543601	-324	130.239172	19	134.6704795	5	90.01558593	12	102.1387281	6	109.1710722	117.5714061	0	-7.954477637	9.792357996	9.254400988	-24.78806232	0	0	-3.546749022	1	3
482	f	some college	50	o	M	lumosity	lumosity.o	55	12.38029514	16	103.9697618	-268.303	104.4698927	-562	75.68757844	0	70.89374579	4	78.64839376	4	75.15990345	4	84.66554136	74.86137845	16	103.9697618	-332.441	99.27306663	-454	93.12637837	0	70.89374579	4	78.64839376	10	93.4066386	5	97.01798159	84.39279988	0	-5.196826092	17.43879992	0	0	18.24673514	12.35244023	9.531421429	1	3
483	m	NA	34	y	Y	crosswords	crosswords.y	65	15.91552528	15	100.8687377	-66.897	131.4411616	-396	107.3069857	12	112.8487574	7	114.8036483	12	102.1387281	6	109.1710722	119.0217124	11	88.54321663	-118.693	121.0680766	-407	104.3725965	12	112.8487574	7	114.8036483	17	137.1423714	6	109.1710722	121.3721521	-12.3255211	-10.37308494	-2.934389229	0	0	35.00364335	0	2.350439652	4	4
484	f	some college	39	y	Y	crosswords	crosswords.y	56	14.14450556	21	118.4923683	-201.849	110.3123492	-409	103.8964838	5	90.43034386	6	102.2366507	5	78.88184489	5	97.01798159	100.1117932	21	118.4923683	-419.318	92.50361529	-355	119.7341376	9	103.2905327	6	102.2366507	2	66.18670658	5	97.01798159	99.71304933	0	-17.80873391	15.83765383	12.86018885	0	-12.69513831	0	-0.398743846	3	4
485	m	some college	22	y	Y	lumosity	lumosity.y	52	18.42995806	11	88.54321663	-252.907	105.9185238	-460	91.91078039	5	90.43034386	6	102.2366507	4	75.15990345	6	109.1710722	90.90069883	16	103.9697618	-316.51	100.4509629	-419	100.9770084	2	80.40665395	5	90.01558593	12	102.1387281	6	109.1710722	96.66746564	15.42654515	-5.467560908	9.06622803	-10.02368991	-12.22106476	26.97882461	0	5.766766816	1	2
486	m	hs grad or less	29	y	Y	lumosity	lumosity.y	45	10.57273736	9	82.29468311	-285.119	103.0732927	-532	79.58145657	7	96.91529003	4	78.64839376	12	102.1387281	4	84.66554136	82.31709951	9	82.29468311	-497.529	87.0811887	-489	86.37006083	3	83.61639412	4	78.64839376	11	97.4198399	4	84.66554136	76.25224339	0	-15.99210405	6.788604265	-13.2988959	0	-4.718888164	0	-6.064856114	2	2
487	m	bachelors degree	20	y	Y	lumosity	lumosity.y	15	3.777985139	11	88.54321663	-422.46	92.19805583	-403	105.3347821	0	70.89374579	8	127.5555825	13	107.6954863	5	97.01798159	97.16606879	15	100.8687377	-101.001	123.7738898	-409	103.8964838	11	109.6062241	7	114.8036483	13	107.6954863	4	84.66554136	110.9592123	12.3255211	31.57583396	-1.438298336	38.71247827	-12.75193428	0	-12.35244023	13.79314347	2	3
488	f	bachelors degree	70	o	O	lumosity	lumosity.o	68	20.25668458	10	85.57372703	-690.454	75.39183022	-543	78.02460735	8	100.0782549	0	61.31611067	12	102.1387281	0	59.35814637	67.59046395	14	97.84621295	-552.72	83.59608053	-520	81.52355631	10	106.4827223	4	78.64839376	10	93.4066386	5	97.01798159	84.80936592	12.27248593	8.204250308	3.498948965	6.404467432	17.33228309	-8.732089463	37.65983522	17.21890197	4	3
489	m	advanced degree	34	y	Y	lumosity	lumosity.y	49	18.56761611	17	106.9689563	-218.239	109.0009546	-414	102.4290109	13	116.0032086	8	127.5555825	14	113.8168191	8	133.0119868	126.9163813	18	109.8684494	-82.213	129.8513839	-454	93.12637837	14	119.1220614	7	114.8036483	14	113.8168191	8	133.0119868	127.8009453	2.899493105	20.85042938	-9.30263255	3.118852745	-12.75193428	0	0	0.884563954	3	5
490	f	some college	41	y	M	lumosity	lumosity.y	55	11.63798972	15	100.8687377	-321.254	100.1527852	-400	106.1123696	11	109.6062241	5	90.01558593	12	102.1387281	5	97.01798159	101.2086618	15	100.8687377	-186.398	112.2616031	-439	96.43789596	5	90.43034386	5	90.01558593	9	90.06668352	6	109.1710722	97.1698622	0	12.10881783	-9.674473691	-19.17588021	0	-12.07204455	12.15309064	-4.038799587	4	4
491	f	advanced degree	29	y	Y	crosswords	crosswords.y	12	2.355326389	18	109.8684494	-209.268	109.5605231	-581	73.46625424	10	106.4827223	3	69.29136417	6	81.96893327	3	72.32266178	81.09429572	16	103.9697618	-607.204	80.22150667	-581	73.46625424	10	106.4827223	4	78.64839376	12	102.1387281	4	84.66554136	82.82216314	-5.898687608	-29.33901638	0	0	9.357029587	20.16979479	12.34287958	1.727867417	3	1
492	f	advanced degree	62	o	M	lumosity	lumosity.o	38	10.16181042	19	112.8487574	-545.051	83.95723497	-430	98.36085186	11	109.6062241	5	90.01558593	11	97.4198399	4	84.66554136	94.31439832	22	121.4547391	-217.51	109.1665804	-423	99.9031128	13	116.0032086	7	114.8036483	13	107.6954863	5	97.01798159	115.8656293	8.605981616	25.20934543	1.542260938	6.396984543	24.78806232	10.27564642	12.35244023	21.55123094	4	3
493	f	advanced degree	42	y	M	lumosity	lumosity.y	12	2.081344722	19	112.8487574	-504.616	86.2627237	-491	86.02866905	15	122.4665932	4	78.64839376	7	84.57097827	5	97.01798159	91.92801365	16	103.9697618	-232.182	106.9689563	-445	95.02101858	17	128.2711147	5	90.01558593	10	93.4066386	6	109.1710722	106.564643	-8.878995662	20.70623258	8.99234953	5.80452153	11.36719217	8.835660325	12.15309064	14.63662932	4	1
494	m	bachelors degree	21	y	Y	lumosity	lumosity.y	48	11.76722961	12	91.65967918	-356.547	97.45009021	-410	103.5889406	9	103.2905327	6	102.2366507	9	90.06668352	5	97.01798159	96.28054536	13	94.8395275	-427.918	91.82445315	-391	108.8231249	11	109.6062241	6	102.2366507	10	93.4066386	4	84.66554136	96.29207249	3.179848312	-5.625637061	5.23418436	6.315691356	0	3.339955082	-12.35244023	0.011527137	3	4
495	f	bachelors degree	22	y	Y	crosswords	crosswords.y	45	11.50853583	22	121.4547391	-436.278	91.13253476	-332	127.6365504	23	145.5755964	7	114.8036483	13	107.6954863	6	109.1710722	128.7943081	21	118.4923683	-427.867	92.01831437	-323	130.5586937	19	134.6704795	7	114.8036483	14	113.8168191	5	97.01798159	124.913806	-2.962370769	0.885779605	2.922143247	-10.90511686	0	6.121332753	-12.15309064	-3.880502173	2	1
496	m	hs grad or less	25	y	Y	lumosity	lumosity.y	11	2.811577778	14	97.84621295	-217.51	109.1665804	-591	71.92456952	5	90.43034386	5	90.01558593	11	97.4198399	5	97.01798159	88.43316164	11	88.54321663	-232.7	106.8736216	-394	107.9902732	4	87.02169153	6	102.2366507	10	93.4066386	5	97.01798159	95.73615747	-9.302996324	-2.292958767	36.06570368	-3.408652324	12.22106476	-4.013201299	0	7.302995824	3	1
497	f	some college	18	y	Y	crosswords	crosswords.y	31	6.067078611	12	91.65967918	-417.48	92.67622633	-400	106.1123696	18	131.5085227	7	114.8036483	15	120.1949445	7	121.0680766	118.7744932	14	97.84621295	-226.823	108.1064635	-390	109.1082611	11	109.6062241	7	114.8036483	12	102.1387281	5	97.01798159	109.5377058	6.18653377	15.43023721	2.995891491	-21.90229859	0	-18.0562164	-24.05009504	-9.236787427	2	5
498	f	hs grad or less	34	y	Y	crosswords	crosswords.y	10	2.260380833	6	71.50566007	-227.133	108.0117536	-420	100.6933581	11	109.6062241	6	102.2366507	9	90.06668352	6	109.1710722	97.70304208	7	75.29108861	-408.355	93.45995369	-483	87.46044138	4	87.02169153	6	102.2366507	12	102.1387281	6	109.1710722	89.34991673	3.785428537	-14.55179989	-13.23291674	-22.58453253	0	12.07204455	0	-8.353125349	4	4
500	m	some college	46	y	M	lumosity	lumosity.y	48	11.91697347	12	91.65967918	-141.426	118.4287944	-479	88.32752517	11	109.6062241	8	127.5555825	12	102.1387281	7	121.0680766	114.1389567	11	88.54321663	-340.249	98.82871971	-420	100.6933581	12	112.8487574	7	114.8036483	17	137.1423714	9	144.874283	123.7738898	-3.116462554	-19.60007468	12.36583294	3.242533378	-12.75193428	35.00364335	23.80620642	9.634933085	1	4
501	m	bachelors degree	31	y	Y	lumosity	lumosity.y	59	11.48804569	15	100.8687377	-332.441	99.27306663	-349	121.8885759	12	112.8487574	5	90.01558593	6	81.96893327	5	97.01798159	100.7306642	14	97.84621295	-357.848	96.99137146	-421	100.3950446	6	93.70903787	6	102.2366507	14	113.8168191	6	109.1710722	103.3248958	-3.022524772	-2.281695163	-21.49353136	-19.13971957	12.22106476	31.8478858	12.15309064	2.594231581	3	4
502	f	some college	36	y	Y	lumosity	lumosity.y	55	20.6158725	14	97.84621295	-565.302	82.61958395	-415	102.1086165	10	106.4827223	5	90.01558593	6	81.96893327	5	97.01798159	89.70652181	14	97.84621295	-216.89	109.3062128	-385	110.621335	11	109.6062241	7	114.8036483	13	107.6954863	5	97.01798159	111.2928469	0	26.68662887	8.512718461	3.123501776	24.78806232	25.72655305	0	21.58632509	1	4
504	m	advanced degree	30	y	Y	crosswords	crosswords.y	31	12.54074806	14	97.84621295	-392.261	94.40238768	-446	94.76830456	8	100.0782549	6	102.2366507	8	87.11355617	5	97.01798159	93.4066386	16	103.9697618	-173.992	113.1470924	-401	105.8259904	7	96.91529003	6	102.2366507	12	102.1387281	5	97.01798159	105.006552	6.123548824	18.74470472	11.05768589	-3.162964829	0	15.02517189	0	11.59991339	3	1
505	f	bachelors degree	63	o	M	lumosity	lumosity.o	37	11.03586236	9	82.29468311	-470.834	89.2248855	-498	84.92095746	6	93.70903787	3	69.29136417	10	93.4066386	0	59.35814637	70.51742244	9	82.29468311	-547.977	83.73765002	-542	78.17605863	0	70.89374579	3	69.29136417	10	93.4066386	3	72.32266178	65.69612425	0	-5.487235475	-6.744898834	-22.81529208	0	0	12.96451541	-4.821298188	3	1
506	f	hs grad or less	67	o	O	crosswords	crosswords.o	40	12.05519694	12	91.65967918	-266.321	104.5556691	-527	80.31004621	5	90.43034386	5	90.01558593	4	75.15990345	3	72.32266178	77.25499983	14	97.84621295	-307.241	101.2049233	-452	93.53363859	7	96.91529003	5	90.01558593	8	87.11355617	5	97.01798159	90.9856574	6.18653377	-3.350745782	13.22359238	6.484946169	0	11.95365272	24.69531981	13.73065757	4	4
507	m	bachelors degree	35	y	Y	lumosity	lumosity.y	45	9.809399583	14	97.84621295	-110.016	122.7097698	-420	100.6933581	7	96.91529003	6	102.2366507	15	120.1949445	7	121.0680766	114.8157819	19	112.8487574	-110.016	122.7097698	-510	82.87947047	9	103.2905327	5	90.01558593	10	93.4066386	8	133.0119868	109.4284883	15.00254449	0	-17.81388765	6.375242681	-12.22106476	-26.78830587	11.94391021	-5.387293661	3	5
508	f	advanced degree	29	y	Y	lumosity	lumosity.y	26	5.472775851	14	97.84621295	-445.189	90.57605158	-626	68.5922826	7	96.91529003	5	90.01558593	12	102.1387281	7	121.0680766	91.75519599	11	88.54321663	-259.836	105.5696562	-477	88.67744719	8	100.0782549	7	114.8036483	12	102.1387281	6	109.1710722	101.9619422	-9.302996324	14.99360462	20.08516459	3.162964829	24.78806232	0	-11.89700439	10.20674622	1	4
509	f	advanced degree	23	y	Y	crosswords	crosswords.y	36	10.30225306	21	118.4923683	-221.969	108.4449083	-389	109.3559537	10	106.4827223	5	90.01558593	17	137.1423714	5	97.01798159	116.1754329	18	109.8684494	-85.28	127.8634635	-316	133.1820152	13	116.0032086	7	114.8036483	17	137.1423714	7	121.0680766	139.3417296	-8.6239189	19.41855523	23.82606153	9.520486319	24.78806232	0	24.05009504	23.16629667	4	5
510	m	advanced degree	50	o	M	crosswords	crosswords.o	48	14.01160778	14	97.84621295	-503.418	86.54370761	-399	106.4132415	10	106.4827223	5	90.01558593	15	120.1949445	4	84.66554136	97.94405825	17	106.9689563	-402.742	93.77814388	-454	93.12637837	7	96.91529003	5	90.01558593	14	113.8168191	7	121.0680766	103.6771992	9.122743327	7.23443627	-13.28686314	-9.567432261	0	-6.378125399	36.40253527	5.733140906	2	3
511	f	hs grad or less	57	o	M	lumosity	lumosity.o	37	10.03110833	18	109.8684494	-321.298	100.0409905	-567	75.14520953	15	122.4665932	6	102.2366507	14	113.8168191	5	97.01798159	104.837453	21	118.4923683	-387.938	94.78810047	-515	82.2422238	11	109.6062241	5	90.01558593	13	107.6954863	5	97.01798159	99.86212108	8.6239189	-5.252890029	7.097014271	-12.86036912	-12.22106476	-6.121332753	0	-4.975331877	1	1
512	f	advanced degree	51	o	M	crosswords	crosswords.o	59	15.14869528	15	100.8687377	-526.797	85.02558854	-427	99.01925723	7	96.91529003	5	90.01558593	16	127.595966	5	97.01798159	98.95576382	16	103.9697618	-290.774	102.6369078	-373	114.2907573	9	103.2905327	6	102.2366507	12	102.1387281	5	97.01798159	106.2218561	3.101024052	17.61131929	15.27150009	6.375242681	12.22106476	-25.45723791	0	7.266092301	4	5
513	m	bachelors degree	45	y	M	crosswords	crosswords.y	51	13.28209111	15	100.8687377	-440.892	90.88725766	-394	107.9902732	12	112.8487574	6	102.2366507	15	120.1949445	7	121.0680766	113.3452132	17	106.9689563	-271.677	104.1862985	-510	82.87947047	8	100.0782549	6	102.2366507	12	102.1387281	7	121.0680766	104.598613	6.100218555	13.29904079	-25.11080273	-12.77050259	0	-18.0562164	0	-8.746600139	4	4
514	m	some college	58	o	M	lumosity	lumosity.o	60	13.33852097	14	97.84621295	-505.473	86.18887544	-398	106.7043604	10	106.4827223	5	90.01558593	4	75.15990345	6	109.1710722	92.93542673	17	106.9689563	-142.668	117.9393078	-359	118.7337831	10	106.4827223	5	90.01558593	2	66.18670658	5	97.01798159	100.6224882	9.122743327	31.75043232	12.02942272	0	0	-8.973196874	-12.15309064	7.687061496	3	5
515	f	advanced degree	57	o	M	lumosity	lumosity.o	34	8.49697875	15	100.8687377	-716.107	74.00135838	-377	113.0162768	10	106.4827223	3	69.29136417	4	75.15990345	5	97.01798159	84.32219566	15	100.8687377	-640.987	77.85981242	-448	94.35441755	12	112.8487574	3	69.29136417	11	97.4198399	5	97.01798159	87.42870347	0	3.858454036	-18.66185928	6.366035154	0	22.25993644	0	3.106507809	4	4
516	f	advanced degree	33	y	Y	lumosity	lumosity.y	65	19.19232083	14	97.84621295	-854.799	66.8179848	-483	87.46044138	11	109.6062241	5	90.01558593	12	102.1387281	5	97.01798159	87.75920365	15	100.8687377	-155.402	115.9571997	-480	88.08386544	13	116.0032086	7	114.8036483	10	93.4066386	6	109.1710722	109.4557456	3.022524772	49.13921485	0.623424066	6.396984543	24.78806232	-8.732089463	12.15309064	21.69654196	4	2
517	m	some college	59	o	M	lumosity	lumosity.o	69	17.98885472	12	91.65967918	-391.296	94.52604736	-439	96.43789596	8	100.0782549	5	90.01558593	8	87.11355617	5	97.01798159	89.37387633	16	103.9697618	-184.97	112.6083954	-380	112.1319449	8	100.0782549	5	90.01558593	6	81.96893327	3	72.32266178	93.31210693	12.31008259	18.08234801	15.69404895	0	0	-5.144622908	-24.69531981	3.938230602	NA	NA
518	m	advanced degree	28	y	Y	lumosity	lumosity.y	24	5.165057639	12	91.65967918	-475.341	88.82553694	-360	118.4923683	5	90.43034386	6	102.2366507	13	107.6954863	7	121.0680766	104.806061	10	85.57372703	-261.277	105.2079414	-394	107.9902732	6	93.70903787	6	102.2366507	13	107.6954863	6	109.1710722	102.7315717	-6.085952157	16.3824045	-10.50209509	3.278694015	0	0	-11.89700439	-2.074489292	1	2
519	m	some college	26	y	Y	lumosity	lumosity.y	34	7.95377625	11	88.54321663	-433.99	91.42377682	-306	136.391296	6	93.70903787	7	114.8036483	11	97.4198399	6	109.1710722	107.6105985	10	85.57372703	-438.385	91.04807378	-301	138.8949492	10	106.4827223	8	127.5555825	11	97.4198399	8	133.0119868	119.5409917	-2.969489603	-0.375703043	2.503653269	12.77368442	12.75193428	0	23.8409146	11.93039324	3	4
520	f	bachelors degree	29	y	Y	lumosity	lumosity.y	66	37.51139542	16	103.9697618	-280.738	103.3554553	-465	90.96779549	10	106.4827223	5	90.01558593	13	107.6954863	6	109.1710722	102.7429386	22	121.4547391	-155.402	115.9571997	-380	112.1319449	15	122.4665932	6	102.2366507	14	113.8168191	6	109.1710722	123.643938	17.48497728	12.6017443	21.16414942	15.98387089	12.22106476	6.121332753	0	20.90099937	1	2
521	f	NA	23	y	Y	crosswords	crosswords.y	40	11.51914556	13	94.8395275	-188.541	111.9621709	-354	120.0483363	10	106.4827223	4	78.64839376	14	113.8168191	5	97.01798159	105.4460812	10	85.57372703	-38.146	141.5986594	-402	105.565664	13	116.0032086	6	102.2366507	10	93.4066386	6	109.1710722	112.7201578	-9.265800469	29.63648851	-14.48267222	9.520486319	23.58825693	-20.41018047	12.15309064	7.27407663	NA	1
522	m	bachelors degree	32	y	Y	crosswords	crosswords.y	21	3.113716944	16	103.9697618	-232.7	106.8736216	-500	84.58362209	5	90.43034386	5	90.01558593	9	90.06668352	5	97.01798159	90.79296345	14	97.84621295	-120.462	120.6949278	-453	93.3614607	5	90.43034386	6	102.2366507	3	70.96685372	7	121.0680766	99.02672586	-6.123548824	13.82130618	8.777838615	0	12.22106476	-19.0998298	24.05009504	8.23376241	3	4
523	f	NA	19	y	Y	lumosity	lumosity.y	4	0.780758194	19	112.8487574	-198.748	110.6069755	-339	125.2148302	9	103.2905327	5	90.01558593	1	58.40134056	5	97.01798159	99.24695003	14	97.84621295	-302.655	101.8567539	-354	120.0483363	8	100.0782549	7	114.8036483	7	84.57097827	6	109.1710722	106.8777608	-15.00254449	-8.750221553	-5.166493883	-3.212277852	24.78806232	26.16963771	12.15309064	7.630810795	2	3
524	NA	advanced degree	44	y	M	lumosity	lumosity.y	65	48.38163153	13	94.8395275	-535.45	84.39920131	-410	103.5889406	11	109.6062241	4	78.64839376	9	90.06668352	4	84.66554136	86.55484869	13	94.8395275	-252.907	105.9185238	-379	112.4394233	9	103.2905327	6	102.2366507	12	102.1387281	6	109.1710722	107.2860137	0	21.5193225	8.850482776	-6.315691356	23.58825693	12.07204455	24.50553087	20.731165	4	3
525	f	advanced degree	58	o	M	lumosity	lumosity.o	63	30.92157008	19	112.8487574	-221.969	108.4449083	-492	85.84360186	10	106.4827223	5	90.01558593	6	81.96893327	6	109.1710722	98.64921802	18	109.8684494	-111.781	122.2964448	-474	89.17176197	13	116.0032086	6	102.2366507	7	84.57097827	5	97.01798159	104.9907953	-2.980308053	13.85153658	3.328160114	9.520486319	12.22106476	2.602045007	-12.15309064	6.341577289	3	3
526	f	bachelors degree	50	o	M	lumosity	lumosity.o	62	45.1194875	18	109.8684494	-98.626	124.3124216	-380	112.1319449	7	96.91529003	6	102.2366507	7	84.57097827	5	97.01798159	106.6015711	22	121.4547391	-172.743	113.3507497	-388	109.6336875	6	93.70903787	6	102.2366507	13	107.6954863	5	97.01798159	110.9008989	11.58628967	-10.96167183	-2.498257401	-3.206252155	0	23.12450804	0	4.299327801	4	5
527	m	some college	46	y	M	lumosity	lumosity.y	49	9.910211389	21	118.4923683	-391.284	94.64933613	-393	108.3012051	5	90.43034386	8	127.5555825	14	113.8168191	6	109.1710722	114.9621498	15	100.8687377	-351.188	98.00422702	-370	115.2217812	7	96.91529003	6	102.2366507	16	127.595966	5	97.01798159	109.3559537	-17.62363056	3.354890899	6.920576155	6.484946169	-25.31893183	13.77914691	-12.15309064	-5.606196118	NA	4
528	NA	NA	20	y	Y	lumosity	lumosity.y	51	13.64068389	19	112.8487574	-202.24	110.0356278	-440	96.21518319	17	128.2711147	6	102.2366507	4	75.15990345	6	109.1710722	108.2968624	20	115.7229157	-236.579	106.6632072	-374	114.0404806	16	125.4160785	6	102.2366507	9	90.06668352	6	109.1710722	115.2030851	2.874158287	-3.372420613	17.82529746	-2.85503617	0	14.90678006	0	6.906222688	3	4
529	m	some college	20	y	Y	lumosity	lumosity.y	9	2.080404444	17	106.9689563	-138.833	118.9801506	-452	93.53363859	0	70.89374579	6	102.2366507	13	107.6954863	5	97.01798159	99.23202524	17	106.9689563	-264.024	104.8570837	-372	114.5570077	15	122.4665932	6	102.2366507	5	78.88184489	5	97.01798159	106.5892573	0	-14.12306689	21.0233691	51.57284739	0	-28.81364142	0	7.357232054	4	2
530	f	some college	56	o	M	crosswords	crosswords.o	54	13.56551556	15	100.8687377	-427.867	92.01831437	-511	82.72850025	4	87.02169153	5	90.01558593	11	97.4198399	6	109.1710722	89.95038454	16	103.9697618	-677.522	76.02777107	-447	94.56585795	10	106.4827223	4	78.64839376	7	84.57097827	6	109.1710722	88.32752517	3.101024052	-15.99054329	11.8373577	19.46103075	-11.36719217	-12.84886162	0	-1.62285937	1	1
532	m	bachelors degree	64	o	M	crosswords	crosswords.o	58	15.08392917	16	103.9697618	-641.073	77.82653096	-453	93.3614607	5	90.43034386	6	102.2366507	14	113.8168191	5	97.01798159	94.79205857	13	94.8395275	-547.115	83.8312305	-436	97.04838168	7	96.91529003	5	90.01558593	12	102.1387281	5	97.01798159	90.52606548	-9.130234283	6.004699539	3.68692098	6.484946169	-12.22106476	-11.678091	0	-4.265993089	4	2
533	f	bachelors degree	22	y	Y	lumosity	lumosity.y	39	7.671058715	17	106.9689563	-310.226	100.9695399	-494	85.51443857	4	87.02169153	6	102.2366507	11	97.4198399	5	97.01798159	94.38640402	14	97.84621295	-510.88	85.80283053	-414	102.4290109	0	70.89374579	6	102.2366507	11	97.4198399	6	109.1710722	91.49826864	-9.122743327	-15.16670938	16.91457235	-16.12794574	0	0	12.15309064	-2.888135379	2	3
534	m	advanced degree	23	y	Y	lumosity	lumosity.y	44	13.61481811	21	118.4923683	-201.849	110.3123492	-503	84.04936081	6	93.70903787	6	102.2366507	16	127.595966	7	121.0680766	113.805432	21	118.4923683	-327.397	99.61613842	-394	107.9902732	12	112.8487574	6	102.2366507	16	127.595966	7	121.0680766	121.8132083	0	-10.69621079	23.94091239	19.13971957	0	0	0	8.007776212	4	3
535	NA	some college	56	o	M	lumosity	lumosity.o	51	13.08930375	13	94.8395275	-209.09	109.6978949	-374	114.0404806	10	106.4827223	4	78.64839376	8	87.11355617	5	97.01798159	96.86960317	15	100.8687377	-161.339	114.6587923	-411	103.29435	7	96.91529003	6	102.2366507	10	93.4066386	3	72.32266178	95.88339564	6.02921023	4.960897406	-10.74613068	-9.567432261	23.58825693	6.293082423	-24.69531981	-0.986207533	4	3
536	f	some college	58	o	M	crosswords	crosswords.o	63	24.51362917	14	97.84621295	-302.762	101.8004409	-470	89.9830089	8	100.0782549	7	114.8036483	13	107.6954863	4	84.66554136	99.09019971	12	91.65967918	-85.302	126.860641	-379	112.4394233	7	96.91529003	5	90.01558593	9	90.06668352	7	121.0680766	106.9772595	-6.18653377	25.06020005	22.45641445	-3.162964829	-24.78806232	-17.6288028	36.40253527	7.887059804	1	4
537	m	advanced degree	34	y	Y	crosswords	crosswords.y	47	15.28202528	16	103.9697618	-306.514	101.3844593	-356	119.4715541	7	96.91529003	7	114.8036483	11	97.4198399	7	121.0680766	113.0706625	21	118.4923683	-372.944	95.94527137	-345	123.1166272	9	103.2905327	6	102.2366507	7	84.57097827	6	109.1710722	109.0590214	14.52260651	-5.439187942	3.645073057	6.375242681	-12.56699756	-12.84886162	-11.89700439	-4.011641071	3	4
538	f	bachelors degree	52	o	M	crosswords	crosswords.o	64	20.57407528	19	112.8487574	-243.907	106.5400463	-432	97.8951468	14	119.1220614	6	102.2366507	11	97.4198399	5	97.01798159	108.0547637	23	124.4099523	-432.159	91.71616155	-532	79.58145657	16	125.4160785	6	102.2366507	8	87.11355617	4	84.66554136	98.69036998	11.56119486	-14.82388476	-18.31369023	6.294017188	0	-10.30628372	-12.35244023	-9.364393762	1	3
539	m	some college	31	y	Y	lumosity	lumosity.y	55	13.2003225	11	88.54321663	-274.828	103.7079275	-420	100.6933581	13	116.0032086	7	114.8036483	13	107.6954863	5	97.01798159	106.8984646	15	100.8687377	-234.552	106.828125	-361	118.2244304	12	112.8487574	7	114.8036483	14	113.8168191	7	121.0680766	121.4133644	12.3255211	3.120197496	17.53107228	-3.154451166	0	6.121332753	24.05009504	14.51489979	1	1
540	f	hs grad or less	62	o	M	crosswords	crosswords.o	70	19.12546833	18	109.8684494	-372.944	95.94527137	-519	81.68167022	7	96.91529003	5	90.01558593	11	97.4198399	4	84.66554136	89.29710968	14	97.84621295	-496.92	87.17811182	-461	91.72050148	1	77.29023023	5	90.01558593	12	102.1387281	3	72.32266178	80.15911659	-12.02223643	-8.767159549	10.03883126	-19.62505979	0	4.718888164	-12.34287958	-9.137993091	2	3
541	f	advanced degree	35	y	Y	lumosity	lumosity.y	19	3.497773194	19	112.8487574	-465.891	89.35950383	-402	105.565664	12	112.8487574	6	102.2366507	12	102.1387281	4	84.66554136	102.1839115	18	109.8684494	-189.556	111.7280398	-393	108.3012051	14	119.1220614	5	90.01558593	13	107.6954863	6	109.1710722	113.2954656	-2.980308053	22.36853596	2.735541049	6.273303911	-12.22106476	5.556758251	24.50553087	11.1115541	3	1
542	f	bachelors degree	35	y	Y	lumosity	lumosity.y	32	5.615649028	14	97.84621295	-357.848	96.99137146	-414	102.4290109	6	93.70903787	7	114.8036483	15	120.1949445	5	97.01798159	105.501843	10	85.57372703	-216.89	109.3062128	-411	103.29435	11	109.6062241	6	102.2366507	15	120.1949445	4	84.66554136	103.5008061	-12.27248593	12.31484136	0.865339053	15.89718619	-12.56699756	0	-12.35244023	-2.001036938	3	2
543	m	some college	24	y	Y	lumosity	lumosity.y	42	8.091978472	14	97.84621295	-86.562	126.1676356	-372	114.5570077	7	96.91529003	7	114.8036483	16	127.595966	5	97.01798159	118.1544718	15	100.8687377	-227.431	107.7337662	-446	94.76830456	4	87.02169153	9	140.9426022	16	127.595966	5	97.01798159	113.306508	3.022524772	-18.43386936	-19.78870313	-9.893598494	26.138954	0	0	-4.847963782	4	3
544	m	some college	29	y	Y	lumosity	lumosity.y	47	12.39405944	13	94.8395275	-609.737	80.11434122	-441	95.98777089	8	100.0782549	5	90.01558593	14	113.8168191	5	97.01798159	92.99366231	13	94.8395275	-432.278	91.64662801	-448	94.35441755	12	112.8487574	5	90.01558593	13	107.6954863	5	97.01798159	96.99517349	0	11.53228679	-1.633353334	12.77050259	0	-6.121332753	0	4.001511182	1	3
545	f	bachelors degree	28	y	Y	lumosity	lumosity.y	52	77.5574175	13	94.8395275	-161.009	114.9928228	-497	85.11121134	10	106.4827223	5	90.01558593	11	97.4198399	5	97.01798159	96.38804755	9	82.29468311	-720.238	73.83236442	-431	98.13198035	12	112.8487574	5	90.01558593	12	102.1387281	4	84.66554136	86.1318405	-12.54484439	-41.16045834	13.020769	6.366035154	0	4.718888164	-12.35244023	-10.25620705	1	2
546	f	NA	45	y	M	lumosity	lumosity.y	53	10.22292917	13	94.8395275	-432.278	91.64662801	-399	106.4132415	9	103.2905327	6	102.2366507	12	102.1387281	5	97.01798159	99.29171998	12	91.65967918	-383.92	95.18609297	-434	97.43874756	5	90.43034386	5	90.01558593	11	97.4198399	5	97.01798159	89.93638812	-3.179848312	3.539464955	-8.974493947	-12.86018885	-12.22106476	-4.718888164	0	-9.355331862	4	5
547	m	some college	71	o	O	crosswords	crosswords.o	58	14.61952583	8	78.75052699	-529.175	84.84044773	-357	119.1978885	3	83.61639412	5	90.01558593	5	78.88184489	5	97.01798159	83.4598804	11	88.54321663	-893.062	64.82548842	-397	107.0063377	4	87.02169153	5	90.01558593	11	97.4198399	5	97.01798159	83.31538702	9.792689645	-20.01495932	-12.19155077	3.405297409	0	18.537995	0	-0.144493383	NA	4
548	m	some college	20	y	Y	crosswords	crosswords.y	2	0.183321944	8	78.75052699	-633.829	78.04638052	-383	111.3076943	10	106.4827223	6	102.2366507	6	81.96893327	6	109.1710722	91.95384357	15	100.8687377	-457.358	89.59778938	-400	106.1123696	3	83.61639412	6	102.2366507	9	90.06668352	6	109.1710722	95.40138697	22.11821074	11.55140886	-5.195324663	-22.86632816	0	8.097750249	0	3.447543399	4	4
549	f	advanced degree	57	o	M	crosswords	crosswords.o	70	23.91405139	20	115.7229157	-306.514	101.3844593	-428	98.81002988	15	122.4665932	4	78.64839376	12	102.1387281	4	84.66554136	100.7157412	17	106.9689563	-231.779	107.1855449	-428	98.81002988	10	106.4827223	3	69.29136417	9	90.06668352	4	84.66554136	90.91413269	-8.753959446	5.801085607	0	-15.98387089	-9.357029587	-12.07204455	0	-9.801608537	2	4
550	f	some college	23	y	Y	crosswords	crosswords.y	14	3.724459167	13	94.8395275	-227.431	107.7337662	-351	121.0980955	0	70.89374579	7	114.8036483	10	93.4066386	5	97.01798159	99.85094136	7	75.29108861	-202.24	110.0356278	-312	134.6168278	2	80.40665395	6	102.2366507	10	93.4066386	6	109.1710722	101.0330301	-19.54843889	2.301861555	13.51873227	9.512908155	-12.56699756	0	12.15309064	1.182088776	3	4
551	f	hs grad or less	18	y	Y	lumosity	lumosity.y	44	7.079677346	19	112.8487574	-227.431	107.7337662	-396	107.3069857	12	112.8487574	6	102.2366507	10	93.4066386	7	121.0680766	113.794053	18	109.8684494	-217.51	109.1665804	-412	103.0124308	13	116.0032086	6	102.2366507	11	97.4198399	6	109.1710722	111.2928469	-2.980308053	1.432814178	-4.294554985	3.154451166	0	4.013201299	-11.89700439	-2.501206082	4	3
552	f	hs grad or less	53	o	M	lumosity	lumosity.o	61	13.31849806	4	63.24467989	-146.632	117.2932101	-463	91.33146433	5	90.43034386	5	90.01558593	9	90.06668352	5	97.01798159	84.98874333	5	67.59046395	-510.493	85.81449018	-383	111.3076943	4	87.02169153	6	102.2366507	12	102.1387281	6	109.1710722	91.37546339	4.345784058	-31.47871992	19.97622998	-3.408652324	12.22106476	12.07204455	12.15309064	6.386720065	3	2
553	f	bachelors degree	27	y	Y	crosswords	crosswords.y	9	2.224759444	16	103.9697618	-308.27	101.0405008	-498	84.92095746	4	87.02169153	7	114.8036483	12	102.1387281	7	121.0680766	103.5276167	19	112.8487574	-292.756	102.4290109	-426	99.23202524	4	87.02169153	7	114.8036483	12	102.1387281	6	109.1710722	106.6796624	8.878995662	1.38851015	14.31106778	0	0	0	-11.89700439	3.152045752	1	1
554	m	advanced degree	31	y	Y	lumosity	lumosity.y	46	8.601579444	17	106.9689563	-268.303	104.4698927	-320	131.4077174	8	100.0782549	6	102.2366507	13	107.6954863	4	84.66554136	109.29718	17	106.9689563	-297.449	102.0371355	-328	129.2296594	8	100.0782549	5	90.01558593	16	127.595966	5	97.01798159	112.6243185	0	-2.432757219	-2.178057987	0	-12.22106476	19.90047966	12.35244023	3.327138471	3	4
555	f	some college	61	o	M	lumosity	lumosity.o	65	85.02994736	19	112.8487574	-270.266	104.3415007	-401	105.8259904	14	119.1220614	6	102.2366507	4	75.15990345	6	109.1710722	106.9150371	22	121.4547391	-335.954	98.93708578	-357	119.1978885	13	116.0032086	6	102.2366507	15	120.1949445	7	121.0680766	124.2022019	8.605981616	-5.404414955	13.37189801	-3.118852745	0	45.03504101	11.89700439	17.28716473	4	2
556	f	NA	32	y	Y	crosswords	crosswords.y	39	7.775611111	9	82.29468311	-699.08	74.92188146	-430	98.36085186	7	96.91529003	6	102.2366507	5	78.88184489	4	84.66554136	80.06037579	9	82.29468311	-795.297	69.52982653	-401	105.8259904	7	96.91529003	5	90.01558593	3	70.96685372	5	97.01798159	78.93192337	0	-5.392054935	7.465138584	0	-12.22106476	-7.914991175	12.35244023	-1.128452416	2	4
557	f	advanced degree	21	y	Y	lumosity	lumosity.y	48	13.43295334	12	91.65967918	-198.748	110.6069755	-472	89.57882363	10	106.4827223	6	102.2366507	12	102.1387281	7	121.0680766	105.7577386	12	91.65967918	-226.823	108.1064635	-431	98.13198035	10	106.4827223	6	102.2366507	10	93.4066386	5	97.01798159	99.14619248	0	-2.50051195	8.553156714	0	0	-8.732089463	-24.05009504	-6.611546154	3	3
558	m	bachelors degree	46	y	M	lumosity	lumosity.y	55	11.70378958	13	94.8395275	-290.774	102.6369078	-391	108.8231249	11	109.6062241	6	102.2366507	13	107.6954863	4	84.66554136	102.4629974	15	100.8687377	-161.339	114.6587923	-428	98.81002988	9	103.2905327	5	90.01558593	11	97.4198399	4	84.66554136	97.30630667	6.02921023	12.02188447	-10.01309504	-6.315691356	-12.22106476	-10.27564642	0	-5.156690772	3	4
559	m	advanced degree	30	y	Y	crosswords	crosswords.y	54	15.43724278	15	100.8687377	-188.541	111.9621709	-305	136.607115	7	96.91529003	6	102.2366507	17	137.1423714	3	72.32266178	113.9885905	15	100.8687377	-413.265	93.15120252	-476	88.83045447	10	106.4827223	6	102.2366507	16	127.595966	5	97.01798159	103.7848168	0	-18.8109684	-47.77666057	9.567432261	0	-9.546405435	24.69531981	-10.20377369	2	2
560	m	advanced degree	27	y	Y	lumosity	lumosity.y	19	5.675707503	9	82.29468311	-84.028	128.9367294	-374	114.0404806	9	103.2905327	7	114.8036483	12	102.1387281	5	97.01798159	110.3029117	15	100.8687377	-351.792	97.90267308	-346	122.8514513	9	103.2905327	6	102.2366507	16	127.595966	6	109.1710722	115.378512	18.57405462	-31.03405629	8.810970639	0	-12.56699756	25.45723791	12.15309064	5.075600366	4	5
561	m	some college	22	y	Y	lumosity	lumosity.y	51	36.78459598	17	106.9689563	-597.676	80.64040018	-396	107.3069857	10	106.4827223	8	127.5555825	12	102.1387281	6	109.1710722	109.891595	19	112.8487574	-290.774	102.6369078	-382	111.5668384	18	131.5085227	7	114.8036483	13	107.6954863	5	97.01798159	118.7989858	5.879801159	21.99650765	4.259852618	25.02580037	-12.75193428	5.556758251	-12.15309064	8.907390863	3	4
562	f	some college	30	y	Y	crosswords	crosswords.y	35	10.74396389	9	82.29468311	-172.743	113.3507497	-526	80.51978898	8	100.0782549	7	114.8036483	7	84.57097827	7	121.0680766	99.03046009	11	88.54321663	-192.333	111.5969615	-459	92.11688449	7	96.91529003	7	114.8036483	11	97.4198399	7	121.0680766	105.3308126	6.248533522	-1.753788246	11.59709551	-3.162964829	0	12.84886162	0	6.300352526	3	3
563	m	bachelors degree	25	y	Y	lumosity	lumosity.y	55	22.85891097	21	118.4923683	-352.224	97.77088515	-398	106.7043604	10	106.4827223	6	102.2366507	8	87.11355617	5	97.01798159	103.6964026	25	129.8784281	-459.105	89.50279329	-344	123.4396335	2	80.40665395	5	90.01558593	12	102.1387281	5	97.01798159	102.9668168	11.38605982	-8.268091858	16.73527308	-26.07606834	-12.22106476	15.02517189	0	-0.729585719	3	2
564	f	advanced degree	27	y	Y	lumosity	lumosity.y	62	23.0559925	11	88.54321663	-509.644	85.93640305	-416	101.8154552	5	90.43034386	7	114.8036483	16	127.595966	6	109.1710722	104.2366892	11	88.54321663	-373.533	95.87952609	-396	107.3069857	8	100.0782549	6	102.2366507	16	127.595966	6	109.1710722	107.4289074	0	9.943123032	5.491530508	9.647910998	-12.56699756	0	0	3.192218163	4	4
565	f	hs grad or less	20	y	Y	crosswords	crosswords.y	5	1.006325556	9	82.29468311	-500.792	86.80359336	-364	117.264271	10	106.4827223	6	102.2366507	12	102.1387281	5	97.01798159	98.49948647	9	82.29468311	-186.398	112.2616031	-366	116.6156143	6	93.70903787	7	114.8036483	11	97.4198399	6	109.1710722	106.4091587	0	25.45800971	-0.648656692	-12.77368442	12.56699756	-4.718888164	12.15309064	7.909672236	3	3
566	f	some college	24	y	Y	lumosity	lumosity.y	11	2.98352	16	103.9697618	-435.29	91.26973999	-383	111.3076943	3	83.61639412	5	90.01558593	14	113.8168191	5	97.01798159	97.61251126	11	88.54321663	-352.548	97.67664605	-380	112.1319449	14	119.1220614	7	114.8036483	11	97.4198399	4	84.66554136	103.3860289	-15.42654515	6.40690606	0.824250596	35.50566723	24.78806232	-16.39697917	-12.35244023	5.773517607	2	1
567	m	hs grad or less	36	y	Y	crosswords	crosswords.y	47	13.39692444	18	109.8684494	-142.668	117.9393078	-465	90.96779549	15	122.4665932	5	90.01558593	5	78.88184489	6	109.1710722	104.5244606	22	121.4547391	-91.81	125.526366	-394	107.9902732	14	119.1220614	7	114.8036483	12	102.1387281	7	121.0680766	127.6773382	11.58628967	7.587058237	17.02247771	-3.344531828	24.78806232	23.25688317	11.89700439	23.15287763	4	5
568	f	advanced degree	67	o	O	lumosity	lumosity.o	48	13.06156875	5	67.59046395	-490.204	87.76959818	-591	71.92456952	0	70.89374579	4	78.64839376	13	107.6954863	4	84.66554136	69.64622709	13	94.8395275	-681.868	75.81148404	-501	84.4055999	1	77.29023023	4	78.64839376	12	102.1387281	5	97.01798159	78.44110381	27.24906355	-11.95811414	12.48103037	6.396484438	0	-5.556758251	12.35244023	8.79487672	1	2
569	f	some college	55	o	M	lumosity	lumosity.o	44	42.25018375	9	82.29468311	-450.023	90.00628302	-483	87.46044138	5	90.43034386	5	90.01558593	10	93.4066386	4	84.66554136	80.07839292	10	85.57372703	-332.441	99.27306663	-449	94.14184935	6	93.70903787	5	90.01558593	4	75.15990345	4	84.66554136	80.96995768	3.279043918	9.266783608	6.681407979	3.278694015	0	-18.24673514	0	0.891564758	2	4
570	m	some college	22	y	Y	lumosity	lumosity.y	52	10.9797175	20	115.7229157	-217.51	109.1665804	-334	126.7685565	12	112.8487574	6	102.2366507	15	120.1949445	7	121.0680766	126.842143	21	118.4923683	-483.891	88.17560324	-399	106.4132415	14	119.1220614	6	102.2366507	14	113.8168191	7	121.0680766	116.7123115	2.76945256	-20.99097716	-20.35531499	6.273303911	0	-6.378125399	0	-10.12983153	2	2
571	f	advanced degree	53	o	M	crosswords	crosswords.o	50	15.19913583	18	109.8684494	-227.431	107.7337662	-419	100.9770084	10	106.4827223	5	90.01558593	11	97.4198399	5	97.01798159	102.153787	19	112.8487574	-398.125	94.08147619	-460	91.91078039	12	112.8487574	4	78.64839376	10	93.4066386	4	84.66554136	92.04406139	2.980308053	-13.65229003	-9.06622803	6.366035154	-11.36719217	-4.013201299	-12.35244023	-10.10972566	1	5
572	f	some college	56	o	M	lumosity	lumosity.o	67	48.50619139	20	115.7229157	-497.987	86.96742546	-358	118.9387339	2	80.40665395	6	102.2366507	15	120.1949445	6	109.1710722	108.1755469	24	127.258891	-448.592	90.04811594	-353	120.446814	3	83.61639412	7	114.8036483	14	113.8168191	8	133.0119868	120.1305667	11.53597528	3.080690477	1.508080073	3.209740174	12.56699756	-6.378125399	23.8409146	11.95501984	3	4
573	f	bachelors degree	29	y	Y	lumosity	lumosity.y	55	21.24935694	16	103.9697618	-375.646	95.64295372	-415	102.1086165	6	93.70903787	6	102.2366507	11	97.4198399	7	121.0680766	103.78097	20	115.7229157	-474.234	88.96766226	-318	132.4095361	6	93.70903787	6	102.2366507	13	107.6954863	6	109.1710722	111.998055	11.75315395	-6.675291462	30.30091951	0	0	10.27564642	-11.89700439	8.217085029	3	3
574	f	some college	44	y	M	crosswords	crosswords.y	54	13.36703556	7	75.29108861	-680.332	75.97416651	-425	99.46328321	2	80.40665395	5	90.01558593	7	84.57097827	4	84.66554136	73.96782324	6	71.50566007	-452.199	89.94572004	-405	104.8688661	9	103.2905327	5	90.01558593	10	93.4066386	5	97.01798159	87.55532021	-3.785428537	13.97155353	5.405582879	22.88387876	0	8.835660325	12.35244023	13.58749698	4	4
576	m	bachelors degree	69	o	O	crosswords	crosswords.o	60	21.26446694	13	94.8395275	-638.911	77.90401886	-484	87.25312789	0	70.89374579	5	90.01558593	4	75.15990345	5	97.01798159	74.64633104	12	91.65967918	-335.954	98.93708578	-549	77.26675724	0	70.89374579	5	90.01558593	4	75.15990345	3	72.32266178	71.46024928	-3.179848312	21.03306692	-9.986370654	0	0	0	-24.69531981	-3.186081756	4	3
577	f	bachelors degree	31	y	Y	lumosity	lumosity.y	49	14.86048236	13	94.8395275	-139.313	118.7094231	-461	91.72050148	8	100.0782549	4	78.64839376	12	102.1387281	5	97.01798159	95.74003736	19	112.8487574	-155.402	115.9571997	-510	82.87947047	12	112.8487574	4	78.64839376	13	107.6954863	4	84.66554136	98.75020988	18.00922994	-2.752223494	-8.841031008	12.77050259	0	5.556758251	-12.35244023	3.010172516	4	4
578	f	hs grad or less	18	y	Y	crosswords	crosswords.y	65	15.14809861	22	121.4547391	-321.298	100.0409905	-455	92.86039548	18	131.5085227	6	102.2366507	11	97.4198399	5	97.01798159	110.3123492	24	127.258891	-151.86	116.747015	-493	85.69750507	17	128.2711147	4	78.64839376	8	87.11355617	6	109.1710722	108.0160516	5.804151954	16.70602453	-7.162890416	-3.237407947	-23.58825693	-10.30628372	12.15309064	-2.296297572	2	4
579	f	some college	22	y	Y	lumosity	lumosity.y	26	5.565668194	22	121.4547391	-315.19	100.495702	-366	116.6156143	11	109.6062241	7	114.8036483	12	102.1387281	6	109.1710722	117.9393078	17	106.9689563	-231.779	107.1855449	-453	93.3614607	0	70.89374579	6	102.2366507	5	78.88184489	7	121.0680766	95.15076961	-14.48578277	6.689842875	-23.25415361	-38.71247827	-12.56699756	-23.25688317	11.89700439	-22.78853815	1	2
580	f	NA	56	o	M	lumosity	lumosity.o	51	11.066175	12	91.65967918	-252.621	106.1164189	-421	100.3950446	8	100.0782549	5	90.01558593	6	81.96893327	3	72.32266178	85.79116231	13	94.8395275	-146.632	117.2932101	-397	107.0063377	5	90.43034386	6	102.2366507	5	78.88184489	4	84.66554136	93.85927646	3.179848312	11.17679124	6.611293127	-9.647910998	12.22106476	-3.087088375	12.34287958	8.068114152	4	2
581	m	NA	39	y	Y	lumosity	lumosity.y	52	11.54143694	20	115.7229157	-367.027	96.37270158	-388	109.6336875	11	109.6062241	7	114.8036483	11	97.4198399	6	109.1710722	112.6083954	20	115.7229157	-387.938	94.78810047	-373	114.2907573	5	90.43034386	6	102.2366507	13	107.6954863	5	97.01798159	105.259425	0	-1.584601103	4.657069807	-19.17588021	-12.56699756	10.27564642	-12.15309064	-7.348970328	4	3
582	f	advanced degree	27	y	Y	lumosity	lumosity.y	67	23.03717097	12	91.65967918	-427.918	91.82445315	-489	86.37006083	14	119.1220614	8	127.5555825	15	120.1949445	8	133.0119868	116.7887779	15	100.8687377	-176.823	113.0054202	-475	88.98718796	12	112.8487574	6	102.2366507	15	120.1949445	7	121.0680766	114.2731673	9.209058542	21.18096708	2.617127132	-6.273303911	-25.31893183	0	-11.94391021	-2.515610664	1	5
584	f	bachelors degree	31	y	Y	crosswords	crosswords.y	63	18.62273917	23	124.4099523	-280.738	103.3554553	-349	121.8885759	15	122.4665932	5	90.01558593	17	137.1423714	7	121.0680766	129.5341804	24	127.258891	-176.823	113.0054202	-403	105.3347821	13	116.0032086	6	102.2366507	17	137.1423714	6	109.1710722	127.2394869	2.848938706	9.649964878	-16.55379381	-6.463384573	12.22106476	0	-11.89700439	-2.294693518	4	4
585	m	some college	38	y	Y	crosswords	crosswords.y	66	23.37451028	17	106.9689563	-282.182	103.2714496	-399	106.4132415	11	109.6062241	6	102.2366507	15	120.1949445	6	109.1710722	113.9196629	23	124.4099523	-320.833	100.2608615	-394	107.9902732	10	106.4827223	7	114.8036483	16	127.595966	6	109.1710722	121.9210462	17.44099602	-3.010588111	1.57703169	-3.123501776	12.56699756	7.40102151	0	8.001383275	4	4
586	m	some college	29	y	Y	lumosity	lumosity.y	45	10.40001778	18	109.8684494	-321.254	100.1527852	-428	98.81002988	8	100.0782549	5	90.01558593	14	113.8168191	6	109.1710722	105.1762897	18	109.8684494	-15.849	147.9585436	-416	101.8154552	8	100.0782549	6	102.2366507	10	93.4066386	5	97.01798159	112.5289918	0	47.8057584	3.005425348	0	12.22106476	-20.41018047	-12.15309064	7.352702078	3	2
587	f	bachelors degree	63	o	M	lumosity	lumosity.o	55	12.14457806	6	71.50566007	-440.892	90.88725766	-544	77.83763691	7	96.91529003	4	78.64839376	10	93.4066386	3	72.32266178	72.46453453	10	85.57372703	-445.189	90.57605158	-529	79.91519138	6	93.70903787	5	90.01558593	14	113.8168191	3	72.32266178	81.89966869	14.06806695	-0.31120608	2.077554478	-3.206252155	11.36719217	20.41018047	0	9.435134163	1	1
588	m	bachelors degree	35	y	Y	lumosity	lumosity.y	61	12.9789212	14	97.84621295	-66.897	131.4411616	-393	108.3012051	13	116.0032086	6	102.2366507	12	102.1387281	5	97.01798159	113.0597716	18	109.8684494	-145.309	117.5197061	-361	118.2244304	9	103.2905327	7	114.8036483	14	113.8168191	5	97.01798159	117.992752	12.02223643	-13.92145546	9.923225303	-12.7126759	12.56699756	11.678091	0	4.932980367	3	4
589	m	hs grad or less	80	o	O	crosswords	crosswords.o	51	15.534405	11	88.54321663	-379.127	95.38185455	-519	81.68167022	4	87.02169153	0	61.31611067	11	97.4198399	4	84.66554136	75.39183022	15	100.8687377	-427.878	91.89784845	-531	79.72173356	3	83.61639412	5	90.01558593	11	97.4198399	4	84.66554136	82.50238743	12.3255211	-3.484006109	-1.959936656	-3.405297409	28.69947526	0	0	7.110557212	3	2
590	f	bachelors degree	20	y	Y	crosswords	crosswords.y	34	4.350673334	23	124.4099523	-236.579	106.6632072	-463	91.33146433	11	109.6062241	5	90.01558593	16	127.595966	6	109.1710722	114.1622162	25	129.8784281	-155.402	115.9571997	-411	103.29435	13	116.0032086	7	114.8036483	15	120.1949445	8	133.0119868	132.5258866	5.468475799	9.293992486	11.96288564	6.396984543	24.78806232	-7.40102151	23.8409146	18.36367038	3	3
591	m	bachelors degree	23	y	Y	crosswords	crosswords.y	50	10.33754944	8	78.75052699	-161.009	114.9928228	-384	110.9835584	2	80.40665395	7	114.8036483	15	120.1949445	5	97.01798159	103.9659027	12	91.65967918	-295.55	102.2215796	-336	126.0996401	10	106.4827223	7	114.8036483	9	90.06668352	4	84.66554136	103.7232975	12.9091522	-12.77124319	15.11608171	26.07606834	0	-30.12826095	-12.35244023	-0.242605184	3	4
592	m	hs grad or less	19	y	Y	crosswords	crosswords.y	62	31.98250694	13	94.8395275	-227.897	107.3910175	-384	110.9835584	14	119.1220614	6	102.2366507	12	102.1387281	6	109.1710722	111.0910274	8	78.75052699	-264.024	104.8570837	-347	122.5816515	10	106.4827223	7	114.8036483	12	102.1387281	6	109.1710722	109.5650892	-16.08900051	-2.533933808	11.59809313	-12.63933906	12.56699756	0	0	-1.525938263	NA	3
593	f	bachelors degree	64	o	M	lumosity	lumosity.o	7	0.951830417	23	124.4099523	-192.333	111.5969615	-532	79.58145657	12	112.8487574	6	102.2366507	10	93.4066386	3	72.32266178	98.94082152	22	121.4547391	-427.939	91.79417467	-581	73.46625424	12	112.8487574	0	61.31611067	7	84.57097827	3	72.32266178	79.9243206	-2.955213248	-19.80278682	-6.115202331	0	-40.92054002	-8.835660325	0	-19.01650092	2	3
594	m	advanced degree	33	y	Y	crosswords	crosswords.y	64	15.54045028	18	109.8684494	-285.614	102.997223	-382	111.5668384	4	87.02169153	7	114.8036483	10	93.4066386	5	97.01798159	103.8887757	13	94.8395275	-302.907	101.7141433	-445	95.02101858	8	100.0782549	6	102.2366507	12	102.1387281	8	133.0119868	106.9772595	-15.02892189	-1.283079702	-16.54581977	13.05656332	-12.56699756	8.732089463	35.99400524	3.088483768	4	4
595	m	advanced degree	58	o	M	crosswords	crosswords.o	62	17.15626194	20	115.7229157	-327.339	99.72050347	-373	114.2907573	8	100.0782549	5	90.01558593	3	70.96685372	7	121.0680766	102.8491067	16	103.9697618	-646.036	77.73724256	-351	121.0980955	8	100.0782549	5	90.01558593	5	78.88184489	7	121.0680766	98.15826538	-11.75315395	-21.98326091	6.807338178	0	0	7.914991175	0	-4.69084131	2	2
596	f	some college	48	y	M	crosswords	crosswords.y	59	16.60747306	12	91.65967918	-328.698	99.4334518	-352	120.8211365	5	90.43034386	5	90.01558593	13	107.6954863	4	84.66554136	96.11893126	11	88.54321663	-294.287	102.330897	-393	108.3012051	5	90.43034386	5	90.01558593	9	90.06668352	6	109.1710722	94.8118436	-3.116462554	2.897445195	-12.51993144	0	0	-17.6288028	24.50553087	-1.307087663	3	2
597	m	hs grad or less	69	o	O	crosswords	crosswords.o	60	26.61818444	17	106.9689563	-357.848	96.99137146	-541	78.31472693	9	103.2905327	6	102.2366507	13	107.6954863	6	109.1710722	100.9172669	14	97.84621295	-334.251	99.02299158	-474	89.17176197	12	112.8487574	4	78.64839376	13	107.6954863	5	97.01798159	95.53400272	-9.122743327	2.031620113	10.85703504	9.558224734	-23.58825693	0	-12.15309064	-5.383264217	4	3
598	f	advanced degree	48	y	M	crosswords	crosswords.y	60	19.32830222	11	88.54321663	-155.402	115.9571997	-518	81.86102104	12	112.8487574	6	102.2366507	10	93.4066386	4	84.66554136	94.92642021	13	94.8395275	-552.72	83.59608053	-483	87.46044138	11	109.6062241	7	114.8036483	12	102.1387281	5	97.01798159	97.25327203	6.296310865	-32.36111913	5.599420332	-3.242533378	12.56699756	8.732089463	12.35244023	2.326851826	3	3
599	m	hs grad or less	39	y	Y	crosswords	crosswords.y	51	14.175165	12	91.65967918	-535.45	84.39920131	-410	103.5889406	4	87.02169153	6	102.2366507	8	87.11355617	5	97.01798159	88.25171485	15	100.8687377	-252.907	105.9185238	-482	87.6810564	8	100.0782549	7	114.8036483	10	93.4066386	5	97.01798159	99.83976155	9.209058542	21.5193225	-15.90788417	13.05656332	12.56699756	6.293082423	0	11.5880467	1	1
601	f	bachelors degree	43	y	M	lumosity	lumosity.y	54	10.99798014	17	106.9689563	-209.268	109.5605231	-506	83.49405805	14	119.1220614	7	114.8036483	13	107.6954863	6	109.1710722	112.2200132	18	109.8684494	-98.626	124.3124216	-474	89.17176197	8	100.0782549	5	90.01558593	8	87.11355617	5	97.01798159	99.2879894	2.899493105	14.75189851	5.677703921	-19.0438065	-24.78806232	-20.58193014	-12.15309064	-12.93202376	4	3
602	f	advanced degree	49	y	M	lumosity	lumosity.y	51	11.37273431	10	85.57372703	-681.868	75.81148404	-556	76.43318907	5	90.43034386	5	90.01558593	14	113.8168191	5	97.01798159	82.68504326	8	78.75052699	-537.579	84.1929265	-511	82.72850025	2	80.40665395	6	102.2366507	11	97.4198399	7	121.0680766	86.79261526	-6.823200042	8.381442464	6.295311181	-10.02368991	12.22106476	-16.39697917	24.05009504	4.107571998	2	4
604	f	bachelors degree	58	o	M	crosswords	crosswords.o	54	17.07074278	15	100.8687377	-385.898	94.95403208	-489	86.37006083	6	93.70903787	5	90.01558593	12	102.1387281	6	109.1710722	94.43433595	19	112.8487574	-587.18	81.23365985	-409	103.8964838	11	109.6062241	7	114.8036483	9	90.06668352	6	109.1710722	105.1249047	11.98001971	-13.72037224	17.52642295	15.89718619	24.78806232	-12.07204455	0	10.69056876	2	1
605	m	bachelors degree	42	y	M	crosswords	crosswords.y	67	20.98463806	21	118.4923683	-302.907	101.7141433	-459	92.11688449	8	100.0782549	6	102.2366507	12	102.1387281	6	109.1710722	106.3153843	22	121.4547391	-345.997	98.4582847	-371	114.870504	12	112.8487574	6	102.2366507	14	113.8168191	5	97.01798159	114.5808966	2.962370769	-3.255858645	22.75361946	12.77050259	0	11.678091	-12.15309064	8.265512283	4	2
606	f	bachelors degree	25	y	Y	crosswords	crosswords.y	37	11.20025417	20	115.7229157	-110.016	122.7097698	-415	102.1086165	4	87.02169153	7	114.8036483	2	66.18670658	3	72.32266178	95.20178366	24	127.258891	-249.769	106.3398233	-433	97.65778733	13	116.0032086	6	102.2366507	5	78.88184489	6	109.1710722	109.301696	11.53597528	-16.3699465	-4.450829207	28.98151707	-12.56699756	12.69513831	36.84841046	14.09991235	4	3
607	f	bachelors degree	69	o	O	lumosity	lumosity.o	60	29.15873014	6	71.50566007	-863.874	66.18670658	-501	84.4055999	0	70.89374579	4	78.64839376	2	66.18670658	4	84.66554136	58.90062528	6	71.50566007	-890.357	65.05438457	-519	81.68167022	0	70.89374579	6	102.2366507	1	58.40134056	3	72.32266178	58.73923055	0	-1.132322008	-2.72392968	0	23.58825693	-7.785366016	-12.34287958	-0.161394732	4	4
608	f	bachelors degree	57	o	M	lumosity	lumosity.o	60	16.29181569	11	88.54321663	-271.677	104.1862985	-443	95.50283079	5	90.43034386	5	90.01558593	8	87.11355617	5	97.01798159	88.19084987	13	94.8395275	-372.944	95.94527137	-446	94.76830456	7	96.91529003	5	90.01558593	13	107.6954863	5	97.01798159	94.42235832	6.296310865	-8.24102708	-0.734526226	6.484946169	0	20.58193014	0	6.231508445	1	2
609	f	bachelors degree	54	o	M	lumosity	lumosity.o	38	8.396949028	18	109.8684494	-171.726	113.7429451	-407	104.3725965	11	109.6062241	6	102.2366507	13	107.6954863	7	121.0680766	116.5264382	19	112.8487574	-307.241	101.2049233	-425	99.46328321	12	112.8487574	7	114.8036483	16	127.595966	8	133.0119868	125.0630564	2.980308053	-12.5380218	-4.909313301	3.242533378	12.56699756	19.90047966	11.94391021	8.536618117	3	2
610	m	hs grad or less	18	y	Y	lumosity	lumosity.y	56	20.77606139	12	91.65967918	-134.107	119.206344	-394	107.9902732	11	109.6062241	6	102.2366507	9	90.06668352	5	97.01798159	104.0972607	18	109.8684494	-256.175	105.6415827	-332	127.6365504	11	109.6062241	7	114.8036483	8	87.11355617	7	121.0680766	118.2556507	18.2087702	-13.56476129	19.64627724	0	12.56699756	-2.953127341	24.05009504	14.15839001	1	3
611	f	hs grad or less	53	o	M	lumosity	lumosity.o	58	10.63087486	15	100.8687377	-271.795	104.0431346	-394	107.9902732	9	103.2905327	4	78.64839376	9	90.06668352	5	97.01798159	95.48333847	18	109.8684494	-327.966	99.4931125	-406	104.6415947	5	90.43034386	6	102.2366507	9	90.06668352	4	84.66554136	95.34667643	8.99971166	-4.550022141	-3.348678508	-12.86018885	23.58825693	0	-12.35244023	-0.136662038	4	4
612	f	advanced degree	61	o	M	lumosity	lumosity.o	68	118.3461897	12	91.65967918	-648.43	77.53340682	-533	79.43937075	7	96.91529003	5	90.01558593	11	97.4198399	4	84.66554136	79.8969106	12	91.65967918	-477.944	88.66753535	-418	101.2497901	1	77.29023023	5	90.01558593	13	107.6954863	6	109.1710722	91.48951581	0	11.13412853	21.81041937	-19.62505979	0	10.27564642	24.50553087	11.59260521	1	1
613	f	bachelors degree	29	y	Y	crosswords	crosswords.y	67	19.10598833	28	139.4590829	-252.621	106.1164189	-414	102.4290109	16	125.4160785	7	114.8036483	14	113.8168191	8	133.0119868	132.9701352	28	139.4590829	-101.001	123.7738898	-455	92.86039548	18	131.5085227	6	102.2366507	13	107.6954863	6	109.1710722	126.4981927	0	17.65747092	-9.568615432	6.092444117	-12.56699756	-6.121332753	-23.8409146	-6.471942503	1	3
614	f	advanced degree	29	y	Y	lumosity	lumosity.y	62	86.36148764	18	109.8684494	-61.281	132.9285386	-365	116.9642084	6	93.70903787	7	114.8036483	17	137.1423714	7	121.0680766	131.2102608	18	109.8684494	-46.462	140.085246	-386	110.2934782	12	112.8487574	8	127.5555825	15	120.1949445	6	109.1710722	132.2198464	0	7.156707393	-6.670730209	19.13971957	12.75193428	-16.94742694	-11.89700439	1.009585586	4	4
615	m	advanced degree	25	y	Y	lumosity	lumosity.y	55	9.883120556	6	71.50566007	-249.769	106.3398233	-554	76.59819309	3	83.61639412	5	90.01558593	12	102.1387281	5	97.01798159	82.28720218	8	78.75052699	-256.134	105.6936104	-400	106.1123696	2	80.40665395	6	102.2366507	11	97.4198399	5	97.01798159	91.87196646	7.244866913	-0.646212894	29.51417656	-3.209740174	12.22106476	-4.718888164	0	9.584764273	1	3
616	f	bachelors degree	45	y	M	lumosity	lumosity.y	55	13.73619139	22	121.4547391	-302.907	101.7141433	-396	107.3069857	9	103.2905327	5	90.01558593	13	107.6954863	6	109.1710722	109.9472407	23	124.4099523	-303.001	101.5154947	-365	116.9642084	6	93.70903787	6	102.2366507	12	102.1387281	5	97.01798159	109.3921935	2.955213248	-0.198648671	9.657222655	-9.581494836	12.22106476	-5.556758251	-12.15309064	-0.555047217	4	4
617	m	bachelors degree	27	y	Y	crosswords	crosswords.y	47	11.73037056	20	115.7229157	-252.416	106.2137347	-457	92.49939293	14	119.1220614	7	114.8036483	14	113.8168191	4	84.66554136	111.2879002	14	97.84621295	-173.992	113.1470924	-482	87.6810564	17	128.2711147	7	114.8036483	12	102.1387281	5	97.01798159	110.0263075	-17.87670277	6.933357688	-4.818336537	9.149053358	0	-11.678091	12.35244023	-1.261592718	1	4
618	f	some college	28	y	Y	lumosity	lumosity.y	43	11.73948889	15	100.8687377	-305.02	101.4593231	-514	82.34692675	9	103.2905327	6	102.2366507	6	81.96893327	5	97.01798159	92.20232166	10	85.57372703	-316.51	100.4509629	-461	91.72050148	7	96.91529003	7	114.8036483	12	102.1387281	4	84.66554136	94.15793281	-15.2950107	-1.008360179	9.373574727	-6.375242681	12.56699756	20.16979479	-12.35244023	1.95561115	3	4
619	f	some college	21	y	Y	lumosity	lumosity.y	11	2.332467917	18	109.8684494	-420.158	92.41058533	-418	101.2497901	8	100.0782549	7	114.8036483	13	107.6954863	6	109.1710722	108.6201408	21	118.4923683	-189.556	111.7280398	-546	77.61316791	12	112.8487574	7	114.8036483	13	107.6954863	5	97.01798159	109.8591977	8.6239189	19.31745446	-23.63662221	12.77050259	0	0	-12.15309064	1.239056948	NA	4
620	f	advanced degree	29	y	Y	crosswords	crosswords.y	58	21.48606972	12	91.65967918	-352.548	97.67664605	-475	88.98718796	5	90.43034386	5	90.01558593	16	127.595966	4	84.66554136	92.78518517	14	97.84621295	-274.828	103.7079275	-357	119.1978885	8	100.0782549	5	90.01558593	14	113.8168191	6	109.1710722	108.2491384	6.18653377	6.031281461	30.2107005	9.647910998	0	-13.77914691	24.50553087	15.46395324	3	4
621	m	bachelors degree	57	o	M	crosswords	crosswords.o	51	12.14964028	13	94.8395275	-475.341	88.82553694	-641	67.43489126	8	100.0782549	5	90.01558593	8	87.11355617	4	84.66554136	79.06104034	13	94.8395275	-504.045	86.38131889	-590	72.05241857	8	100.0782549	6	102.2366507	13	107.6954863	5	97.01798159	90.14080227	0	-2.444218047	4.617527309	0	12.22106476	20.58193014	12.35244023	11.07976193	4	2
622	m	some college	22	y	Y	crosswords	crosswords.y	68	17.39267889	9	82.29468311	-192.333	111.5969615	-515	82.2422238	0	70.89374579	6	102.2366507	5	78.88184489	5	97.01798159	81.65808292	13	94.8395275	-176.823	113.0054202	-434	97.43874756	4	87.02169153	6	102.2366507	4	75.15990345	5	97.01798159	91.69010741	12.54484439	1.40845874	15.19652376	16.12794574	0	-3.721941439	0	10.03202449	1	2
623	f	advanced degree	40	y	M	lumosity	lumosity.y	63	12.10888806	18	109.8684494	-295.874	102.1839115	-376	113.3618283	9	103.2905327	7	114.8036483	13	107.6954863	6	109.1710722	114.4915027	19	112.8487574	-353.143	97.57853995	-433	97.65778733	11	109.6062241	7	114.8036483	9	90.06668352	5	97.01798159	104.598613	2.980308053	-4.605371597	-15.70404099	6.315691356	0	-17.6288028	-12.15309064	-9.892889701	4	4
624	m	advanced degree	36	y	Y	lumosity	lumosity.y	29	32.46948486	15	100.8687377	-227.133	108.0117536	-288	145.2125941	8	100.0782549	6	102.2366507	13	107.6954863	5	97.01798159	114.6467826	9	82.29468311	-186.398	112.2616031	-345	123.1166272	4	87.02169153	5	90.01558593	10	93.4066386	5	97.01798159	96.24595073	-18.57405462	4.249849482	-22.09596696	-13.05656332	-12.22106476	-14.28884771	0	-18.40083191	4	5
625	m	bachelors degree	23	y	Y	lumosity	lumosity.y	13	2.0935	11	88.54321663	-189.432	111.8294817	-399	106.4132415	5	90.43034386	4	78.64839376	7	84.57097827	4	84.66554136	86.37569082	11	88.54321663	-356.547	97.45009021	-319	131.9626445	0	70.89374579	6	102.2366507	10	93.4066386	7	121.0680766	101.1451176	0	-14.37939148	25.54940299	-19.53659806	23.58825693	8.835660325	36.40253527	14.76942676	2	2
626	f	NA	49	y	M	crosswords	crosswords.y	20	6.065209167	8	78.75052699	-315.17	100.585194	-533	79.43937075	0	70.89374579	6	102.2366507	10	93.4066386	4	84.66554136	78.40965311	9	82.29468311	-282.182	103.2714496	-503	84.04936081	1	77.29023023	6	102.2366507	13	107.6954863	3	72.32266178	82.7067899	3.544156124	2.686255633	4.609990054	6.396484438	0	14.28884771	-12.34287958	4.297136783	2	1
627	m	some college	23	y	Y	lumosity	lumosity.y	28	8.002282778	19	112.8487574	-154.501	116.3565677	-431	98.13198035	16	125.4160785	7	114.8036483	14	113.8168191	5	97.01798159	118.9387339	22	121.4547391	-340.338	98.77638352	-376	113.3618283	15	122.4665932	7	114.8036483	16	127.595966	6	109.1710722	126.7502602	8.605981616	-17.58018421	15.22984797	-2.949485361	0	13.77914691	12.15309064	7.811526223	1	3
628	f	bachelors degree	60	o	M	crosswords	crosswords.o	53	13.20502083	17	106.9689563	-271.677	104.1862985	-387	109.9797641	6	93.70903787	5	90.01558593	9	90.06668352	3	72.32266178	91.78984645	18	109.8684494	-123.177	119.5322891	-437	96.84674887	5	90.43034386	6	102.2366507	7	84.57097827	5	97.01798159	99.98882078	2.899493105	15.34599068	-13.13301518	-3.278694015	12.22106476	-5.495705243	24.69531981	8.19897434	4	5
629	f	advanced degree	55	o	M	lumosity	lumosity.o	50	12.71623722	17	106.9689563	-447.592	90.1823884	-427	99.01925723	0	70.89374579	7	114.8036483	15	120.1949445	4	84.66554136	96.57955909	17	106.9689563	-383.797	95.23706856	-400	106.1123696	4	87.02169153	7	114.8036483	14	113.8168191	4	84.66554136	101.8867982	0	5.054680154	7.09311242	16.12794574	0	-6.378125399	0	5.307239095	1	3
630	m	hs grad or less	25	y	Y	lumosity	lumosity.y	57	65.15085917	15	100.8687377	-545.359	83.90431888	-417	101.5417153	1	77.29023023	5	90.01558593	12	102.1387281	5	97.01798159	88.18068681	9	82.29468311	-123.177	119.5322891	-365	116.9642084	9	103.2905327	5	90.01558593	12	102.1387281	4	84.66554136	99.64595868	-18.57405462	35.62797025	15.42249309	26.00030248	0	0	-12.35244023	11.46527187	4	3
632	m	advanced degree	38	y	Y	crosswords	crosswords.y	66	20.27326361	26	132.9285386	-236.579	106.6632072	-384	110.9835584	18	131.5085227	8	127.5555825	12	102.1387281	7	121.0680766	132.4868856	25	129.8784281	-232.029	107.0812315	-370	115.2217812	17	128.2711147	8	127.5555825	10	93.4066386	8	133.0119868	132.6841302	-3.050110484	0.418024381	4.238222842	-3.237407947	0	-8.732089463	11.94391021	0.197244609	4	4
633	f	advanced degree	79	o	O	crosswords	crosswords.o	68	28.72254361	9	82.29468311	-780.837	70.46581957	-518	81.86102104	8	100.0782549	5	90.01558593	3	70.96685372	4	84.66554136	72.34308123	12	91.65967918	-503.418	86.54370761	-438	96.65600612	6	93.70903787	0	61.31611067	9	90.06668352	5	97.01798159	79.77735085	9.364996075	16.07788804	14.79498508	-6.369216984	-28.69947526	19.0998298	12.35244023	7.434269618	3	2
634	m	bachelors degree	63	o	M	crosswords	crosswords.o	67	37.74115056	14	97.84621295	-398.85	93.98871705	-448	94.35441755	7	96.91529003	5	90.01558593	12	102.1387281	5	97.01798159	93.14292989	13	94.8395275	-264.848	104.645504	-396	107.3069857	13	116.0032086	6	102.2366507	14	113.8168191	5	97.01798159	108.7832845	-3.006685458	10.65678696	12.95256819	19.08791858	12.22106476	11.678091	0	15.64035458	1	3
635	m	hs grad or less	47	y	M	crosswords	crosswords.y	60	15.36502028	17	106.9689563	-277.7	103.5582712	-421	100.3950446	14	119.1220614	5	90.01558593	14	113.8168191	4	84.66554136	104.2987745	19	112.8487574	-406.78	93.59900549	-339	125.2148302	16	125.4160785	5	90.01558593	5	78.88184489	5	97.01798159	105.5058289	5.879801159	-9.959265696	24.81978558	6.294017188	0	-34.93497417	12.35244023	1.207054423	1	2
637	f	advanced degree	25	y	Y	crosswords	crosswords.y	34	8.651955834	13	94.8395275	-161.009	114.9928228	-389	109.3559537	12	112.8487574	7	114.8036483	13	107.6954863	6	109.1710722	115.3470318	15	100.8687377	-118.693	121.0680766	-404	105.1012089	14	119.1220614	7	114.8036483	12	102.1387281	7	121.0680766	120.3715863	6.02921023	6.075253867	-4.254744793	6.273303911	0	-5.556758251	11.89700439	5.024554535	1	2
638	m	bachelors degree	25	y	Y	lumosity	lumosity.y	60	17.18693446	14	97.84621295	-260.226	105.4580238	-412	103.0124308	3	83.61639412	7	114.8036483	13	107.6954863	5	97.01798159	102.1311994	17	106.9689563	-139.313	118.7094231	-361	118.2244304	11	109.6062241	5	90.01558593	14	113.8168191	6	109.1710722	115.9834721	9.122743327	13.25139935	15.21199964	25.98982994	-24.78806232	6.121332753	12.15309064	13.85227269	2	4
639	f	advanced degree	33	y	Y	lumosity	lumosity.y	45	11.71806597	22	121.4547391	-231.779	107.1855449	-349	121.8885759	14	119.1220614	6	102.2366507	11	97.4198399	6	109.1710722	118.9718557	14	97.84621295	-393.459	94.31039417	-418	101.2497901	14	119.1220614	7	114.8036483	13	107.6954863	7	121.0680766	113.3507497	-23.6085261	-12.87515075	-20.63878581	0	12.56699756	10.27564642	11.89700439	-5.621105933	4	4
640	f	some college	20	y	Y	crosswords	crosswords.y	23	7.582899167	26	132.9285386	-261.277	105.2079414	-368	115.9178826	9	103.2905327	6	102.2366507	15	120.1949445	6	109.1710722	121.5903469	26	132.9285386	-217.51	109.1665804	-426	99.23202524	12	112.8487574	6	102.2366507	15	120.1949445	6	109.1710722	120.733605	0	3.95863897	-16.68585732	9.558224734	0	0	0	-0.85674184	3	4
641	f	advanced degree	64	o	M	lumosity	lumosity.o	66	26.42929444	12	91.65967918	-583.756	81.57120561	-553	76.77277934	2	80.40665395	5	90.01558593	5	78.88184489	5	97.01798159	75.44890209	16	103.9697618	-482.726	88.35776591	-460	91.91078039	0	70.89374579	5	90.01558593	4	75.15990345	4	84.66554136	77.3370101	12.31008259	6.786560301	15.13800105	-9.512908155	0	-3.721941439	-12.35244023	1.888108004	4	4
642	f	bachelors degree	25	y	Y	lumosity	lumosity.y	56	14.07597958	17	106.9689563	-633.829	78.04638052	-422	100.1304258	10	106.4827223	6	102.2366507	12	102.1387281	6	109.1710722	101.0442362	17	106.9689563	-346.854	98.34210698	-320	131.4077174	7	96.91529003	8	127.5555825	14	113.8168191	6	109.1710722	120.3715863	0	20.29572645	31.27729159	-9.567432261	25.31893183	11.678091	0	19.32735017	3	4
643	f	bachelors degree	57	o	M	crosswords	crosswords.o	48	14.06123417	14	97.84621295	-282.182	103.2714496	-454	93.12637837	14	119.1220614	5	90.01558593	10	93.4066386	5	97.01798159	98.34960524	14	97.84621295	-356.547	97.45009021	-416	101.8154552	10	106.4827223	5	90.01558593	4	75.15990345	5	97.01798159	91.49826864	0	-5.821359384	8.689076866	-12.63933906	0	-18.24673514	0	-6.851336599	1	2
644	f	advanced degree	51	o	M	lumosity	lumosity.o	66	31.94757764	20	115.7229157	-320.833	100.2608615	-435	97.25327203	11	109.6062241	7	114.8036483	13	107.6954863	5	97.01798159	110.2557849	20	115.7229157	-198.748	110.6069755	-397	107.0063377	14	119.1220614	7	114.8036483	14	113.8168191	5	97.01798159	118.7989858	0	10.34611401	9.753065661	9.515837288	0	6.121332753	0	8.5432009	2	5
645	m	NA	62	o	M	lumosity	lumosity.o	65	18.51866359	13	94.8395275	-662.79	77.13664955	-483	87.46044138	8	100.0782549	5	90.01558593	11	97.4198399	5	97.01798159	86.14897201	13	94.8395275	-581.489	81.89966869	-453	93.3614607	10	106.4827223	6	102.2366507	8	87.11355617	4	84.66554136	87.6810564	0	4.76301914	5.901019327	6.404467432	12.22106476	-10.30628372	-12.35244023	1.532084387	4	4
646	f	advanced degree	57	o	M	crosswords	crosswords.o	59	20.02434889	14	97.84621295	-536.439	84.25770723	-360	118.4923683	12	112.8487574	5	90.01558593	9	90.06668352	5	97.01798159	97.49166749	14	97.84621295	-252.621	106.1164189	-401	105.8259904	12	112.8487574	6	102.2366507	6	81.96893327	6	109.1710722	103.7232975	0	21.85871164	-12.66637784	0	12.22106476	-8.097750249	12.15309064	6.231630024	4	4
647	f	advanced degree	29	y	Y	lumosity	lumosity.y	20	14.05762889	16	103.9697618	-299.079	101.9769769	-361	118.2244304	9	103.2905327	6	102.2366507	12	102.1387281	6	109.1710722	110.0309672	19	112.8487574	-384.842	94.98950798	-355	119.7341376	17	128.2711147	6	102.2366507	13	107.6954863	6	109.1710722	118.1622255	8.878995662	-6.987468887	1.509707216	24.980582	0	5.556758251	0	8.131258301	3	3
648	f	advanced degree	24	y	Y	crosswords	crosswords.y	21	8.905865834	19	112.8487574	-296.854	102.11238	-430	98.36085186	6	93.70903787	7	114.8036483	14	113.8168191	5	97.01798159	107.9602282	16	103.9697618	-577.63	82.15934615	-513	82.48766262	6	93.70903787	6	102.2366507	11	97.4198399	4	84.66554136	86.74863192	-8.878995662	-19.95303386	-15.87318924	0	-12.56699756	-16.39697917	-12.35244023	-21.21159623	1	5
649	m	hs grad or less	59	o	M	lumosity	lumosity.o	46	14.01496787	11	88.54321663	-509.644	85.93640305	-362	117.9088702	7	96.91529003	4	78.64839376	4	75.15990345	5	97.01798159	85.24478995	14	97.84621295	-782.524	70.30887745	-318	132.4095361	4	87.02169153	3	69.29136417	10	93.4066386	4	84.66554136	84.12132548	9.302996324	-15.62752561	14.50066588	-9.893598494	-9.357029587	18.24673514	-12.35244023	-1.123464477	4	4
650	m	advanced degree	40	y	M	lumosity	lumosity.y	22	6.180022917	15	100.8687377	-259.836	105.5696562	-364	117.264271	2	80.40665395	5	90.01558593	9	90.06668352	4	84.66554136	92.11688449	15	100.8687377	-202.199	110.1759008	-359	118.7337831	5	90.43034386	5	90.01558593	6	81.96893327	6	109.1710722	100.1378789	0	4.606244646	1.469512117	10.02368991	0	-8.097750249	24.50553087	8.020994425	2	4
651	f	some college	24	y	Y	lumosity	lumosity.y	31	6.627776667	11	88.54321663	-184.226	112.7789827	-417	101.5417153	6	93.70903787	6	102.2366507	4	75.15990345	4	84.66554136	89.82878922	14	97.84621295	-361.676	96.78195507	-349	121.8885759	2	80.40665395	6	102.2366507	12	102.1387281	5	97.01798159	99.51921147	9.302996324	-15.99702764	20.34686063	-13.30238392	0	26.97882461	12.35244023	9.69042225	4	4
652	m	advanced degree	40	y	M	crosswords	crosswords.y	52	15.41538139	22	121.4547391	-334.177	99.1163312	-430	98.36085186	9	103.2905327	8	127.5555825	16	127.595966	5	97.01798159	117.9698194	24	127.258891	-504.045	86.38131889	-330	128.4943399	17	128.2711147	7	114.8036483	14	113.8168191	7	121.0680766	129.4569064	5.804151954	-12.73501231	30.13348806	24.980582	-12.75193428	-13.77914691	24.05009504	11.48708704	2	2
653	f	some college	53	o	M	lumosity	lumosity.o	14	3.7911575	9	82.29468311	-604.432	80.39790499	-454	93.12637837	7	96.91529003	4	78.64839376	14	113.8168191	5	97.01798159	85.66223955	13	94.8395275	-227.897	107.3910175	-575	74.08463245	0	70.89374579	5	90.01558593	14	113.8168191	7	121.0680766	93.08910678	12.54484439	26.99311248	-19.04174591	-26.02154423	11.36719217	0	24.05009504	7.426867228	3	1
656	f	some college	24	y	Y	lumosity	lumosity.y	62	17.27256833	18	109.8684494	-221.795	108.6465268	-450	93.96044048	2	80.40665395	5	90.01558593	5	78.88184489	4	84.66554136	86.71005283	15	100.8687377	-161.009	114.9928228	-574	74.19989094	0	70.89374579	6	102.2366507	11	97.4198399	4	84.66554136	86.41504713	-8.99971166	6.346295919	-19.76054954	-9.512908155	12.22106476	18.537995	0	-0.295005704	2	1
657	f	advanced degree	48	y	M	lumosity	lumosity.y	56	23.76206917	18	109.8684494	-365.501	96.44939383	-437	96.84674887	11	109.6062241	4	78.64839376	9	90.06668352	4	84.66554136	91.56382299	25	129.8784281	-409.837	93.27092344	-381	111.8447446	10	106.4827223	7	114.8036483	13	107.6954863	5	97.01798159	114.6048226	20.00997872	-3.178470395	14.99799576	-3.123501776	36.15525449	17.6288028	12.35244023	23.04099958	1	1
658	m	bachelors degree	44	y	M	crosswords	crosswords.y	45	13.8451675	17	106.9689563	-371.281	96.02637887	-459	92.11688449	10	106.4827223	6	102.2366507	15	120.1949445	7	121.0680766	110.8960469	16	103.9697618	-377.966	95.59628891	-528	80.07839292	6	93.70903787	5	90.01558593	16	127.595966	7	121.0680766	102.8680801	-2.999194503	-0.430089964	-12.03849157	-12.77368442	-12.22106476	7.40102151	0	-8.027966753	2	2
659	f	advanced degree	19	y	Y	lumosity	lumosity.y	52	10.24142083	16	103.9697618	-146.632	117.2932101	-338	125.4947145	15	122.4665932	5	90.01558593	15	120.1949445	6	109.1710722	121.4858775	20	115.7229157	-369.063	96.21903	-358	118.9387339	3	83.61639412	6	102.2366507	14	113.8168191	4	84.66554136	103.546774	11.75315395	-21.0741801	-6.555980564	-38.85019906	12.22106476	-6.378125399	-24.50553087	-17.93910349	5	4
660	f	NA	25	y	Y	crosswords	crosswords.y	53	24.90126444	9	82.29468311	-338.578	98.88104165	-444	95.25665989	12	112.8487574	6	102.2366507	13	107.6954863	5	97.01798159	98.88851508	9	82.29468311	-209.268	109.5605231	-448	94.35441755	4	87.02169153	3	69.29136417	12	102.1387281	5	97.01798159	85.51443857	0	10.6794814	-0.902242331	-25.82706591	-32.94528652	-5.556758251	0	-13.37407652	4	4
661	f	some college	24	y	Y	lumosity	lumosity.y	45	16.54094764	24	127.258891	-66.897	131.4411616	-416	101.8154552	14	119.1220614	6	102.2366507	15	120.1949445	5	97.01798159	124.188516	26	132.9285386	-38.146	141.5986594	-435	97.25327203	16	125.4160785	7	114.8036483	11	97.4198399	6	109.1710722	129.1062542	5.669647577	10.15749787	-4.562183198	6.294017188	12.56699756	-22.77510457	12.15309064	4.917738245	4	3
662	f	advanced degree	55	o	M	crosswords	crosswords.o	45	10.97567139	16	103.9697618	-447.592	90.1823884	-485	87.0811887	6	93.70903787	6	102.2366507	6	81.96893327	6	109.1710722	92.02260717	19	112.8487574	-533.173	84.62148798	-409	103.8964838	10	106.4827223	5	90.01558593	5	78.88184489	4	84.66554136	90.42577598	8.878995662	-5.560900426	16.81529508	12.77368442	-12.22106476	-3.087088375	-24.50553087	-1.596831186	5	3
663	f	bachelors degree	40	y	M	crosswords	crosswords.y	52	12.48968972	19	112.8487574	-280.738	103.3554553	-387	109.9797641	10	106.4827223	6	102.2366507	8	87.11355617	6	109.1710722	107.5259537	19	112.8487574	-413.265	93.15120252	-401	105.8259904	11	109.6062241	7	114.8036483	10	93.4066386	5	97.01798159	106.5072781	0	-10.20425283	-4.153773603	3.123501776	12.56699756	6.293082423	-12.15309064	-1.018675632	4	4
664	f	advanced degree	23	y	Y	crosswords	crosswords.y	5	2.062371111	3	57.8512193	-334.177	99.1163312	-431	98.13198035	0	70.89374579	5	90.01558593	12	102.1387281	4	84.66554136	76.72321883	7	75.29108861	-315.19	100.495702	-455	92.86039548	6	93.70903787	5	90.01558593	14	113.8168191	6	109.1710722	93.85927646	17.43986931	1.379370843	-5.271584862	22.81529208	0	11.678091	24.50553087	17.13605763	3	3
665	m	bachelors degree	32	y	Y	crosswords	crosswords.y	20	4.676156667	14	97.84621295	-357.241	97.17365544	-364	117.264271	3	83.61639412	4	78.64839376	13	107.6954863	5	97.01798159	94.87904548	11	88.54321663	-721.443	73.81528126	-373	114.2907573	4	87.02169153	6	102.2366507	16	127.595966	5	97.01798159	97.48033015	-9.302996324	-23.35837418	-2.973513692	3.405297409	23.58825693	19.90047966	0	2.601284677	2	3
666	m	bachelors degree	23	y	Y	lumosity	lumosity.y	68	11.60849833	22	121.4547391	-359.96	96.87341151	-371	114.870504	12	112.8487574	5	90.01558593	10	93.4066386	6	109.1710722	109.5422675	18	109.8684494	-192.333	111.5969615	-396	107.3069857	12	112.8487574	7	114.8036483	14	113.8168191	6	109.1710722	119.3853397	-11.58628967	14.72354997	-7.563518212	0	24.78806232	20.41018047	0	9.84307216	1	4
669	f	NA	52	o	M	lumosity	lumosity.o	56	12.51046806	12	91.65967918	-624.81	79.12011294	-425	99.46328321	10	106.4827223	5	90.01558593	4	75.15990345	6	109.1710722	87.79036964	10	85.57372703	-303.001	101.5154947	-434	97.43874756	12	112.8487574	6	102.2366507	13	107.6954863	4	84.66554136	97.86503635	-6.085952157	22.39538173	-2.024535647	6.366035154	12.22106476	32.53558286	-24.50553087	10.0746667	2	2
670	m	some college	29	y	Y	lumosity	lumosity.y	28	5.701457222	18	109.8684494	-249.769	106.3398233	-493	85.69750507	5	90.43034386	6	102.2366507	13	107.6954863	5	97.01798159	99.69441367	25	129.8784281	-76.11	130.6183038	-459	92.11688449	2	80.40665395	6	102.2366507	11	97.4198399	0	59.35814637	97.88761999	20.00997872	24.27848052	6.419379425	-10.02368991	0	-10.27564642	-37.65983522	-1.806793686	1	1
671	m	advanced degree	33	y	Y	lumosity	lumosity.y	53	14.15146347	12	91.65967918	-369.022	96.31127953	-365	116.9642084	0	70.89374579	6	102.2366507	1	58.40134056	6	109.1710722	86.49906882	10	85.57372703	-217.51	109.1665804	-446	94.76830456	7	96.91529003	4	78.64839376	16	127.595966	6	109.1710722	100.2645885	-6.085952157	12.85530088	-22.19590383	26.02154423	-23.58825693	69.19462541	0	13.76551964	2	2
672	f	some college	52	o	M	lumosity	lumosity.o	13	3.139272222	17	106.9689563	-610.61	79.9243206	-415	102.1086165	8	100.0782549	5	90.01558593	9	90.06668352	4	84.66554136	88.45321784	11	88.54321663	-479.649	88.50326827	-414	102.4290109	12	112.8487574	5	90.01558593	5	78.88184489	4	84.66554136	86.56041646	-18.42573965	8.578947667	0.320394374	12.77050259	0	-11.18483862	0	-1.892801378	1	1
673	m	bachelors degree	61	o	M	lumosity	lumosity.o	39	9.565639167	14	97.84621295	-583.752	81.64233283	-480	88.08386544	4	87.02169153	5	90.01558593	14	113.8168191	5	97.01798159	88.94811784	13	94.8395275	-907.079	64.52733815	-541	78.31472693	7	96.91529003	3	69.29136417	9	90.06668352	5	97.01798159	74.05141875	-3.006685458	-17.11499468	-9.769138513	9.893598494	-20.72422176	-23.75013555	0	-14.89669908	1	1
674	f	bachelors degree	28	y	Y	crosswords	crosswords.y	21	6.166939722	9	82.29468311	-269.623	104.4153839	-376	113.3618283	18	131.5085227	7	114.8036483	14	113.8168191	6	109.1710722	116.7192451	8	78.75052699	-392.261	94.40238768	-300	139.2267361	11	109.6062241	6	102.2366507	6	81.96893327	6	109.1710722	103.5927753	-3.544156124	-10.01299626	25.86490774	-21.90229859	-12.56699756	-31.8478858	0	-13.12646977	1	3
675	f	hs grad or less	59	o	M	crosswords	crosswords.o	69	21.95487194	17	106.9689563	-121.573	119.930612	-365	116.9642084	17	128.2711147	6	102.2366507	12	102.1387281	5	97.01798159	117.6233156	15	100.8687377	-346.854	98.34210698	-338	125.4947145	19	134.6704795	6	102.2366507	14	113.8168191	4	84.66554136	114.4618189	-6.100218555	-21.58850507	8.530506098	6.399364818	0	11.678091	-12.35244023	-3.161496711	1	5
676	m	advanced degree	52	o	M	lumosity	lumosity.o	70	14.12695222	16	103.9697618	-285.119	103.0732927	-415	102.1086165	7	96.91529003	5	90.01558593	11	97.4198399	5	97.01798159	97.47655072	19	112.8487574	-604.432	80.39790499	-379	112.4394233	4	87.02169153	5	90.01558593	10	93.4066386	5	97.01798159	93.31210693	8.878995662	-22.67538775	10.3308068	-9.893598494	0	-4.013201299	0	-4.16444379	1	2
677	f	NA	68	o	O	lumosity	lumosity.o	64	16.05110458	11	88.54321663	-513.125	85.71510822	-438	96.65600612	4	87.02169153	3	69.29136417	5	78.88184489	4	84.66554136	74.03476408	7	75.29108861	-402.742	93.77814388	-463	91.33146433	3	83.61639412	6	102.2366507	7	84.57097827	4	84.66554136	79.47744052	-13.25212802	8.063035663	-5.324541793	-3.405297409	32.94528652	5.689133381	0	5.442676437	3	3
678	f	NA	61	o	M	lumosity	lumosity.o	58	30.5477125	12	91.65967918	-118.693	121.0680766	-463	91.33146433	5	90.43034386	5	90.01558593	3	70.96685372	4	84.66554136	85.25687548	11	88.54321663	-227.431	107.7337662	-464	91.15914822	6	93.70903787	6	102.2366507	10	93.4066386	4	84.66554136	90.42577598	-3.116462554	-13.3343104	-0.172316111	3.278694015	12.22106476	22.43978488	0	5.168900499	4	3
679	f	some college	70	o	O	crosswords	crosswords.o	50	13.79931056	13	94.8395275	-615.08	79.61903821	-441	95.98777089	4	87.02169153	0	61.31611067	10	93.4066386	4	84.66554136	75.6180189	14	97.84621295	-457.003	89.62147321	-486	86.90753509	8	100.0782549	5	90.01558593	11	97.4198399	5	97.01798159	89.88031453	3.006685458	10.002435	-9.0802358	13.05656332	28.69947526	4.013201299	12.35244023	14.26229562	1	3
680	f	bachelors degree	24	y	Y	lumosity	lumosity.y	60	44.07577139	18	109.8684494	-120.462	120.6949278	-496	85.25687548	11	109.6062241	4	78.64839376	12	102.1387281	6	109.1710722	103.5966103	18	109.8684494	-171.726	113.7429451	-380	112.1319449	7	96.91529003	7	114.8036483	11	97.4198399	5	97.01798159	110.2040622	0	-6.951982714	26.87506943	-12.69093404	36.15525449	-4.718888164	-12.15309064	6.607451912	4	3
681	f	some college	50	o	M	lumosity	lumosity.o	43	10.16567	8	78.75052699	-527.63	84.95180732	-403	105.3347821	5	90.43034386	5	90.01558593	9	90.06668352	5	97.01798159	84.43755037	14	97.84621295	-361.798	96.72855041	-400	106.1123696	5	90.43034386	5	90.01558593	12	102.1387281	6	109.1710722	98.03805779	19.09568597	11.77674309	0.777587529	0	0	12.07204455	12.15309064	13.60050742	4	4
682	f	bachelors degree	27	y	Y	lumosity	lumosity.y	37	7.194172542	17	106.9689563	-47.359	136.9072026	-422	100.1304258	14	119.1220614	5	90.01558593	11	97.4198399	6	109.1710722	114.4321917	10	85.57372703	-155.402	115.9571997	-391	108.8231249	12	112.8487574	7	114.8036483	13	107.6954863	6	109.1710722	113.0325745	-21.39522925	-20.95000292	8.692699118	-6.273303911	24.78806232	10.27564642	0	-1.399617135	4	3
683	m	advanced degree	19	y	Y	lumosity	lumosity.y	13	7.240249583	17	106.9689563	-352.808	97.65024282	-324	130.239172	7	96.91529003	7	114.8036483	8	87.11355617	7	121.0680766	112.9945704	12	91.65967918	-333.921	99.1947099	-381	111.8447446	11	109.6062241	7	114.8036483	5	78.88184489	8	133.0119868	109.60165	-15.3092771	1.544467089	-18.39442737	12.69093404	0	-8.231711283	11.94391021	-3.392920474	4	NA
684	f	bachelors degree	33	y	Y	lumosity	lumosity.y	51	13.98350125	16	103.9697618	-76.11	130.6183038	-373	114.2907573	12	112.8487574	5	90.01558593	3	70.96685372	5	97.01798159	104.6181454	17	106.9689563	-260.226	105.4580238	-351	121.0980955	5	90.43034386	7	114.8036483	8	87.11355617	5	97.01798159	105.4580238	2.999194503	-25.16027999	6.807338178	-22.41841358	24.78806232	16.14670246	0	0.839878347	4	4
685	m	some college	54	o	M	lumosity	lumosity.o	50	12.38453413	12	91.65967918	-321.298	100.0409905	-473	89.38345258	11	109.6062241	6	102.2366507	12	102.1387281	5	97.01798159	97.90643602	13	94.8395275	-677.392	76.09434917	-443	95.50283079	10	106.4827223	5	90.01558593	11	97.4198399	5	97.01798159	89.53133618	3.179848312	-23.94664133	6.119378204	-3.123501776	-12.22106476	-4.718888164	0	-8.375099847	3	3
686	m	bachelors degree	24	y	Y	lumosity	lumosity.y	39	8.010922639	11	88.54321663	-249.769	106.3398233	-503	84.04936081	3	83.61639412	7	114.8036483	8	87.11355617	6	109.1710722	93.4394577	15	100.8687377	-470.834	89.2248855	-540	78.4620184	4	87.02169153	7	114.8036483	14	113.8168191	6	109.1710722	98.27835481	12.3255211	-17.11493777	-5.587342407	3.405297409	0	26.70326289	0	4.838897114	3	4
687	f	bachelors degree	23	y	Y	lumosity	lumosity.y	39	10.0708275	17	106.9689563	-334.177	99.1163312	-402	105.565664	13	116.0032086	7	114.8036483	13	107.6954863	7	121.0680766	117.056356	18	109.8684494	-47.359	136.9072026	-385	110.621335	7	96.91529003	8	127.5555825	12	102.1387281	6	109.1710722	122.4551598	2.899493105	37.79087137	5.055670956	-19.08791858	12.75193428	-5.556758251	-11.89700439	5.398803783	3	2
688	f	bachelors degree	40	y	M	lumosity	lumosity.y	41	9.100193472	14	97.84621295	-596.654	80.7682526	-383	111.3076943	9	103.2905327	5	90.01558593	5	78.88184489	3	72.32266178	83.9836183	14	97.84621295	-315.19	100.495702	-342	124.1068203	12	112.8487574	5	90.01558593	12	102.1387281	5	97.01798159	105.8983888	0	19.72744945	12.79912597	9.558224734	0	23.25688317	24.69531981	21.91477052	3	2
689	m	some college	36	y	Y	crosswords	crosswords.y	65	28.93852972	23	124.4099523	-184.97	112.6083954	-403	105.3347821	13	116.0032086	7	114.8036483	13	107.6954863	5	97.01798159	118.7419141	27	136.391296	-221.795	108.6465268	-402	105.565664	11	109.6062241	6	102.2366507	16	127.595966	6	109.1710722	124.2296343	11.98134367	-3.961868534	0.230881926	-6.396984543	-12.56699756	19.90047966	12.15309064	5.487720194	1	3
690	f	advanced degree	25	y	Y	lumosity	lumosity.y	66	31.25063572	20	115.7229157	-91.81	125.526366	-356	119.4715541	14	119.1220614	6	102.2366507	3	70.96685372	6	109.1710722	114.9009908	24	127.258891	-172.743	113.3507497	-331	128.1185036	9	103.2905327	6	102.2366507	7	84.57097827	5	97.01798159	113.2954656	11.53597528	-12.17561626	8.646949516	-15.83152864	0	13.60412456	-12.15309064	-1.605525114	3	3
691	m	some college	41	y	M	lumosity	lumosity.y	30	5.196659444	4	63.24467989	-296.854	102.11238	-406	104.6415947	6	93.70903787	7	114.8036483	12	102.1387281	6	109.1710722	97.33281132	11	88.54321663	-555.775	83.35682848	-408	104.1320842	4	87.02169153	7	114.8036483	15	120.1949445	6	109.1710722	101.5042587	25.29853674	-18.75555154	-0.509510484	-6.687346339	0	18.0562164	0	4.171447356	1	1
692	f	NA	61	o	M	lumosity	lumosity.o	59	19.01108681	10	85.57372703	-292.569	102.4894401	-552	76.91995951	7	96.91529003	3	69.29136417	11	97.4198399	5	97.01798159	81.79893314	15	100.8687377	-327.397	99.61613842	-490	86.22868137	6	93.70903787	6	102.2366507	9	90.06668352	5	97.01798159	92.37668393	15.2950107	-2.873301723	9.308721855	-3.206252155	32.94528652	-7.353156381	0	10.57775079	3	3
693	m	bachelors degree	25	y	Y	lumosity	lumosity.y	11	3.704678652	17	106.9689563	-629.357	78.5556199	-408	104.1320842	10	106.4827223	5	90.01558593	15	120.1949445	6	109.1710722	103.6349728	17	106.9689563	-157.142	115.5944001	-389	109.3559537	12	112.8487574	5	90.01558593	17	137.1423714	5	97.01798159	116.6431715	0	37.0387802	5.223869456	6.366035154	0	16.94742694	-12.15309064	13.00819869	4	3
694	NA	NA	61	o	M	crosswords	crosswords.o	12	5.043319167	7	75.29108861	-504.045	86.38131889	-582	73.19473087	2	80.40665395	5	90.01558593	4	75.15990345	5	97.01798159	71.79464776	10	85.57372703	-552.72	83.59608053	-452	93.53363859	7	96.91529003	5	90.01558593	7	84.57097827	5	97.01798159	83.27381782	10.28263842	-2.785238363	20.33890773	16.50863608	0	9.41107482	0	11.47917006	1	1
695	m	bachelors degree	22	y	Y	lumosity	lumosity.y	51	11.06392278	20	115.7229157	-288.13	102.8187586	-335	126.4275297	12	112.8487574	6	102.2366507	16	127.595966	8	133.0119868	129.6911226	19	112.8487574	-331.264	99.38870045	-381	111.8447446	12	112.8487574	7	114.8036483	15	120.1949445	9	144.874283	128.5397507	-2.874158287	-3.430058183	-14.58278512	0	12.56699756	-7.40102151	11.86229621	-1.151371833	2	4
696	f	some college	47	y	M	crosswords	crosswords.y	42	10.70697806	17	106.9689563	-933.628	63.24467989	-431	98.13198035	8	100.0782549	5	90.01558593	11	97.4198399	6	109.1710722	91.30062057	19	112.8487574	-433.99	91.42377682	-400	106.1123696	10	106.4827223	6	102.2366507	13	107.6954863	5	97.01798159	105.7697744	5.879801159	28.17909693	7.980389302	6.404467432	12.22106476	10.27564642	-12.15309064	14.46915381	5	1
697	f	advanced degree	19	y	Y	crosswords	crosswords.y	5	0.937878611	10	85.57372703	-338.578	98.88104165	-488	86.53255909	4	87.02169153	6	102.2366507	10	93.4066386	5	97.01798159	87.69671255	11	88.54321663	-583.382	81.84552822	-401	105.8259904	8	100.0782549	5	90.01558593	6	81.96893327	5	97.01798159	86.41504713	2.969489603	-17.03551343	19.29343136	13.05656332	-12.22106476	-11.43770533	0	-1.281665422	3	4
698	m	advanced degree	28	y	Y	crosswords	crosswords.y	54	15.84085194	22	121.4547391	-422.46	92.19805583	-423	99.9031128	13	116.0032086	7	114.8036483	12	102.1387281	6	109.1710722	113.234861	18	109.8684494	-98.626	124.3124216	-410	103.5889406	5	90.43034386	7	114.8036483	13	107.6954863	6	109.1710722	114.4618189	-11.58628967	32.11436573	3.685827766	-25.57286475	0	5.556758251	0	1.226957946	4	4
699	m	advanced degree	25	y	Y	lumosity	lumosity.y	63	13.68726125	11	88.54321663	-123.177	119.5322891	-382	111.5668384	9	103.2905327	6	102.2366507	7	84.57097827	4	84.66554136	98.54442096	15	100.8687377	-189.556	111.7280398	-397	107.0063377	8	100.0782549	8	127.5555825	8	87.11355617	6	109.1710722	110.5639551	12.3255211	-7.804249347	-4.560500663	-3.212277852	25.31893183	2.542577902	24.50553087	12.01953419	2	4
700	f	hs grad or less	20	y	Y	crosswords	crosswords.y	60	15.8199225	18	109.8684494	-274.828	103.7079275	-475	88.98718796	10	106.4827223	6	102.2366507	10	93.4066386	4	84.66554136	97.18882658	17	106.9689563	-277.7	103.5582712	-380	112.1319449	14	119.1220614	3	69.29136417	6	81.96893327	6	109.1710722	100.3242225	-2.899493105	-0.149656321	23.14475694	12.63933906	-32.94528652	-11.43770533	24.50553087	3.135395883	4	2
701	m	advanced degree	29	y	Y	crosswords	crosswords.y	58	15.00524167	16	103.9697618	-219.623	108.7832845	-396	107.3069857	12	112.8487574	6	102.2366507	9	90.06668352	6	109.1710722	108.4274486	12	91.65967918	-98.626	124.3124216	-403	105.3347821	11	109.6062241	6	102.2366507	10	93.4066386	7	121.0680766	111.4517955	-12.31008259	15.52913709	-1.97220362	-3.242533378	0	3.339955082	11.89700439	3.024346916	2	4
702	m	advanced degree	71	o	O	crosswords	crosswords.o	50	14.87566917	16	103.9697618	-516.135	85.48470931	-520	81.52355631	4	87.02169153	5	90.01558593	10	93.4066386	5	97.01798159	84.77821875	17	106.9689563	-879.695	65.27542145	-415	102.1086165	8	100.0782549	4	78.64839376	13	107.6954863	5	97.01798159	89.63567109	2.999194503	-20.20928786	20.58506023	13.05656332	-11.36719217	14.28884771	0	4.857452342	4	2
703	f	advanced degree	26	y	Y	crosswords	crosswords.y	9	2.233519445	18	109.8684494	-360.225	96.82388725	-432	97.8951468	14	119.1220614	6	102.2366507	15	120.1949445	6	109.1710722	113.1580388	19	112.8487574	-61.281	132.9285386	-364	117.264271	16	125.4160785	8	127.5555825	15	120.1949445	7	121.0680766	138.6838893	2.980308053	36.10465133	19.36912421	6.294017188	25.31893183	0	11.89700439	25.52585051	2	1
704	f	some college	31	y	Y	crosswords	crosswords.y	58	17.16053222	16	103.9697618	-471.994	89.13788528	-429	98.58185637	10	106.4827223	4	78.64839376	11	97.4198399	6	109.1710722	95.8175758	17	106.9689563	-473.93	89.00669503	-447	94.56585795	8	100.0782549	7	114.8036483	9	90.06668352	5	97.01798159	98.06060608	2.999194503	-0.131190252	-4.015998423	-6.404467432	36.15525449	-7.353156381	-12.15309064	2.243030281	2	3
705	m	some college	58	o	M	lumosity	lumosity.o	34	7.499228889	16	103.9697618	-264.79	104.7237569	-380	112.1319449	13	116.0032086	5	90.01558593	12	102.1387281	5	97.01798159	106.3398233	18	109.8684494	-84.028	128.9367294	-378	112.741526	14	119.1220614	4	78.64839376	12	102.1387281	5	97.01798159	111.5919377	5.898687608	24.2129725	0.609581113	3.118852745	-11.36719217	0	0	5.252114448	2	1
706	m	hs grad or less	24	y	Y	crosswords	crosswords.y	60	9.844039167	11	88.54321663	-479.557	88.6129315	-342	124.1068203	1	77.29023023	6	102.2366507	3	70.96685372	5	97.01798159	87.19957765	12	91.65967918	-604.432	80.39790499	-425	99.46328321	12	112.8487574	6	102.2366507	9	90.06668352	6	109.1710722	96.38421141	3.116462554	-8.215026503	-24.64353707	35.55852721	0	19.0998298	12.15309064	9.184633768	4	5
707	m	hs grad or less	29	y	Y	crosswords	crosswords.y	3	0.975097222	5	67.59046395	-609.19	80.15017566	-485	87.0811887	7	96.91529003	5	90.01558593	9	90.06668352	4	84.66554136	75.47730525	6	71.50566007	-524.448	85.07457541	-402	105.565664	7	96.91529003	5	90.01558593	11	97.4198399	4	84.66554136	83.2460335	3.915196125	4.924399746	18.48447535	0	0	7.353156381	0	7.768728247	2	NA
708	f	some college	23	y	Y	crosswords	crosswords.y	59	9.420118055	9	82.29468311	-483.683	88.25677819	-355	119.7341376	3	83.61639412	7	114.8036483	13	107.6954863	6	109.1710722	101.1563297	6	71.50566007	-323.645	99.93665093	-381	111.8447446	7	96.91529003	7	114.8036483	8	87.11355617	6	109.1710722	97.69927166	-10.78902304	11.67987274	-7.889392983	13.2988959	0	-20.58193014	0	-3.457058082	4	3
709	m	advanced degree	67	o	O	lumosity	lumosity.o	54	11.26567708	17	106.9689563	-308.27	101.0405008	-417	101.5417153	5	90.43034386	6	102.2366507	11	97.4198399	4	84.66554136	96.06496055	18	109.8684494	-313.294	100.8500751	-401	105.8259904	11	109.6062241	6	102.2366507	9	90.06668352	6	109.1710722	106.6796624	2.899493105	-0.190425669	4.284275144	19.17588021	0	-7.353156381	24.50553087	10.61470187	4	4
710	m	some college	31	y	Y	lumosity	lumosity.y	29	6.260541528	25	129.8784281	-91.81	125.526366	-472	89.57882363	18	131.5085227	8	127.5555825	9	90.06668352	6	109.1710722	125.4160785	29	141.9590755	-186.398	112.2616031	-459	92.11688449	18	131.5085227	7	114.8036483	13	107.6954863	6	109.1710722	127.0479074	12.08064741	-13.26476293	2.538060861	0	-12.75193428	17.6288028	0	1.63182883	3	4
711	m	bachelors degree	28	y	Y	lumosity	lumosity.y	51	13.87385625	21	118.4923683	-189.556	111.7280398	-428	98.81002988	15	122.4665932	6	102.2366507	15	120.1949445	7	121.0680766	122.9831414	16	103.9697618	-116.13	121.7917755	-350	121.4651083	11	109.6062241	7	114.8036483	12	102.1387281	7	121.0680766	122.8514513	-14.52260651	10.0637357	22.65507838	-12.86036912	12.56699756	-18.0562164	0	-0.131690107	2	4
712	f	advanced degree	75	o	O	crosswords	crosswords.o	44	34.75739417	6	71.50566007	-555.775	83.35682848	-541	78.31472693	4	87.02169153	4	78.64839376	10	93.4066386	4	84.66554136	71.57329045	8	78.75052699	-409.642	93.2956396	-480	88.08386544	3	83.61639412	5	90.01558593	12	102.1387281	5	97.01798159	83.56215751	7.244866913	9.938811126	9.769138513	-3.405297409	11.36719217	8.732089463	12.35244023	11.98886706	3	3
713	f	bachelors degree	22	y	Y	lumosity	lumosity.y	50	23.23320908	12	91.65967918	-442.709	90.78396411	-357	119.1978885	9	103.2905327	3	69.29136417	12	102.1387281	5	97.01798159	93.39021721	15	100.8687377	-193.626	111.4019867	-387	109.9797641	8	100.0782549	4	78.64839376	12	102.1387281	4	84.66554136	96.85055843	9.209058542	20.61802255	-9.21812441	-3.212277852	9.357029587	0	-12.35244023	3.460341216	3	2
714	m	hs grad or less	56	o	M	lumosity	lumosity.o	62	13.68740847	14	97.84621295	-370.77	96.09195223	-315	133.5809616	6	93.70903787	7	114.8036483	6	81.96893327	4	84.66554136	100.4248669	20	115.7229157	-235.35	106.7661851	-391	108.8231249	6	93.70903787	5	90.01558593	10	93.4066386	5	97.01798159	101.1226952	17.87670277	10.67423289	-24.75783665	0	-24.78806232	11.43770533	12.35244023	0.697828227	4	3
715	m	bachelors degree	39	y	Y	crosswords	crosswords.y	49	19.66857389	16	103.9697618	-306.514	101.3844593	-417	101.5417153	5	90.43034386	5	90.01558593	11	97.4198399	4	84.66554136	92.32151089	16	103.9697618	-182.029	112.8972263	-417	101.5417153	11	109.6062241	6	102.2366507	5	78.88184489	4	84.66554136	98.33835769	0	11.512767	0	19.17588021	12.22106476	-18.537995	0	6.016846797	3	4
716	f	advanced degree	46	y	M	lumosity	lumosity.y	11	3.592974444	11	88.54321663	-288.13	102.8187586	-450	93.96044048	2	80.40665395	5	90.01558593	9	90.06668352	5	97.01798159	85.8610433	12	91.65967918	-327.298	99.76522691	-421	100.3950446	3	83.61639412	6	102.2366507	10	93.4066386	6	109.1710722	95.08790593	3.116462554	-3.053531717	6.434604091	3.209740174	12.22106476	3.339955082	12.15309064	9.226862636	4	4
717	f	some college	48	y	M	crosswords	crosswords.y	61	17.6874925	13	94.8395275	-401.711	93.92809809	-490	86.22868137	7	96.91529003	5	90.01558593	12	102.1387281	4	84.66554136	87.18884801	9	82.29468311	-316.51	100.4509629	-394	107.9902732	7	96.91529003	6	102.2366507	10	93.4066386	5	97.01798159	95.09576859	-12.54484439	6.522864812	21.76159183	0	12.22106476	-8.732089463	12.35244023	7.906920577	2	4
718	f	bachelors degree	35	y	Y	crosswords	crosswords.y	56	12.32273472	18	109.8684494	-84.028	128.9367294	-410	103.5889406	12	112.8487574	6	102.2366507	10	93.4066386	5	97.01798159	111.5067316	21	118.4923683	-91.81	125.526366	-385	110.621335	12	112.8487574	4	78.64839376	9	90.06668352	7	121.0680766	113.7089616	8.6239189	-3.410363381	7.032394434	0	-23.58825693	-3.339955082	24.05009504	2.202230073	2	1
719	f	some college	61	o	M	lumosity	lumosity.o	32	7.350573194	10	85.57372703	-296.854	102.11238	-543	78.02460735	0	70.89374579	6	102.2366507	6	81.96893327	4	84.66554136	77.44146646	14	97.84621295	-231.779	107.1855449	-530	79.8326915	8	100.0782549	6	102.2366507	10	93.4066386	4	84.66554136	91.34907288	12.27248593	5.073164905	1.808084155	29.18450906	0	11.43770533	0	13.90760643	3	4
720	m	advanced degree	24	y	Y	crosswords	crosswords.y	49	13.02179	24	127.258891	-161.009	114.9928228	-367	116.2690585	4	87.02169153	6	102.2366507	11	97.4198399	5	97.01798159	110.2181563	23	124.4099523	-116.13	121.7917755	-375	113.7372763	12	112.8487574	6	102.2366507	9	90.06668352	6	109.1710722	117.9316914	-2.848938706	6.798952728	-2.53178224	25.82706591	0	-7.353156381	12.15309064	7.713535118	4	1
721	m	advanced degree	36	y	Y	crosswords	crosswords.y	59	17.88308944	16	103.9697618	-995.291	61.41883385	-440	96.21518319	9	103.2905327	7	114.8036483	7	84.57097827	5	97.01798159	90.38462504	14	97.84621295	-957.026	61.71659081	-459	92.11688449	14	119.1220614	6	102.2366507	12	102.1387281	5	97.01798159	93.10567718	-6.123548824	0.297756958	-4.098298697	15.83152864	-12.56699756	17.56774979	0	2.721052143	2	4
722	f	advanced degree	46	y	M	crosswords	crosswords.y	0	0	20	115.7229157	-188.541	111.9621709	-397	107.0063377	6	93.70903787	7	114.8036483	7	84.57097827	6	109.1710722	109.0993012	19	112.8487574	-98.626	124.3124216	-416	101.8154552	12	112.8487574	5	90.01558593	5	78.88184489	6	109.1710722	107.252488	-2.874158287	12.35025063	-5.190882463	19.13971957	-24.78806232	-5.689133381	0	-1.846813183	3	4
723	f	advanced degree	57	o	M	crosswords	crosswords.o	67	22.5649025	12	91.65967918	-232.7	106.8736216	-533	79.43937075	15	122.4665932	7	114.8036483	14	113.8168191	4	84.66554136	103.2371133	16	103.9697618	-453.784	89.65931362	-546	77.61316791	14	119.1220614	5	90.01558593	13	107.6954863	5	97.01798159	96.21518319	12.31008259	-17.21430801	-1.826202843	-3.344531828	-24.78806232	-6.121332753	12.35244023	-7.021930114	3	3
724	m	some college	22	y	Y	crosswords	crosswords.y	58	4.506258056	16	103.9697618	-513.125	85.71510822	-354	120.0483363	6	93.70903787	5	90.01558593	14	113.8168191	5	97.01798159	100.8351459	15	100.8687377	-280.5	103.454871	-350	121.4651083	15	122.4665932	6	102.2366507	14	113.8168191	5	97.01798159	114.7250141	-3.101024052	17.73976274	1.41677199	28.75755531	12.22106476	0	0	13.88986821	4	3
725	f	advanced degree	42	y	M	crosswords	crosswords.y	4	0.728869167	21	118.4923683	-345.455	98.54067692	-500	84.58362209	10	106.4827223	7	114.8036483	10	93.4066386	4	84.66554136	100.0819813	21	118.4923683	-184.226	112.7789827	-410	103.5889406	6	93.70903787	5	90.01558593	10	93.4066386	5	97.01798159	101.9920135	0	14.23830579	19.00531848	-12.77368442	-24.78806232	0	12.35244023	1.91003219	4	5
726	m	some college	32	y	Y	lumosity	lumosity.y	61	12.93807069	19	112.8487574	-474.432	88.90897258	-495	85.37121426	9	103.2905327	3	69.29136417	13	107.6954863	6	109.1710722	94.23423795	18	109.8684494	-667.005	76.91995951	-396	107.3069857	10	106.4827223	7	114.8036483	13	107.6954863	6	109.1710722	107.8104777	-2.980308053	-11.98901307	21.93577148	3.19218958	45.51228408	0	0	13.57623978	3	2
727	m	bachelors degree	25	y	Y	crosswords	crosswords.y	2	0.384293056	16	103.9697618	-176.823	113.0054202	-344	123.4396335	12	112.8487574	7	114.8036483	11	97.4198399	6	109.1710722	118.0310667	17	106.9689563	-101.001	123.7738898	-341	124.5226947	9	103.2905327	5	90.01558593	4	75.15990345	4	84.66554136	101.8642643	2.999194503	10.76846956	1.083061271	-9.558224734	-24.78806232	-22.25993644	-24.50553087	-16.16680243	5	4
728	f	some college	22	y	Y	lumosity	lumosity.y	56	11.2039609	18	109.8684494	-345.997	98.4582847	-328	129.2296594	13	116.0032086	6	102.2366507	11	97.4198399	5	97.01798159	112.0648798	20	115.7229157	-290.774	102.6369078	-337	125.7674562	6	93.70903787	7	114.8036483	13	107.6954863	6	109.1710722	116.7539665	5.854466341	4.17862314	-3.462203185	-22.29417074	12.56699756	10.27564642	12.15309064	4.689086689	2	3
729	f	advanced degree	34	y	Y	lumosity	lumosity.y	36	9.1498925	16	103.9697618	-38.146	141.5986594	-407	104.3725965	11	109.6062241	5	90.01558593	16	127.595966	4	84.66554136	114.8522413	12	91.65967918	-255.02	105.7617501	-440	96.21518319	15	122.4665932	6	102.2366507	14	113.8168191	5	97.01798159	107.0104939	-12.31008259	-35.8369093	-8.157413321	12.86036912	12.22106476	-13.77914691	12.35244023	-7.841747451	4	3
730	f	some college	53	o	M	crosswords	crosswords.o	64	20.51362917	22	121.4547391	-476.594	88.7071531	-392	108.5586767	14	119.1220614	6	102.2366507	13	107.6954863	6	109.1710722	113.6243092	19	112.8487574	-497.529	87.0811887	-475	88.98718796	14	119.1220614	6	102.2366507	12	102.1387281	5	97.01798159	102.1199074	-8.605981616	-1.625964399	-19.57148876	0	0	-5.556758251	-12.15309064	-11.50440182	2	3
731	f	advanced degree	34	y	Y	lumosity	lumosity.y	64	13.6683125	18	109.8684494	-378.392	95.53010728	-498	84.92095746	3	83.61639412	6	102.2366507	11	97.4198399	7	121.0680766	98.59682805	19	112.8487574	-277.016	103.6349728	-449	94.14184935	10	106.4827223	5	90.01558593	11	97.4198399	4	84.66554136	97.15468745	2.980308053	8.10486555	9.220891891	22.86632816	-12.22106476	0	-36.40253527	-1.442140601	4	NA
732	m	bachelors degree	50	o	M	crosswords	crosswords.o	54	14.81365417	23	124.4099523	-92.704	124.8254264	-447	94.56585795	7	96.91529003	7	114.8036483	15	120.1949445	5	97.01798159	117.446208	24	127.258891	-341.62	98.70159152	-438	96.65600612	11	109.6062241	6	102.2366507	14	113.8168191	5	97.01798159	110.9494819	2.848938706	-26.1238349	2.090148176	12.69093404	-12.56699756	-6.378125399	0	-6.49672615	5	2
733	f	hs grad or less	34	y	Y	lumosity	lumosity.y	42	16.59264458	6	71.50566007	-306.514	101.3844593	-485	87.0811887	2	80.40665395	6	102.2366507	9	90.06668352	4	84.66554136	79.8785999	8	78.75052699	-406.78	93.59900549	-496	85.25687548	6	93.70903787	5	90.01558593	5	78.88184489	4	84.66554136	77.29023023	7.244866913	-7.785453823	-1.824313217	13.30238392	-12.22106476	-11.18483862	0	-2.588369673	NA	NA
734	f	some college	59	o	M	lumosity	lumosity.o	52	11.87940542	13	94.8395275	-433.99	91.42377682	-503	84.04936081	3	83.61639412	5	90.01558593	12	102.1387281	3	72.32266178	80.11434122	14	97.84621295	-543.336	84.02310063	-526	80.51978898	6	93.70903787	5	90.01558593	8	87.11355617	4	84.66554136	79.9243206	3.006685458	-7.40067619	-3.529571826	10.09264375	0	-15.02517189	12.34287958	-0.190020617	NA	4
735	m	some college	32	y	Y	crosswords	crosswords.y	61	17.05325722	19	112.8487574	-217.51	109.1665804	-367	116.2690585	13	116.0032086	6	102.2366507	17	137.1423714	7	121.0680766	128.0754305	19	112.8487574	-419.007	92.56687967	-344	123.4396335	17	128.2711147	8	127.5555825	16	127.595966	7	121.0680766	132.6045548	0	-16.59970073	7.17057494	12.2679061	25.31893183	-9.546405435	0	4.52912434	2	2
736	m	some college	52	o	M	lumosity	lumosity.o	53	13.90760736	13	94.8395275	-782.524	70.30887745	-413	102.7126304	10	106.4827223	7	114.8036483	9	90.06668352	5	97.01798159	94.13782744	14	97.84621295	-763.467	71.46024928	-387	109.9797641	5	90.43034386	7	114.8036483	13	107.6954863	4	84.66554136	94.31840206	3.006685458	1.151371833	7.267133679	-16.05237843	0	17.6288028	-12.35244023	0.180574622	2	5
737	m	advanced degree	56	o	M	lumosity	lumosity.o	29	7.564312361	21	118.4923683	-687.478	75.53384924	-528	80.07839292	7	96.91529003	4	78.64839376	9	90.06668352	6	109.1710722	87.21030073	18	109.8684494	-721.883	73.79816407	-494	85.51443857	14	119.1220614	5	90.01558593	12	102.1387281	6	109.1710722	97.29115738	-8.6239189	-1.735685175	5.436045645	22.20677133	11.36719217	12.07204455	0	10.08085665	1	1
738	f	advanced degree	65	o	O	lumosity	lumosity.o	57	12.15678361	19	112.8487574	-285.672	102.9136352	-454	93.12637837	16	125.4160785	8	127.5555825	13	107.6954863	5	97.01798159	115.9900478	20	115.7229157	-352.548	97.67664605	-403	105.3347821	12	112.8487574	7	114.8036483	13	107.6954863	5	97.01798159	112.2876447	2.874158287	-5.236989183	12.20840375	-12.5673211	-12.75193428	0	0	-3.702403153	4	3
739	f	NA	30	y	Y	crosswords	crosswords.y	51	16.81501083	21	118.4923683	-295.55	102.2215796	-371	114.870504	4	87.02169153	5	90.01558593	12	102.1387281	5	97.01798159	102.7960052	16	103.9697618	-76.11	130.6183038	-380	112.1319449	4	87.02169153	7	114.8036483	12	102.1387281	5	97.01798159	111.4917337	-14.52260651	28.39672422	-2.738559045	0	24.78806232	0	0	8.695728569	1	3
740	f	advanced degree	54	o	M	lumosity	lumosity.o	66	22.95542514	12	91.65967918	-619.236	79.42028611	-464	91.15914822	6	93.70903787	7	114.8036483	13	107.6954863	5	97.01798159	93.87953147	15	100.8687377	-615.08	79.61903821	-447	94.56585795	4	87.02169153	5	90.01558593	12	102.1387281	5	97.01798159	87.8163011	9.209058542	0.198752101	3.406709728	-6.687346339	-24.78806232	-5.556758251	0	-6.063230377	4	4
741	f	some college	20	y	Y	crosswords	crosswords.y	32	9.897618055	20	115.7229157	-46.462	140.085246	-474	89.17176197	8	100.0782549	7	114.8036483	7	84.57097827	5	97.01798159	110.0963043	18	109.8684494	-406.78	93.59900549	-470	89.9830089	15	122.4665932	5	90.01558593	6	81.96893327	5	97.01798159	96.17670134	-5.854466341	-46.48624049	0.811246925	22.38833832	-24.78806232	-2.602045007	0	-13.91960299	4	2
742	m	hs grad or less	35	y	Y	lumosity	lumosity.y	23	7.18918	10	85.57372703	-85.28	127.8634635	-268	149.3956998	10	106.4827223	5	90.01558593	10	93.4066386	5	97.01798159	111.9724165	4	63.24467989	-221.969	108.4449083	-357	119.1978885	9	103.2905327	6	102.2366507	6	81.96893327	7	121.0680766	99.71304933	-22.32904714	-19.41855523	-30.19781135	-3.19218958	12.22106476	-11.43770533	24.05009504	-12.2593672	1	1
743	f	advanced degree	48	y	M	lumosity	lumosity.y	49	11.52497736	26	132.9285386	-146.632	117.2932101	-425	99.46328321	16	125.4160785	5	90.01558593	14	113.8168191	7	121.0680766	124.5795894	25	129.8784281	-232.029	107.0812315	-401	105.8259904	9	103.2905327	7	114.8036483	17	137.1423714	6	109.1710722	126.6774699	-3.050110484	-10.21197856	6.362707239	-22.12554583	24.78806232	23.32555234	-11.89700439	2.097880547	1	2
744	f	advanced degree	26	y	Y	crosswords	crosswords.y	47	10.35237333	16	103.9697618	-591.527	81.01984944	-491	86.02866905	6	93.70903787	6	102.2366507	9	90.06668352	5	97.01798159	88.53323717	18	109.8684494	-221.795	108.6465268	-490	86.22868137	3	83.61639412	7	114.8036483	15	120.1949445	5	97.01798159	104.8021385	5.898687608	27.6266774	0.200012312	-10.09264375	12.56699756	30.12826095	0	16.26890135	2	1
745	f	bachelors degree	56	o	M	lumosity	lumosity.o	46	9.525335	10	85.57372703	-403.523	93.65202668	-463	91.33146433	8	100.0782549	4	78.64839376	7	84.57097827	4	84.66554136	80.16805048	14	97.84621295	-543.604	83.99679139	-613	69.52982653	6	93.70903787	6	102.2366507	9	90.06668352	4	84.66554136	80.83587294	12.27248593	-9.655235282	-21.8016378	-6.369216984	23.58825693	5.495705243	0	0.667822465	3	4
746	m	hs grad or less	43	y	M	lumosity	lumosity.y	26	5.314468889	16	103.9697618	-420.794	92.33425233	-471	89.77714362	8	100.0782549	5	90.01558593	5	78.88184489	6	109.1710722	91.10589336	14	97.84621295	-383.92	95.18609297	-439	96.43789596	6	93.70903787	5	90.01558593	5	78.88184489	5	97.01798159	87.24778018	-6.123548824	2.851840637	6.660752334	-6.369216984	0	0	-12.15309064	-3.858113176	4	3
747	m	some college	30	y	Y	lumosity	lumosity.y	38	8.195139861	22	121.4547391	-579.856	82.00724801	-433	97.65778733	13	116.0032086	6	102.2366507	13	107.6954863	5	97.01798159	105.830009	20	115.7229157	-120.493	120.3248281	-431	98.13198035	7	96.91529003	7	114.8036483	16	127.595966	0	59.35814637	108.0160516	-5.731823328	38.31758005	0.474193011	-19.08791858	12.56699756	19.90047966	-37.65983522	2.186042625	4	3
748	f	some college	47	y	M	lumosity	lumosity.y	53	10.17778056	22	121.4547391	-315.17	100.585194	-436	97.04838168	7	96.91529003	6	102.2366507	8	87.11355617	4	84.66554136	97.37066069	22	121.4547391	-172.714	113.5568984	-380	112.1319449	4	87.02169153	6	102.2366507	13	107.6954863	6	109.1710722	112.6774987	0	12.97170443	15.08356323	-9.893598494	0	20.58193014	24.50553087	15.30683799	5	4
749	m	bachelors degree	24	y	Y	crosswords	crosswords.y	45	14.05359194	17	106.9689563	-353.143	97.57853995	-420	100.6933581	13	116.0032086	6	102.2366507	14	113.8168191	5	97.01798159	108.4012805	21	118.4923683	-271.844	103.8502509	-473	89.38345258	8	100.0782549	7	114.8036483	12	102.1387281	8	133.0119868	114.8340007	11.52341201	6.271710974	-11.30990554	-15.92495375	12.56699756	-11.678091	35.99400524	6.432720129	2	1
750	f	advanced degree	66	o	O	lumosity	lumosity.o	56	11.86858319	14	97.84621295	-391.296	94.52604736	-654	66.41903842	9	103.2905327	4	78.64839376	11	97.4198399	5	97.01798159	84.16693151	14	97.84621295	-351.188	98.00422702	-450	93.96044048	7	96.91529003	4	78.64839376	9	90.06668352	3	72.32266178	82.42859391	0	3.478179664	27.54140206	-6.375242681	0	-7.353156381	-24.69531981	-1.738337592	3	4
751	f	some college	71	o	O	lumosity	lumosity.o	53	10.4091825	6	71.50566007	-503.015	86.68244243	-605	70.41386478	11	109.6062241	4	78.64839376	2	66.18670658	4	84.66554136	69.23051831	9	82.29468311	-734.527	73.139359	-497	85.11121134	11	109.6062241	4	78.64839376	7	84.57097827	4	84.66554136	75.98759642	10.78902304	-13.54308343	14.69734656	0	0	18.38427169	0	6.757078112	4	2
752	m	advanced degree	53	o	M	lumosity	lumosity.o	53	10.44973361	17	106.9689563	-138.833	118.9801506	-423	99.9031128	5	90.43034386	5	90.01558593	11	97.4198399	4	84.66554136	96.98376683	17	106.9689563	-201.849	110.3123492	-390	109.1082611	5	90.43034386	6	102.2366507	11	97.4198399	6	109.1710722	106.2462313	0	-8.667801361	9.205148337	0	12.22106476	0	24.50553087	9.262464492	3	4
753	f	some college	41	y	M	lumosity	lumosity.y	17	3.376435278	15	100.8687377	-334.177	99.1163312	-500	84.58362209	10	106.4827223	4	78.64839376	10	93.4066386	5	97.01798159	90.11766609	13	94.8395275	-290.774	102.6369078	-344	123.4396335	9	103.2905327	6	102.2366507	11	97.4198399	5	97.01798159	104.8885101	-6.02921023	3.520576633	38.85601139	-3.19218958	23.58825693	4.013201299	0	14.77084405	2	4
754	f	some college	46	y	M	lumosity	lumosity.y	31	7.083245694	12	91.65967918	-151.86	116.747015	-392	108.5586767	3	83.61639412	5	90.01558593	10	93.4066386	5	97.01798159	95.24098747	10	85.57372703	-352.224	97.77088515	-411	103.29435	7	96.91529003	6	102.2366507	11	97.4198399	6	109.1710722	98.01550507	-6.085952157	-18.97612988	-5.264326754	13.2988959	12.22106476	4.013201299	12.15309064	2.774517594	2	4
756	m	advanced degree	48	y	M	lumosity	lumosity.y	55	13.62411498	14	97.84621295	-161.009	114.9928228	-567	75.14520953	4	87.02169153	6	102.2366507	13	107.6954863	4	84.66554136	92.34698824	12	91.65967918	-349.128	98.1357357	-469	90.19161952	6	93.70903787	5	90.01558593	13	107.6954863	6	109.1710722	95.15076961	-6.18653377	-16.85708706	15.04640998	6.687346339	-12.22106476	0	24.50553087	2.803781375	4	3
757	f	advanced degree	57	o	M	lumosity	lumosity.o	49	10.57250958	17	106.9689563	-252.621	106.1164189	-557	76.27830469	12	112.8487574	4	78.64839376	14	113.8168191	6	109.1710722	100.7232026	15	100.8687377	-202.24	110.0356278	-544	77.83763691	11	109.6062241	6	102.2366507	12	102.1387281	6	109.1710722	102.8604902	-6.100218555	3.919208913	1.559332213	-3.242533378	23.58825693	-11.678091	0	2.137287604	2	1
758	m	some college	52	o	M	lumosity	lumosity.o	68	14.55995972	12	91.65967918	-141.426	118.4287944	-441	95.98777089	8	100.0782549	6	102.2366507	9	90.06668352	7	121.0680766	104.5947075	15	100.8687377	-101.001	123.7738898	-413	102.7126304	7	96.91529003	7	114.8036483	11	97.4198399	5	97.01798159	108.1539398	9.209058542	5.345095397	6.724859485	-3.162964829	12.56699756	7.353156381	-24.05009504	3.559232273	5	4
759	f	some college	23	y	Y	crosswords	crosswords.y	38	9.319427778	9	82.29468311	-192.333	111.5969615	-599	71.13480652	12	112.8487574	5	90.01558593	15	120.1949445	5	97.01798159	96.24210566	14	97.84621295	-153.546	116.5401196	-435	97.25327203	13	116.0032086	5	90.01558593	16	127.595966	5	97.01798159	110.2228564	15.55152985	4.943158113	26.11846551	3.154451166	0	7.40102151	0	13.98075072	4	3
760	f	bachelors degree	59	o	M	crosswords	crosswords.o	62	15.88780333	18	109.8684494	-465.891	89.35950383	-438	96.65600612	9	103.2905327	8	127.5555825	11	97.4198399	3	72.32266178	98.96323458	13	94.8395275	-459.105	89.50279329	-412	103.0124308	14	119.1220614	7	114.8036483	14	113.8168191	5	97.01798159	107.7763586	-15.02892189	0.143289463	6.356424632	15.83152864	-12.75193428	16.39697917	24.69531981	8.813124043	3	4
761	f	some college	43	y	M	lumosity	lumosity.y	60	12.83800722	14	97.84621295	-490.291	87.74880324	-419	100.9770084	5	90.43034386	6	102.2366507	11	97.4198399	5	97.01798159	93.46405142	16	103.9697618	-198.748	110.6069755	-374	114.0404806	4	87.02169153	6	102.2366507	12	102.1387281	7	121.0680766	110.05428	6.123548824	22.85817225	13.06347223	-3.408652324	0	4.718888164	24.05009504	16.59022853	5	4
762	f	bachelors degree	41	y	M	lumosity	lumosity.y	60	11.69775736	13	94.8395275	-358.931	96.91148389	-376	113.3618283	0	70.89374579	6	102.2366507	10	93.4066386	6	109.1710722	95.19393897	15	100.8687377	-440.892	90.88725766	-388	109.6336875	0	70.89374579	5	90.01558593	2	66.18670658	5	97.01798159	81.75996931	6.02921023	-6.024226227	-3.728140813	0	-12.22106476	-27.21993202	-12.15309064	-13.43396966	4	2
763	f	advanced degree	43	y	M	crosswords	crosswords.y	50	11.52498	25	129.8784281	-383.92	95.18609297	-492	85.84360186	12	112.8487574	8	127.5555825	11	97.4198399	6	109.1710722	113.9311304	26	132.9285386	-155.402	115.9571997	-447	94.56585795	12	112.8487574	7	114.8036483	10	93.4066386	7	121.0680766	120.6563877	3.050110484	20.77110669	8.72225609	0	-12.75193428	-4.013201299	11.89700439	6.725257288	3	3
764	f	some college	33	y	Y	lumosity	lumosity.y	57	15.19329444	17	106.9689563	-393.459	94.31039417	-344	123.4396335	8	100.0782549	7	114.8036483	9	90.06668352	6	109.1710722	109.5787928	15	100.8687377	-116.367	121.4754877	-453	93.3614607	10	106.4827223	7	114.8036483	8	87.11355617	5	97.01798159	104.9671706	-6.100218555	27.16509356	-30.07817277	6.404467432	0	-2.953127341	-12.15309064	-4.611622176	2	1
765	f	hs grad or less	18	y	Y	crosswords	crosswords.y	17	2.006486389	15	100.8687377	-236.579	106.6632072	-347	122.5816515	5	90.43034386	7	114.8036483	6	81.96893327	5	97.01798159	103.3669188	14	97.84621295	-314.989	100.6672464	-338	125.4947145	12	112.8487574	7	114.8036483	4	75.15990345	4	84.66554136	102.7164183	-3.022524772	-5.995960725	2.913062958	22.41841358	0	-6.809029814	-12.35244023	-0.650500478	2	2
766	f	some college	44	y	M	crosswords	crosswords.y	58	14.82805139	11	88.54321663	-523.727	85.14167358	-464	91.15914822	8	100.0782549	6	102.2366507	4	75.15990345	5	97.01798159	84.96412945	9	82.29468311	-264.79	104.7237569	-462	91.5288808	0	70.89374579	5	90.01558593	12	102.1387281	6	109.1710722	87.7227764	-6.248533522	19.58208329	0.369732583	-29.18450906	-12.22106476	26.97882461	12.15309064	2.758646953	4	4
767	m	advanced degree	20	y	Y	crosswords	crosswords.y	3	0.210625	3	57.8512193	-413.529	93.07667344	-558	76.13407106	0	70.89374579	4	78.64839376	5	78.88184489	3	72.32266178	60.5409171	11	88.54321663	-504.045	86.38131889	-683	63.88522797	4	87.02169153	6	102.2366507	12	102.1387281	4	84.66554136	79.43937075	30.69199733	-6.695354547	-12.24884309	16.12794574	23.58825693	23.25688317	12.34287958	18.89845365	2	2
768	f	hs grad or less	35	y	Y	crosswords	crosswords.y	55	10.08307556	13	94.8395275	-545.359	83.90431888	-459	92.11688449	0	70.89374579	7	114.8036483	12	102.1387281	6	109.1710722	91.93662628	15	100.8687377	-307.241	101.2049233	-441	95.98777089	1	77.29023023	6	102.2366507	12	102.1387281	4	84.66554136	91.14584497	6.02921023	17.30060442	3.870886395	6.396484438	-12.56699756	0	-24.50553087	-0.790781305	3	3
769	f	some college	40	y	M	lumosity	lumosity.y	64	13.95979875	19	112.8487574	-256.175	105.6415827	-438	96.65600612	13	116.0032086	7	114.8036483	15	120.1949445	8	133.0119868	124.215908	18	109.8684494	-196.107	111.1253416	-410	103.5889406	9	103.2905327	7	114.8036483	11	97.4198399	7	121.0680766	114.6527863	-2.980308053	5.48375884	6.932934445	-12.7126759	0	-22.77510457	-11.94391021	-9.563121659	NA	3
770	f	advanced degree	32	y	Y	lumosity	lumosity.y	20	9.824108194	9	82.29468311	-549.027	83.67041738	-451	93.74563994	9	103.2905327	6	102.2366507	12	102.1387281	5	97.01798159	91.15028016	11	88.54321663	-459.189	89.46944514	-452	93.53363859	4	87.02169153	5	90.01558593	14	113.8168191	5	97.01798159	89.99232144	6.248533522	5.79902776	-0.21200135	-16.26884117	-12.22106476	11.678091	0	-1.157958727	NA	NA
771	m	bachelors degree	35	y	Y	crosswords	crosswords.y	54	10.31414917	19	112.8487574	-315.19	100.495702	-405	104.8688661	10	106.4827223	6	102.2366507	15	120.1949445	4	84.66554136	107.7039886	18	109.8684494	-261.457	105.1288553	-400	106.1123696	7	96.91529003	8	127.5555825	13	107.6954863	8	133.0119868	120.8504718	-2.980308053	4.633153223	1.243503559	-9.567432261	25.31893183	-12.49945815	48.34644547	13.1464832	5	5
772	f	hs grad or less	64	o	M	lumosity	lumosity.o	66	35.20488958	18	109.8684494	-111.781	122.2964448	-355	119.7341376	3	83.61639412	5	90.01558593	4	75.15990345	5	97.01798159	99.35140352	18	109.8684494	-589.707	81.10253882	-417	101.5417153	8	100.0782549	6	102.2366507	10	93.4066386	5	97.01798159	96.27670249	0	-41.19390602	-18.19242231	16.46186073	12.22106476	18.24673514	0	-3.074701027	3	4
773	f	advanced degree	48	y	M	crosswords	crosswords.y	62	15.41321611	12	91.65967918	-595.806	80.83587294	-422	100.1304258	4	87.02169153	5	90.01558593	11	97.4198399	6	109.1710722	89.15241064	14	97.84621295	-537.579	84.1929265	-537	78.95188917	10	106.4827223	6	102.2366507	9	90.06668352	6	109.1710722	92.1553627	6.18653377	3.357053561	-21.17853664	19.46103075	12.22106476	-7.353156381	0	3.002952066	4	4
774	f	bachelors degree	29	y	Y	crosswords	crosswords.y	30	15.73941028	17	106.9689563	-263.294	105.0026123	-452	93.53363859	7	96.91529003	7	114.8036483	13	107.6954863	8	133.0119868	113.9426061	17	106.9689563	-103.832	123.2148701	-394	107.9902732	7	96.91529003	5	90.01558593	5	78.88184489	6	109.1710722	103.1113571	0	18.21225776	14.45663461	0	-24.78806232	-28.81364142	-23.8409146	-10.83124892	4	5
775	m	bachelors degree	39	y	Y	crosswords	crosswords.y	21	5.003890555	16	103.9697618	-184.226	112.7789827	-340	124.913806	11	109.6062241	6	102.2366507	12	102.1387281	5	97.01798159	112.5871866	23	124.4099523	-138.833	118.9801506	-365	116.9642084	12	112.8487574	6	102.2366507	14	113.8168191	4	84.66554136	117.8255447	20.44019053	6.201167851	-7.949597565	3.242533378	0	11.678091	-12.35244023	5.238358084	4	4
776	f	bachelors degree	66	o	O	crosswords	crosswords.o	56	14.04149806	14	97.84621295	-553.766	83.4598804	-413	102.7126304	7	96.91529003	0	61.31611067	6	81.96893327	4	84.66554136	78.15455883	11	88.54321663	-489.944	87.893878	-534	79.29541578	5	90.43034386	5	90.01558593	8	87.11355617	4	84.66554136	77.88193965	-9.302996324	4.433997594	-23.4172146	-6.484946169	28.69947526	5.144622908	0	-0.272619175	3	4
777	f	bachelors degree	34	y	Y	lumosity	lumosity.y	49	19.02456666	23	124.4099523	-294.287	102.330897	-400	106.1123696	12	112.8487574	6	102.2366507	10	93.4066386	6	109.1710722	112.1164469	24	127.258891	-171.726	113.7429451	-397	107.0063377	10	106.4827223	6	102.2366507	4	75.15990345	5	97.01798159	106.9440594	2.848938706	11.41204811	0.893968047	-6.366035154	0	-18.24673514	-12.15309064	-5.172387478	4	4
778	f	bachelors degree	26	y	Y	lumosity	lumosity.y	67	16.28047153	10	85.57372703	-427.878	91.89784845	-550	77.14854871	0	70.89374579	6	102.2366507	12	102.1387281	5	97.01798159	82.19708519	15	100.8687377	-604.432	80.39790499	-478	88.51326299	8	100.0782549	5	90.01558593	12	102.1387281	6	109.1710722	92.83116846	15.2950107	-11.49994345	11.36471428	29.18450906	-12.22106476	0	12.15309064	10.63408327	1	2
779	f	bachelors degree	61	o	M	crosswords	crosswords.o	44	11.37469111	10	85.57372703	-492.401	87.66538681	-505	83.69062158	8	100.0782549	5	90.01558593	11	97.4198399	5	97.01798159	85.49660785	16	103.9697618	-351.188	98.00422702	-546	77.61316791	9	103.2905327	5	90.01558593	11	97.4198399	6	109.1710722	94.90668691	18.39603475	10.33884022	-6.077453669	3.212277852	0	0	12.15309064	9.410079062	3	3
780	f	bachelors degree	29	y	Y	crosswords	crosswords.y	26	6.534069722	15	100.8687377	-259.836	105.5696562	-431	98.13198035	8	100.0782549	9	140.9426022	13	107.6954863	7	121.0680766	117.9545543	19	112.8487574	-310.226	100.9695399	-474	89.17176197	10	106.4827223	6	102.2366507	13	107.6954863	6	109.1710722	106.9108932	11.98001971	-4.600116288	-8.960218375	6.404467432	-38.70595156	0	-11.89700439	-11.04366106	1	2
781	m	NA	26	y	Y	lumosity	lumosity.y	48	11.96282125	14	97.84621295	-476.594	88.7071531	-412	103.0124308	11	109.6062241	5	90.01558593	12	102.1387281	5	97.01798159	96.97616143	18	109.8684494	-738.324	72.79918511	-378	112.741526	6	93.70903787	5	90.01558593	13	107.6954863	4	84.66554136	92.92293384	12.02223643	-15.90796799	9.729095264	-15.89718619	0	5.556758251	-12.35244023	-4.053227589	3	3
783	f	bachelors degree	54	o	M	lumosity	lumosity.o	66	17.02000903	23	124.4099523	-85.302	126.860641	-361	118.2244304	15	122.4665932	5	90.01558593	12	102.1387281	5	97.01798159	119.6899538	25	129.8784281	-196.107	111.1253416	-367	116.2690585	15	122.4665932	6	102.2366507	14	113.8168191	6	109.1710722	125.9153675	5.468475799	-15.73529942	-1.955371861	0	12.22106476	11.678091	12.15309064	6.225413756	4	4
784	f	bachelors degree	25	y	Y	crosswords	crosswords.y	4	0.999987778	13	94.8395275	-172.743	113.3507497	-294	142.9836129	5	90.43034386	7	114.8036483	15	120.1949445	3	72.32266178	111.7280398	17	106.9689563	-355.019	97.50300339	-251	155.8191895	7	96.91529003	6	102.2366507	13	107.6954863	5	97.01798159	115.4416765	12.12942879	-15.84774634	12.8355766	6.484946169	-12.56699756	-12.49945815	24.69531981	3.713636729	3	4
785	f	advanced degree	29	y	Y	lumosity	lumosity.y	56	15.62268889	24	127.258891	-146.632	117.2932101	-373	114.2907573	12	112.8487574	6	102.2366507	9	90.06668352	5	97.01798159	114.6108099	24	127.258891	-189.432	111.8294817	-363	117.5640076	11	109.6062241	6	102.2366507	15	120.1949445	6	109.1710722	123.8527254	0	-5.463728414	3.273250285	-3.242533378	0	30.12826095	12.15309064	9.241915569	3	3
786	m	bachelors degree	31	y	Y	lumosity	lumosity.y	18	4.618441806	14	97.84621295	-164.372	114.2088377	-419	100.9770084	4	87.02169153	7	114.8036483	17	137.1423714	6	109.1710722	114.6587923	15	100.8687377	-442.184	90.83791061	-375	113.7372763	5	90.43034386	9	140.9426022	17	137.1423714	0	59.35814637	108.1107762	3.022524772	-23.37092709	12.76026787	3.408652324	26.138954	0	-49.81292586	-6.548016106	2	5
787	f	some college	19	y	Y	crosswords	crosswords.y	9	1.831153611	11	88.54321663	-587.18	81.23365985	-421	100.3950446	4	87.02169153	6	102.2366507	13	107.6954863	3	72.32266178	85.05010191	13	94.8395275	-369.063	96.21903	-372	114.5570077	7	96.91529003	7	114.8036483	7	84.57097827	6	109.1710722	102.5877243	6.296310865	14.98537015	14.16196312	9.893598494	12.56699756	-23.12450804	36.84841046	17.53762241	4	2
788	f	advanced degree	50	o	M	crosswords	crosswords.o	52	9.911011388	20	115.7229157	-157.142	115.5944001	-519	81.68167022	7	96.91529003	5	90.01558593	4	75.15990345	4	84.66554136	90.02488501	23	124.4099523	-252.416	106.2137347	-414	102.4290109	5	90.43034386	5	90.01558593	9	90.06668352	4	84.66554136	96.94192746	8.687036577	-9.380665396	20.7473407	-6.484946169	0	14.90678006	0	6.917042451	2	3
789	m	hs grad or less	28	y	Y	crosswords	crosswords.y	59	11.98780722	6	71.50566007	-47.359	136.9072026	-476	88.83045447	10	106.4827223	6	102.2366507	11	97.4198399	5	97.01798159	99.94783023	9	82.29468311	-85.302	126.860641	-390	109.1082611	6	93.70903787	6	102.2366507	8	87.11355617	4	84.66554136	96.40722471	10.78902304	-10.04656158	20.27780667	-12.77368442	0	-10.30628372	-12.35244023	-3.540605522	3	5
790	m	bachelors degree	30	y	Y	lumosity	lumosity.y	48	9.544241111	18	109.8684494	-479.649	88.50326827	-385	110.621335	10	106.4827223	5	90.01558593	15	120.1949445	5	97.01798159	105.4142511	21	118.4923683	-227.431	107.7337662	-395	107.6275565	10	106.4827223	7	114.8036483	13	107.6954863	6	109.1710722	117.1778369	8.6239189	19.23049796	-2.993778521	0	24.78806232	-12.49945815	12.15309064	11.76358574	3	3
791	f	hs grad or less	18	y	Y	crosswords	crosswords.y	27	12.68041222	10	85.57372703	-320.713	100.3279497	-373	114.2907573	7	96.91529003	5	90.01558593	13	107.6954863	6	109.1710722	100.7679748	14	97.84621295	-285.672	102.9136352	-365	116.9642084	2	80.40665395	6	102.2366507	15	120.1949445	6	109.1710722	107.1688315	12.27248593	2.585685485	2.673451081	-16.50863608	12.22106476	12.49945815	0	6.40085678	5	1
792	m	advanced degree	37	y	Y	crosswords	crosswords.y	65	17.49097944	18	109.8684494	-365.369	96.51450927	-455	92.86039548	6	93.70903787	6	102.2366507	10	93.4066386	6	109.1710722	99.38124137	19	112.8487574	-196.785	110.9300349	-483	87.46044138	11	109.6062241	5	90.01558593	15	120.1949445	4	84.66554136	103.6848798	2.980308053	14.41552566	-5.399954109	15.89718619	-12.22106476	26.78830587	-24.50553087	4.303638421	2	4
793	f	bachelors degree	47	y	M	lumosity	lumosity.y	30	5.969088611	16	103.9697618	-123.177	119.5322891	-457	92.49939293	14	119.1220614	5	90.01558593	15	120.1949445	5	97.01798159	110.2463717	17	106.9689563	-218.239	109.0009546	-464	91.15914822	16	125.4160785	6	102.2366507	14	113.8168191	6	109.1710722	113.8910297	2.999194503	-10.53133458	-1.340244714	6.294017188	12.22106476	-6.378125399	12.15309064	3.644657949	3	4
794	f	advanced degree	38	y	Y	crosswords	crosswords.y	55	13.78423389	16	103.9697618	-433.99	91.42377682	-470	89.9830089	14	119.1220614	7	114.8036483	14	113.8168191	6	109.1710722	110.2275574	17	106.9689563	-217.51	109.1665804	-452	93.53363859	16	125.4160785	7	114.8036483	15	120.1949445	8	133.0119868	125.276269	2.999194503	17.74280358	3.550629698	6.294017188	0	6.378125399	23.8409146	15.04871161	3	1
796	f	bachelors degree	31	y	Y	lumosity	lumosity.y	48	11.56101292	19	112.8487574	-383.961	95.11934849	-367	116.2690585	2	80.40665395	7	114.8036483	11	97.4198399	5	97.01798159	103.2752658	21	118.4923683	-164.372	114.2088377	-401	105.8259904	11	109.6062241	7	114.8036483	11	97.4198399	5	97.01798159	113.7429451	5.643610847	19.08948921	-10.44306809	29.19957011	0	0	0	10.46767931	3	5
797	f	advanced degree	27	y	Y	crosswords	crosswords.y	21	7.396553889	22	121.4547391	-236.579	106.6632072	-427	99.01925723	9	103.2905327	6	102.2366507	14	113.8168191	5	97.01798159	110.5496343	21	118.4923683	-188.541	111.9621709	-384	110.9835584	13	116.0032086	7	114.8036483	13	107.6954863	6	109.1710722	121.6218928	-2.962370769	5.29896376	11.96430118	12.7126759	12.56699756	-6.121332753	12.15309064	11.07225845	2	3
798	f	bachelors degree	74	o	O	lumosity	lumosity.o	58	14.718895	18	109.8684494	-488.833	87.9608503	-539	78.62784794	12	112.8487574	3	69.29136417	7	84.57097827	5	97.01798159	85.26895145	17	106.9689563	-1094.112	60.17359708	-431	98.13198035	12	112.8487574	5	90.01558593	10	93.4066386	3	72.32266178	83.8312305	-2.899493105	-27.78725323	19.50413241	0	20.72422176	8.835660325	-24.69531981	-1.437720946	3	1
799	f	some college	23	y	Y	crosswords	crosswords.y	59	20.47001	11	88.54321663	-355.019	97.50300339	-394	107.9902732	13	116.0032086	5	90.01558593	13	107.6954863	3	72.32266178	95.03676564	12	91.65967918	-252.907	105.9185238	-425	99.46328321	16	125.4160785	6	102.2366507	6	81.96893327	6	109.1710722	103.700244	3.116462554	8.415520423	-8.52698999	9.412869933	12.22106476	-25.72655305	36.84841046	8.663478322	4	4
800	f	advanced degree	47	y	M	lumosity	lumosity.y	54	11.08915306	9	82.29468311	-599.96	80.58025153	-407	104.3725965	5	90.43034386	6	102.2366507	11	97.4198399	4	84.66554136	85.6032869	10	85.57372703	-731.573	73.34062984	-371	114.870504	1	77.29023023	6	102.2366507	10	93.4066386	5	97.01798159	86.08606779	3.279043918	-7.239621681	10.49790744	-13.14011363	0	-4.013201299	12.35244023	0.482780897	3	4
801	f	some college	54	o	M	lumosity	lumosity.o	39	8.79725375	15	100.8687377	-447.592	90.1823884	-388	109.6336875	5	90.43034386	5	90.01558593	9	90.06668352	4	84.66554136	89.00669503	9	82.29468311	-474.432	88.90897258	-432	97.8951468	9	103.2905327	6	102.2366507	6	81.96893327	6	109.1710722	91.48951581	-18.57405462	-1.273415821	-11.73854071	12.86018885	12.22106476	-8.097750249	24.50553087	2.48282078	4	2
802	m	some college	48	y	M	crosswords	crosswords.y	48	17.28946028	15	100.8687377	-101.001	123.7738898	-396	107.3069857	17	128.2711147	7	114.8036483	13	107.6954863	6	109.1710722	122.307699	18	109.8684494	-409.642	93.2956396	-452	93.53363859	10	106.4827223	5	90.01558593	11	97.4198399	5	97.01798159	96.82007627	8.99971166	-30.47825019	-13.77334715	-21.78839242	-24.78806232	-10.27564642	-12.15309064	-25.48762274	2	3
803	m	some college	22	y	Y	crosswords	crosswords.y	44	19.06520056	10	85.57372703	-161.009	114.9928228	-453	93.3614607	4	87.02169153	7	114.8036483	11	97.4198399	4	84.66554136	94.57779365	17	106.9689563	-116.13	121.7917755	-352	120.8211365	0	70.89374579	6	102.2366507	13	107.6954863	6	109.1710722	109.7576756	21.39522925	6.798952728	27.45967583	-16.12794574	-12.56699756	10.27564642	24.50553087	15.1798819	3	3
804	m	bachelors degree	29	y	Y	lumosity	lumosity.y	32	11.56383083	15	100.8687377	-256.134	105.6936104	-374	114.0404806	7	96.91529003	6	102.2366507	13	107.6954863	6	109.1710722	108.9741999	14	97.84621295	-427.867	92.01831437	-437	96.84674887	3	83.61639412	7	114.8036483	7	84.57097827	7	121.0680766	97.54077946	-3.022524772	-13.67529601	-17.19373178	-13.2988959	12.56699756	-23.12450804	11.89700439	-11.43342048	5	5
805	f	hs grad or less	20	y	Y	lumosity	lumosity.y	55	21.32414778	11	88.54321663	-216.89	109.3062128	-386	110.2934782	11	109.6062241	6	102.2366507	15	120.1949445	7	121.0680766	114.7069252	15	100.8687377	-378.392	95.53010728	-384	110.9835584	9	103.2905327	8	127.5555825	10	93.4066386	7	121.0680766	112.5924864	12.3255211	-13.77610554	0.690080221	-6.315691356	25.31893183	-26.78830587	0	-2.114438782	4	2
806	NA	NA	23	y	Y	lumosity	lumosity.y	8	1.423913611	20	115.7229157	-505.473	86.18887544	-489	86.37006083	9	103.2905327	6	102.2366507	12	102.1387281	7	121.0680766	103.9350394	16	103.9697618	-879.695	65.27542145	-496	85.25687548	12	112.8487574	7	114.8036483	13	107.6954863	9	144.874283	108.5104842	-11.75315395	-20.91345398	-1.11318535	9.558224734	12.56699756	5.556758251	23.80620642	4.575444745	3	4
807	m	advanced degree	43	y	M	lumosity	lumosity.y	51	30.58811389	13	94.8395275	-271.844	103.8502509	-483	87.46044138	7	96.91529003	4	78.64839376	13	107.6954863	5	97.01798159	91.62486199	14	97.84621295	-142.668	117.9393078	-383	111.3076943	1	77.29023023	0	61.31611067	14	113.8168191	6	109.1710722	97.04838168	3.006685458	14.08905684	23.84725294	-19.62505979	-17.33228309	6.121332753	12.15309064	5.423519695	5	3
808	f	advanced degree	25	y	Y	lumosity	lumosity.y	67	75.03957736	16	103.9697618	-263.294	105.0026123	-445	95.02101858	11	109.6062241	5	90.01558593	14	113.8168191	5	97.01798159	103.4280905	13	94.8395275	-563.027	82.79341523	-583	73.02750417	8	100.0782549	6	102.2366507	13	107.6954863	4	84.66554136	86.41504713	-9.130234283	-22.20919708	-21.99351441	-9.527969208	12.22106476	-6.121332753	-12.35244023	-17.01304334	1	4
809	f	some college	22	y	Y	lumosity	lumosity.y	37	8.709117778	15	100.8687377	-101.001	123.7738898	-454	93.12637837	2	80.40665395	6	102.2366507	15	120.1949445	6	109.1710722	107.1897247	13	94.8395275	-530.614	84.75325368	-435	97.25327203	0	70.89374579	7	114.8036483	13	107.6954863	6	109.1710722	94.89879113	-6.02921023	-39.02063611	4.126893668	-9.512908155	12.56699756	-12.49945815	0	-12.29093353	2	4
810	f	hs grad or less	53	o	M	crosswords	crosswords.o	56	10.31090611	11	88.54321663	-184.97	112.6083954	-608	70.01241248	3	83.61639412	6	102.2366507	12	102.1387281	4	84.66554136	86.10324772	10	85.57372703	-440.744	90.94097858	-518	81.86102104	6	93.70903787	5	90.01558593	4	75.15990345	5	97.01798159	79.26639496	-2.969489603	-21.66741679	11.84860856	10.09264375	-12.22106476	-26.97882461	12.35244023	-6.836852769	4	2
811	f	advanced degree	53	o	M	lumosity	lumosity.o	68	71.94306708	13	94.8395275	-365.369	96.51450927	-577	73.91727523	9	103.2905327	7	114.8036483	6	81.96893327	4	84.66554136	87.52901505	16	103.9697618	-263.294	105.0026123	-574	74.19989094	9	103.2905327	5	90.01558593	14	113.8168191	5	97.01798159	96.7209178	9.130234283	8.488103034	0.282615706	0	-24.78806232	31.8478858	12.35244023	9.191902751	4	2
812	f	bachelors degree	40	y	M	crosswords	crosswords.y	58	16.52791306	21	118.4923683	-494.911	87.38099079	-364	117.264271	7	96.91529003	6	102.2366507	10	93.4066386	4	84.66554136	99.93292449	20	115.7229157	-218.239	109.0009546	-384	110.9835584	10	106.4827223	4	78.64839376	8	87.11355617	6	109.1710722	103.954327	-2.76945256	21.61996377	-6.280712598	9.567432261	-23.58825693	-6.293082423	24.50553087	4.021402526	1	5
813	f	hs grad or less	48	y	M	lumosity	lumosity.y	69	14.81366542	10	85.57372703	-101.001	123.7738898	-433	97.65778733	9	103.2905327	6	102.2366507	13	107.6954863	4	84.66554136	100.9770084	10	85.57372703	-290.774	102.6369078	-467	90.54425439	4	87.02169153	5	90.01558593	9	90.06668352	6	109.1710722	88.81569826	0	-21.13698195	-7.113532946	-16.26884117	-12.22106476	-17.6288028	24.50553087	-12.16131017	4	1
814	m	bachelors degree	29	y	Y	crosswords	crosswords.y	51	14.42154944	23	124.4099523	-91.81	125.526366	-361	118.2244304	10	106.4827223	6	102.2366507	10	93.4066386	7	121.0680766	122.1291179	22	121.4547391	-252.621	106.1164189	-341	124.5226947	6	93.70903787	6	102.2366507	13	107.6954863	6	109.1710722	115.6585142	-2.955213248	-19.40994713	6.298264349	-12.77368442	0	14.28884771	-11.89700439	-6.470603707	3	5
817	m	advanced degree	30	y	Y	crosswords	crosswords.y	37	9.025141389	11	88.54321663	-271.795	104.0431346	-342	124.1068203	12	112.8487574	5	90.01558593	12	102.1387281	4	84.66554136	101.3208523	15	100.8687377	-315.17	100.585194	-366	116.6156143	11	109.6062241	7	114.8036483	10	93.4066386	4	84.66554136	104.8256785	12.3255211	-3.457940677	-7.491205967	-3.242533378	24.78806232	-8.732089463	0	3.504826223	5	5
818	m	some college	22	y	Y	lumosity	lumosity.y	49	9.827632222	12	91.65967918	-584.205	81.49168624	-424	99.68323205	9	103.2905327	8	127.5555825	14	113.8168191	6	109.1710722	106.5113724	15	100.8687377	-198.748	110.6069755	-347	122.5816515	11	109.6062241	6	102.2366507	12	102.1387281	6	109.1710722	113.7089616	9.209058542	29.11528925	22.89841948	6.315691356	-25.31893183	-11.678091	0	7.197589228	4	2
819	m	bachelors degree	47	y	M	crosswords	crosswords.y	52	12.73669472	17	106.9689563	-198.748	110.6069755	-427	99.01925723	7	96.91529003	5	90.01558593	10	93.4066386	5	97.01798159	98.40957667	19	112.8487574	-214.467	109.3921935	-424	99.68323205	8	100.0782549	5	90.01558593	13	107.6954863	5	97.01798159	103.8926296	5.879801159	-1.214781973	0.663974824	3.162964829	0	14.28884771	0	5.483052969	1	3
820	m	some college	62	o	M	lumosity	lumosity.o	69	33.38438058	13	94.8395275	-763.467	71.46024928	-571	74.52106878	8	100.0782549	4	78.64839376	11	97.4198399	4	84.66554136	76.52239031	11	88.54321663	-686.122	75.54793105	-501	84.4055999	11	109.6062241	5	90.01558593	12	102.1387281	5	97.01798159	86.8802431	-6.296310865	4.087681774	9.884531116	9.527969208	11.36719217	4.718888164	12.35244023	10.35785279	2	3
821	NA	NA	52	o	M	crosswords	crosswords.o	50	17.90120028	13	94.8395275	-409.642	93.2956396	-419	100.9770084	8	100.0782549	6	102.2366507	4	75.15990345	6	109.1710722	93.99275481	18	109.8684494	-186.398	112.2616031	-431	98.13198035	7	96.91529003	4	78.64839376	5	78.88184489	5	97.01798159	92.97287605	15.02892189	18.96596346	-2.845028078	-3.162964829	-23.58825693	3.721941439	-12.15309064	-1.019878759	2	2
822	m	bachelors degree	23	y	Y	crosswords	crosswords.y	3	0.201315	13	94.8395275	-173.992	113.1470924	-389	109.3559537	3	83.61639412	6	102.2366507	8	87.11355617	5	97.01798159	96.73236639	11	88.54321663	-321.254	100.1527852	-431	98.13198035	0	70.89374579	6	102.2366507	11	97.4198399	6	109.1710722	91.63792371	-6.296310865	-12.99430716	-11.22397332	-12.72264833	0	10.30628372	12.15309064	-5.09444268	3	3
823	m	advanced degree	55	o	M	lumosity	lumosity.o	33	5.918254722	18	109.8684494	-186.398	112.2616031	-534	79.29541578	8	100.0782549	5	90.01558593	13	107.6954863	4	84.66554136	95.93367496	20	115.7229157	-619.236	79.42028611	-595	71.57329045	13	116.0032086	5	90.01558593	15	120.1949445	6	109.1710722	100.3167679	5.854466341	-32.84131696	-7.722125326	15.92495375	0	12.49945815	24.50553087	4.383092991	4	4
824	m	bachelors degree	24	y	Y	lumosity	lumosity.y	32	6.696494041	14	97.84621295	-110.016	122.7097698	-438	96.65600612	15	122.4665932	8	127.5555825	11	97.4198399	6	109.1710722	117.7878507	18	109.8684494	-176.823	113.0054202	-364	117.264271	15	122.4665932	8	127.5555825	10	93.4066386	8	133.0119868	128.5397507	12.02223643	-9.704349543	20.60826488	0	0	-4.013201299	23.8409146	10.75190001	4	5
825	m	some college	45	y	M	crosswords	crosswords.y	6	1.995582222	11	88.54321663	-260.226	105.4580238	-497	85.11121134	6	93.70903787	4	78.64839376	13	107.6954863	4	84.66554136	86.11469089	9	82.29468311	-501.478	86.73210877	-452	93.53363859	6	93.70903787	5	90.01558593	11	97.4198399	4	84.66554136	82.51709539	-6.248533522	-18.72591502	8.422427249	0	11.36719217	-10.27564642	0	-3.597595495	2	3
826	m	some college	22	y	Y	lumosity	lumosity.y	47	10.18804153	16	103.9697618	-214.467	109.3921935	-363	117.5640076	10	106.4827223	7	114.8036483	7	84.57097827	6	109.1710722	111.1008255	10	85.57372703	-84.028	128.9367294	-501	84.4055999	4	87.02169153	7	114.8036483	12	102.1387281	6	109.1710722	102.8756708	-18.39603475	19.54453585	-33.1584077	-19.46103075	0	17.56774979	0	-8.22515472	3	4
827	f	bachelors degree	27	y	Y	crosswords	crosswords.y	59	12.75747528	18	109.8684494	-307.241	101.2049233	-411	103.29435	9	103.2905327	5	90.01558593	9	90.06668352	5	97.01798159	98.64173477	23	124.4099523	-378.987	95.4560364	-451	93.74563994	9	103.2905327	6	102.2366507	9	90.06668352	5	97.01798159	101.2797075	14.54150292	-5.748886904	-9.548710025	0	12.22106476	0	0	2.637972758	4	2
828	m	bachelors degree	29	y	Y	crosswords	crosswords.y	68	18.46945806	25	129.8784281	-290.774	102.6369078	-445	95.02101858	18	131.5085227	8	127.5555825	16	127.595966	8	133.0119868	136.2514941	27	136.391296	-264.848	104.645504	-433	97.65778733	16	125.4160785	8	127.5555825	17	137.1423714	9	144.874283	144.2591705	6.512867873	2.008596166	2.636768751	-6.092444117	0	9.546405435	11.86229621	8.00767639	4	5
829	m	advanced degree	26	y	Y	crosswords	crosswords.y	27	5.562658889	18	109.8684494	-290.774	102.6369078	-373	114.2907573	7	96.91529003	7	114.8036483	14	113.8168191	5	97.01798159	111.8702102	18	109.8684494	-84.028	128.9367294	-486	86.90753509	10	106.4827223	7	114.8036483	14	113.8168191	5	97.01798159	113.9139322	0	26.29982154	-27.38322223	9.567432261	0	0	0	2.043722045	2	2
830	f	advanced degree	24	y	Y	lumosity	lumosity.y	7	1.899234167	16	103.9697618	-408.93	93.36557027	-409	103.8964838	11	109.6062241	5	90.01558593	13	107.6954863	5	97.01798159	101.1488549	16	103.9697618	-452.314	89.91771258	-364	117.264271	6	93.70903787	7	114.8036483	14	113.8168191	6	109.1710722	110.335961	0	-3.447857682	13.36778722	-15.89718619	24.78806232	6.121332753	12.15309064	9.187106061	2	3
831	f	bachelors degree	29	y	Y	crosswords	crosswords.y	33	12.51435722	21	118.4923683	-142.668	117.9393078	-392	108.5586767	13	116.0032086	5	90.01558593	13	107.6954863	5	97.01798159	113.2678912	18	109.8684494	-192.333	111.5969615	-368	115.9178826	11	109.6062241	7	114.8036483	11	97.4198399	7	121.0680766	119.5409917	-8.6239189	-6.342346271	7.359205836	-6.396984543	24.78806232	-10.27564642	24.05009504	6.273100511	2	3
832	f	some college	23	y	Y	lumosity	lumosity.y	40	9.077326667	12	91.65967918	-232.029	107.0812315	-391	108.8231249	12	112.8487574	5	90.01558593	13	107.6954863	4	84.66554136	100.4845169	11	88.54321663	-269.623	104.4153839	-396	107.3069857	9	103.2905327	5	90.01558593	6	81.96893327	4	84.66554136	90.13155061	-3.116462554	-2.665847611	-1.516139188	-9.558224734	0	-25.72655305	0	-10.35296625	1	3
833	f	some college	29	y	Y	lumosity	lumosity.y	28	5.537108889	13	94.8395275	-201.849	110.3123492	-415	102.1086165	9	103.2905327	6	102.2366507	2	66.18670658	5	97.01798159	94.03310858	11	88.54321663	-252.621	106.1164189	-370	115.2217812	12	112.8487574	6	102.2366507	13	107.6954863	6	109.1710722	110.1759008	-6.296310865	-4.195930338	13.11316471	9.558224734	0	41.50877973	12.15309064	16.14279227	1	2
834	m	advanced degree	27	y	Y	lumosity	lumosity.y	43	8.825099167	26	132.9285386	-98.626	124.3124216	-413	102.7126304	18	131.5085227	7	114.8036483	10	93.4066386	6	109.1710722	126.9912848	28	139.4590829	-84.028	128.9367294	-406	104.6415947	11	109.6062241	6	102.2366507	10	93.4066386	7	121.0680766	124.3124216	6.530544309	4.624307815	1.928964319	-21.90229859	-12.56699756	0	11.89700439	-2.678863265	3	4
835	m	advanced degree	29	y	Y	crosswords	crosswords.y	15	3.841496389	21	118.4923683	-252.907	105.9185238	-369	115.5624496	17	128.2711147	9	140.9426022	17	137.1423714	7	121.0680766	142.1487807	24	127.258891	-357.241	97.17365544	-370	115.2217812	17	128.2711147	6	102.2366507	13	107.6954863	6	109.1710722	121.1081206	8.766522723	-8.744868371	-0.340668381	0	-38.70595156	-29.4468851	-11.89700439	-21.04066012	3	3
836	m	some college	21	y	Y	lumosity	lumosity.y	59	12.76809472	18	109.8684494	-86.562	126.1676356	-386	110.2934782	13	116.0032086	7	114.8036483	8	87.11355617	7	121.0680766	120.6467739	18	109.8684494	-101.001	123.7738898	-376	113.3618283	19	134.6704795	6	102.2366507	16	127.595966	7	121.0680766	132.448103	0	-2.393745793	3.068350133	18.66727092	-12.56699756	40.4824098	0	11.80132902	3	2
837	m	advanced degree	33	y	Y	lumosity	lumosity.y	33	11.06731597	10	85.57372703	-209.09	109.6978949	-407	104.3725965	2	80.40665395	7	114.8036483	10	93.4066386	6	109.1710722	99.25441214	9	82.29468311	-307.241	101.2049233	-436	97.04838168	9	103.2905327	6	102.2366507	6	81.96893327	6	109.1710722	94.4303438	-3.279043918	-8.492971595	-7.324214829	22.88387876	-12.56699756	-11.43770533	0	-4.82406834	5	3
838	f	advanced degree	65	o	O	lumosity	lumosity.o	43	12.17522514	17	106.9689563	-352.224	97.77088515	-527	80.31004621	3	83.61639412	5	90.01558593	10	93.4066386	5	97.01798159	87.25312789	16	103.9697618	-268.303	104.4698927	-643	67.23536382	4	87.02169153	4	78.64839376	12	102.1387281	4	84.66554136	82.48766262	-2.999194503	6.699007568	-13.07468239	3.405297409	-11.36719217	8.732089463	-12.35244023	-4.765465268	1	2
839	m	some college	21	y	Y	lumosity	lumosity.y	57	11.43905601	21	118.4923683	-320.713	100.3279497	-402	105.565664	11	109.6062241	6	102.2366507	6	81.96893327	5	97.01798159	103.5429421	24	127.258891	-527.63	84.95180732	-387	109.9797641	3	83.61639412	5	90.01558593	13	107.6954863	5	97.01798159	99.98882078	8.766522723	-15.37614243	4.414100006	-25.98982994	-12.22106476	25.72655305	0	-3.554121294	4	5
840	f	some college	42	y	M	lumosity	lumosity.y	0	0	11	88.54321663	-648.427	77.61316791	-448	94.35441755	2	80.40665395	5	90.01558593	5	78.88184489	5	97.01798159	77.66975492	13	94.8395275	-86.562	126.1676356	-435	97.25327203	3	83.61639412	6	102.2366507	8	87.11355617	4	84.66554136	94.02100699	6.296310865	48.55446767	2.898854479	3.209740174	12.22106476	8.231711283	-12.35244023	16.35125208	4	3
841	m	bachelors degree	20	y	Y	lumosity	lumosity.y	38	7.262973056	8	78.75052699	-216.89	109.3062128	-525	80.71727969	0	70.89374579	5	90.01558593	9	90.06668352	4	84.66554136	77.18416018	14	97.84621295	-351.792	97.90267308	-459	92.11688449	5	90.43034386	6	102.2366507	5	78.88184489	6	109.1710722	92.05263852	19.09568597	-11.40353974	11.3996048	19.53659806	12.22106476	-11.18483862	24.50553087	14.86847833	4	4
842	f	some college	19	y	Y	crosswords	crosswords.y	52	12.58295889	14	97.84621295	-363.861	96.57190953	-370	115.2217812	6	93.70903787	7	114.8036483	13	107.6954863	6	109.1710722	108.5586767	16	103.9697618	-399.575	93.95235752	-426	99.23202524	7	96.91529003	5	90.01558593	9	90.06668352	6	109.1710722	95.77494362	6.123548824	-2.619552017	-15.98975601	3.206252155	-24.78806232	-17.6288028	0	-12.7837331	2	4
843	m	bachelors degree	28	y	Y	lumosity	lumosity.y	51	34.6733285	20	115.7229157	-486.828	88.02245857	-430	98.36085186	3	83.61639412	7	114.8036483	12	102.1387281	6	109.1710722	102.8339312	25	129.8784281	-217.51	109.1665804	-409	103.8964838	14	119.1220614	8	127.5555825	15	120.1949445	7	121.0680766	132.2951034	14.15551238	21.14412183	5.535631919	35.50566723	12.75193428	18.0562164	11.89700439	29.46117219	3	3
844	f	bachelors degree	60	o	M	crosswords	crosswords.o	59	17.26114	15	100.8687377	-357.241	97.17365544	-451	93.74563994	8	100.0782549	6	102.2366507	12	102.1387281	5	97.01798159	98.25209494	16	103.9697618	-369.063	96.21903	-410	103.5889406	9	103.2905327	5	90.01558593	15	120.1949445	5	97.01798159	103.3630974	3.101024052	-0.954625438	9.843300625	3.212277852	-12.22106476	18.0562164	0	5.111002471	3	3
845	m	bachelors degree	28	y	Y	crosswords	crosswords.y	48	24.87225389	15	100.8687377	-483.891	88.17560324	-390	109.1082611	9	103.2905327	5	90.01558593	10	93.4066386	5	97.01798159	95.47553941	13	94.8395275	-171.726	113.7429451	-412	103.0124308	2	80.40665395	6	102.2366507	10	93.4066386	5	97.01798159	96.11507789	-6.02921023	25.56734187	-6.095830384	-22.88387876	12.22106476	0	0	0.639538475	3	3
846	f	advanced degree	39	y	Y	lumosity	lumosity.y	46	9.328168354	16	103.9697618	-542.128	84.11479834	-405	104.8688661	5	90.43034386	6	102.2366507	8	87.11355617	7	121.0680766	98.34210698	16	103.9697618	-321.254	100.1527852	-423	99.9031128	11	109.6062241	7	114.8036483	10	93.4066386	6	109.1710722	107.471063	0	16.0379869	-4.965753286	19.17588021	12.56699756	6.293082423	-11.89700439	9.128956037	4	5
847	m	some college	56	o	M	crosswords	crosswords.o	49	12.43139139	12	91.65967918	-392.261	94.40238768	-629	68.18021125	7	96.91529003	7	114.8036483	7	84.57097827	3	72.32266178	81.06126607	14	97.84621295	-221.795	108.6465268	-507	83.32230277	5	90.43034386	4	78.64839376	7	84.57097827	5	97.01798159	85.28704751	6.18653377	14.24413916	15.14209152	-6.484946169	-36.15525449	0	24.69531981	4.225781443	5	2
848	m	some college	60	o	M	crosswords	crosswords.o	65	17.09077694	13	94.8395275	-685.128	75.5900477	-540	78.4620184	8	100.0782549	5	90.01558593	14	113.8168191	4	84.66554136	84.62778944	9	82.29468311	-348.18	98.21832437	-630	68.00118446	5	90.43034386	5	90.01558593	11	97.4198399	4	84.66554136	78.56596865	-12.54484439	22.62827668	-10.46083394	-9.647910998	0	-16.39697917	0	-6.061820788	2	5
849	f	hs grad or less	18	y	Y	lumosity	lumosity.y	44	10.54723167	21	118.4923683	-154.501	116.3565677	-348	122.2515532	17	128.2711147	7	114.8036483	15	120.1949445	7	121.0680766	134.8896427	23	124.4099523	-85.302	126.860641	-437	96.84674887	4	87.02169153	6	102.2366507	9	90.06668352	6	109.1710722	108.9697436	5.917584017	10.50407327	-25.40480435	-41.24942318	-12.56699756	-30.12826095	-11.89700439	-25.91989904	4	4
850	f	some college	45	y	M	crosswords	crosswords.y	9	3.091979722	14	97.84621295	-374.107	95.81370155	-404	105.1012089	12	112.8487574	6	102.2366507	12	102.1387281	5	97.01798159	103.054268	12	91.65967918	-101.001	123.7738898	-476	88.83045447	12	112.8487574	6	102.2366507	5	78.88184489	4	84.66554136	95.64295372	-6.18653377	27.96018824	-16.2707544	0	0	-23.25688317	-12.35244023	-7.411314268	2	3
851	f	bachelors degree	49	y	M	lumosity	lumosity.y	59	24.51199389	13	94.8395275	-349.53	98.07563584	-463	91.33146433	15	122.4665932	6	102.2366507	12	102.1387281	4	84.66554136	98.79133821	19	112.8487574	-123.177	119.5322891	-443	95.50283079	14	119.1220614	7	114.8036483	13	107.6954863	5	97.01798159	115.9834721	18.00922994	21.45665329	4.171366456	-3.344531828	12.56699756	5.556758251	12.35244023	17.19213386	4	5
852	m	advanced degree	42	y	M	lumosity	lumosity.y	43	8.26472	16	103.9697618	-271.824	103.9736211	-399	106.4132415	9	103.2905327	5	90.01558593	17	137.1423714	6	109.1710722	112.8648988	27	136.391296	-161.009	114.9928228	-449	94.14184935	6	93.70903787	6	102.2366507	13	107.6954863	6	109.1710722	114.0404806	32.4215342	11.01920163	-12.27139216	-9.581494836	12.22106476	-29.4468851	0	1.175581845	3	2
853	m	bachelors degree	25	y	Y	lumosity	lumosity.y	32	6.659169306	13	94.8395275	-121.573	119.930612	-388	109.6336875	3	83.61639412	5	90.01558593	7	84.57097827	4	84.66554136	91.81580556	17	106.9689563	-407.036	93.51727771	-394	107.9902732	0	70.89374579	6	102.2366507	13	107.6954863	5	97.01798159	96.51450927	12.12942879	-26.41333434	-1.643414306	-12.72264833	12.22106476	23.12450804	12.35244023	4.698703713	3	3
854	f	advanced degree	25	y	Y	lumosity	lumosity.y	58	14.70813194	11	88.54321663	-365.501	96.44939383	-542	78.17605863	7	96.91529003	6	102.2366507	12	102.1387281	5	97.01798159	90.43947695	16	103.9697618	-411.219	93.22556291	-449	94.14184935	8	100.0782549	7	114.8036483	7	84.57097827	6	109.1710722	99.88448031	15.42654515	-3.223830918	15.96579072	3.162964829	12.56699756	-17.56774979	12.15309064	9.445003361	1	2
855	m	bachelors degree	43	y	M	lumosity	lumosity.y	41	9.590675694	10	85.57372703	-496.92	87.17811182	-486	86.90753509	10	106.4827223	7	114.8036483	11	97.4198399	4	84.66554136	90.82892777	13	94.8395275	-562.366	83.09218105	-390	109.1082611	9	103.2905327	6	102.2366507	10	93.4066386	6	109.1710722	98.69036998	9.265800469	-4.085930768	22.20072605	-3.19218958	-12.56699756	-4.013201299	24.50553087	7.861442217	2	4
856	f	some college	47	y	M	lumosity	lumosity.y	45	8.485169861	17	106.9689563	-302.655	101.8567539	-443	95.50283079	0	70.89374579	7	114.8036483	8	87.11355617	6	109.1710722	96.48770505	12	91.65967918	-391.284	94.64933613	-393	108.3012051	0	70.89374579	8	127.5555825	15	120.1949445	6	109.1710722	105.3070034	-15.3092771	-7.207417814	12.79837431	0	12.75193428	33.08138829	0	8.819298366	4	4
857	f	hs grad or less	59	o	M	lumosity	lumosity.o	64	13.90486056	15	100.8687377	-188.541	111.9621709	-339	125.2148302	5	90.43034386	5	90.01558593	12	102.1387281	4	84.66554136	101.0890663	14	97.84621295	-583.654	81.76777192	-386	110.2934782	6	93.70903787	5	90.01558593	12	102.1387281	5	97.01798159	93.26268066	-3.022524772	-30.194399	-14.92135197	3.278694015	0	0	12.35244023	-7.826385598	4	4
858	f	advanced degree	25	y	Y	crosswords	crosswords.y	40	7.262226666	27	136.391296	-252.621	106.1164189	-365	116.9642084	18	131.5085227	3	69.29136417	10	93.4066386	5	97.01798159	112.1681575	26	132.9285386	-218.239	109.0009546	-394	107.9902732	18	131.5085227	6	102.2366507	12	102.1387281	4	84.66554136	116.9359838	-3.462757389	2.884535688	-8.973935195	0	32.94528652	8.732089463	-12.35244023	4.767826254	1	1
859	f	advanced degree	30	y	Y	crosswords	crosswords.y	28	8.531654722	22	121.4547391	-196.785	110.9300349	-439	96.43789596	13	116.0032086	5	90.01558593	8	87.11355617	6	109.1710722	107.5006071	24	127.258891	-202.199	110.1759008	-376	113.3618283	15	122.4665932	6	102.2366507	14	113.8168191	5	97.01798159	120.9290917	5.804151954	-0.754134092	16.92393236	6.463384573	12.22106476	26.70326289	-12.15309064	13.42848461	4	4
860	m	advanced degree	35	y	Y	lumosity	lumosity.y	50	11.44805139	17	106.9689563	-459.053	89.53608964	-375	113.7372763	5	90.43034386	6	102.2366507	14	113.8168191	6	109.1710722	106.299101	21	118.4923683	-260.226	105.4580238	-349	121.8885759	13	116.0032086	6	102.2366507	16	127.595966	8	133.0119868	130.7389955	11.52341201	15.92193415	8.151299634	25.57286475	0	13.77914691	23.8409146	24.43989453	2	3
861	m	some college	58	o	M	crosswords	crosswords.o	61	15.40332194	12	91.65967918	-453.784	89.65931362	-418	101.2497901	5	90.43034386	0	61.31611067	5	78.88184489	4	84.66554136	75.92025336	14	97.84621295	-509.644	85.93640305	-420	100.6933581	7	96.91529003	5	90.01558593	2	66.18670658	5	97.01798159	84.00337332	6.18653377	-3.722910569	-0.556432006	6.484946169	28.69947526	-12.69513831	12.35244023	8.08311996	4	4
862	m	advanced degree	26	y	Y	crosswords	crosswords.y	45	6.325114444	7	75.29108861	-392.261	94.40238768	-457	92.49939293	4	87.02169153	4	78.64839376	15	120.1949445	4	84.66554136	83.54176329	6	71.50566007	-563.027	82.79341523	-425	99.46328321	5	90.43034386	6	102.2366507	13	107.6954863	4	84.66554136	84.87146459	-3.785428537	-11.60897245	6.963890277	3.408652324	23.58825693	-12.49945815	0	1.329701303	2	2
863	NA	advanced degree	47	y	M	lumosity	lumosity.y	25	4.7739675	14	97.84621295	-223.123	108.2751593	-378	112.741526	10	106.4827223	6	102.2366507	1	58.40134056	5	97.01798159	95.70122554	14	97.84621295	-340.249	98.82871971	-412	103.0124308	8	100.0782549	5	90.01558593	10	93.4066386	4	84.66554136	91.9323203	0	-9.446439579	-9.729095264	-6.404467432	-12.22106476	35.00529803	-12.35244023	-3.768905247	1	2
864	f	some college	60	o	M	lumosity	lumosity.o	54	20.48783625	5	67.59046395	-635.856	78.00278777	-480	88.08386544	8	100.0782549	6	102.2366507	15	120.1949445	4	84.66554136	85.32918863	19	112.8487574	-504.045	86.38131889	-433	97.65778733	6	93.70903787	6	102.2366507	9	90.06668352	6	109.1710722	97.8951468	45.25829349	8.378531121	9.573921894	-6.369216984	0	-30.12826095	24.50553087	12.56595817	2	4
865	f	some college	68	o	O	crosswords	crosswords.o	46	15.43849917	15	100.8687377	-378.392	95.53010728	-477	88.67744719	0	70.89374579	6	102.2366507	13	107.6954863	5	97.01798159	90.78396411	13	94.8395275	-595.806	80.83587294	-345	123.1166272	4	87.02169153	6	102.2366507	13	107.6954863	3	72.32266178	91.96674959	-6.02921023	-14.69423434	34.43918	16.12794574	0	0	-24.69531981	1.182785484	1	1
866	m	some college	22	y	Y	lumosity	lumosity.y	9	3.235631111	12	91.65967918	-383.92	95.18609297	-388	109.6336875	9	103.2905327	5	90.01558593	13	107.6954863	7	121.0680766	104.3065403	13	94.8395275	-432.278	91.64662801	-419	100.9770084	8	100.0782549	6	102.2366507	15	120.1949445	6	109.1710722	104.4504186	3.179848312	-3.539464955	-8.656679082	-3.212277852	12.22106476	12.49945815	-11.89700439	0.143878289	1	3
867	m	bachelors degree	29	y	Y	crosswords	crosswords.y	40	9.984508055	20	115.7229157	-300.223	101.9018231	-523	81.0860469	12	112.8487574	7	114.8036483	5	78.88184489	5	97.01798159	100.3279497	21	118.4923683	-173.992	113.1470924	-418	101.2497901	4	87.02169153	6	102.2366507	11	97.4198399	5	97.01798159	103.8695101	2.76945256	11.24526925	20.16374322	-25.82706591	-12.56699756	18.537995	0	3.541560398	3	3
868	f	bachelors degree	26	y	Y	lumosity	lumosity.y	42	11.60967167	18	109.8684494	-421.606	92.25346262	-488	86.53255909	14	119.1220614	7	114.8036483	11	97.4198399	7	121.0680766	110.0496155	17	106.9689563	-227.897	107.3910175	-412	103.0124308	10	106.4827223	6	102.2366507	13	107.6954863	7	121.0680766	113.0108477	-2.899493105	15.13755486	16.47987166	-12.63933906	-12.56699756	10.27564642	0	2.96123222	3	5
869	f	advanced degree	65	o	O	lumosity	lumosity.o	52	36.22106194	11	88.54321663	-648.633	77.3370101	-507	83.32230277	8	100.0782549	3	69.29136417	2	66.18670658	5	97.01798159	72.58420899	9	82.29468311	-263.294	105.0026123	-463	91.33146433	2	80.40665395	5	90.01558593	12	102.1387281	4	84.66554136	84.32862857	-6.248533522	27.66560221	8.009161561	-19.67160091	20.72422176	35.95202148	-12.35244023	11.74441958	1	3
870	f	bachelors degree	54	o	M	crosswords	crosswords.o	53	13.71539083	15	100.8687377	-346.854	98.34210698	-522	81.27434236	11	109.6062241	6	102.2366507	12	102.1387281	7	121.0680766	103.6426482	17	106.9689563	-873.89	65.69612425	-580	73.6425515	5	90.43034386	5	90.01558593	13	107.6954863	4	84.66554136	80.21261475	6.100218555	-32.64598272	-7.631790862	-19.17588021	-12.22106476	5.556758251	-36.40253527	-23.43003344	3	4
871	f	hs grad or less	18	y	Y	crosswords	crosswords.y	14	2.610900556	14	97.84621295	-244.563	106.4459211	-394	107.9902732	19	134.6704795	6	102.2366507	13	107.6954863	6	109.1710722	115.8721504	16	103.9697618	-142.668	117.9393078	-427	99.01925723	17	128.2711147	7	114.8036483	13	107.6954863	6	109.1710722	119.6459401	6.123548824	11.49338664	-8.971015972	-6.399364818	12.56699756	0	0	3.773789754	4	2
872	m	hs grad or less	30	y	Y	lumosity	lumosity.y	60	12.5702925	12	91.65967918	-413.529	93.07667344	-378	112.741526	7	96.91529003	4	78.64839376	4	75.15990345	3	72.32266178	80.46771087	12	91.65967918	-483.891	88.17560324	-453	93.3614607	4	87.02169153	5	90.01558593	10	93.4066386	4	84.66554136	82.51709539	0	-4.901070197	-19.38006532	-9.893598494	11.36719217	18.24673514	12.34287958	2.049384527	2	3
873	m	advanced degree	31	y	Y	lumosity	lumosity.y	54	14.96070583	18	109.8684494	-151.86	116.747015	-376	113.3618283	10	106.4827223	7	114.8036483	16	127.595966	6	109.1710722	123.9722289	16	103.9697618	-261.247	105.3347821	-336	126.0996401	12	112.8487574	7	114.8036483	15	120.1949445	5	97.01798159	119.5409917	-5.898687608	-11.41223291	12.73781179	6.366035154	0	-7.40102151	-12.15309064	-4.431237193	3	3
874	f	hs grad or less	52	o	M	lumosity	lumosity.o	47	10.12021528	10	85.57372703	-138.833	118.9801506	-381	111.8447446	0	70.89374579	5	90.01558593	9	90.06668352	4	84.66554136	88.0480691	10	85.57372703	-723.311	73.72935182	-377	113.0162768	3	83.61639412	5	90.01558593	8	87.11355617	5	97.01798159	82.97916139	0	-45.25079875	1.1715322	12.72264833	0	-2.953127341	12.35244023	-5.068907718	1	1
875	m	bachelors degree	35	y	Y	crosswords	crosswords.y	54	21.93126028	17	106.9689563	-184.226	112.7789827	-483	87.46044138	6	93.70903787	7	114.8036483	15	120.1949445	8	133.0119868	116.636277	15	100.8687377	-86.562	126.1676356	-648	66.8608924	11	109.6062241	6	102.2366507	17	137.1423714	8	133.0119868	118.2869503	-6.100218555	13.38865287	-20.59954898	15.89718619	-12.56699756	16.94742694	0	1.650673385	4	5
876	f	advanced degree	40	y	M	crosswords	crosswords.y	35	25.44880833	16	103.9697618	-290.774	102.6369078	-518	81.86102104	8	100.0782549	6	102.2366507	12	102.1387281	5	97.01798159	97.35552297	12	91.65967918	-173.992	113.1470924	-590	72.05241857	6	93.70903787	5	90.01558593	13	107.6954863	4	84.66554136	88.226378	-12.31008259	10.51018456	-9.808602478	-6.369216984	-12.22106476	5.556758251	-12.35244023	-9.129144964	2	1
877	f	advanced degree	39	y	Y	lumosity	lumosity.y	50	9.181677361	16	103.9697618	-596.784	80.69170953	-437	96.84674887	5	90.43034386	5	90.01558593	13	107.6954863	5	97.01798159	91.65967918	13	94.8395275	-327.339	99.72050347	-420	100.6933581	0	70.89374579	5	90.01558593	14	113.8168191	6	109.1710722	94.85929095	-9.130234283	19.02879394	3.846609246	-19.53659806	0	6.121332753	12.15309064	3.199611762	2	3
878	f	bachelors degree	24	y	Y	lumosity	lumosity.y	34	4.423051469	12	91.65967918	-545.051	83.95723497	-427	99.01925723	8	100.0782549	6	102.2366507	14	113.8168191	5	97.01798159	96.85436778	14	97.84621295	-85.28	127.8634635	-388	109.6336875	8	100.0782549	7	114.8036483	14	113.8168191	5	97.01798159	114.6407813	6.18653377	43.90622852	10.61443028	0	12.56699756	0	0	17.78641355	3	4
879	f	bachelors degree	66	o	O	crosswords	crosswords.o	66	26.66763694	21	118.4923683	-352.224	97.77088515	-544	77.83763691	9	103.2905327	5	90.01558593	14	113.8168191	7	121.0680766	105.2713147	16	103.9697618	-549.027	83.67041738	-636	67.66696116	9	103.2905327	6	102.2366507	13	107.6954863	4	84.66554136	88.27701822	-14.52260651	-14.10046777	-10.17067574	0	12.22106476	-6.121332753	-36.40253527	-16.99429644	3	3
880	f	bachelors degree	57	o	M	crosswords	crosswords.o	36	12.19593778	17	106.9689563	-209.09	109.6978949	-461	91.72050148	6	93.70903787	6	102.2366507	12	102.1387281	4	84.66554136	97.65024282	14	97.84621295	-359.96	96.87341151	-464	91.15914822	14	119.1220614	5	90.01558593	10	93.4066386	6	109.1710722	99.30291147	-9.122743327	-12.82448339	-0.561353257	25.41302348	-12.22106476	-8.732089463	24.50553087	1.652668657	2	1
881	f	bachelors degree	30	y	Y	lumosity	lumosity.y	40	7.981969444	9	82.29468311	-308.27	101.0405008	-451	93.74563994	8	100.0782549	5	90.01558593	13	107.6954863	5	97.01798159	93.00197304	6	71.50566007	-419.318	92.50361529	-474	89.17176197	9	103.2905327	5	90.01558593	12	102.1387281	4	84.66554136	83.62991985	-10.78902304	-8.536885474	-4.573877973	3.212277852	0	-5.556758251	-12.35244023	-9.372053192	3	4
882	m	bachelors degree	22	y	Y	lumosity	lumosity.y	50	23.78036681	16	103.9697618	-155.402	115.9571997	-450	93.96044048	9	103.2905327	6	102.2366507	11	97.4198399	5	97.01798159	103.2600023	17	106.9689563	-154.501	116.3565677	-402	105.565664	11	109.6062241	6	102.2366507	9	90.06668352	6	109.1710722	109.8314652	2.999194503	0.399368076	11.60522357	6.315691356	0	-7.353156381	12.15309064	6.571462976	2	4
883	m	bachelors degree	27	y	Y	lumosity	lumosity.y	4	0.728598472	14	97.84621295	-271.677	104.1862985	-339	125.2148302	16	125.4160785	6	102.2366507	14	113.8168191	7	121.0680766	121.7597095	14	97.84621295	-224.829	108.1712241	-408	104.1320842	12	112.8487574	6	102.2366507	16	127.595966	7	121.0680766	117.8255447	0	3.984925626	-21.08274594	-12.5673211	0	13.77914691	0	-3.934164808	2	4
884	f	hs grad or less	34	y	Y	crosswords	crosswords.y	66	20.88558361	13	94.8395275	-521.282	85.34120769	-419	100.9770084	3	83.61639412	7	114.8036483	10	93.4066386	5	97.01798159	92.47404628	14	97.84621295	-154.501	116.3565677	-429	98.58185637	13	116.0032086	5	90.01558593	7	84.57097827	6	109.1710722	102.9896203	3.006685458	31.01536003	-2.395152054	32.38681448	-24.78806232	-8.835660325	12.15309064	10.51557406	2	2
885	m	NA	44	y	M	crosswords	crosswords.y	67	5.934205556	9	82.29468311	-417.475	92.74332328	-491	86.02866905	6	93.70903787	6	102.2366507	13	107.6954863	6	109.1710722	93.50500199	11	88.54321663	-654.641	77.29023023	-496	85.25687548	0	70.89374579	4	78.64839376	11	97.4198399	4	84.66554136	72.68262135	6.248533522	-15.45309305	-0.771793572	-22.81529208	-23.58825693	-10.27564642	-24.50553087	-20.82238064	NA	NA
886	m	hs grad or less	51	o	M	crosswords	crosswords.o	67	19.46752444	12	91.65967918	-296.854	102.11238	-424	99.68323205	8	100.0782549	6	102.2366507	12	102.1387281	6	109.1710722	101.4930235	16	103.9697618	-232.182	106.9689563	-433	97.65778733	5	90.43034386	7	114.8036483	14	113.8168191	5	97.01798159	105.9467307	12.31008259	4.856576268	-2.025444717	-9.647910998	12.56699756	11.678091	-12.15309064	4.453707211	2	4
887	m	bachelors degree	23	y	Y	crosswords	crosswords.y	50	14.33627694	21	118.4923683	-349.53	98.07563584	-397	107.0063377	7	96.91529003	7	114.8036483	9	90.06668352	6	109.1710722	108.4449083	17	106.9689563	-207.255	109.8407057	-366	116.6156143	13	116.0032086	7	114.8036483	13	107.6954863	5	97.01798159	116.6431715	-11.52341201	11.76506983	9.609276619	19.08791858	0	17.6288028	-12.15309064	8.198263264	1	2
888	m	bachelors degree	24	y	Y	lumosity	lumosity.y	31	6.329366111	19	112.8487574	-264.024	104.8570837	-444	95.25665989	14	119.1220614	6	102.2366507	15	120.1949445	6	109.1710722	115.2968036	21	118.4923683	-369.318	96.13819431	-416	101.8154552	14	119.1220614	6	102.2366507	14	113.8168191	5	97.01798159	111.6120406	5.643610847	-8.71888936	6.558795346	0	0	-6.378125399	-12.15309064	-3.684763002	1	3
889	f	bachelors degree	22	y	Y	crosswords	crosswords.y	65	16.16956167	14	97.84621295	-184.97	112.6083954	-503	84.04936081	10	106.4827223	6	102.2366507	15	120.1949445	6	109.1710722	107.9430739	20	115.7229157	-142.668	117.9393078	-414	102.4290109	7	96.91529003	7	114.8036483	13	107.6954863	6	109.1710722	115.6200115	17.87670277	5.330912383	18.37965011	-9.567432261	12.56699756	-12.49945815	0	7.67693762	4	4
890	f	hs grad or less	28	y	Y	crosswords	crosswords.y	32	7.370467222	16	103.9697618	-243.907	106.5400463	-376	113.3618283	9	103.2905327	6	102.2366507	17	137.1423714	5	97.01798159	115.2717537	16	103.9697618	-498.827	86.84743527	-418	101.2497901	9	103.2905327	6	102.2366507	15	120.1949445	5	97.01798159	103.4854907	0	-19.69261104	-12.1120382	0	0	-16.94742694	0	-11.78626297	5	4
891	m	advanced degree	40	y	M	crosswords	crosswords.y	59	14.85058389	23	124.4099523	-282.364	103.172302	-445	95.02101858	15	122.4665932	6	102.2366507	14	113.8168191	6	109.1710722	116.9148546	25	129.8784281	-391.296	94.52604736	-418	101.2497901	11	109.6062241	5	90.01558593	15	120.1949445	6	109.1710722	112.9891481	5.468475799	-8.646254606	6.22877154	-12.86036912	-12.22106476	6.378125399	0	-3.925706479	1	2
892	m	bachelors degree	22	y	Y	crosswords	crosswords.y	47	2.487407778	9	82.29468311	-146.632	117.2932101	-402	105.565664	0	70.89374579	6	102.2366507	10	93.4066386	5	97.01798159	92.07406999	9	82.29468311	-294.287	102.330897	-588	72.28166831	9	103.2905327	7	114.8036483	11	97.4198399	8	133.0119868	101.1226952	0	-14.96231311	-33.28399574	32.39678691	12.56699756	4.013201299	35.99400524	9.048625187	2	2
893	f	some college	61	o	M	lumosity	lumosity.o	25	4.161835	14	97.84621295	-795.297	69.52982653	-455	92.86039548	2	80.40665395	4	78.64839376	8	87.11355617	4	84.66554136	74.0680415	14	97.84621295	-453.189	89.78654273	-441	95.98777089	5	90.43034386	6	102.2366507	10	93.4066386	5	97.01798159	91.69010741	0	20.25671621	3.127375404	10.02368991	23.58825693	6.293082423	12.35244023	17.62206591	3	3
894	m	hs grad or less	60	o	M	lumosity	lumosity.o	56	12.01761403	7	75.29108861	-413.529	93.07667344	-863	56.02249672	8	100.0782549	5	90.01558593	14	113.8168191	4	84.66554136	79.04127713	7	75.29108861	-414.952	93.01028162	-481	87.8628862	2	80.40665395	4	78.64839376	14	113.8168191	5	97.01798159	81.96125619	0	-0.066391811	31.84038948	-19.67160091	-11.36719217	0	12.35244023	2.919979058	2	4
895	f	advanced degree	31	y	Y	lumosity	lumosity.y	37	13.87622528	8	78.75052699	-413.585	93.03934482	-384	110.9835584	8	100.0782549	6	102.2366507	8	87.11355617	5	97.01798159	92.21085143	14	97.84621295	-391.296	94.52604736	-401	105.8259904	8	100.0782549	6	102.2366507	10	93.4066386	5	97.01798159	97.60118886	19.09568597	1.486702545	-5.157567959	0	0	6.293082423	0	5.390337425	1	NA
896	m	advanced degree	32	y	Y	crosswords	crosswords.y	1	0.501583889	7	75.29108861	-402.742	93.77814388	-469	90.19161952	5	90.43034386	5	90.01558593	11	97.4198399	4	84.66554136	80.79365598	8	78.75052699	-357.241	97.17365544	-483	87.46044138	0	70.89374579	6	102.2366507	6	81.96893327	4	84.66554136	76.78512993	3.459438376	3.395511561	-2.731178143	-19.53659806	12.22106476	-15.45090663	0	-4.008526043	1	1
897	f	advanced degree	26	y	Y	lumosity	lumosity.y	58	13.17919597	18	109.8684494	-244.563	106.4459211	-355	119.7341376	3	83.61639412	8	127.5555825	13	107.6954863	6	109.1710722	115.4353477	18	109.8684494	-435.29	91.26973999	-331	128.1185036	7	96.91529003	6	102.2366507	14	113.8168191	7	121.0680766	115.1906341	0	-15.17618113	8.384366034	13.2988959	-25.31893183	6.121332753	11.89700439	-0.244713671	3	5
898	f	some college	70	o	O	lumosity	lumosity.o	64	25.28845611	16	103.9697618	-296.854	102.11238	-468	90.38004825	11	109.6062241	5	90.01558593	9	90.06668352	6	109.1710722	98.70907215	19	112.8487574	-445.189	90.57605158	-561	75.75661905	2	80.40665395	5	90.01558593	10	93.4066386	4	84.66554136	82.4137841	8.878995662	-11.53632843	-14.6234292	-29.19957011	0	3.339955082	-24.50553087	-16.29528805	2	4
899	f	some college	22	y	Y	lumosity	lumosity.y	2	0.412737639	9	82.29468311	-524.448	85.07457541	-439	96.43789596	5	90.43034386	4	78.64839376	11	97.4198399	6	109.1710722	85.06234363	8	78.75052699	-335.954	98.93708578	-500	84.58362209	5	90.43034386	5	90.01558593	12	102.1387281	5	97.01798159	85.57372703	-3.544156124	13.86251037	-11.85427387	0	11.36719217	4.718888164	-12.15309064	0.511383401	NA	NA
900	f	advanced degree	32	y	Y	lumosity	lumosity.y	37	17.43705722	19	112.8487574	-123.177	119.5322891	-366	116.6156143	11	109.6062241	5	90.01558593	7	84.57097827	3	72.32266178	101.1413803	18	109.8684494	-65.63	132.1453918	-351	121.0980955	12	112.8487574	3	69.29136417	11	97.4198399	6	109.1710722	112.413164	-2.980308053	12.61310268	4.482481178	3.242533378	-20.72422176	12.84886162	36.84841046	11.27178368	3	3
901	f	advanced degree	65	o	O	lumosity	lumosity.o	68	26.41069764	7	75.29108861	-496.92	87.17811182	-545	77.69230099	4	87.02169153	6	102.2366507	12	102.1387281	3	72.32266178	77.06495059	6	71.50566007	-432.278	91.64662801	-476	88.83045447	6	93.70903787	5	90.01558593	13	107.6954863	5	97.01798159	85.27498585	-3.785428537	4.468516189	11.13815348	6.687346339	-12.22106476	5.556758251	24.69531981	8.210035258	4	3
902	f	advanced degree	29	y	Y	lumosity	lumosity.y	29	6.831417639	13	94.8395275	-323.645	99.93665093	-404	105.1012089	7	96.91529003	6	102.2366507	12	102.1387281	5	97.01798159	99.47074073	15	100.8687377	-219.511	108.8807824	-434	97.43874756	4	87.02169153	7	114.8036483	10	93.4066386	6	109.1710722	102.7315717	6.02921023	8.944131508	-7.662461308	-9.893598494	12.56699756	-8.732089463	12.15309064	3.260831013	2	3
903	f	some college	25	y	Y	lumosity	lumosity.y	48	26.27232736	13	94.8395275	-209.09	109.6978949	-392	108.5586767	8	100.0782549	5	90.01558593	13	107.6954863	5	97.01798159	101.7554089	19	112.8487574	-120.462	120.6949278	-412	103.0124308	13	116.0032086	7	114.8036483	12	102.1387281	6	109.1710722	119.0801455	18.00922994	10.99703292	-5.546245967	15.92495375	24.78806232	-5.556758251	12.15309064	17.32473664	2	3
904	m	bachelors degree	32	y	Y	crosswords	crosswords.y	58	16.89222361	21	118.4923683	-155.402	115.9571997	-402	105.565664	4	87.02169153	7	114.8036483	10	93.4066386	6	109.1710722	110.7799383	21	118.4923683	-259.836	105.5696562	-421	100.3950446	3	83.61639412	7	114.8036483	11	97.4198399	6	109.1710722	107.1187447	0	-10.38754345	-5.170619478	-3.405297409	0	4.013201299	0	-3.661193664	4	4
905	m	some college	44	y	M	crosswords	crosswords.y	68	26.41171583	14	97.84621295	-186.398	112.2616031	-395	107.6275565	13	116.0032086	4	78.64839376	12	102.1387281	6	109.1710722	105.7336783	17	106.9689563	-482.726	88.35776591	-416	101.8154552	10	106.4827223	5	90.01558593	6	81.96893327	4	84.66554136	90.14080227	9.122743327	-23.90383715	-5.812101249	-9.520486319	11.36719217	-20.16979479	-24.50553087	-15.592876	5	4
906	f	hs grad or less	18	y	Y	lumosity	lumosity.y	20	3.836641329	10	85.57372703	-101.001	123.7738898	-341	124.5226947	12	112.8487574	6	102.2366507	9	90.06668352	4	84.66554136	105.7256614	14	97.84621295	-296.854	102.11238	-381	111.8447446	6	93.70903787	6	102.2366507	12	102.1387281	6	109.1710722	104.4192755	12.27248593	-21.66150977	-12.67795012	-19.13971957	0	12.07204455	24.50553087	-1.306385947	3	3
907	m	some college	20	y	Y	lumosity	lumosity.y	15	2.256043889	20	115.7229157	-113.985	122.0300291	-378	112.741526	15	122.4665932	7	114.8036483	12	102.1387281	6	109.1710722	124.1612044	22	121.4547391	-84.028	128.9367294	-514	82.34692675	10	106.4827223	7	114.8036483	7	84.57097827	6	109.1710722	111.4917337	5.731823328	6.906700239	-30.39459927	-15.98387089	0	-17.56774979	0	-12.66947066	2	3
908	m	advanced degree	27	y	Y	crosswords	crosswords.y	14	3.727960555	28	139.4590829	-123.177	119.5322891	-387	109.9797641	16	125.4160785	8	127.5555825	13	107.6954863	8	133.0119868	140.4973994	28	139.4590829	-295.55	102.2215796	-404	105.1012089	9	103.2905327	8	127.5555825	16	127.595966	9	144.874283	136.9072026	0	-17.31070956	-4.878555181	-22.12554583	0	19.90047966	11.86229621	-3.590196779	3	2
909	NA	bachelors degree	24	y	Y	lumosity	lumosity.y	22	4.865959583	22	121.4547391	-632.162	78.27225736	-453	93.3614607	9	103.2905327	7	114.8036483	8	87.11355617	6	109.1710722	101.5904233	21	118.4923683	-155.402	115.9571997	-397	107.0063377	9	103.2905327	8	127.5555825	11	97.4198399	5	97.01798159	116.0890557	-2.962370769	37.6849423	13.64487699	0	12.75193428	10.30628372	-12.15309064	14.49863232	3	5
910	f	some college	62	o	M	lumosity	lumosity.o	39	8.167561389	9	82.29468311	-442.709	90.78396411	-469	90.19161952	5	90.43034386	5	90.01558593	10	93.4066386	3	72.32266178	78.3253172	13	94.8395275	-271.795	104.0431346	-353	120.446814	14	119.1220614	6	102.2366507	9	90.06668352	5	97.01798159	106.7043604	12.54484439	13.25917053	30.25519448	28.69171749	12.22106476	-3.339955082	24.69531981	28.3790432	3	2
911	f	bachelors degree	29	y	Y	lumosity	lumosity.y	38	6.904134444	9	82.29468311	-227.897	107.3910175	-466	90.74793348	3	83.61639412	6	102.2366507	8	87.11355617	7	121.0680766	93.66017673	14	97.84621295	-451.227	89.97369249	-506	83.49405805	10	106.4827223	7	114.8036483	9	90.06668352	6	109.1710722	97.84244787	15.55152985	-17.41732498	-7.253875428	22.86632816	12.56699756	2.953127341	-11.89700439	4.18227114	5	5
912	f	advanced degree	57	o	M	lumosity	lumosity.o	62	24.21424208	11	88.54321663	-421.606	92.25346262	-541	78.31472693	5	90.43034386	5	90.01558593	13	107.6954863	5	97.01798159	86.20594702	7	75.29108861	-369.063	96.21903	-590	72.05241857	6	93.70903787	7	114.8036483	15	120.1949445	4	84.66554136	89.39780885	-13.25212802	3.965567383	-6.262308362	3.278694015	24.78806232	12.49945815	-12.35244023	3.191861835	3	2
913	m	hs grad or less	38	y	Y	crosswords	crosswords.y	50	25.6305525	11	88.54321663	-161.009	114.9928228	-439	96.43789596	10	106.4827223	5	90.01558593	12	102.1387281	6	109.1710722	101.7178942	12	91.65967918	-739.072	72.74110899	-383	111.3076943	6	93.70903787	6	102.2366507	16	127.595966	6	109.1710722	101.8642643	3.116462554	-42.25171377	14.86979835	-12.77368442	12.22106476	25.45723791	0	0.146370089	4	5
914	f	hs grad or less	64	o	M	crosswords	crosswords.o	64	19.240225	13	94.8395275	-387.938	94.78810047	-356	119.4715541	0	70.89374579	4	78.64839376	8	87.11355617	3	72.32266178	79.95166373	14	97.84621295	-377.966	95.59628891	-486	86.90753509	0	70.89374579	5	90.01558593	7	84.57097827	4	84.66554136	78.50372242	3.006685458	0.808188435	-32.56401904	0	11.36719217	-2.542577902	12.34287958	-1.447941306	4	5
915	m	advanced degree	27	y	Y	lumosity	lumosity.y	64	17.29394347	17	106.9689563	-482.726	88.35776591	-313	134.1032486	8	100.0782549	5	90.01558593	14	113.8168191	4	84.66554136	104.1746765	17	106.9689563	-420.158	92.41058533	-351	121.0980955	11	109.6062241	6	102.2366507	13	107.6954863	7	121.0680766	114.6407813	0	4.052819417	-13.00515306	9.527969208	12.22106476	-6.121332753	36.40253527	10.4661048	2	2
917	f	bachelors degree	31	y	Y	lumosity	lumosity.y	63	54.65205528	16	103.9697618	-348.18	98.21832437	-368	115.9178826	7	96.91529003	6	102.2366507	13	107.6954863	5	97.01798159	105.1842005	17	106.9689563	-184.97	112.6083954	-351	121.0980955	8	100.0782549	5	90.01558593	12	102.1387281	5	97.01798159	107.260866	2.999194503	14.390071	5.180212933	3.162964829	-12.22106476	-5.556758251	0	2.076665536	2	4
918	f	advanced degree	24	y	Y	lumosity	lumosity.y	63	12.36713992	20	115.7229157	-153.546	116.5401196	-446	94.76830456	9	103.2905327	7	114.8036483	11	97.4198399	5	97.01798159	109.7346647	20	115.7229157	-252.416	106.2137347	-388	109.6336875	11	109.6062241	6	102.2366507	11	97.4198399	6	109.1710722	112.0288676	0	-10.32638489	14.86538295	6.315691356	-12.56699756	0	12.15309064	2.294202866	2	2
920	f	bachelors degree	53	o	M	lumosity	lumosity.o	56	62.89142125	8	78.75052699	-172.714	113.5568984	-411	103.29435	6	93.70903787	5	90.01558593	12	102.1387281	5	97.01798159	94.75246127	13	94.8395275	-427.878	91.89784845	-393	108.3012051	1	77.29023023	6	102.2366507	8	87.11355617	3	72.32266178	83.84454783	16.08900051	-21.65904994	5.006855127	-16.41880764	12.22106476	-15.02517189	-24.69531981	-10.90791344	3	4
921	f	bachelors degree	25	y	Y	lumosity	lumosity.y	40	12.11329861	12	91.65967918	-142.668	117.9393078	-425	99.46328321	8	100.0782549	6	102.2366507	9	90.06668352	7	121.0680766	105.3427222	15	100.8687377	-151.86	116.747015	-419	100.9770084	2	80.40665395	8	127.5555825	11	97.4198399	7	121.0680766	110.8814977	9.209058542	-1.192292722	1.513725214	-19.67160091	25.31893183	7.353156381	0	5.538775471	2	4
923	f	NA	46	y	M	lumosity	lumosity.y	27	6.931343333	19	112.8487574	-369.063	96.21903	-389	109.3559537	17	128.2711147	5	90.01558593	7	84.57097827	3	72.32266178	98.3046094	18	109.8684494	-271.677	104.1862985	-384	110.9835584	16	125.4160785	5	90.01558593	8	87.11355617	4	84.66554136	102.9136352	-2.980308053	7.967268451	1.627604744	-2.85503617	0	2.542577902	12.34287958	4.609025825	5	3
924	m	hs grad or less	27	y	Y	crosswords	crosswords.y	39	4.782901667	11	88.54321663	-262.847	105.0814721	-319	131.9626445	4	87.02169153	6	102.2366507	13	107.6954863	7	121.0680766	110.5974079	5	67.59046395	-475.409	88.76149924	-356	119.4715541	5	90.43034386	6	102.2366507	13	107.6954863	6	109.1710722	96.29207249	-20.95275268	-16.31997281	-12.49109037	3.408652324	0	0	-11.89700439	-14.30533539	4	2
925	m	hs grad or less	34	y	Y	lumosity	lumosity.y	45	20.07154779	16	103.9697618	-157.142	115.5944001	-396	107.3069857	18	131.5085227	6	102.2366507	10	93.4066386	4	84.66554136	109.5513935	22	121.4547391	-46.462	140.085246	-376	113.3618283	19	134.6704795	6	102.2366507	7	84.57097827	6	109.1710722	126.0489932	17.48497728	24.49084588	6.05484258	3.161956871	0	-8.835660325	24.50553087	16.49759974	4	4
926	m	bachelors degree	26	y	Y	lumosity	lumosity.y	55	13.41885097	21	118.4923683	-244.563	106.4459211	-352	120.8211365	16	125.4160785	9	140.9426022	13	107.6954863	7	121.0680766	134.458477	25	129.8784281	-474.234	88.96766226	-374	114.0404806	22	143.2148036	7	114.8036483	15	120.1949445	6	109.1710722	129.4569064	11.38605982	-17.47825886	-6.780655883	17.79872503	-26.138954	12.49945815	-11.89700439	-5.001570559	3	4
927	m	advanced degree	21	y	Y	crosswords	crosswords.y	59	11.367695	19	112.8487574	-120.493	120.3248281	-405	104.8688661	14	119.1220614	7	114.8036483	15	120.1949445	6	109.1710722	124.8990159	18	109.8684494	-383.961	95.11934849	-419	100.9770084	9	103.2905327	7	114.8036483	16	127.595966	6	109.1710722	114.6048226	-2.980308053	-25.20547957	-3.891857665	-15.83152864	0	7.40102151	0	-10.29419337	2	3
928	f	advanced degree	51	o	M	crosswords	crosswords.o	61	21.78059694	13	94.8395275	-323.645	99.93665093	-452	93.53363859	7	96.91529003	6	102.2366507	13	107.6954863	5	97.01798159	97.95158114	14	97.84621295	-121.573	119.930612	-330	128.4943399	8	100.0782549	6	102.2366507	14	113.8168191	6	109.1710722	117.1062417	3.006685458	19.99396112	34.96070133	3.162964829	0	6.121332753	12.15309064	19.15466055	4	4
929	m	bachelors degree	52	o	M	crosswords	crosswords.o	67	18.07351333	18	109.8684494	-186.398	112.2616031	-360	118.4923683	11	109.6062241	5	90.01558593	14	113.8168191	6	109.1710722	115.1719772	17	106.9689563	-453.664	89.70180559	-310	135.3517215	10	106.4827223	6	102.2366507	14	113.8168191	4	84.66554136	109.6199518	-2.899493105	-22.55979748	16.85935324	-3.123501776	12.22106476	0	-24.50553087	-5.552025419	4	4
930	m	NA	26	y	Y	crosswords	crosswords.y	45	10.96287222	16	103.9697618	-269.623	104.4153839	-421	100.3950446	5	90.43034386	7	114.8036483	6	81.96893327	5	97.01798159	98.19205214	15	100.8687377	-452.199	89.94572004	-519	81.68167022	6	93.70903787	4	78.64839376	6	81.96893327	6	109.1710722	84.32862857	-3.101024052	-14.46966389	-18.71337435	3.278694015	-36.15525449	0	12.15309064	-13.86342356	1	4
931	f	advanced degree	35	y	Y	lumosity	lumosity.y	32	6.779357639	12	91.65967918	-408.355	93.45995369	-403	105.3347821	8	100.0782549	6	102.2366507	8	87.11355617	4	84.66554136	91.18573388	13	94.8395275	-479.649	88.50326827	-409	103.8964838	7	96.91529003	5	90.01558593	10	93.4066386	6	109.1710722	94.30238467	3.179848312	-4.956685422	-1.438298336	-3.162964829	-12.22106476	6.293082423	24.50553087	3.116650789	3	5
932	f	hs grad or less	70	o	O	lumosity	lumosity.o	67	55.83609056	9	82.29468311	-511.054	85.78532497	-479	88.32752517	5	90.43034386	5	90.01558593	11	97.4198399	4	84.66554136	80.20371587	8	78.75052699	-504.616	86.2627237	-516	82.12907341	6	93.70903787	6	102.2366507	9	90.06668352	3	72.32266178	77.45300538	-3.544156124	0.477398735	-6.198451761	3.278694015	12.22106476	-7.353156381	-12.34287958	-2.750710485	1	4
933	f	some college	54	o	M	crosswords	crosswords.o	45	12.42075833	18	109.8684494	-371.281	96.02637887	-448	94.35441755	9	103.2905327	6	102.2366507	12	102.1387281	5	97.01798159	100.9919462	19	112.8487574	-207.255	109.8407057	-579	73.72935182	9	103.2905327	5	90.01558593	11	97.4198399	5	97.01798159	96.05338879	2.980308053	13.8143268	-20.62506574	0	-12.22106476	-4.718888164	0	-4.938557387	3	3
934	m	advanced degree	39	y	Y	lumosity	lumosity.y	65	17.28405653	16	103.9697618	-113.985	122.0300291	-429	98.58185637	7	96.91529003	5	90.01558593	15	120.1949445	5	97.01798159	106.9233266	18	109.8684494	-294.287	102.330897	-376	113.3618283	8	100.0782549	7	114.8036483	12	102.1387281	6	109.1710722	112.3921839	5.898687608	-19.69913214	14.77997195	3.162964829	24.78806232	-18.0562164	12.15309064	5.468857346	4	2
935	f	some college	36	y	Y	lumosity	lumosity.y	49	16.38432583	8	78.75052699	-202.199	110.1759008	-467	90.54425439	1	77.29023023	5	90.01558593	11	97.4198399	7	121.0680766	91.36227148	10	85.57372703	-302.943	101.586676	-428	98.81002988	3	83.61639412	4	78.64839376	7	84.57097827	5	97.01798159	82.86516708	6.823200042	-8.589224871	8.265775495	6.326163892	-11.36719217	-12.84886162	-24.05009504	-8.497104402	1	2
936	f	NA	21	y	Y	lumosity	lumosity.y	31	8.016219722	19	112.8487574	-139.313	118.7094231	-319	131.9626445	11	109.6062241	7	114.8036483	4	75.15990345	7	121.0680766	120.3622189	15	100.8687377	-151.86	116.747015	-383	111.3076943	15	122.4665932	6	102.2366507	14	113.8168191	7	121.0680766	121.4547391	-11.98001971	-1.962408112	-20.65495019	12.86036912	-12.56699756	38.65691561	0	1.0925202	2	4
938	f	hs grad or less	60	o	M	crosswords	crosswords.o	43	20.24091194	12	91.65967918	-209.09	109.6978949	-492	85.84360186	4	87.02169153	6	102.2366507	13	107.6954863	5	97.01798159	95.27232712	14	97.84621295	-867.026	66.09145713	-386	110.2934782	6	93.70903787	4	78.64839376	7	84.57097827	6	109.1710722	85.27498585	6.18653377	-43.60643777	24.44987633	6.687346339	-23.58825693	-23.12450804	12.15309064	-9.997341272	4	3
941	f	bachelors degree	24	y	Y	lumosity	lumosity.y	43	12.94381153	24	127.258891	-621.938	79.19837617	-371	114.870504	12	112.8487574	8	127.5555825	17	137.1423714	7	121.0680766	129.4313213	24	127.258891	-61.281	132.9285386	-316	133.1820152	11	109.6062241	7	114.8036483	16	127.595966	8	133.0119868	147.3777885	0	53.73016242	18.31151125	-3.242533378	-12.75193428	-9.546405435	11.94391021	17.94646726	3	4
942	f	bachelors degree	55	o	M	lumosity	lumosity.o	65	27.53353597	9	82.29468311	-408.355	93.45995369	-398	106.7043604	3	83.61639412	5	90.01558593	12	102.1387281	4	84.66554136	85.87266031	8	78.75052699	-403.523	93.65202668	-355	119.7341376	0	70.89374579	5	90.01558593	8	87.11355617	5	97.01798159	84.5456577	-3.544156124	0.192072986	13.02977722	-12.72264833	0	-15.02517189	12.35244023	-1.327002613	1	1
943	f	bachelors degree	25	y	Y	crosswords	crosswords.y	58	16.18815389	25	129.8784281	-103.832	123.2148701	-390	109.1082611	11	109.6062241	7	114.8036483	16	127.595966	7	121.0680766	133.1391076	13	94.8395275	-305.02	101.4593231	-479	88.32752517	12	112.8487574	6	102.2366507	14	113.8168191	7	121.0680766	108.4580105	-35.03890061	-21.75554699	-20.78073596	3.242533378	-12.56699756	-13.77914691	0	-24.6810971	4	4
944	m	advanced degree	27	y	Y	lumosity	lumosity.y	47	19.04617167	8	78.75052699	-459.041	89.55984121	-458	92.30876391	5	90.43034386	6	102.2366507	16	127.595966	7	121.0680766	100.2832236	12	91.65967918	-332.441	99.27306663	-495	85.37121426	5	90.43034386	7	114.8036483	12	102.1387281	6	109.1710722	98.15826538	12.9091522	9.713225417	-6.937549651	0	12.56699756	-25.45723791	-11.89700439	-2.124958206	2	2
945	f	some college	52	o	M	crosswords	crosswords.o	48	14.42401583	15	100.8687377	-256.134	105.6936104	-451	93.74563994	2	80.40665395	5	90.01558593	7	84.57097827	4	84.66554136	85.23269484	11	88.54321663	-738.324	72.79918511	-392	108.5586767	0	70.89374579	5	90.01558593	8	87.11355617	4	84.66554136	76.71078892	-12.3255211	-32.89442527	14.81303678	-9.512908155	0	2.542577902	0	-8.52190592	4	4
946	f	some college	62	o	M	lumosity	lumosity.o	61	16.21500319	19	112.8487574	-374.107	95.81370155	-379	112.4394233	11	109.6062241	6	102.2366507	5	78.88184489	6	109.1710722	104.9238906	21	118.4923683	-264.848	104.645504	-508	83.16233359	11	109.6062241	6	102.2366507	4	75.15990345	4	84.66554136	94.6215286	5.643610847	8.831802453	-29.27708975	0	0	-3.721941439	-24.50553087	-10.30236198	4	3
947	f	bachelors degree	29	y	Y	lumosity	lumosity.y	44	15.35305685	16	103.9697618	-736.378	73.04625094	-526	80.51978898	9	103.2905327	6	102.2366507	13	107.6954863	4	84.66554136	88.93833859	14	97.84621295	-264.024	104.8570837	-451	93.74563994	14	119.1220614	6	102.2366507	11	97.4198399	4	84.66554136	99.87702727	-6.123548824	31.81083273	13.22585096	15.83152864	0	-10.27564642	0	10.93868868	2	1
949	m	some college	19	y	Y	crosswords	crosswords.y	21	5.825956111	25	129.8784281	-252.055	106.2543601	-528	80.07839292	13	116.0032086	8	127.5555825	14	113.8168191	6	109.1710722	120.0848086	24	127.258891	-186.398	112.2616031	-407	104.3725965	20	137.6420803	6	102.2366507	15	120.1949445	5	97.01798159	124.8254264	-2.619537093	6.007243009	24.29420359	21.63887171	-25.31893183	6.378125399	-12.15309064	4.740617811	1	4
950	f	advanced degree	32	y	Y	lumosity	lumosity.y	27	6.312713056	6	71.50566007	-432.278	91.64662801	-393	108.3012051	7	96.91529003	8	127.5555825	5	78.88184489	6	109.1710722	95.98004611	11	88.54321663	-271.844	103.8502509	-421	100.3950446	5	90.43034386	7	114.8036483	10	93.4066386	5	97.01798159	96.99517349	17.03755656	12.20362291	-7.906160527	-6.484946169	-12.75193428	14.52479371	-12.15309064	1.015127379	4	5
951	m	advanced degree	31	y	Y	lumosity	lumosity.y	48	9.19352875	15	100.8687377	-146.632	117.2932101	-428	98.81002988	6	93.70903787	3	69.29136417	12	102.1387281	6	109.1710722	97.68795951	17	106.9689563	-384.842	94.98950798	-420	100.6933581	5	90.43034386	8	127.5555825	15	120.1949445	6	109.1710722	112.0288676	6.100218555	-22.30370213	1.883328234	-3.278694015	58.26421836	18.0562164	0	14.34090806	5	3
952	f	NA	54	o	M	lumosity	lumosity.o	63	174.4282075	13	94.8395275	-327.397	99.61613842	-501	84.4055999	3	83.61639412	6	102.2366507	7	84.57097827	3	72.32266178	80.74279394	10	85.57372703	-352.224	97.77088515	-545	77.69230099	5	90.43034386	5	90.01558593	12	102.1387281	5	97.01798159	85.28704751	-9.265800469	-1.845253266	-6.713298903	6.813949733	-12.22106476	17.56774979	24.69531981	4.544253573	3	4
953	f	some college	55	o	M	lumosity	lumosity.o	45	11.27718708	12	91.65967918	-271.677	104.1862985	-464	91.15914822	10	106.4827223	4	78.64839376	5	78.88184489	8	133.0119868	96.01865939	14	97.84621295	-432.278	91.64662801	-456	92.66782893	2	80.40665395	8	127.5555825	6	81.96893327	6	109.1710722	95.30755958	6.18653377	-12.53967044	1.508680709	-26.07606834	48.90718877	3.087088375	-23.8409146	-0.711099807	3	4
954	f	some college	56	o	M	crosswords	crosswords.o	45	14.67810278	21	118.4923683	-459.189	89.46944514	-472	89.57882363	11	109.6062241	6	102.2366507	14	113.8168191	4	84.66554136	101.7404017	19	112.8487574	-372.944	95.94527137	-461	91.72050148	14	119.1220614	5	90.01558593	14	113.8168191	5	97.01798159	104.8178305	-5.643610847	6.475826231	2.141677845	9.515837288	-12.22106476	0	12.35244023	3.077428837	3	4
955	f	hs grad or less	42	y	M	crosswords	crosswords.y	54	11.94271083	15	100.8687377	-302.914	101.6503948	-494	85.51443857	11	109.6062241	6	102.2366507	10	93.4066386	5	97.01798159	97.43118499	13	94.8395275	-274.828	103.7079275	-487	86.71556951	6	93.70903787	4	78.64839376	10	93.4066386	6	109.1710722	90.13155061	-6.02921023	2.057532748	1.201130943	-15.89718619	-23.58825693	0	12.15309064	-7.299634374	4	3
956	m	bachelors degree	30	y	Y	crosswords	crosswords.y	58	18.45408528	16	103.9697618	-172.743	113.3507497	-357	119.1978885	16	125.4160785	7	114.8036483	12	102.1387281	7	121.0680766	124.5226947	19	112.8487574	-76.11	130.6183038	-303	137.5558559	17	128.2711147	7	114.8036483	14	113.8168191	6	109.1710722	136.1827573	8.878995662	17.26755406	18.35796746	2.85503617	0	11.678091	-11.89700439	11.66006257	3	4
957	f	some college	38	y	Y	lumosity	lumosity.y	48	10.50345473	14	97.84621295	-393.459	94.31039417	-488	86.53255909	7	96.91529003	6	102.2366507	8	87.11355617	3	72.32266178	84.56465225	17	106.9689563	-288.13	102.8187586	-527	80.31004621	5	90.43034386	5	90.01558593	8	87.11355617	4	84.66554136	85.70337497	9.122743327	8.508364458	-6.222512882	-6.484946169	-12.22106476	0	12.34287958	1.138722719	3	1
958	f	some college	54	o	M	crosswords	crosswords.o	65	16.29771972	5	67.59046395	-435.444	91.20786746	-436	97.04838168	7	96.91529003	6	102.2366507	14	113.8168191	3	72.32266178	85.38919014	9	82.29468311	-435.444	91.20786746	-399	106.4132415	9	103.2905327	4	78.64839376	9	90.06668352	6	109.1710722	90.36173211	14.70421916	0	9.364859828	6.375242681	-23.58825693	-23.75013555	36.84841046	4.972541975	2	2
959	f	advanced degree	60	o	M	crosswords	crosswords.o	59	15.09199917	23	124.4099523	-227.431	107.7337662	-385	110.621335	6	93.70903787	6	102.2366507	12	102.1387281	3	72.32266178	103.1151647	21	118.4923683	-113.985	122.0300291	-327	129.3804064	11	109.6062241	5	90.01558593	12	102.1387281	4	84.66554136	113.4395835	-5.917584017	14.29626291	18.75907135	15.89718619	-12.22106476	0	12.34287958	10.32441887	2	4
960	m	bachelors degree	22	y	Y	crosswords	crosswords.y	10	3.490972222	22	121.4547391	-260.226	105.4580238	-304	137.062966	18	131.5085227	7	114.8036483	9	90.06668352	6	109.1710722	127.0668675	25	129.8784281	-159.167	115.2654979	-346	122.8514513	18	131.5085227	6	102.2366507	12	102.1387281	7	121.0680766	130.8000955	8.423689047	9.807474087	-14.21151468	0	-12.56699756	12.07204455	11.89700439	3.733227996	3	3
961	m	some college	38	y	Y	crosswords	crosswords.y	50	12.5248325	6	71.50566007	-367.027	96.37270158	-412	103.0124308	2	80.40665395	4	78.64839376	9	90.06668352	5	97.01798159	79.78659341	11	88.54321663	-259.836	105.5696562	-376	113.3618283	1	77.29023023	5	90.01558593	15	120.1949445	4	84.66554136	94.94614473	17.03755656	9.19695462	10.34939756	-3.116423718	11.36719217	30.12826095	-12.35244023	15.15955132	4	4
962	f	advanced degree	28	y	Y	lumosity	lumosity.y	48	10.92091022	15	100.8687377	-332.441	99.27306663	-430	98.36085186	11	109.6062241	3	69.29136417	13	107.6954863	5	97.01798159	95.49893293	18	109.8684494	-221.969	108.4449083	-441	95.98777089	18	131.5085227	7	114.8036483	12	102.1387281	6	109.1710722	117.1634865	8.99971166	9.171841635	-2.373080976	21.90229859	45.51228408	-5.556758251	12.15309064	21.66455361	3	4
963	f	bachelors degree	30	y	Y	crosswords	crosswords.y	48	13.41049889	22	121.4547391	-465.891	89.35950383	-379	112.4394233	0	70.89374579	7	114.8036483	8	87.11355617	6	109.1710722	101.0741218	18	109.8684494	-264.024	104.8570837	-424	99.68323205	9	103.2905327	5	90.01558593	14	113.8168191	7	121.0680766	110.335961	-11.58628967	15.49757984	-12.75619129	32.39678691	-24.78806232	26.70326289	11.89700439	9.26183912	4	3
964	m	hs grad or less	48	y	M	crosswords	crosswords.y	70	17.58362528	12	91.65967918	-271.677	104.1862985	-489	86.37006083	6	93.70903787	5	90.01558593	8	87.11355617	5	97.01798159	87.56057666	13	94.8395275	-547.472	83.78451915	-407	104.3725965	11	109.6062241	6	102.2366507	2	66.18670658	4	84.66554136	86.53813428	3.179848312	-20.4017793	18.00253568	15.89718619	12.22106476	-20.9268496	-12.35244023	-1.022442376	3	4
965	f	some college	28	y	Y	lumosity	lumosity.y	45	17.38994806	15	100.8687377	-171.726	113.7429451	-332	127.6365504	5	90.43034386	7	114.8036483	12	102.1387281	6	109.1710722	114.1505822	13	94.8395275	-261.247	105.3347821	-312	134.6168278	11	109.6062241	7	114.8036483	10	93.4066386	6	109.1710722	114.8461587	-6.02921023	-8.408162984	6.980277329	19.17588021	0	-8.732089463	0	0.695576462	3	3
966	f	hs grad or less	58	o	M	crosswords	crosswords.o	67	16.07297639	14	97.84621295	-667.065	76.84664806	-460	91.91078039	3	83.61639412	5	90.01558593	2	66.18670658	5	97.01798159	76.87114663	14	97.84621295	-328.698	99.4334518	-416	101.8154552	2	80.40665395	6	102.2366507	6	81.96893327	6	109.1710722	93.28740291	0	22.58680374	9.904674838	-3.209740174	12.22106476	15.78222669	12.15309064	16.41625628	1	4
967	f	bachelors degree	41	y	M	crosswords	crosswords.y	64	21.34300417	15	100.8687377	-565.937	82.58307422	-471	89.77714362	7	96.91529003	6	102.2366507	10	93.4066386	5	97.01798159	90.72989814	13	94.8395275	-271.844	103.8502509	-447	94.56585795	5	90.43034386	5	90.01558593	8	87.11355617	5	97.01798159	89.65458717	-6.02921023	21.2671767	4.788714323	-6.484946169	-12.22106476	-6.293082423	0	-1.075310965	2	5
968	f	advanced degree	33	y	Y	crosswords	crosswords.y	51	18.53749667	23	124.4099523	-103.832	123.2148701	-430	98.36085186	13	116.0032086	7	114.8036483	15	120.1949445	6	109.1710722	126.3400178	21	118.4923683	-85.28	127.8634635	-374	114.0404806	13	116.0032086	5	90.01558593	14	113.8168191	7	121.0680766	124.8842501	-5.917584017	4.648593424	15.67962879	0	-24.78806232	-6.378125399	11.89700439	-1.455767717	1	2
969	f	bachelors degree	58	o	M	crosswords	crosswords.o	64	17.02634167	17	106.9689563	-173.992	113.1470924	-402	105.565664	6	93.70903787	6	102.2366507	9	90.06668352	6	109.1710722	104.8845807	18	109.8684494	-232.029	107.0812315	-404	105.1012089	12	112.8487574	6	102.2366507	9	90.06668352	5	97.01798159	105.8420672	2.899493105	-6.065860848	-0.464455175	19.13971957	0	0	-12.15309064	0.957486534	4	5
970	f	some college	20	y	Y	lumosity	lumosity.y	7	1.395916528	9	82.29468311	-263.294	105.0026123	-468	90.38004825	3	83.61639412	6	102.2366507	10	93.4066386	5	97.01798159	88.50326827	11	88.54321663	-134.107	119.206344	-444	95.25665989	8	100.0782549	5	90.01558593	10	93.4066386	5	97.01798159	95.85243155	6.248533522	14.20373172	4.876611639	16.46186073	-12.22106476	0	0	7.349163279	4	3
971	f	bachelors degree	63	o	M	crosswords	crosswords.o	66	19.51629417	17	106.9689563	-351.792	97.90267308	-394	107.9902732	8	100.0782549	4	78.64839376	9	90.06668352	3	72.32266178	88.51326299	19	112.8487574	-398.85	93.98871705	-421	100.3950446	10	106.4827223	5	90.01558593	10	93.4066386	3	72.32266178	92.34274355	5.879801159	-3.913956036	-7.595228632	6.404467432	11.36719217	3.339955082	0	3.829480552	2	2
972	f	some college	24	y	Y	lumosity	lumosity.y	28	6.90010625	17	106.9689563	-256.134	105.6936104	-365	116.9642084	6	93.70903787	6	102.2366507	8	87.11355617	5	97.01798159	102.2065107	19	112.8487574	-282.364	103.172302	-303	137.5558559	4	87.02169153	6	102.2366507	9	90.06668352	6	109.1710722	110.2134573	5.879801159	-2.52130841	20.59164753	-6.687346339	0	2.953127341	12.15309064	8.006946575	3	4
973	m	hs grad or less	64	o	M	lumosity	lumosity.o	2	0.376719028	18	109.8684494	-189.432	111.8294817	-445	95.02101858	10	106.4827223	7	114.8036483	13	107.6954863	5	97.01798159	110.3690605	21	118.4923683	-352.224	97.77088515	-471	89.77714362	11	109.6062241	5	90.01558593	13	107.6954863	7	121.0680766	108.4318125	8.6239189	-14.05859654	-5.24387496	3.123501776	-24.78806232	0	24.05009504	-1.937248043	2	2
974	m	hs grad or less	22	y	Y	lumosity	lumosity.y	57	30.233895	13	94.8395275	-142.668	117.9393078	-425	99.46328321	0	70.89374579	3	69.29136417	10	93.4066386	3	72.32266178	80.00615103	10	85.57372703	-110.016	122.7097698	-380	112.1319449	3	83.61639412	5	90.01558593	8	87.11355617	5	97.01798159	94.661248	-9.265800469	4.770462012	12.6686617	12.72264833	20.72422176	-6.293082423	24.69531981	14.65509697	1	1
975	f	bachelors degree	61	o	M	lumosity	lumosity.o	44	10.66618278	16	103.9697618	-290.774	102.6369078	-485	87.0811887	10	106.4827223	5	90.01558593	6	81.96893327	7	121.0680766	98.23708691	20	115.7229157	-263.294	105.0026123	-449	94.14184935	17	128.2711147	6	102.2366507	11	97.4198399	6	109.1710722	112.4446798	11.75315395	2.36570447	7.060660655	21.78839242	12.22106476	15.45090663	-11.89700439	14.20759288	3	3
976	f	some college	63	o	M	lumosity	lumosity.o	56	16.60736694	8	78.75052699	-264.848	104.645504	-399	106.4132415	7	96.91529003	6	102.2366507	9	90.06668352	5	97.01798159	94.05730011	12	91.65967918	-614.214	79.78659341	-372	114.5570077	3	83.61639412	7	114.8036483	7	84.57097827	4	84.66554136	88.3879594	12.9091522	-24.85891059	8.143766179	-13.2988959	12.56699756	-5.495705243	-12.35244023	-5.669340705	2	1
977	f	some college	24	y	Y	crosswords	crosswords.y	12	4.371503333	8	78.75052699	-488.833	87.9608503	-390	109.1082611	5	90.43034386	7	114.8036483	14	113.8168191	5	97.01798159	97.84621295	6	71.50566007	-271.677	104.1862985	-424	99.68323205	0	70.89374579	7	114.8036483	7	84.57097827	6	109.1710722	88.76643248	-7.244866913	16.22544815	-9.425029087	-19.53659806	0	-29.24584079	12.15309064	-9.079780474	2	3
978	f	some college	57	o	M	crosswords	crosswords.o	66	23.78373972	15	100.8687377	-469.567	89.27787422	-336	126.0996401	6	93.70903787	6	102.2366507	12	102.1387281	6	109.1710722	105.6695891	17	106.9689563	-161.009	114.9928228	-428	98.81002988	7	96.91529003	6	102.2366507	14	113.8168191	5	97.01798159	107.4289074	6.100218555	25.71494854	-27.28961023	3.206252155	0	11.678091	-12.15309064	1.759318265	1	3
979	m	bachelors degree	31	y	Y	crosswords	crosswords.y	48	3.976803333	16	103.9697618	-666.561	76.9685292	-406	104.6415947	13	116.0032086	8	127.5555825	10	93.4066386	7	121.0680766	110.6069755	15	100.8687377	-198.579	110.7413789	-350	121.4651083	16	125.4160785	6	102.2366507	11	97.4198399	7	121.0680766	119.2657046	-3.101024052	33.7728497	16.82351357	9.412869933	-25.31893183	4.013201299	0	8.658729125	2	2
980	m	bachelors degree	46	y	M	lumosity	lumosity.y	55	11.99397681	19	112.8487574	-498.827	86.84743527	-374	114.0404806	10	106.4827223	7	114.8036483	15	120.1949445	6	109.1710722	115.5114752	18	109.8684494	-305.02	101.4593231	-408	104.1320842	12	112.8487574	7	114.8036483	14	113.8168191	8	133.0119868	121.8132083	-2.980308053	14.61188781	-9.908396442	6.366035154	0	-6.378125399	23.8409146	6.301733036	3	3
981	f	bachelors degree	29	y	Y	lumosity	lumosity.y	48	8.456990858	23	124.4099523	-373.533	95.87952609	-464	91.15914822	17	128.2711147	7	114.8036483	12	102.1387281	6	109.1710722	115.8070735	27	136.391296	-420.794	92.33425233	-404	105.1012089	5	90.43034386	6	102.2366507	14	113.8168191	6	109.1710722	111.9059195	11.98134367	-3.545273758	13.94206065	-37.84077085	-12.56699756	11.678091	0	-3.901154002	3	2
984	f	bachelors degree	58	o	M	lumosity	lumosity.o	60	44.26338542	10	85.57372703	-419.318	92.50361529	-581	73.46625424	0	70.89374579	3	69.29136417	5	78.88184489	3	72.32266178	64.52733815	9	82.29468311	-667.065	76.84664806	-466	90.74793348	7	96.91529003	5	90.01558593	12	102.1387281	5	97.01798159	84.32862857	-3.279043918	-15.65696723	17.28167924	26.02154423	20.72422176	23.25688317	24.69531981	19.80129042	1	3
985	f	bachelors degree	26	y	Y	lumosity	lumosity.y	42	31.59008111	16	103.9697618	-221.795	108.6465268	-370	115.2217812	7	96.91529003	6	102.2366507	14	113.8168191	6	109.1710722	112.0237286	13	94.8395275	-227.133	108.0117536	-319	131.9626445	9	103.2905327	6	102.2366507	14	113.8168191	5	97.01798159	112.2980717	-9.130234283	-0.634773256	16.74086325	6.375242681	0	0	-12.15309064	0.274343086	4	4
986	f	some college	41	y	M	lumosity	lumosity.y	57	19.12559375	19	112.8487574	-727.86	73.53721221	-353	120.446814	13	116.0032086	7	114.8036483	13	107.6954863	6	109.1710722	112.951239	18	109.8684494	-103.832	123.2148701	-331	128.1185036	14	119.1220614	7	114.8036483	11	97.4198399	6	109.1710722	125.0630564	-2.980308053	49.67765786	7.671689646	3.118852745	0	-10.27564642	0	12.11181732	3	2
987	m	bachelors degree	64	o	M	lumosity	lumosity.o	67	23.13755903	9	82.29468311	-628.847	78.75052699	-517	82.00724801	6	93.70903787	4	78.64839376	10	93.4066386	4	84.66554136	74.83097294	13	94.8395275	-445.189	90.57605158	-424	99.68323205	7	96.91529003	4	78.64839376	6	81.96893327	4	84.66554136	82.30963176	12.54484439	11.82552459	17.67598404	3.206252155	0	-11.43770533	0	7.478658824	4	3
988	f	some college	61	o	M	lumosity	lumosity.o	49	11.69182611	12	91.65967918	-402.742	93.77814388	-491	86.02866905	6	93.70903787	6	102.2366507	3	70.96685372	5	97.01798159	84.24477459	12	91.65967918	-753.288	72.05241857	-693	63.24467989	0	70.89374579	7	114.8036483	2	66.18670658	5	97.01798159	71.27593995	0	-21.72572531	-22.78398916	-22.81529208	12.56699756	-4.780147138	0	-12.96883464	3	4
989	m	some college	19	y	Y	lumosity	lumosity.y	15	7.526089444	12	91.65967918	-427.918	91.82445315	-366	116.6156143	7	96.91529003	6	102.2366507	15	120.1949445	5	97.01798159	103.8348481	11	88.54321663	-120.462	120.6949278	-359	118.7337831	7	96.91529003	6	102.2366507	13	107.6954863	7	121.0680766	113.2954656	-3.116462554	28.87047467	2.118168809	0	0	-12.49945815	24.05009504	9.460617531	1	2
990	f	hs grad or less	58	o	M	crosswords	crosswords.o	28	7.224025278	8	78.75052699	-259.836	105.5696562	-451	93.74563994	5	90.43034386	6	102.2366507	11	97.4198399	5	97.01798159	91.32706033	7	75.29108861	-488.734	87.99167976	-438	96.65600612	7	96.91529003	5	90.01558593	9	90.06668352	4	84.66554136	80.73429538	-3.459438376	-17.57797644	2.910366179	6.484946169	-12.22106476	-7.353156381	-12.35244023	-10.59276494	1	2
991	f	some college	63	o	M	crosswords	crosswords.o	66	26.96416194	20	115.7229157	-666.327	77.0168586	-499	84.72198782	6	93.70903787	6	102.2366507	6	81.96893327	5	97.01798159	88.150165	16	103.9697618	-346.854	98.34210698	-623	68.78973917	5	90.43034386	7	114.8036483	4	75.15990345	6	109.1710722	90.25153154	-11.75315395	21.32524837	-15.93224864	-3.278694015	12.56699756	-6.809029814	12.15309064	2.101366543	4	3
992	f	some college	19	y	Y	lumosity	lumosity.y	36	7.557884722	14	97.84621295	-172.714	113.5568984	-451	93.74563994	1	77.29023023	5	90.01558593	13	107.6954863	5	97.01798159	94.39439664	18	109.8684494	-445.217	90.43034386	-408	104.1320842	10	106.4827223	6	102.2366507	15	120.1949445	4	84.66554136	104.1785502	12.02223643	-23.12655453	10.38644426	29.19249206	12.22106476	12.49945815	-12.35244023	9.784153582	3	2
993	m	NA	31	y	Y	crosswords	crosswords.y	0	0	7	75.29108861	-85.302	126.860641	-469	90.19161952	10	106.4827223	5	90.01558593	12	102.1387281	4	84.66554136	93.93618633	9	82.29468311	-477.944	88.66753535	-408	104.1320842	11	109.6062241	6	102.2366507	13	107.6954863	6	109.1710722	100.7120106	7.0035945	-38.19310564	13.94046469	3.123501776	12.22106476	5.556758251	24.50553087	6.775824271	2	4
994	m	bachelors degree	35	y	Y	crosswords	crosswords.y	47	19.01370306	21	118.4923683	-189.432	111.8294817	-348	122.2515532	12	112.8487574	6	102.2366507	13	107.6954863	5	97.01798159	117.3149567	12	91.65967918	-50.811	134.2531421	-350	121.4651083	11	109.6062241	6	102.2366507	15	120.1949445	7	121.0680766	124.7669821	-26.8326891	22.42366043	-0.78644496	-3.242533378	0	12.49945815	24.05009504	7.452025377	2	3
995	f	bachelors degree	69	o	O	lumosity	lumosity.o	53	10.79587319	16	103.9697618	-370.77	96.09195223	-597	71.32242434	7	96.91529003	5	90.01558593	4	75.15990345	4	84.66554136	79.96985554	11	88.54321663	-721.638	73.81528126	-462	91.5288808	4	87.02169153	6	102.2366507	6	81.96893327	3	72.32266178	75.85242142	-15.42654515	-22.27667097	20.20645646	-9.893598494	12.22106476	6.809029814	-12.34287958	-4.117434123	4	4
996	m	hs grad or less	50	o	M	crosswords	crosswords.o	56	14.2378275	17	106.9689563	-365.501	96.44939383	-344	123.4396335	5	90.43034386	6	102.2366507	11	97.4198399	6	109.1710722	106.3887518	18	109.8684494	-146.726	117.0137466	-361	118.2244304	16	125.4160785	7	114.8036483	9	90.06668352	5	97.01798159	117.3367398	2.899493105	20.56435274	-5.215203078	34.98573468	12.56699756	-7.353156381	-12.15309064	10.94798805	3	4
997	f	some college	62	o	M	crosswords	crosswords.o	53	13.98471472	11	88.54321663	-500.891	86.78163008	-585	72.72165917	3	83.61639412	5	90.01558593	10	93.4066386	5	97.01798159	78.71999054	13	94.8395275	-805.818	69.01347299	-468	90.38004825	6	93.70903787	5	90.01558593	14	113.8168191	5	97.01798159	87.20494001	6.296310865	-17.76815709	17.65838908	10.09264375	0	20.41018047	0	8.484949467	4	3
998	f	bachelors degree	57	o	M	crosswords	crosswords.o	69	19.91850611	22	121.4547391	-146.632	117.2932101	-414	102.4290109	6	93.70903787	4	78.64839376	10	93.4066386	5	97.01798159	100.7605123	23	124.4099523	-188.541	111.9621709	-356	119.4715541	1	77.29023023	6	102.2366507	12	102.1387281	5	97.01798159	108.4405423	2.955213248	-5.331039177	17.04254322	-16.41880764	23.58825693	8.732089463	0	7.680030007	1	3
999	f	bachelors degree	31	y	Y	crosswords	crosswords.y	61	15.76229889	20	115.7229157	-359.96	96.87341151	-411	103.29435	8	100.0782549	5	90.01558593	14	113.8168191	5	97.01798159	103.8964838	20	115.7229157	-116.367	121.4754877	-382	111.5668384	10	106.4827223	6	102.2366507	9	90.06668352	4	84.66554136	107.8104777	0	24.60207622	8.27248839	6.404467432	12.22106476	-23.75013555	-12.35244023	3.913993949	3	4
1000	f	advanced degree	33	y	Y	lumosity	lumosity.y	10	1.734179444	15	100.8687377	-224.829	108.1712241	-481	87.8628862	11	109.6062241	6	102.2366507	12	102.1387281	4	84.66554136	98.7539492	18	109.8684494	-504.616	86.2627237	-425	99.46328321	13	116.0032086	6	102.2366507	10	93.4066386	4	84.66554136	97.8499779	8.99971166	-21.90850037	11.60039701	6.396984543	0	-8.732089463	0	-0.903971295	4	1
1001	f	bachelors degree	52	o	M	lumosity	lumosity.o	35	7.16592375	15	100.8687377	-628.847	78.75052699	-398	106.7043604	9	103.2905327	6	102.2366507	10	93.4066386	4	84.66554136	92.44021728	16	103.9697618	-535.334	84.45668681	-373	114.2907573	7	96.91529003	6	102.2366507	8	87.11355617	5	97.01798159	96.41489392	3.101024052	5.706159821	7.586396915	-6.375242681	0	-6.293082423	12.35244023	3.974676645	3	3
1002	m	bachelors degree	50	o	M	crosswords	crosswords.o	25	7.722223889	12	91.65967918	-290.774	102.6369078	-694	63.16921066	0	70.89374579	6	102.2366507	10	93.4066386	5	97.01798159	80.62324663	2	54.42440361	-184.97	112.6083954	-571	74.52106878	2	80.40665395	6	102.2366507	11	97.4198399	3	72.32266178	74.90679396	-37.23527558	9.971487538	11.35185812	9.512908155	0	4.013201299	-24.69531981	-5.716452678	1	1
1003	f	some college	24	y	Y	crosswords	crosswords.y	53	17.98333833	16	103.9697618	-358.931	96.91148389	-429	98.58185637	14	119.1220614	6	102.2366507	11	97.4198399	7	121.0680766	109.6611833	17	106.9689563	-282.364	103.172302	-347	122.5816515	12	112.8487574	5	90.01558593	14	113.8168191	6	109.1710722	114.0983342	2.999194503	6.26081808	23.99979516	-6.273303911	-12.22106476	16.39697917	-11.89700439	4.437150872	3	2
1004	f	advanced degree	29	y	Y	crosswords	crosswords.y	1	0.333634722	16	103.9697618	-877.859	65.48916582	-647	66.94590291	9	103.2905327	6	102.2366507	12	102.1387281	6	109.1710722	88.29218424	17	106.9689563	-226.823	108.1064635	-599	71.13480652	3	83.61639412	6	102.2366507	13	107.6954863	7	121.0680766	100.0558962	2.999194503	42.61729772	4.188903605	-19.67413858	0	5.556758251	11.89700439	11.76371196	2	4
1005	f	advanced degree	58	o	M	lumosity	lumosity.o	61	32.04942931	9	82.29468311	-433.99	91.42377682	-481	87.8628862	4	87.02169153	5	90.01558593	11	97.4198399	3	72.32266178	78.02460735	11	88.54321663	-853.783	67.07146141	-409	103.8964838	2	80.40665395	3	69.29136417	10	93.4066386	3	72.32266178	70.99107048	6.248533522	-24.35231541	16.03359759	-6.615037583	-20.72422176	-4.013201299	0	-7.033536868	4	2
1006	f	some college	24	y	Y	crosswords	crosswords.y	32	11.05536056	11	88.54321663	-579.319	82.04544572	-385	110.621335	5	90.43034386	6	102.2366507	11	97.4198399	5	97.01798159	92.01402091	15	100.8687377	-451.227	89.97369249	-439	96.43789596	2	80.40665395	6	102.2366507	13	107.6954863	5	97.01798159	93.71310661	12.3255211	7.928246777	-14.18343904	-10.02368991	0	10.27564642	0	1.699085705	4	2
1007	f	bachelors degree	62	o	M	crosswords	crosswords.o	55	15.20834917	15	100.8687377	-327.397	99.61613842	-499	84.72198782	11	109.6062241	6	102.2366507	6	81.96893327	5	97.01798159	94.04923798	13	94.8395275	-496.92	87.17811182	-576	74.00135838	8	100.0782549	5	90.01558593	13	107.6954863	4	84.66554136	84.79691492	-6.02921023	-12.43802659	-10.72062943	-9.527969208	-12.22106476	25.72655305	-12.35244023	-9.252323064	4	4
1008	m	advanced degree	26	y	Y	crosswords	crosswords.y	36	5.496097222	14	97.84621295	-155.402	115.9571997	-366	116.6156143	12	112.8487574	7	114.8036483	14	113.8168191	6	109.1710722	119.672328	15	100.8687377	-110.016	122.7097698	-376	113.3618283	14	119.1220614	7	114.8036483	12	102.1387281	8	133.0119868	126.2533933	3.022524772	6.752570116	-3.253785994	6.273303911	0	-11.678091	23.8409146	6.58106527	2	5
1009	f	advanced degree	29	y	Y	lumosity	lumosity.y	46	12.34731778	12	91.65967918	-327.339	99.72050347	-588	72.28166831	4	87.02169153	5	90.01558593	7	84.57097827	3	72.32266178	75.86602732	17	106.9689563	-704.612	74.50528551	-490	86.22868137	8	100.0782549	5	90.01558593	13	107.6954863	7	121.0680766	96.54512904	15.3092771	-25.21521796	13.94701305	13.05656332	0	23.12450804	48.74541485	20.67910172	4	5
1010	f	some college	33	y	Y	crosswords	crosswords.y	66	17.90328778	13	94.8395275	-562.9	82.95075509	-459	92.11688449	6	93.70903787	6	102.2366507	14	113.8168191	5	97.01798159	94.29036736	10	85.57372703	-1034.284	60.8859973	-397	107.0063377	7	96.91529003	7	114.8036483	12	102.1387281	5	97.01798159	91.13697227	-9.265800469	-22.06475779	14.8894532	3.206252155	12.56699756	-11.678091	0	-3.153395084	2	3
1011	m	advanced degree	23	y	Y	lumosity	lumosity.y	40	9.361290424	18	109.8684494	-331.313	99.35140352	-418	101.2497901	13	116.0032086	7	114.8036483	14	113.8168191	7	121.0680766	118.3892282	19	112.8487574	-164.372	114.2088377	-473	89.38345258	17	128.2711147	7	114.8036483	13	107.6954863	6	109.1710722	118.4446568	2.980308053	14.85743418	-11.86633754	12.2679061	0	-6.121332753	-11.89700439	0.055428587	3	4
1012	m	advanced degree	24	y	Y	crosswords	crosswords.y	56	13.74329222	19	112.8487574	-271.795	104.0431346	-401	105.8259904	11	109.6062241	7	114.8036483	14	113.8168191	7	121.0680766	119.9036186	20	115.7229157	-139.313	118.7094231	-383	111.3076943	16	125.4160785	6	102.2366507	13	107.6954863	6	109.1710722	121.8562079	2.874158287	14.66628851	5.481703862	15.80985448	-12.56699756	-6.121332753	-11.89700439	1.952589285	4	4
1013	f	advanced degree	43	y	M	crosswords	crosswords.y	43	10.82574417	14	97.84621295	-440.892	90.88725766	-348	122.2515532	11	109.6062241	6	102.2366507	11	97.4198399	4	84.66554136	100.9844772	15	100.8687377	-753.127	72.17826899	-351	121.0980955	6	93.70903787	6	102.2366507	10	93.4066386	5	97.01798159	95.11934849	3.022524772	-18.70898867	-1.153457728	-15.89718619	0	-4.013201299	12.35244023	-5.865128693	4	5
1014	m	bachelors degree	40	y	M	lumosity	lumosity.y	46	8.60272	9	82.29468311	-402.742	93.77814388	-407	104.3725965	10	106.4827223	5	90.01558593	12	102.1387281	5	97.01798159	94.08953147	16	103.9697618	-196.785	110.9300349	-389	109.3559537	14	119.1220614	6	102.2366507	14	113.8168191	6	109.1710722	116.5332772	21.67507867	17.15189106	4.983357153	12.63933906	12.22106476	11.678091	12.15309064	22.44374574	3	3
1015	f	bachelors degree	27	y	Y	crosswords	crosswords.y	43	12.20953806	19	112.8487574	-226.823	108.1064635	-441	95.98777089	17	128.2711147	7	114.8036483	3	70.96685372	8	133.0119868	115.3848162	18	109.8684494	-290.774	102.6369078	-435	97.25327203	15	122.4665932	7	114.8036483	7	84.57097827	8	133.0119868	115.6072001	-2.980308053	-5.469555708	1.265501146	-5.80452153	0	13.60412456	0	0.222383924	3	3
1016	f	bachelors degree	29	y	Y	lumosity	lumosity.y	47	10.80028069	19	112.8487574	-365.501	96.44939383	-527	80.31004621	12	112.8487574	5	90.01558593	13	107.6954863	6	109.1710722	102.0709891	18	109.8684494	-346.854	98.34210698	-414	102.4290109	4	87.02169153	7	114.8036483	12	102.1387281	6	109.1710722	105.7617501	-2.980308053	1.892713146	22.1189647	-25.82706591	24.78806232	-5.556758251	0	3.690761065	4	5
1017	m	bachelors degree	25	y	Y	lumosity	lumosity.y	59	14.08165168	24	127.258891	-170.2	113.9540899	-465	90.96779549	10	106.4827223	7	114.8036483	10	93.4066386	6	109.1710722	113.3120319	19	112.8487574	-425.646	92.1040469	-375	113.7372763	12	112.8487574	6	102.2366507	14	113.8168191	6	109.1710722	113.5737254	-14.41013357	-21.85004297	22.76948081	6.366035154	-12.56699756	20.41018047	0	0.261693499	3	4
1018	m	bachelors degree	27	y	Y	lumosity	lumosity.y	49	8.450401958	24	127.258891	-184.226	112.7789827	-332	127.6365504	10	106.4827223	6	102.2366507	14	113.8168191	7	121.0680766	127.3369671	23	124.4099523	-224.829	108.1712241	-347	122.5816515	10	106.4827223	8	127.5555825	17	137.1423714	6	109.1710722	133.3564171	-2.848938706	-4.607758636	-5.0548989	0	25.31893183	23.32555234	-11.89700439	6.019449935	3	3
1019	m	hs grad or less	18	y	Y	lumosity	lumosity.y	20	3.468619861	13	94.8395275	-227.431	107.7337662	-412	103.0124308	10	106.4827223	7	114.8036483	13	107.6954863	6	109.1710722	110.6261237	16	103.9697618	-189.432	111.8294817	-387	109.9797641	12	112.8487574	4	78.64839376	14	113.8168191	6	109.1710722	109.886964	9.130234283	4.095715465	6.967333297	6.366035154	-36.15525449	6.121332753	0	-0.739159702	4	4
1020	f	advanced degree	61	o	M	lumosity	lumosity.o	55	21.79538292	18	109.8684494	-552.72	83.59608053	-441	95.98777089	7	96.91529003	4	78.64839376	9	90.06668352	5	97.01798159	88.06853248	19	112.8487574	-356.836	97.35552297	-467	90.54425439	9	103.2905327	5	90.01558593	7	84.57097827	5	97.01798159	93.93214243	2.980308053	13.75944244	-5.443516499	6.375242681	11.36719217	-5.495705243	0	5.863609954	3	3
1021	m	bachelors degree	25	y	Y	crosswords	crosswords.y	57	15.07680611	20	115.7229157	-624.81	79.12011294	-404	105.1012089	9	103.2905327	8	127.5555825	13	107.6954863	5	97.01798159	108.7081987	19	112.8487574	-219.511	108.8807824	-396	107.3069857	13	116.0032086	7	114.8036483	12	102.1387281	5	97.01798159	114.214675	-2.874158287	29.7606695	2.20577687	12.7126759	-12.75193428	-5.556758251	0	5.506476346	4	3
1022	f	some college	47	y	M	crosswords	crosswords.y	52	28.59882722	8	78.75052699	-235.35	106.7661851	-568	74.96699241	3	83.61639412	6	102.2366507	12	102.1387281	3	72.32266178	80.53709627	14	97.84621295	-173.992	113.1470924	-449	94.14184935	5	90.43034386	5	90.01558593	12	102.1387281	6	109.1710722	99.10139925	19.09568597	6.380907273	19.17485694	6.813949733	-12.22106476	0	36.84841046	18.56430298	1	2
1023	m	bachelors degree	22	y	Y	lumosity	lumosity.y	46	12.45663767	24	127.258891	-164.372	114.2088377	-359	118.7337831	11	109.6062241	7	114.8036483	12	102.1387281	7	121.0680766	126.8052691	26	132.9285386	-38.146	141.5986594	-377	113.0162768	14	119.1220614	7	114.8036483	17	137.1423714	7	121.0680766	148.6215221	5.669647577	27.38982174	-5.717506292	9.515837288	0	35.00364335	0	21.81625296	2	1
1024	m	some college	21	y	Y	crosswords	crosswords.y	56	7.871174722	15	100.8687377	-111.781	122.2964448	-363	117.5640076	7	96.91529003	6	102.2366507	11	97.4198399	6	109.1710722	111.1695455	12	91.65967918	-121.573	119.930612	-349	121.8885759	14	119.1220614	7	114.8036483	13	107.6954863	7	121.0680766	123.2643672	-9.209058542	-2.365832794	4.324568333	22.20677133	12.56699756	10.27564642	11.89700439	12.09482169	4	4
1025	m	bachelors degree	45	y	M	lumosity	lumosity.y	19	6.829280139	16	103.9697618	-517.912	85.39517744	-353	120.446814	7	96.91529003	5	90.01558593	15	120.1949445	3	72.32266178	97.17365544	16	103.9697618	-407.036	93.51727771	-364	117.264271	5	90.43034386	7	114.8036483	14	113.8168191	5	97.01798159	107.4289074	0	8.122100276	-3.182542996	-6.484946169	24.78806232	-6.378125399	24.69531981	10.25525197	2	3
1026	f	bachelors degree	52	o	M	crosswords	crosswords.o	57	20.66450528	15	100.8687377	-342.421	98.61928295	-412	103.0124308	12	112.8487574	4	78.64839376	11	97.4198399	3	72.32266178	90.99904545	18	109.8684494	-189.432	111.8294817	-388	109.6336875	7	96.91529003	5	90.01558593	13	107.6954863	4	84.66554136	102.4894401	8.99971166	13.21019873	6.621256751	-15.93346741	11.36719217	10.27564642	12.34287958	11.49039469	4	3
1027	f	bachelors degree	44	y	M	lumosity	lumosity.y	41	14.81949	23	124.4099523	-450.023	90.00628302	-410	103.5889406	15	122.4665932	4	78.64839376	13	107.6954863	5	97.01798159	105.7818138	21	118.4923683	-98.626	124.3124216	-399	106.4132415	14	119.1220614	5	90.01558593	12	102.1387281	7	121.0680766	119.7873853	-5.917584017	34.30613854	2.824300941	-3.344531828	11.36719217	-5.556758251	24.05009504	14.00557142	5	2
1028	f	bachelors degree	54	o	M	crosswords	crosswords.o	69	23.10068806	20	115.7229157	-357.848	96.99137146	-455	92.86039548	15	122.4665932	5	90.01558593	14	113.8168191	6	109.1710722	110.0402894	22	121.4547391	-459.189	89.46944514	-426	99.23202524	15	122.4665932	6	102.2366507	12	102.1387281	6	109.1710722	111.1057264	5.731823328	-7.521926323	6.371629754	0	12.22106476	-11.678091	0	1.065437001	3	3
1029	m	some college	37	y	Y	lumosity	lumosity.y	57	14.98155722	25	129.8784281	-103.832	123.2148701	-377	113.0162768	7	96.91529003	6	102.2366507	6	81.96893327	5	97.01798159	110.7413789	25	129.8784281	-574.953	82.2722271	-385	110.621335	11	109.6062241	8	127.5555825	9	90.06668352	6	109.1710722	114.2731673	0	-40.94264297	-2.394941828	12.69093404	25.31893183	8.097750249	12.15309064	3.53178838	3	3
1030	f	bachelors degree	30	y	Y	lumosity	lumosity.y	28	6.473516866	15	100.8687377	-202.24	110.0356278	-410	103.5889406	2	80.40665395	7	114.8036483	8	87.11355617	5	97.01798159	98.36460053	13	94.8395275	-321.254	100.1527852	-473	89.38345258	1	77.29023023	7	114.8036483	11	97.4198399	7	121.0680766	98.6679247	-6.02921023	-9.882842541	-14.20548799	-3.116423718	0	10.30628372	24.05009504	0.303324168	2	3
1031	m	some college	21	y	Y	crosswords	crosswords.y	62	16.45545222	10	85.57372703	-142.668	117.9393078	-375	113.7372763	10	106.4827223	6	102.2366507	14	113.8168191	5	97.01798159	109.0545499	17	106.9689563	-419.007	92.56687967	-354	120.0483363	12	112.8487574	6	102.2366507	13	107.6954863	6	109.1710722	112.3607591	21.39522925	-25.37242808	6.311059972	6.366035154	0	-6.121332753	12.15309064	3.306209203	2	3
1032	m	hs grad or less	19	y	Y	crosswords	crosswords.y	22	4.833743611	20	115.7229157	-356.836	97.35552297	-375	113.7372763	23	145.5755964	8	127.5555825	15	120.1949445	6	109.1710722	132.18252	18	109.8684494	-295.156	102.2630306	-378	112.741526	10	106.4827223	6	102.2366507	15	120.1949445	6	109.1710722	115.1161468	-5.854466341	4.907507632	-0.995750277	-39.0928741	-25.31893183	0	0	-17.06637324	4	4
1033	m	hs grad or less	50	o	M	lumosity	lumosity.o	23	5.386344028	6	71.50566007	-729.171	73.43055144	-537	78.95188917	3	83.61639412	4	78.64839376	1	58.40134056	4	84.66554136	60.77326394	6	71.50566007	-621.938	79.19837617	-461	91.72050148	0	70.89374579	5	90.01558593	8	87.11355617	3	72.32266178	67.85460819	0	5.767824729	12.76861231	-12.72264833	11.36719217	28.71221561	-12.34287958	7.081344245	1	3
1034	f	some college	18	y	Y	lumosity	lumosity.y	48	17.13365264	10	85.57372703	-583.102	81.8687602	-454	93.12637837	4	87.02169153	4	78.64839376	14	113.8168191	4	84.66554136	81.61077177	10	85.57372703	-493.569	87.53427915	-395	107.6275565	0	70.89374579	6	102.2366507	12	102.1387281	6	109.1710722	91.33146433	0	5.665518944	14.50117812	-16.12794574	23.58825693	-11.678091	24.50553087	9.720692555	4	2
[truncated: 3,723 more rows]
[truncated: 28 more columns]
